# Supplementary material
Source: publisher figshare collection journal article supplement (https://acs.figshare.com/ndownloader/files/3012636)
Supplement: Supplementary file 1 [file 3012636]

data_rxxxxsf
# 
_audit.revision_id     1_0 
_audit.creation_date   ? 
_audit.update_record   'Initial release' 
# 
_cell.entry_id      xxxx 
_cell.length_a      126.690 
_cell.length_b      126.690 
_cell.length_c      122.000 
_cell.angle_alpha   90.000 
_cell.angle_beta    90.000 
_cell.angle_gamma   90.000 
# 
_entry.id   xxxx 
# 
_exptl_crystal.id   1 
# 
_reflns_scale.group_code   1 
# 
_symmetry.entry_id               xxxx 
_symmetry.space_group_name_H-M   'P 41 21 2' 
_symmetry.Int_Tables_number      92 
# 
#
loop_
_refln.crystal_id
_refln.wavelength_id
_refln.scale_group_code
_refln.index_h
_refln.index_k
_refln.index_l
_refln.status
_refln.pdbx_F_plus
_refln.pdbx_F_plus_sigma
_refln.pdbx_F_minus
_refln.pdbx_F_minus_sigma
_refln.pdbx_FWT
_refln.pdbx_PHWT
_refln.pdbx_DELFWT
_refln.pdbx_DELPHWT
1 1 1    2    1    2 0.00 1660.83   17.53 1638.25   17.53  448.48  113.60  510.84  -66.40 
1 1 1    2    1    3 0.00  752.88   15.12  780.59   15.12  238.94  119.72 1141.06  119.72 
1 1 1    2    1    4 1.00 1764.10   13.66 1779.65   13.66 1039.08  104.58  497.85  104.58 
1 1 1    2    1    5 0.00 1005.08   13.16  995.51   13.16  501.95  110.09  131.54  110.09 
1 1 1    2    1    6 0.00  837.82   13.21  833.28   13.21  500.07  -41.18  147.29  -41.18 
1 1 1    2    1    7 1.00 2873.70    8.45 2897.18    8.45 2094.38 -121.74  642.24 -121.74 
1 1 1    2    1    8 0.00  736.46   13.48  723.53   13.48  402.21   29.89   16.40 -150.11 
1 1 1    2    1    9 0.00  954.95   13.27  957.37   13.27  561.62   68.25   76.14 -111.75 
1 1 1    2    1   10 0.00 1830.22   11.67 1812.72   11.67 1225.95   45.41   63.80   45.41 
1 1 1    2    1   11 0.00 1619.00   12.18 1600.82   12.18 1272.29  -96.46  402.81  -96.46 
1 1 1    2    1   12 0.00 2116.67   10.90 2123.72   10.90 1410.25   12.28   53.83 -167.72 
1 1 1    2    1   13 0.00 1256.85   12.97 1259.58   12.97  685.20  168.13  320.19  -11.87 
1 1 1    2    1   14 0.00  998.39   13.59 1006.34   13.59  770.56 -169.31  199.49 -169.31 
1 1 1    2    1   15 0.00 1295.54   13.07 1304.75   13.07  787.46  -46.13  254.26  133.87 
1 1 1    2    1   16 0.00  844.51   14.14  851.14   14.14  606.65   16.50   52.68   16.50 
1 1 1    2    1   17 0.00 2233.11   10.86 2194.31   10.86 1729.58  130.53   13.05  -49.47 
1 1 1    2    1   18 0.00  545.89   16.75  534.28   16.75  206.08  -77.78  374.21  102.22 
1 1 1    2    1   19 1.00  455.09   19.46  447.00   19.46  286.52  115.07   47.50  -64.93 
1 1 1    2    1   20 0.00  331.28   24.22  309.56   24.22  121.51   48.74   39.64 -131.26 
1 1 1    2    1   21 0.00  317.83   27.86  288.23   27.86   93.15   37.35   57.33 -142.65 
1 1 1    2    1   22 0.00   92.51   44.63   56.12   44.63  316.84  170.08  674.88  170.08 
1 1 1    2    1   23 0.00  309.89   28.90  307.07   28.90   92.33  -29.15  178.33  150.85 
1 1 1    2    1   24 0.00  903.10   16.88  931.61   16.88  814.58  -20.60  172.15  -20.60 
1 1 1    2    1   25 0.00  261.08   49.83  254.11   49.83  123.93  -91.81  598.62  -91.81 
1 1 1    2    1   26 0.00  830.30   22.96  822.37   22.96  266.72  114.31  782.68  -65.69 
1 1 1    2    1   27 0.00  151.19   65.40  183.16   65.40   69.62  134.51  235.26  134.51 
1 1 1    2    1   28 0.00  144.31   71.28  199.57   71.28   63.94   65.97  236.85   65.97 
1 1 1    2    1   29 0.00   71.27   57.47  103.62   57.47  188.88 -107.03  419.55 -107.03 
1 1 1    2    1   30 0.00  313.63   51.93  343.82   51.93  156.11 -178.10  115.22    1.90 
1 1 1    2    1   31 0.00  486.70   36.00  498.65   36.00  387.12  -97.27    6.72   82.73 
1 1 1    2    1   32 0.00  438.22   40.82  443.74   40.82  308.96  119.21   84.35  -60.79 
1 1 1    2    1   33 0.00  306.42   65.26  202.12   65.26   66.34 -119.87   94.17   60.13 
1 1 1    2    1   34 0.00  208.72   71.10  248.09   71.10   44.06 -158.83  116.33   21.17 
1 1 1    2    1   35 0.00  215.61   72.95  239.41   72.95   48.15   52.93   61.75 -127.07 
1 1 1    2    1   36 0.00  190.61   64.95  330.06   64.95   44.75   36.08    5.32   36.08 
1 1 1    2    1   37 0.00  250.60   74.53  248.62   74.53   14.09   89.61    0.55   89.61 
1 1 1    2    1   38 0.00  134.06   71.78  129.80   71.78   16.93  108.53   72.73  108.53 
1 1 1    2    1   39 0.00  130.96   70.96  123.53   70.96   27.27 -154.77  168.24 -154.77 
1 1 1    2    1   40 0.00  146.60   75.03  155.06   75.03    6.30  -71.25    7.77  108.75 
1 1 1    2    1   41 0.00  164.91   76.95  146.20   76.95   14.85  -42.20  362.91  -42.20 
1 1 1    2    1   42 0.00  143.02   67.32   86.40   67.32  112.09  179.08  457.11  179.08 
1 1 1    2    1   43 0.00  143.98   71.82  118.53   71.82    6.79  137.08  248.26  -42.92 
1 1 1    3    1    1 0.00 1696.19   17.78 1717.26   17.78  896.41 -100.03  404.91 -100.03 
1 1 1    3    1    2 0.00 3805.82    0.72 3798.77    0.72 2140.98 -153.85 1098.06 -153.85 
1 1 1    3    1    3 0.00 1582.15   18.18 1584.55   18.18  632.75  129.61   71.64  -50.39 
1 1 1    3    1    4 0.00 2074.65   16.15 2021.41   16.15  801.30  -54.43  178.63  125.57 
1 1 1    3    1    5 0.00 1102.78   15.04 1100.85   15.04  574.92   86.45   16.26   86.45 
1 1 1    3    1    6 0.00 2383.89   11.36 2388.16   11.36 1493.07  108.43  413.00  108.43 
1 1 1    3    1    7 0.00 1147.89   13.21 1142.80   13.21  617.63  110.97   95.68  -69.03 
1 1 1    3    1    8 0.00  955.94   13.31  958.84   13.31  371.01  -63.75  376.61  116.25 
1 1 1    3    1    9 0.00  202.85   17.97  195.07   17.97   64.75  162.86  177.67  162.86 
1 1 1    3    1   10 0.00  882.84   13.39  894.71   13.39  438.48  148.90  221.29  -31.10 
1 1 1    3    1   11 0.00  709.22   14.04  720.10   14.04  485.87  143.67  148.87  143.67 
1 1 1    3    1   12 0.00 2012.73   11.61 2012.87   11.61 1550.37  105.78  426.42  105.78 
1 1 1    3    1   13 0.00  770.94   14.14  757.06   14.14  528.97  -61.55  134.45  -61.55 
1 1 1    3    1   14 0.00 1562.37   12.47 1530.06   12.47 1293.71   -5.32  474.70   -5.32 
1 1 1    3    1   15 0.00  665.29   14.76  653.40   14.76  374.72 -175.74  114.76    4.26 
1 1 1    3    1   16 0.00 1727.25   12.09 1778.78   12.09 1078.16  -62.21  318.75  117.79 
1 1 1    3    1   17 0.00  362.24   19.07  325.45   19.07   98.44 -173.61   57.91    6.39 
1 1 1    3    1   18 0.00 1488.94   13.73 1511.43   13.73 1123.16   74.00   85.67 -106.00 
1 1 1    3    1   19 0.00  476.24   18.64  507.48   18.64  266.68  -40.77  175.39  139.23 
1 1 1    3    1   20 0.00  591.58   17.42  592.29   17.42  420.51  -66.96   38.35  113.04 
1 1 1    3    1   21 0.00  770.68   17.47  741.59   17.47  595.31  -23.18   53.44  -23.18 
1 1 1    3    1   22 0.00  263.50   36.46  222.19   36.46   17.10  161.80  147.45  -18.20 
1 1 1    3    1   23 0.00  222.95   39.36  229.74   39.36    1.39 -152.72  128.33   27.28 
1 1 1    3    1   24 0.00  557.11   23.71  552.39   23.71  306.99  -11.88  232.82  168.12 
1 1 1    3    1   25 0.00  442.43   33.58  397.32   33.58  160.47    1.10  299.78 -178.90 
1 1 1    3    1   26 0.00  308.34   41.76  432.31   41.76  161.73   72.56   71.24   72.56 
1 1 1    3    1   27 0.00  834.91   21.15  861.79   21.15  387.84   63.99  590.27 -116.01 
1 1 1    3    1   28 1.00   89.91   59.74  120.42   59.74  254.50   60.32  584.46   60.32 
1 1 1    3    1   29 0.00  216.17   59.71  320.40   59.71   79.18 -121.33   84.82   58.67 
1 1 1    3    1   30 0.00  413.87   44.02  390.52   44.02  275.46   28.16   22.47 -151.84 
1 1 1    3    1   31 0.00  734.88   24.80  746.44   24.80  486.74  -90.09  291.84   89.91 
1 1 1    3    1   32 0.00  257.42   63.72  264.41   63.72   52.76   45.52   49.10 -134.48 
1 1 1    3    1   33 0.00  367.18   57.59  233.36   57.59   76.11   60.88  294.53 -119.12 
1 1 1    3    1   34 0.00  345.74   45.00  442.32   45.00  352.35  -22.72  120.04  -22.72 
1 1 1    3    1   35 0.00  179.88   74.48  155.98   74.48   20.97  101.71  136.66  101.71 
1 1 1    3    1   36 0.00  233.44   68.00  289.72   68.00  108.08  -20.86   22.36  159.14 
1 1 1    3    1   37 0.00  127.17   64.59   89.48   64.59  160.96   55.92  412.32   55.92 
1 1 1    3    1   38 0.00  103.97   75.67  192.50   75.67   12.38  115.97  132.84  115.97 
1 1 1    3    1   39 0.00  140.52   76.37  206.22   76.37   17.39 -154.64  305.20   25.36 
1 1 1    3    1   40 0.00  134.69   78.67  185.46   78.67   54.20  -26.87  183.36  153.13 
1 1 1    3    1   41 0.00  159.87   79.05  185.41   79.05   94.29 -153.48   86.32   26.52 
1 1 1    3    1   42 0.00   97.76   68.92  140.44   68.92   48.48 -104.75  305.95 -104.75 
1 1 1    3    1   43 0.00  167.39   83.72  256.02   83.72  258.15  -20.00   43.85  160.00 
1 1 1    3    2    1 0.00 1905.48   16.44 1948.52   16.44 1039.66 -112.98  505.09 -112.98 
1 1 1    3    2    2 0.00 1293.88   18.88 1315.84   18.88  623.27   66.51  177.14   66.51 
1 1 1    3    2    3 0.00 1171.55   16.91 1123.34   16.91  482.95   56.33    5.23   56.33 
1 1 1    3    2    4 0.00 3180.35   10.85 3231.37   10.85 1500.33   12.56  163.25   12.56 
1 1 1    3    2    5 0.00 1234.80   15.79 1249.66   15.79  607.92 -107.03   94.19   72.97 
1 1 1    3    2    6 0.00 1094.19   15.73 1099.52   15.73  523.97 -172.18  117.46    7.82 
1 1 1    3    2    7 0.00  956.28   13.95  946.50   13.95  454.65  -95.56  196.28   84.44 
1 1 1    3    2    9 0.00 1794.21   12.57 1741.99   12.57  989.92 -158.68  300.79   21.32 
1 1 1    3    2   10 0.00 1102.97   13.31 1129.12   13.31  810.29   45.31  217.90   45.31 
1 1 1    3    2   11 0.00  319.56   16.13  329.71   16.13   44.43   44.01  373.39   44.01 
1 1 1    3    2   12 0.00  931.66   13.80  950.58   13.80  636.55  162.12   68.97  162.12 
1 1 1    3    2   13 0.00  719.83   14.08  706.72   14.08  422.30  -35.00   58.48  145.00 
1 1 1    3    2   14 0.00 1695.43   12.10 1733.13   12.10 1102.30  -46.97  187.19  133.03 
1 1 1    3    2   15 0.00 1396.20   12.88 1349.26   12.88  954.31 -140.37   16.61   39.63 
1 1 1    3    2   16 0.00  781.69   14.55  762.19   14.55  426.63  -26.48  203.40  153.52 
1 1 1    3    2   17 0.00 1174.96   14.45 1158.20   14.45  787.57  134.13  224.82  -45.87 
1 1 1    3    2   18 1.00  804.30   15.13  750.56   15.13  676.65  -45.06  206.00  -45.06 
1 1 1    3    2   19 0.00  693.99   17.17  658.79   17.17  429.23  -55.61  173.64  124.39 
1 1 1    3    2   20 0.00 1222.48   14.88 1166.33   14.88  888.98 -110.25  125.68   69.75 
1 1 1    3    2   21 0.00  201.02   34.33  245.35   34.33   16.21   35.33  195.99   35.33 
1 1 1    3    2   22 0.00  523.52   20.63  500.65   20.63  439.84   52.13  196.38   52.13 
1 1 1    3    2   23 0.00  431.40   28.48  424.27   28.48  164.55   -7.79  295.39  172.21 
1 1 1    3    2   24 0.00  295.93   43.88  190.85   43.88   45.45   -5.78  376.84   -5.78 
1 1 1    3    2   25 1.00  610.25   23.83  613.00   23.83  552.55  157.07  174.84  157.07 
1 1 1    3    2   26 0.00  246.31   54.22  247.06   54.22   14.56 -134.34  210.89   45.66 
1 1 1    3    2   27 0.00  491.64   30.95  455.83   30.95  399.37 -149.41  150.02 -149.41 
1 1 1    3    2   28 0.00  345.39   42.52  335.86   42.52  172.60  -66.04   83.43  113.96 
1 1 1    3    2   29 0.00  106.06   64.54  127.47   64.54   59.44  135.96  147.64  135.96 
1 1 1    3    2   30 0.00  230.87   68.65  188.17   68.65    0.31   73.84   14.51 -106.16 
1 1 1    3    2   31 0.00  436.36   40.83  429.51   40.83  370.97  -19.45  138.89  -19.45 
1 1 1    3    2   32 0.00  579.20   32.21  579.61   32.21  575.43  157.52  185.23  157.52 
1 1 1    3    2   33 0.00  369.40   43.60  379.27   43.60  219.60 -143.44  154.16   36.56 
1 1 1    3    2   34 0.00  246.34   71.20  155.98   71.20   67.30   88.49  400.85   88.49 
1 1 1    3    2   35 0.00  185.37   76.46  214.99   76.46   11.33  118.35  261.09  118.35 
1 1 1    3    2   36 0.00  189.53   71.03   67.57   71.03    5.87 -130.28   20.68 -130.28 
1 1 1    3    2   37 0.00  183.05   78.43  181.92   78.43   12.41  -88.55  216.96  -88.55 
1 1 1    3    2   38 0.00  219.12   80.45  230.07   80.45  105.71   18.50  114.78 -161.50 
1 1 1    3    2   39 0.00  133.71   73.47  135.98   73.47   10.96   88.65   80.62  -91.35 
1 1 1    3    2   40 0.00  342.52   61.95  388.07   61.95  465.87   82.86   39.76  -97.14 
1 1 1    3    2   41 0.00  142.01   75.03  133.48   75.03    7.25 -107.17   41.86   72.83 
1 1 1    3    2   42 1.00  139.38   73.07  129.32   73.07    2.08  -65.85    6.32  114.15 
1 1 1    3    2   43 0.00  117.38   64.09   95.11   64.09   38.46  112.49  226.52  112.49 
1 1 1    4    1    1 0.00 1114.16   19.30 1108.35   19.30  537.05  104.35  193.65  104.35 
1 1 1    4    1    2 1.00 1112.13   16.85 1135.46   16.85  322.15 -141.72  266.41   38.28 
1 1 1    4    1    3 0.00 1446.24   16.67 1487.26   16.67  368.49 -174.43  482.17    5.57 
1 1 1    4    1    4 0.00 1556.45   18.53 1557.79   18.53  632.46   58.35   46.20 -121.65 
1 1 1    4    1    5 0.00 1647.82   16.67 1649.09   16.67  966.46  -75.03  244.54  -75.03 
1 1 1    4    1    6 0.00  688.98   15.04  697.54   15.04  187.05   32.88  371.86 -147.12 
1 1 1    4    1    7 0.00 1719.52   14.84 1671.11   14.84 1310.17  158.43  679.83  158.43 
1 1 1    4    1    8 0.00 1202.81   13.84 1178.43   13.84  878.58  -41.94  335.13  -41.94 
1 1 1    4    1    9 0.00  796.45   14.15  789.70   14.15  318.73 -116.61  305.51   63.39 
1 1 1    4    1   10 0.00 1629.91   12.44 1621.87   12.44 1182.10   81.67  329.59   81.67 
1 1 1    4    1   11 0.00 1562.33   12.88 1538.53   12.88 1047.35   91.64  101.72   91.64 
1 1 1    4    1   12 0.00  761.53   13.86  761.71   13.86  362.54   59.18  211.49 -120.82 
1 1 1    4    1   13 0.00 1283.74   13.06 1303.19   13.06  926.11   76.36  134.97   76.36 
1 1 1    4    1   14 0.00 1207.25   13.34 1196.31   13.34  826.15   77.16   47.65   77.16 
1 1 1    4    1   15 0.00  282.42   18.78  299.38   18.78    4.61   47.48    9.52 -132.52 
1 1 1    4    1   16 0.00  760.19   14.64  749.58   14.64  457.43   24.12   88.45 -155.88 
1 1 1    4    1   17 0.00  801.65   15.71  781.47   15.71  608.14  -60.40   65.42  -60.40 
1 1 1    4    1   18 0.00  514.58   17.90  488.40   17.90  268.48  121.37  143.01  -58.63 
1 1 1    4    1   19 0.00  640.52   16.00  642.67   16.00  535.12    3.81  138.92    3.81 
1 1 1    4    1   20 0.00 1010.21   14.61 1034.48   14.61  841.55 -105.14   96.75 -105.14 
1 1 1    4    1   21 0.00 1060.50   15.24 1030.58   15.24  860.41    2.36  122.61    2.36 
1 1 1    4    1   22 0.00 1009.68   15.88 1050.21   15.88  630.20  -41.69  342.37  138.31 
1 1 1    4    1   23 1.00 1123.11   18.42 1089.91   18.42  848.95  -63.39   44.20  116.61 
1 1 1    4    1   24 0.00  421.63   32.71  376.92   32.71  255.21  172.14    9.14  172.14 
1 1 1    4    1   25 0.00  222.77   52.12  330.55   52.12   65.05   29.10  121.19 -150.90 
1 1 1    4    1   26 0.00  187.39   53.41  257.35   53.41   41.84   96.73  308.74   96.73 
1 1 1    4    1   27 0.00  237.69   47.38  286.52   47.38   40.21   11.22  419.46   11.22 
1 1 1    4    1   28 0.00  188.80   62.58  113.74   62.58   99.01 -140.55  296.44 -140.55 
1 1 1    4    1   29 0.00  733.93   22.81  734.04   22.81  343.35 -173.83  524.16    6.17 
1 1 1    4    1   30 0.00  692.48   29.46  624.43   29.46  365.63  124.79  362.23  -55.21 
1 1 1    4    1   31 0.00  439.07   38.61  482.49   38.61  368.71   44.14   27.30   44.14 
1 1 1    4    1   32 0.00  498.69   36.49  466.11   36.49  215.48  -90.54  383.63   89.46 
1 1 1    4    1   33 0.00  211.18   71.35  171.04   71.35    1.19 -104.97   93.18 -104.97 
1 1 1    4    1   34 0.00  189.66   73.26  155.75   73.26   47.04 -128.31  255.14 -128.31 
1 1 1    4    1   35 0.00  178.81   75.28  179.17   75.28   64.32  144.83  338.60  144.83 
1 1 1    4    1   36 0.00  215.15   76.28  194.37   76.28   21.45   -1.08  112.82  178.92 
1 1 1    4    1   37 0.00  127.90   74.45  270.84   74.45   40.13 -124.20   94.26   55.80 
1 1 1    4    1   38 0.00  154.76   75.01  131.84   75.01   61.61  -80.56  278.65  -80.56 
1 1 1    4    1   39 0.00  209.17   81.40  201.43   81.40  124.94 -138.85   41.97 -138.85 
1 1 1    4    1   40 0.00  189.11   80.16  139.40   80.16   64.60   89.35  179.93  -90.65 
1 1 1    4    1   41 0.00  261.46   81.24  228.83   81.24  310.77  -91.16   94.74  -91.16 
1 1 1    4    1   42 0.00  134.04   74.80  143.34   74.80   15.44 -118.96  223.66   61.04 
1 1 1    4    1   43 0.00   95.58   60.11   98.52   60.11   58.69  -85.62  238.88  -85.62 
1 1 1    4    2    1 1.00 1689.86   17.74 1699.98   17.74  891.89 -128.71  414.82 -128.71 
1 1 1    4    2    3 0.00  822.30   17.35  777.03   17.35  115.03   45.24  415.88 -134.76 
1 1 1    4    2    4 0.00  966.63   18.16  974.81   18.16  351.71  100.93  260.03  -79.07 
1 1 1    4    2    5 0.00  870.50   17.42  882.04   17.42  248.07  -34.47  386.15  145.53 
1 1 1    4    2    6 0.00  364.79   18.34  353.49   18.34   26.29   14.43   43.46 -165.57 
1 1 1    4    2    7 0.00  338.35   16.62  308.10   16.62   52.86   27.51  363.66   27.51 
1 1 1    4    2    8 0.00 1306.73   13.88 1335.31   13.88  658.11   78.89  313.61 -101.11 
1 1 1    4    2    9 0.00 1976.21   12.72 1951.20   12.72 1415.01  100.74  357.90  100.74 
1 1 1    4    2   10 0.00 1859.09   12.67 1871.25   12.67 1114.85   73.27  186.32 -106.73 
1 1 1    4    2   11 0.00  704.11   14.02  722.62   14.02  396.71  -31.64   58.26  148.36 
1 1 1    4    2   12 0.00 1803.50   12.43 1789.46   12.43 1299.94  -51.64  236.80  -51.64 
1 1 1    4    2   13 0.00 1295.98   13.03 1301.60   13.03 1143.99  119.41  570.41  119.41 
1 1 1    4    2   14 0.00  632.18   14.67  629.71   14.67  391.64   -1.76   46.86   -1.76 
1 1 1    4    2   15 0.00  864.21   14.03  844.18   14.03  497.32  -86.03  158.19   93.97 
1 1 1    4    2   16 0.00  777.28   14.52  796.02   14.52  575.08  -56.82  103.67  -56.82 
1 1 1    4    2   17 1.00  297.05   23.90  268.32   23.90   22.33 -162.79  139.74   17.21 
1 1 1    4    2   18 0.00  179.31   30.76  246.58   30.76   57.03  166.22  233.55  166.22 
1 1 1    4    2   19 1.00  322.43   22.70  331.22   22.70  121.00 -100.98  129.39   79.02 
1 1 1    4    2   20 0.00  391.53   22.51  341.89   22.51  156.35   -8.49  164.17  171.51 
1 1 1    4    2   21 0.00  932.15   16.03  905.05   16.03  554.16 -158.20  307.81   21.80 
1 1 1    4    2   22 0.00  956.93   16.43  983.19   16.43  812.26 -124.89  117.66 -124.89 
1 1 1    4    2   23 0.00  247.75   37.12  311.03   37.12   19.18   68.79  395.13   68.79 
1 1 1    4    2   24 0.00  718.96   21.14  734.49   21.14  584.25   -1.89   36.44   -1.89 
1 1 1    4    2   25 1.00  488.18   29.37  484.11   29.37  239.28   81.86  234.57  -98.14 
1 1 1    4    2   26 1.00  797.15   21.82  783.06   21.82  638.68  121.09   42.15  121.09 
1 1 1    4    2   27 0.00  241.22   54.60  210.22   54.60    5.89  167.35  150.71  -12.65 
1 1 1    4    2   28 0.00  828.96   21.89  845.62   21.89  513.91  110.14  343.30  -69.86 
1 1 1    4    2   29 0.00  514.31   33.97  420.47   33.97  236.51   13.86  262.99 -166.14 
1 1 1    4    2   30 0.00  578.15   32.30  550.50   32.30  485.52   -2.11   69.93   -2.11 
1 1 1    4    2   31 0.00  736.56   24.85  723.38   24.85  546.54  -38.65  161.66  141.35 
1 1 1    4    2   32 0.00  568.77   33.92  529.43   33.92  483.61   -0.76   47.02   -0.76 
1 1 1    4    2   33 0.00  107.93   72.93  210.74   72.93  184.73  -20.72  570.93  -20.72 
1 1 1    4    2   34 0.00  159.09   70.63  281.69   70.63   50.01   76.49  105.32 -103.51 
1 1 1    4    2   35 0.00  373.06   57.61  226.37   57.61   95.94 -123.98   41.66 -123.98 
1 1 1    4    2   36 0.00  248.83   73.82  214.55   73.82   28.31 -105.67  278.51   74.33 
1 1 1    4    2   37 0.00  330.67   64.42  280.74   64.42  238.55 -118.67   29.41 -118.67 
1 1 1    4    2   38 0.00  174.32   76.74  302.69   76.74  139.39  -45.80    1.90  -45.80 
1 1 1    4    2   39 0.00  509.50   44.13  461.98   44.13  712.10  -48.46  146.13  -48.46 
1 1 1    4    2   40 0.00   84.88   56.11   84.41   56.11   29.06  -71.07   82.26  -71.07 
1 1 1    4    2   41 0.00  115.92   68.10  118.77   68.10   44.16  153.80  237.77  153.80 
1 1 1    4    2   42 1.00  138.89   71.70  119.36   71.70    8.08  100.61  153.48  -79.39 
1 1 1    4    2   43 0.00   85.26   54.14   82.73   54.14   19.75   45.55   63.11   45.55 
1 1 1    4    3    1 0.00  413.08   14.03  423.80   14.03  194.80   92.23  704.11   92.23 
1 1 1    4    3    2 0.00 1131.01   15.82 1140.50   15.82  469.59   86.71   22.53   86.71 
1 1 1    4    3    3 0.00  672.89   17.86  660.75   17.86   54.04   25.24  425.78 -154.76 
1 1 1    4    3    4 0.00 1364.91   18.86 1357.38   18.86  688.34 -162.63    7.86   17.37 
1 1 1    4    3    5 0.00 1672.92   17.23 1625.76   17.23  864.82  -23.63    6.63  -23.63 
1 1 1    4    3    6 0.00 1338.10   15.37 1354.51   15.37  950.63  -50.05  370.01  -50.05 
1 1 1    4    3    7 0.00  939.71   15.68  934.71   15.68  629.23  101.49  221.11  101.49 
1 1 1    4    3    8 0.00 1611.01   14.32 1606.62   14.32 1118.28   85.89  229.74   85.89 
1 1 1    4    3    9 0.00 2140.59   13.39 2109.98   13.39 1569.63    5.86  435.47    5.86 
1 1 1    4    3   10 0.00 1072.36   14.00 1069.09   14.00  739.35   -5.94  129.50   -5.94 
1 1 1    4    3   11 1.00 3450.64    3.87 3450.23    3.87 2468.95 -112.27  349.09 -112.27 
1 1 1    4    3   12 0.00 1629.05   13.00 1622.73   13.00 1247.63   49.29  350.61   49.29 
1 1 1    4    3   13 0.00 1510.36   12.75 1543.20   12.75 1051.68 -102.12   19.49 -102.12 
1 1 1    4    3   14 1.00  992.92   13.80  986.87   13.80  655.90 -135.85   10.08   44.15 
1 1 1    4    3   15 0.00  516.23   15.59  529.45   15.59  307.37  -53.58   18.25  126.42 
1 1 1    4    3   16 0.00 1732.49   13.92 1735.32   13.92 1565.15  -14.24  468.63  -14.24 
1 1 1    4    3   17 0.00  904.12   14.58  894.45   14.58  836.32 -136.78  343.17 -136.78 
1 1 1    4    3   18 0.00  172.92   31.66  187.50   31.66   31.91  122.20   96.58  122.20 
1 1 1    4    3   19 0.00  194.53   31.38  241.35   31.38   50.46  -65.24  299.77  -65.24 
1 1 1    4    3   20 0.00  581.67   18.17  607.44   18.17  410.55 -125.76   45.99   54.24 
1 1 1    4    3   21 0.00 1042.35   15.32 1031.04   15.32  839.79  -84.35   68.77  -84.35 
1 1 1    4    3   22 1.00  571.38   22.22  545.95   22.22  340.60   57.14  153.77 -122.86 
1 1 1    4    3   23 0.00  243.02   44.90  238.99   44.90   41.52   52.67  354.21   52.67 
1 1 1    4    3   24 0.00  690.77   21.18  731.98   21.18  623.35   54.36  141.02   54.36 
1 1 1    4    3   25 0.00  738.93   20.46  786.48   20.46  546.39  -79.46   90.80  100.54 
1 1 1    4    3   26 0.00  543.58   28.65  556.76   28.65  442.75  -40.29   69.98  -40.29 
1 1 1    4    3   27 0.00 1308.93   18.25 1392.66   18.25 1133.79   20.95   45.73   20.95 
1 1 1    4    3   28 0.00  656.37   27.71  661.69   27.71  550.14 -103.21   49.48 -103.21 
1 1 1    4    3   29 0.00  784.02   23.60  765.64   23.60  567.48  -48.47  157.52  131.53 
1 1 1    4    3   30 0.00  406.38   37.49  467.40   37.49  292.26 -128.99   87.96   51.01 
1 1 1    4    3   31 0.00  290.65   57.08  322.69   57.08   61.79   24.74    9.32   24.74 
1 1 1    4    3   32 0.00  446.37   38.15  466.39   38.15  260.83 -155.79  245.76   24.21 
1 1 1    4    3   33 0.00  621.55   31.04  611.29   31.04  727.31 -103.54  394.91 -103.54 
1 1 1    4    3   34 0.00  585.85   34.26  546.30   34.26  533.33   23.61   38.18   23.61 
1 1 1    4    3   35 0.00  103.62   61.84   95.11   61.84   92.61  176.55  223.60  176.55 
1 1 1    4    3   36 0.00  244.45   72.76  239.13   72.76   46.42 -133.19   19.95   46.81 
1 1 1    4    3   37 0.00  165.39   77.96  184.65   77.96   17.51   36.42  197.52   36.42 
1 1 1    4    3   38 0.00  178.92   78.46  168.35   78.46   15.51 -128.66  124.79   51.34 
1 1 1    4    3   39 0.00  305.98   62.66  350.61   62.66  423.31   47.68   14.96   47.68 
1 1 1    4    3   40 0.00   75.53   65.66  135.85   65.66   18.92 -140.87   95.44 -140.87 
1 1 1    4    3   41 0.00  128.88   63.25   67.87   63.25   87.73  -75.13  299.46  -75.13 
1 1 1    4    3   42 0.00  121.37   67.00  103.26   67.00   69.29  -64.02  330.54  -64.02 
1 1 1    4    3   43 0.00  108.28   60.59   89.58   60.59   32.01  -61.93  153.31  -61.93 
1 1 1    5    1    1 0.00 1616.37   23.07 1602.22   23.07  891.67   76.29  473.38   76.29 
1 1 1    5    1    2 0.00 2434.42   23.30 2443.22   23.30 1220.81  109.90  429.27  109.90 
1 1 1    5    1    3 0.00 2337.61   17.96 2341.07   17.96 1189.43 -103.94  442.21 -103.94 
1 1 1    5    1    4 0.00  558.82   16.58  551.73   16.58  167.75   81.26   84.70   81.26 
1 1 1    5    1    5 0.00  550.39   17.23  565.92   17.23  169.68 -123.59  151.70   56.41 
1 1 1    5    1    6 0.00  720.01   16.99  720.61   16.99  112.93 -179.44  546.33    0.56 
1 1 1    5    1    7 0.00 1904.98   15.47 1910.03   15.47  977.88 -169.93  215.03   10.07 
1 1 1    5    1    8 0.00 1316.58   15.04 1353.61   15.04 1032.39   64.00  491.96   64.00 
1 1 1    5    1    9 0.00  386.72   16.02  376.64   16.02   15.21 -128.60   10.50   51.40 
1 1 1    5    1   10 0.00 1303.93   13.83 1265.60   13.83  669.23 -155.26  260.99   24.74 
1 1 1    5    1   11 0.00 1827.96   12.75 1818.54   12.75 1239.99  -97.11  162.86  -97.11 
1 1 1    5    1   12 0.00  941.73   13.66  928.61   13.66  616.33  121.13   89.42  121.13 
1 1 1    5    1   13 0.00 1568.98   12.74 1540.91   12.74 1104.08  166.92  153.69  166.92 
1 1 1    5    1   14 0.00  980.42   13.74  944.99   13.74  542.91  179.73  165.27   -0.27 
1 1 1    5    1   15 0.00  359.24   19.08  320.80   19.08   78.45 -153.10   44.98   26.90 
1 1 1    5    1   16 0.00 1529.13   12.78 1585.91   12.78 1425.77  121.01  537.68  121.01 
1 1 1    5    1   17 0.00  946.78   15.62 1003.46   15.62  686.34  -78.62   66.76  101.38 
1 1 1    5    1   18 0.00  804.94   15.06  791.58   15.06  603.52  128.98   44.82  128.98 
1 1 1    5    1   19 0.00  498.85   17.52  531.17   17.52  342.26  129.58   35.47  -50.42 
1 1 1    5    1   20 0.00  266.78   31.79  222.16   31.79   10.24 -123.78  169.61   56.22 
1 1 1    5    1   21 0.00  855.44   15.90  843.50   15.90  557.07 -167.34  166.34   12.66 
1 1 1    5    1   22 0.00  631.15   20.59  658.39   20.59  303.60  -59.86  362.46  120.14 
1 1 1    5    1   23 0.00  543.59   24.26  579.37   24.26  279.95  -27.01  279.57  152.99 
1 1 1    5    1   24 0.00 1812.30   16.10 1853.26   16.10 1365.98  -71.09  209.66  108.91 
1 1 1    5    1   25 0.00  573.84   23.61  548.68   23.61  272.42  -43.80  289.37  136.20 
1 1 1    5    1   26 0.00  545.06   24.12  558.34   24.12  448.68  101.22  100.20  101.22 
1 1 1    5    1   27 0.00  392.13   32.55  378.48   32.55   91.09  173.56  380.38   -6.44 
1 1 1    5    1   28 0.00  393.29   34.47  345.36   34.47  147.49  138.39  229.44  -41.61 
1 1 1    5    1   29 0.00  172.40   63.53  194.66   63.53  131.77  -59.80  465.11  -59.80 
1 1 1    5    1   30 0.00 1132.81   20.57 1078.05   20.57  728.61  167.15  421.81  -12.85 
1 1 1    5    1   31 0.00  272.35   50.43  326.85   50.43  106.21   91.67  178.96  -88.33 
1 1 1    5    1   32 0.00  575.92   32.44  610.45   32.44  407.09   13.94  201.03 -166.06 
1 1 1    5    1   33 0.00  341.23   47.42  434.88   47.42  308.18 -153.62   17.16 -153.62 
1 1 1    5    1   34 0.00  139.94   71.93  199.12   71.93   66.12  101.82  306.79  101.82 
1 1 1    5    1   35 0.00  157.50   75.15  158.34   75.15   42.92 -111.88  190.19 -111.88 
1 1 1    5    1   36 0.00  124.90   75.79  182.02   75.79   34.25  -37.21  148.50  -37.21 
1 1 1    5    1   37 0.00   88.38   64.38  118.51   64.38   19.11   43.98   48.86   43.98 
1 1 1    5    1   38 0.00  315.70   61.87  383.14   61.87  379.58  -26.57  142.68  -26.57 
1 1 1    5    1   39 0.00  137.38   66.95   82.66   66.95  122.38 -147.85  434.01 -147.85 
1 1 1    5    1   40 0.00   93.77   57.44   82.13   57.44   62.66   33.98  183.36   33.98 
1 1 1    5    1   41 0.00  144.42   72.63  109.55   72.63   13.21  -89.54  182.97  -89.54 
1 1 1    5    1   42 0.00   95.80   64.01  112.70   64.01   44.43   84.88  198.26   84.88 
1 1 1    5    1   43 0.00  130.52   74.05  142.72   74.05   42.43  149.59   78.69  -30.41 
1 1 1    5    2    1 0.00 1783.00   19.22 1759.08   19.22  957.87    9.80  484.75    9.80 
1 1 1    5    2    2 0.00  690.85   15.77  696.58   15.77   50.01   89.10  647.48   89.10 
1 1 1    5    2    3 0.00  226.90   16.61  235.74   16.61   69.53  129.67  222.89  129.67 
1 1 1    5    2    4 0.00 1258.95   16.27 1331.55   16.27  751.06  158.56  233.53  158.56 
1 1 1    5    2    5 0.00 1285.93   18.75 1235.39   18.75  749.49  170.60  128.71  170.60 
1 1 1    5    2    6 0.00  816.50   17.45  801.47   17.45  411.69  158.97   30.09  -21.03 
1 1 1    5    2    7 0.00  408.55   16.96  399.43   16.96   17.55 -116.70  330.74   63.30 
1 1 1    5    2    8 0.00  293.94   17.77  318.01   17.77    0.65    1.19   70.73 -178.81 
1 1 1    5    2    9 0.00  610.27   14.78  603.34   14.78  339.06   83.42   74.94   83.42 
1 1 1    5    2   10 0.00  481.31   15.24  472.29   15.24  159.71   -4.54  151.75  175.46 
1 1 1    5    2   11 0.00 1387.48   13.79 1395.52   13.79  865.28  117.07   35.11  -62.93 
1 1 1    5    2   12 0.00 1429.65   13.75 1430.02   13.75  872.74  143.29   91.74  -36.71 
1 1 1    5    2   13 0.00  627.75   14.66  616.65   14.66  307.46 -118.01  126.09   61.99 
1 1 1    5    2   14 0.00  970.15   13.81  991.16   13.81  653.55   18.70   31.14   18.70 
1 1 1    5    2   15 0.00  525.01   15.44  529.86   15.44  280.33   51.11   78.43 -128.89 
1 1 1    5    2   16 0.00  191.75   29.95  162.98   29.95  137.61  147.77  387.69  147.77 
1 1 1    5    2   17 0.00  434.27   18.08  440.55   18.08  241.67  104.88   13.45  -75.12 
1 1 1    5    2   18 0.00  537.89   17.07  538.08   17.07  312.94  110.21  113.84  -69.79 
1 1 1    5    2   19 0.00  501.74   17.60  502.60   17.60  363.77  -65.09   38.42  -65.09 
1 1 1    5    2   20 0.00  275.03   24.66  365.37   24.66   62.49   74.10  268.81 -105.90 
1 1 1    5    2   21 0.00  457.39   21.22  492.31   21.22  373.49  -58.28  185.35  -58.28 
1 1 1    5    2   22 0.00  491.45   23.86  493.08   23.86  275.50   83.36  156.98  -96.64 
1 1 1    5    2   23 0.00 1467.25   16.87 1521.88   16.87 1383.75 -177.46  398.27 -177.46 
1 1 1    5    2   24 0.00  951.15   18.65  973.77   18.65  848.20 -132.26  176.72 -132.26 
1 1 1    5    2   25 0.00  695.68   23.12  670.04   23.12  616.63   -7.85  223.27   -7.85 
1 1 1    5    2   26 0.00  197.73   58.56  140.30   58.56  145.18  -54.10  446.65  -54.10 
1 1 1    5    2   27 0.00  357.43   36.50  327.60   36.50  169.80   10.74   27.74   10.74 
1 1 1    5    2   28 0.00  321.01   45.74  295.33   45.74  116.81  173.68  132.54   -6.32 
1 1 1    5    2   29 0.00  748.93   23.92  729.39   23.92  489.68  117.20  239.09  -62.80 
1 1 1    5    2   30 0.00  163.51   66.19  273.08   66.19    3.89  -55.31  162.28  124.69 
1 1 1    5    2   31 0.00  700.93   27.46  709.44   27.46  605.85  -24.58   13.41  -24.58 
1 1 1    5    2   32 0.00  254.06   64.09  259.78   64.09   15.53  109.55   10.21  -70.45 
1 1 1    5    2   33 1.00  439.08   39.61  501.64   39.61  236.04  -94.25  350.86   85.75 
1 1 1    5    2   34 0.00  252.10   74.28  105.32   74.28   29.70 -172.31  249.50 -172.31 
1 1 1    5    2   35 0.00  103.21   66.12  127.25   66.12  153.81 -105.64  398.14 -105.64 
1 1 1    5    2   36 0.00  155.82   73.09  130.19   73.09  156.66 -142.15  474.47 -142.15 
1 1 1    5    2   37 0.00  292.73   63.54  310.89   63.54  230.61 -116.02   24.23 -116.02 
1 1 1    5    2   38 0.00  122.89   71.92  138.15   71.92   21.69  -27.39   89.74  -27.39 
1 1 1    5    2   39 0.00   94.83   61.07   98.06   61.07   80.07  -33.10  259.28  -33.10 
1 1 1    5    2   40 0.00  233.26   71.76  362.93   71.76  405.74 -116.64   52.80 -116.64 
1 1 1    5    2   41 0.00   99.57   80.32  207.11   80.32   46.08  -39.61  195.42  140.39 
1 1 1    5    2   42 0.00  168.59   84.00  236.40   84.00  224.43  129.85   15.17  129.85 
1 1 1    5    2   43 0.00  146.18   80.53  178.91   80.53  116.70   85.63  149.22  -94.37 
1 1 1    5    3    1 0.00  373.06   14.76  361.70   14.76  160.57    0.23  584.00    0.23 
1 1 1    5    3    2 0.00 1053.23   16.83 1039.34   16.83  689.51  158.21  432.53  158.21 
1 1 1    5    3    3 0.00 1178.29   17.41 1219.91   17.41  647.73   50.61  136.78   50.61 
1 1 1    5    3    4 0.00  852.01   18.07  871.72   18.07  405.89  158.56    7.94  -21.44 
1 1 1    5    3    5 0.00  219.43   14.91  260.60   14.91  109.49  -65.75  352.82  -65.75 
1 1 1    5    3    6 0.00 1084.33   16.70 1108.12   16.70  457.67   15.11  304.08 -164.89 
1 1 1    5    3    7 0.00 1177.62   17.69 1226.47   17.69  505.04  173.11  426.93   -6.89 
1 1 1    5    3    8 0.00 1791.19   15.24 1792.26   15.24 1094.25   42.55    6.97 -137.45 
1 1 1    5    3    9 0.00 1911.26   15.26 1907.24   15.26 1381.09  124.06  395.29  124.06 
1 1 1    5    3   10 0.00 1494.12   15.08 1473.80   15.08  938.89   48.78    2.57 -131.22 
1 1 1    5    3   11 0.00  482.27   15.71  491.26   15.71  129.15 -139.77  268.24   40.23 
1 1 1    5    3   12 0.00 1340.44   13.74 1336.32   13.74  852.45  158.65   19.24  -21.35 
1 1 1    5    3   13 0.00 1749.99   13.88 1758.97   13.88 1391.25   36.12  424.77   36.12 
1 1 1    5    3   14 0.00  936.06   13.84  937.86   13.84  529.16  -97.80  194.62   82.20 
1 1 1    5    3   15 0.00 1809.65   13.16 1842.82   13.16 1378.96 -140.15  234.32 -140.15 
1 1 1    5    3   16 0.00  103.67   38.65  112.56   38.65   14.12   75.58   31.40   75.58 
1 1 1    5    3   17 1.00  382.95   18.13  389.42   18.13  159.17  -93.78    9.62   86.22 
1 1 1    5    3   18 0.00  177.24   31.88  230.34   31.88   69.25  170.57  312.47  170.57 
1 1 1    5    3   19 0.00  603.00   17.22  610.39   17.22  493.55   16.73  110.86   16.73 
1 1 1    5    3   20 0.00  351.72   23.67  367.04   23.67  168.81  167.85   83.29  -12.15 
1 1 1    5    3   21 0.00  484.48   22.88  491.72   22.88  270.65  -18.33  155.32  161.67 
1 1 1    5    3   22 1.00  286.33   36.03  253.65   36.03    2.41 -148.77  324.59 -148.77 
1 1 1    5    3   23 0.00  995.66   16.46  999.36   16.46  815.73 -117.09   60.27 -117.09 
1 1 1    5    3   24 0.00  845.86   18.24  857.50   18.24  814.83   26.46  296.40   26.46 
1 1 1    5    3   25 0.00  388.63   43.08  296.80   43.08  173.24   -5.40   10.39  174.60 
1 1 1    5    3   26 0.00 1578.08   16.29 1558.26   16.29 1081.31 -112.35  373.48   67.65 
1 1 1    5    3   27 0.00  619.52   27.62  581.54   27.62  616.35  118.64  375.56  118.64 
1 1 1    5    3   28 0.00  508.60   34.10  403.80   34.10  373.34   81.98  115.95   81.98 
1 1 1    5    3   29 0.00  318.21   50.84  293.60   50.84  108.27  111.79  186.25  -68.21 
1 1 1    5    3   30 0.00  694.10   27.20  608.87   27.20  581.31  -60.91   91.48  -60.91 
1 1 1    5    3   31 0.00  551.87   29.48  590.77   29.48  377.75   42.85  209.96 -137.15 
1 1 1    5    3   32 0.00  160.55   66.65   75.05   66.65  108.44   14.12  278.66   14.12 
1 1 1    5    3   33 0.00  740.79   28.44  670.67   28.44  768.30 -116.35  274.89 -116.35 
1 1 1    5    3   34 0.00  108.01   68.27  129.73   68.27  162.43  104.42  424.40  104.42 
1 1 1    5    3   35 0.00  664.56   30.98  594.45   30.98  706.47  -25.79  231.69  -25.79 
1 1 1    5    3   36 0.00   81.14   70.08  167.15   70.08   82.10   92.69  241.56   92.69 
1 1 1    5    3   37 0.00  222.48   77.07  129.96   77.07   15.74   89.88  216.36   89.88 
1 1 1    5    3   38 0.00  251.42   74.28  224.16   74.28   60.85  -15.26   29.67  -15.26 
1 1 1    5    3   39 0.00  182.51   78.53  181.49   78.53   97.59 -113.05  184.41   66.95 
1 1 1    5    3   40 0.00  242.52   76.10  269.06   76.10  255.86  -17.00  142.55  163.00 
1 1 1    5    3   41 0.00  232.00   85.35  168.34   85.35   91.81   48.84  327.69 -131.16 
1 1 1    5    3   42 0.00  113.51   65.55  104.27   65.55   45.51  -94.66  229.57  -94.66 
1 1 1    5    3   43 0.00  141.83   73.16  120.38   73.16   22.67  -21.23  206.66  158.77 
1 1 1    5    3   45 0.00   83.13   48.29   83.13   48.29    9.75  158.82   79.49  158.82 
1 1 1    5    3   46 0.00   77.56   45.11   77.56   45.11   34.73  154.60  158.39  154.60 
1 1 1    5    4    1 0.00  772.45   13.98  751.68   13.98  266.60  157.63  166.95  -22.37 
1 1 1    5    4    2 0.00 1054.68   15.23 1047.95   15.23  493.97   61.37   15.15 -118.63 
1 1 1    5    4    3 0.00 1278.98   17.39 1253.98   17.39  762.39  -22.16  295.46  -22.16 
1 1 1    5    4    4 0.00 1330.95   20.15 1326.59   20.15  865.70 -163.01  293.95 -163.01 
1 1 1    5    4    5 0.00  250.90   21.17  265.76   21.17   87.50  -47.11  323.53  -47.11 
1 1 1    5    4    6 0.00 3080.43   15.32 2983.79   15.32 1660.83  143.50  168.54  -36.50 
1 1 1    5    4    7 0.00 1129.47   15.56 1143.74   15.56  635.93  -51.47   81.89  128.53 
1 1 1    5    4    8 0.00 2664.09   13.76 2603.94   13.76 1748.48   49.11  224.69   49.11 
1 1 1    5    4    9 0.00 1561.35   16.41 1566.37   16.41  936.87  -63.67  103.48  116.33 
1 1 1    5    4   10 0.00 3284.45    6.97 3258.32    6.97 2194.54   61.96  146.08   61.96 
1 1 1    5    4   11 0.00  808.90   15.27  826.58   15.27  317.50   54.72  383.97 -125.28 
1 1 1    5    4   12 0.00  505.87   16.01  492.46   16.01  224.93  -34.78   14.43  -34.78 
1 1 1    5    4   13 0.00  722.51   16.16  720.59   16.16  529.12 -100.38  219.22 -100.38 
1 1 1    5    4   14 0.00  141.94   34.15  119.97   34.15   39.45  -81.56   93.47  -81.56 
1 1 1    5    4   15 0.00 1334.81   14.82 1295.53   14.82  941.40  178.19   71.67  178.19 
1 1 1    5    4   16 0.00 1189.43   13.67 1171.36   13.67  758.26  103.53  267.02  -76.47 
1 1 1    5    4   17 1.00  528.21   16.09  546.76   16.09  293.54 -145.91  159.10   34.09 
1 1 1    5    4   18 0.00  269.43   26.57  236.18   26.57   23.11 -142.06   65.29   37.94 
1 1 1    5    4   19 0.00 1081.71   15.32 1046.60   15.32  785.14  -81.68   87.57   98.32 
1 1 1    5    4   20 0.00  804.36   17.08  791.76   17.08  538.21  -89.58  128.27   90.42 
1 1 1    5    4   21 0.00  768.14   17.39  759.33   17.39  571.91    9.59   15.16 -170.41 
1 1 1    5    4   22 0.00  835.85   17.97  866.33   17.97  505.46  175.66  317.38   -4.34 
1 1 1    5    4   23 0.00  529.70   21.07  577.73   21.07  388.57  -85.19   48.32   94.81 
1 1 1    5    4   24 0.00 1170.33   16.01 1178.97   16.01  959.01  141.38   16.59  141.38 
1 1 1    5    4   25 1.00 1438.15   16.96 1464.30   16.96 1133.13 -114.98   52.00   65.02 
1 1 1    5    4   26 0.00 1013.71   20.96  994.62   20.96  657.63 -148.14  299.00   31.86 
1 1 1    5    4   27 0.00  822.03   26.13  829.76   26.13  593.69  103.87  146.95  -76.13 
1 1 1    5    4   28 0.00  495.46   32.94  519.50   32.94  341.15  -17.29  108.52  162.71 
1 1 1    5    4   29 0.00  210.18   65.15   86.85   65.15   27.64  -83.41   98.26  -83.41 
1 1 1    5    4   30 0.00 1034.78   20.31 1071.13   20.31  857.20  -14.35  106.25  165.65 
1 1 1    5    4   31 0.00  175.35   69.97  133.50   69.97   88.36  -64.37  277.31  -64.37 
1 1 1    5    4   32 1.00  776.52   26.67  814.71   26.67  719.36 -152.26   19.46 -152.26 
1 1 1    5    4   33 0.00  365.69   48.98  330.61   48.98  192.56 -117.97  178.21   62.03 
1 1 1    5    4   34 0.00  415.68   52.97  305.17   52.97  291.04  -22.71    9.30  -22.71 
1 1 1    5    4   35 0.00  557.97   35.41  541.84   35.41  584.31 -121.18  145.80 -121.18 
1 1 1    5    4   36 0.00  593.54   33.06  549.17   33.06  696.71  -85.98  308.78  -85.98 
1 1 1    5    4   37 0.00  151.14   76.63  223.84   76.63    7.26   13.93  174.01 -166.07 
1 1 1    5    4   38 0.00  263.37   73.47  138.68   73.47   65.10   62.60  222.11 -117.40 
1 1 1    5    4   39 1.00  120.25   66.88  105.15   66.88   30.22  162.39  163.25  162.39 
1 1 1    5    4   40 0.00  191.86   80.28  163.06   80.28  111.90   74.05   43.74 -105.95 
1 1 1    5    4   41 0.00  233.36   81.51  153.31   81.51  162.94   62.11    9.38 -117.89 
1 1 1    5    4   42 0.00   92.29   55.09   77.57   55.09   69.27   52.46  204.36   52.46 
1 1 1    5    4   43 0.00   75.37   53.42   89.98   53.42   60.73   89.03  186.97   89.03 
1 1 1    5    4   44 1.00  109.25   62.91  109.25   62.91   17.77   35.39  256.98   35.39 
1 1 1    5    4   45 0.00   85.50   53.69   82.67   53.69    8.18  119.80   76.71  119.80 
1 1 1    5    4   46 0.00   82.07   52.38   84.20   52.38   21.00  108.23  135.03  108.23 
1 1 1    6    1    1 0.00  851.91   20.44  861.00   20.44  330.33  114.79  151.80  -65.21 
1 1 1    6    1    2 0.00  776.80   17.79  767.51   17.79  344.17  112.02   16.31  -67.98 
1 1 1    6    1    3 0.00 1940.92   21.78 1938.15   21.78  924.54  -40.62   64.40  139.38 
1 1 1    6    1    4 0.00 2179.10   18.56 2194.91   18.56 1285.36  171.54  399.79  171.54 
1 1 1    6    1    5 0.00  630.25   16.21  649.05   16.21  344.08 -110.45  143.05 -110.45 
1 1 1    6    1    6 0.00 1335.69   17.20 1300.56   17.20  650.79   79.28  137.14 -100.72 
1 1 1    6    1    7 0.00 1367.42   17.08 1359.52   17.08  744.80 -117.59   96.33   62.41 
1 1 1    6    1    8 0.00 1623.92   15.91 1617.32   15.91  813.83  167.11  297.48  -12.89 
1 1 1    6    1    9 0.00  686.73   15.55  680.90   15.55  380.27   95.71   30.90   95.71 
1 1 1    6    1   10 0.00  738.18   15.59  733.19   15.59  310.89   68.76  233.14 -111.24 
1 1 1    6    1   11 1.00 2309.79   12.83 2278.65   12.83 1783.63   23.21  687.27   23.21 
1 1 1    6    1   12 0.00  338.48   17.28  323.71   17.28   60.42 -110.02  419.71 -110.02 
1 1 1    6    1   13 0.00  744.53   14.86  739.21   14.86  491.95 -124.35  354.51 -124.35 
1 1 1    6    1   14 0.00  985.23   14.28 1009.08   14.28  461.51   36.28  382.98 -143.72 
1 1 1    6    1   15 0.00   96.09   37.36   91.35   37.36  132.23   86.44  285.26   86.44 
1 1 1    6    1   16 0.00  573.69   17.13  554.94   17.13  255.79  134.59  258.48  -45.41 
1 1 1    6    1   17 0.00  340.47   19.05  393.65   19.05  118.12   56.77  162.45 -123.23 
1 1 1    6    1   18 0.00  319.98   21.14  320.74   21.14   24.59   75.08  467.77   75.08 
1 1 1    6    1   19 0.00  756.11   15.67  774.69   15.67  531.69   99.40   69.12  -80.60 
1 1 1    6    1   20 0.00  407.64   20.46  437.11   20.46   93.34  -67.60  394.79  112.40 
1 1 1    6    1   21 0.00  415.63   22.24  458.94   22.24  197.40  129.71  204.00  -50.29 
1 1 1    6    1   22 1.00 1011.29   19.07 1022.79   19.07  410.96 -130.76  739.68   49.24 
1 1 1    6    1   23 0.00 1029.41   21.16 1015.86   21.16  837.47 -157.19   98.15 -157.19 
1 1 1    6    1   24 0.00  803.85   21.68  790.63   21.68  482.41  149.75  273.06  -30.25 
1 1 1    6    1   25 0.00 1198.04   16.98 1161.65   16.98  730.50  -64.67  368.37  115.33 
1 1 1    6    1   26 0.00  623.97   22.87  630.15   22.87  438.13  -23.46   65.87  156.54 
1 1 1    6    1   27 0.00  473.76   33.72  351.91   33.72  156.35  -22.11  287.63  157.89 
1 1 1    6    1   28 0.00  445.65   29.98  544.51   29.98  351.39   43.02   38.34 -136.98 
1 1 1    6    1   29 0.00  920.66   20.19  955.27   20.19  714.74   37.98  114.69 -142.02 
1 1 1    6    1   30 1.00  639.84   26.97  631.97   26.97  578.46 -120.79  139.67 -120.79 
1 1 1    6    1   31 0.00  170.84   72.56  160.65   72.56  105.86  -14.66  351.13  -14.66 
1 1 1    6    1   32 0.00  304.89   63.79  169.04   63.79   29.93  -28.33  371.64  -28.33 
1 1 1    6    1   33 0.00  675.44   30.33  649.46   30.33  648.53 -123.77  134.21 -123.77 
1 1 1    6    1   34 0.00  205.76   66.50  289.65   66.50   82.70 -145.88  141.90   34.12 
1 1 1    6    1   35 0.00  548.40   34.45  574.43   34.45  565.53  100.86  104.74  100.86 
1 1 1    6    1   36 0.00  289.05   73.52  204.78   73.52   94.45   97.73  105.91  -82.27 
1 1 1    6    1   37 0.00  272.64   72.88  245.78   72.88  135.17   51.78   97.87 -128.22 
1 1 1    6    1   38 0.00  153.27   78.99  218.67   78.99   73.40  139.14  111.12  -40.86 
1 1 1    6    1   39 1.00   89.24   61.61  102.51   61.61   62.23  165.44  204.78  165.44 
1 1 1    6    1   40 0.00  176.81   86.57  243.47   86.57  168.51   -3.87  147.70  176.13 
1 1 1    6    1   41 0.00   92.66   64.20  111.01   64.20   50.11  100.53  183.20  100.53 
1 1 1    6    1   42 0.00  108.98   83.75  220.33   83.75  114.22  103.68   63.85  -76.32 
1 1 1    6    1   43 0.00   94.96   60.91   99.92   60.91   28.38   67.60  128.90   67.60 
1 1 1    6    1   44 0.00   92.86   53.75   92.86   53.75   28.26  136.94  150.85  136.94 
1 1 1    6    1   45 0.00   92.41   53.57   92.41   53.57    2.23 -149.92  115.57   30.08 
1 1 1    6    1   46 0.00   83.34   48.49   83.34   48.49   15.21  103.66  109.84  103.66 
1 1 1    6    2    1 0.00  217.58   17.09  217.04   17.09  174.37  -14.27  473.88  -14.27 
1 1 1    6    2    2 0.00 1489.36   18.02 1492.94   18.02 1027.65   -0.86  639.28   -0.86 
1 1 1    6    2    3 0.00 1403.85   17.45 1427.47   17.45  670.97   80.74   32.12  -99.26 
1 1 1    6    2    4 0.00  899.24   16.40  887.79   16.40  479.42  164.56   46.86  164.56 
1 1 1    6    2    5 0.00  167.17   18.89  172.02   18.89   76.04   93.34  186.27   93.34 
1 1 1    6    2    6 0.00  834.77   18.52  849.00   18.52  479.09   71.64   91.00   71.64 
1 1 1    6    2    7 0.00 2481.24   16.60 2487.38   16.60 1633.02  130.96  319.39  130.96 
1 1 1    6    2    8 0.00 1191.33   17.12 1173.83   17.12  699.44   88.40   15.46   88.40 
1 1 1    6    2    9 0.00  451.12   17.25  466.00   17.25   45.99   89.45  381.51  -90.55 
1 1 1    6    2   10 0.00 1970.15   14.86 1928.52   14.86 1217.44   14.45    3.28   14.45 
1 1 1    6    2   11 0.00  359.21   16.74  337.40   16.74   31.40 -140.08  101.79   39.92 
1 1 1    6    2   12 0.00 1123.08   14.11 1121.09   14.11  663.85  168.77  104.94  -11.23 
1 1 1    6    2   13 0.00  399.13   16.42  416.00   16.42   96.92  137.71  151.67  -42.29 
1 1 1    6    2   14 0.00 1282.45   14.00 1285.87   14.00  715.72 -150.45  276.62   29.55 
1 1 1    6    2   15 0.00  613.85   16.15  603.43   16.15   55.71 -131.57  679.46   48.43 
1 1 1    6    2   16 0.00  989.01   14.17  974.11   14.17  831.89 -167.77  251.63 -167.77 
1 1 1    6    2   17 0.00  215.03   26.69  246.47   26.69   53.05   64.09  262.91   64.09 
1 1 1    6    2   18 0.00  432.43   19.72  396.39   19.72  256.29   90.15   13.60   90.15 
1 1 1    6    2   19 0.00  129.07   43.14  139.73   43.14  110.50   70.74  281.70   70.74 
1 1 1    6    2   20 0.00  290.18   26.90  297.57   26.90   44.79  132.81  241.11  -47.19 
1 1 1    6    2   21 0.00  736.02   19.64  719.48   19.64  447.60  165.19  187.91  -14.81 
1 1 1    6    2   22 0.00  481.46   23.77  512.92   23.77  242.10   -7.66  232.56  172.34 
1 1 1    6    2   23 0.00 1015.61   17.19 1025.11   17.19  869.37   48.38  156.13   48.38 
1 1 1    6    2   24 0.00  149.12   59.26  254.31   59.26   42.42   -6.06  242.42   -6.06 
1 1 1    6    2   25 0.00  643.57   22.97  615.87   22.97  457.40  -19.09   20.86  160.91 
1 1 1    6    2   26 0.00  643.66   22.53  677.56   22.53  582.09 -132.81  176.77 -132.81 
1 1 1    6    2   27 0.00  402.22   34.12  327.25   34.12  202.22   12.15   63.74   12.15 
1 1 1    6    2   28 0.00  288.73   50.49  222.25   50.49   47.03   72.31   48.03 -107.69 
1 1 1    6    2   29 1.00  489.99   30.72  485.69   30.72  392.95  145.98   52.17  145.98 
1 1 1    6    2   30 0.00  759.93   24.77  748.07   24.77  581.47 -124.54   94.55   55.46 
1 1 1    6    2   31 0.00  592.63   33.16  564.18   33.16  596.69   43.32  278.07   43.32 
1 1 1    6    2   32 0.00  539.32   32.30  539.38   32.30  359.13  176.64  199.51   -3.36 
1 1 1    6    2   33 0.00  656.27   31.26  647.73   31.26  770.60  118.09  418.61  118.09 
1 1 1    6    2   34 0.00  446.83   42.68  448.10   42.68  376.47   73.37   22.54 -106.63 
1 1 1    6    2   35 0.00  290.55   67.61  262.35   67.61  117.09  -36.43  187.67  143.57 
1 1 1    6    2   36 1.00  205.97   68.01  325.39   68.01   62.04  -47.07  309.30  132.93 
1 1 1    6    2   37 0.00  250.94   75.88  217.63   75.88   60.96  -19.35   22.77  160.65 
1 1 1    6    2   38 0.00  241.52   72.59  285.88   72.59  234.02  -85.88    2.74  -85.88 
1 1 1    6    2   39 0.00  180.51   80.91  217.79   80.91  158.97   16.14   18.60   16.14 
1 1 1    6    2   40 0.00  160.02   81.46  277.56   81.46  227.40 -161.42   25.77   18.58 
1 1 1    6    2   41 0.00   95.93   68.89  138.10   68.89   21.96 -118.62  152.28 -118.62 
1 1 1    6    2   42 0.00  325.53   83.52  185.47   83.52  399.95  -82.12  157.57  -82.12 
1 1 1    6    2   43 0.00  121.25   65.85  101.70   65.85    8.55  -99.12  126.75  -99.12 
1 1 1    6    2   44 0.00  109.20   62.83  109.20   62.83   16.20 -115.88  248.12 -115.88 
1 1 1    6    2   45 0.00   76.20   44.34   76.20   44.34   48.98  -46.64  205.40  -46.64 
1 1 1    6    2   46 1.00   82.78   48.17   82.78   48.17   30.54 -105.90  182.78 -105.90 
1 1 1    6    3    1 0.00 1025.08   16.35 1024.93   16.35  693.53   -6.02  545.76   -6.02 
1 1 1    6    3    2 0.00 1133.64   16.74 1164.08   16.74  496.07   34.97  102.39 -145.03 
1 1 1    6    3    3 0.00 1255.22   17.00 1307.63   17.00  883.17  -34.79  567.28  -34.79 
1 1 1    6    3    4 0.00 1514.50   18.16 1494.03   18.16  544.44  -81.70  533.69   98.30 
1 1 1    6    3    5 0.00  200.82   16.67  185.42   16.67  178.85   19.14  458.46   19.14 
1 1 1    6    3    6 0.00 3052.60   15.26 3064.08   15.26 1813.22   74.02   21.03   74.02 
1 1 1    6    3    7 0.00 1230.17   17.72 1210.93   17.72  703.71  -35.47   12.42  144.53 
1 1 1    6    3    8 1.00 1639.29   17.97 1663.97   17.97 1193.58   10.44  419.61   10.44 
1 1 1    6    3    9 0.00 1479.61   17.48 1503.53   17.48  911.42  -36.00    8.56  144.00 
1 1 1    6    3   10 0.00 2033.30   14.03 2125.80   14.03 1369.64   63.68  128.37   63.68 
1 1 1    6    3   11 0.00  579.04   16.28  593.26   16.28  177.33   30.14  317.28 -149.86 
1 1 1    6    3   12 0.00  853.75   15.91  874.75   15.91  457.86  -32.90  168.52  147.10 
1 1 1    6    3   13 0.00 1411.63   13.96 1406.88   13.96  892.24  148.42   69.53  -31.58 
1 1 1    6    3   14 0.00  749.83   15.09  723.23   15.09  522.03   45.45  117.78   45.45 
1 1 1    6    3   15 0.00 1029.89   16.20 1016.81   16.20  683.20  136.04    3.41  136.04 
1 1 1    6    3   16 0.00   82.18   40.53   87.63   40.53   24.46 -140.49   52.04 -140.49 
1 1 1    6    3   17 0.00  841.48   15.62  859.59   15.62  710.38   58.09  194.81   58.09 
1 1 1    6    3   18 0.00  276.77   23.05  297.11   23.05   67.71   36.77  127.20 -143.23 
1 1 1    6    3   19 0.00 1172.69   14.14 1198.49   14.14  850.03   92.22  123.66  -87.78 
1 1 1    6    3   20 0.00  825.11   17.79  847.04   17.79  609.11 -103.56   23.79   76.44 
1 1 1    6    3   21 0.00  469.50   21.92  496.43   21.92  279.19 -103.85  118.35   76.15 
1 1 1    6    3   22 0.00  940.88   18.19  954.48   18.19 1016.74   65.58  609.90   65.58 
1 1 1    6    3   23 0.00  369.66   30.67  328.47   30.67  112.31 -133.67  237.34   46.33 
1 1 1    6    3   24 0.00  965.48   18.95  942.09   18.95  785.15 -129.25   63.68 -129.25 
1 1 1    6    3   25 0.00  331.49   46.59  255.87   46.59   89.04  121.66  130.64  -58.34 
1 1 1    6    3   26 0.00  715.81   21.56  711.50   21.56  369.57  -89.26  375.85   90.74 
1 1 1    6    3   27 0.00  630.82   24.02  658.47   24.02  535.62  157.74   77.27  157.74 
1 1 1    6    3   28 0.00  129.53   65.70  180.64   65.70   45.02  153.72  150.84  153.72 
1 1 1    6    3   29 0.00  145.97   68.74  149.02   68.74   82.02  -20.84  244.19  -20.84 
1 1 1    6    3   30 0.00  359.63   47.11  327.20   47.11   63.11  -64.11  394.53  115.89 
1 1 1    6    3   31 0.00  529.23   32.39  520.22   32.39  327.09  115.23  220.11  -64.77 
1 1 1    6    3   32 0.00  205.35   69.80  258.51   69.80    9.90  -77.06  301.67  -77.06 
1 1 1    6    3   33 0.00  432.07   37.00  501.02   37.00  443.04   14.73  113.88   14.73 
1 1 1    6    3   34 0.00  425.33   44.68  423.30   44.68  300.17 -103.39  144.67   76.61 
1 1 1    6    3   35 1.00  393.28   52.57  352.87   52.57  254.35 -100.47  145.16   79.53 
1 1 1    6    3   36 0.00  178.97   74.12  277.60   74.12   46.29  -48.48   36.75  131.52 
1 1 1    6    3   37 0.00  227.31   76.11  178.78   76.11    9.75 -156.46  253.87   23.54 
1 1 1    6    3   38 1.00  282.13   75.09  235.45   75.09  198.81  138.07  100.65  138.07 
1 1 1    6    3   39 0.00  225.23   80.04  199.27   80.04  197.37  172.36   49.05  172.36 
1 1 1    6    3   40 0.00  196.71   80.17  232.57   80.17  220.01  -85.03   23.70   94.97 
1 1 1    6    3   41 0.00  239.41   79.53  108.97   79.53  116.69  -19.18  104.95  160.82 
1 1 1    6    3   42 0.00   88.98   62.61  113.96   62.61   20.70 -167.85  115.29 -167.85 
1 1 1    6    3   43 0.00  110.88   75.29  162.55   75.29   52.01   60.20  111.71 -119.80 
1 1 1    6    3   44 0.00   86.88   50.47   86.88   50.47   18.42   90.62   79.02   90.62 
1 1 1    6    3   45 0.00   85.39   49.56   85.39   49.56   19.32  103.84  160.36  103.84 
1 1 1    6    3   46 0.00   75.52   43.93   75.52   43.93   64.67  122.94  249.18  122.94 
1 1 1    6    4    1 0.00  360.87   14.04  374.89   14.04   76.62  150.38  446.85  150.38 
1 1 1    6    4    2 0.00 1178.48   15.73 1190.53   15.73  551.74  162.95  131.60  -17.05 
1 1 1    6    4    3 0.00  511.80   16.27  516.94   16.27   48.98  137.39  395.73  -42.61 
1 1 1    6    4    4 0.00 1590.34   19.40 1633.81   19.40  833.23   37.42   75.85 -142.58 
1 1 1    6    4    5 0.00 1652.22   19.83 1690.27   19.83  802.80   65.20  230.80 -114.80 
1 1 1    6    4    6 0.00 2316.40   19.68 2329.91   19.68 1253.32   26.20  236.71 -153.80 
1 1 1    6    4    7 0.00  237.53   19.45  236.37   19.45   88.93  -55.61  292.56  -55.61 
1 1 1    6    4    8 0.00  509.77   17.49  522.18   17.49  129.17 -142.82  281.90   37.18 
1 1 1    6    4    9 1.00 1986.56   15.95 1971.10   15.95 1091.65  -15.88  284.62  164.12 
1 1 1    6    4   10 0.00  591.07   16.61  611.75   16.61  246.77   45.97  180.12 -134.03 
1 1 1    6    4   11 0.00 1933.74   14.61 1893.67   14.61 1068.10  -41.98  307.46  138.02 
1 1 1    6    4   12 0.00  416.37   17.15  412.56   17.15  109.23  114.54  118.51  -65.46 
1 1 1    6    4   13 0.00  907.11   15.79  901.81   15.79  725.21 -161.41  341.26 -161.41 
1 1 1    6    4   14 0.00 1456.77   14.82 1452.40   14.82 1054.07   60.51  151.40   60.51 
1 1 1    6    4   15 0.00  356.11   18.88  338.26   18.88   74.15    3.76   22.79 -176.24 
1 1 1    6    4   16 0.00  412.16   17.81  421.24   17.81  155.27  115.94  207.98  -64.06 
1 1 1    6    4   17 0.00  574.21   17.73  582.25   17.73  412.32  -24.67   47.85  -24.67 
1 1 1    6    4   18 0.00  167.82   34.72  207.74   34.72   59.63 -153.85  237.60 -153.85 
1 1 1    6    4   19 0.00  670.02   17.83  661.03   17.83  329.66 -138.34  341.04   41.66 
1 1 1    6    4   20 0.00 1070.75   16.51 1021.53   16.51  886.46  -92.34  195.19  -92.34 
1 1 1    6    4   21 0.00 1133.67   16.54 1137.27   16.54 1127.32   87.26  522.37   87.26 
1 1 1    6    4   22 0.00  180.29   43.03  202.94   43.03   89.37 -155.67  344.11 -155.67 
1 1 1    6    4   23 0.00  367.98   26.02  402.28   26.02  221.27  -60.88   44.34  119.12 
1 1 1    6    4   24 0.00  603.16   21.84  593.58   21.84  440.96  159.93   25.71  -20.07 
1 1 1    6    4   25 0.00  791.22   20.99  791.89   20.99  633.10  170.36   48.97  170.36 
1 1 1    6    4   26 0.00  621.94   27.20  585.07   27.20  520.39    1.79  141.82    1.79 
1 1 1    6    4   27 0.00  817.41   21.26  835.38   21.26  661.05 -176.79    0.28 -176.79 
1 1 1    6    4   28 0.00  677.80   24.84  681.52   24.84  610.62   43.69  140.10   43.69 
1 1 1    6    4   29 0.00  333.47   43.55  382.49   43.55   66.74 -153.56  413.16   26.44 
1 1 1    6    4   30 0.00  412.23   40.96  367.25   40.96  282.88    2.81   78.17    2.81 
1 1 1    6    4   31 0.00  405.59   39.11  504.81   39.11  411.79   36.49  229.37   36.49 
1 1 1    6    4   32 0.00  381.67   52.40  257.30   52.40  165.18  -28.34  106.07  151.66 
1 1 1    6    4   33 0.00  582.08   33.88  580.39   33.88  661.75 -161.83  326.04 -161.83 
1 1 1    6    4   34 0.00  568.02   32.45  608.56   32.45  532.94  156.78   18.28  -23.22 
1 1 1    6    4   35 0.00  230.04   76.65  112.55   76.65    5.49  130.62  104.32  130.62 
1 1 1    6    4   36 0.00  557.14   38.31  507.66   38.31  571.20 -135.09  124.66 -135.09 
1 1 1    6    4   37 0.00  388.48   50.04  368.53   50.04  322.64  -88.30   94.31   91.70 
1 1 1    6    4   38 0.00   96.30   69.37  149.46   69.37   16.14   -9.42  102.94   -9.42 
1 1 1    6    4   39 0.00  240.40   79.16  161.49   79.16   82.72  -33.53  313.74  146.47 
1 1 1    6    4   40 0.00  204.90   79.65  205.67   79.65  160.00  -56.79  153.43  123.21 
1 1 1    6    4   41 0.00  112.78   69.12  126.04   69.12   33.81 -153.97  214.57 -153.97 
1 1 1    6    4   42 0.00  113.66   60.85   82.48   60.85   53.21 -154.45  228.51 -154.45 
1 1 1    6    4   43 0.00   69.40   57.44  109.18   57.44   72.92 -112.14  255.83 -112.14 
1 1 1    6    4   44 0.00  103.14   63.38   99.44   63.38    8.76   44.82  118.65   44.82 
1 1 1    6    4   45 0.00   92.46   55.14   81.04   55.14   21.64   -5.84  188.89   -5.84 
1 1 1    6    4   46 0.00   84.64   52.32   81.51   52.32   14.34  -40.49   97.66  -40.49 
1 1 1    6    5    1 0.00 2575.22   12.19 2563.46   12.19 1392.18  114.10   49.52  114.10 
1 1 1    6    5    2 0.00  190.69   17.03  174.72   17.03  112.59  -76.62  285.52  -76.62 
1 1 1    6    5    3 0.00 1271.76   15.31 1265.09   15.31  724.51   25.76  110.43   25.76 
1 1 1    6    5    5 0.00 2519.11   19.64 2538.53   19.64 1512.96  -67.61   67.34  -67.61 
1 1 1    6    5    6 0.00 1043.24   20.68 1019.46   20.68  701.81   54.84  243.88   54.84 
1 1 1    6    5    7 0.00 2212.06   18.47 2209.81   18.47 1409.70 -103.00  164.88 -103.00 
1 1 1    6    5    8 0.00 3095.51   11.15 3069.87   11.15 1926.77    6.36   19.72    6.36 
1 1 1    6    5    9 0.00 1093.14   15.94 1111.03   15.94  549.22  113.47  250.32  -66.53 
1 1 1    6    5   10 0.00  493.58   16.78  481.02   16.78   69.48  -99.06  397.81   80.94 
1 1 1    6    5   11 0.00 2667.96   12.77 2631.31   12.77 1734.38  -46.01   55.33  -46.01 
1 1 1    6    5   12 1.00 1704.88   14.86 1699.28   14.86 1340.87  149.34  440.36  149.34 
1 1 1    6    5   13 0.00 2483.66   12.34 2499.81   12.34 2112.84   63.94  863.23   63.94 
1 1 1    6    5   14 0.00  409.74   18.53  413.08   18.53  180.82  -82.24    5.72  -82.24 
1 1 1    6    5   15 0.00  431.02   17.43  447.28   17.43  170.48  158.01  218.23  -21.99 
1 1 1    6    5   16 0.00  807.97   15.69  816.84   15.69  478.72  -17.72  228.76  162.28 
1 1 1    6    5   17 0.00  136.98   41.54   95.65   41.54   99.15  137.24  225.62  137.24 
1 1 1    6    5   18 0.00   53.72   38.44   74.01   38.44  215.37  -19.78  450.45  -19.78 
1 1 1    6    5   19 0.00  286.75   29.82  271.00   29.82   10.78  -65.25  359.49  -65.25 
1 1 1    6    5   20 0.00  777.55   17.55  769.48   17.55  740.27   43.03  357.35   43.03 
1 1 1    6    5   21 0.00  327.75   28.44  265.53   28.44   90.05  173.40  106.61   -6.60 
1 1 1    6    5   22 1.00  300.82   29.43  304.16   29.43   97.83  -73.15  113.78  106.85 
1 1 1    6    5   23 0.00  428.33   24.98  392.96   24.98  251.50   43.22   43.07 -136.78 
1 1 1    6    5   24 0.00 1534.15   14.73 1497.33   14.73 1348.19  163.24  238.22  163.24 
1 1 1    6    5   25 0.00  637.79   21.92  659.54   21.92  477.22   13.65   29.26 -166.35 
1 1 1    6    5   26 0.00  344.74   35.23  369.23   35.23  147.21   54.58  186.45 -125.42 
1 1 1    6    5   27 0.00  203.61   68.58  119.46   68.58  187.31   28.18  540.79   28.18 
1 1 1    6    5   28 0.00  918.60   21.97  910.51   21.97  682.16  133.06  148.21  -46.94 
1 1 1    6    5   29 1.00  646.44   25.89  678.45   25.89  594.90 -102.46  115.61 -102.46 
1 1 1    6    5   30 0.00  524.92   32.44  494.00   32.44  338.14  -90.94  149.57   89.06 
1 1 1    6    5   31 0.00  248.87   62.57  264.32   62.57    4.42 -108.74  332.58   71.26 
1 1 1    6    5   32 0.00  639.03   29.86  627.09   29.86  534.48  127.44   40.33  -52.56 
1 1 1    6    5   33 0.00  344.84   45.98  517.99   45.98  378.84   42.78   44.40   42.78 
1 1 1    6    5   34 0.00  297.92   58.78  271.32   58.78  118.98 -116.85  203.00   63.15 
1 1 1    6    5   35 0.00  233.37   69.76  248.32   69.76   69.57 -165.62  186.82   14.38 
1 1 1    6    5   36 0.00  323.87   65.32  218.92   65.32  128.52  -95.09  155.87   84.91 
1 1 1    6    5   37 0.00   84.65   60.16  103.39   60.16  127.01  -55.61  319.60  -55.61 
1 1 1    6    5   38 0.00  144.60   76.97  194.34   76.97   38.49 -121.09   38.82   58.91 
1 1 1    6    5   39 0.00  195.33   80.10  192.62   80.10  125.13  -38.31   19.80  -38.31 
1 1 1    6    5   40 0.00   99.50   65.88  120.72   65.88   22.57   77.96  107.01   77.96 
1 1 1    6    5   41 0.00   93.79   64.29  120.65   64.29   67.84 -160.42  268.51 -160.42 
1 1 1    6    5   42 0.00  119.81   62.75   86.65   62.75   66.27 -162.33  302.33 -162.33 
1 1 1    6    5   43 0.00  116.39   72.90  120.34   72.90    4.37  118.16   56.42  -61.84 
1 1 1    6    5   44 0.00  116.18   68.31  106.10   68.31   11.12  139.64   91.37  -40.36 
1 1 1    6    5   45 0.00   89.61   56.05   87.83   56.05    6.74  -54.77  129.44  -54.77 
1 1 1    6    5   46 0.00   77.93   48.93   75.27   48.93   47.34  157.41  197.33  157.41 
1 1 1    7    1    1 0.00  699.70   20.05  715.07   20.05  347.40  -48.17   74.63  -48.17 
1 1 1    7    1    2 1.00  201.34   19.78  195.53   19.78  123.75 -163.27  327.95 -163.27 
1 1 1    7    1    3 0.00  374.45   16.95  364.95   16.95   43.35  122.87   72.45  -57.13 
1 1 1    7    1    4 0.00  965.55   16.44  975.79   16.44  514.70  -68.58   29.49  -68.58 
1 1 1    7    1    5 0.00 3368.25    7.49 3406.54    7.49 1936.98  -67.48  174.60  -67.48 
1 1 1    7    1    6 0.00 1172.25   17.95 1193.71   17.95  371.08   41.41  602.83 -138.59 
1 1 1    7    1    7 0.00 1962.09   18.18 2002.34   18.18 1330.65 -176.83  362.08 -176.83 
1 1 1    7    1    8 0.00  259.62   19.73  285.77   19.73  105.90  155.51  406.00  155.51 
1 1 1    7    1    9 0.00 1436.73   16.66 1424.69   16.66  975.57 -144.42  248.55 -144.42 
1 1 1    7    1   10 0.00 1696.46   15.48 1718.80   15.48 1009.72  -48.36   60.77  131.64 
1 1 1    7    1   11 0.00 1048.56   15.42 1044.63   15.42  770.36 -126.37  311.23 -126.37 
1 1 1    7    1   12 0.00  283.09   19.07  288.48   19.07   21.37  -76.52  161.74  -76.52 
1 1 1    7    1   13 0.00  509.81   16.37  496.07   16.37   78.64  -94.47  416.26   85.53 
1 1 1    7    1   14 0.00  783.69   15.50  798.97   15.50  612.39  -18.10  257.97  -18.10 
1 1 1    7    1   15 0.00  873.14   17.02  884.19   17.02  582.60   19.80   40.95   19.80 
1 1 1    7    1   16 0.00  906.61   15.19  914.36   15.19  665.17 -158.09   44.74 -158.09 
1 1 1    7    1   17 0.00  226.43   24.40  277.13   24.40  101.01 -151.09  456.77 -151.09 
1 1 1    7    1   18 0.00  603.72   16.24  623.54   16.24  435.21   41.68   12.81   41.68 
1 1 1    7    1   19 0.00  439.74   19.31  405.05   19.31  272.08  123.88   47.32  123.88 
1 1 1    7    1   20 0.00  234.35   30.49  274.19   30.49   13.43  -92.72  287.31  -92.72 
1 1 1    7    1   21 0.00  137.94   55.42  119.46   55.42  119.01   39.32  297.96   39.32 
1 1 1    7    1   22 0.00  821.34   22.58  790.10   22.58  585.80   83.77   26.97  -96.23 
1 1 1    7    1   23 0.00  654.94   24.30  691.21   24.30  420.41  -93.00  163.54   87.00 
1 1 1    7    1   24 1.00  840.14   20.16  868.08   20.16  844.24 -166.93  398.33 -166.93 
1 1 1    7    1   25 0.00 1027.74   17.55 1042.42   17.55  888.29  160.34  202.16  160.34 
1 1 1    7    1   26 0.00  605.53   23.40  615.43   23.40  396.54 -172.69  117.81    7.31 
1 1 1    7    1   27 0.00  133.46   61.77  116.32   61.77  149.52  -57.10  372.39  -57.10 
1 1 1    7    1   28 0.00  950.58   19.06  951.42   19.06  843.49 -155.79  166.02 -155.79 
1 1 1    7    1   29 0.00 1130.05   19.56 1155.39   19.56  795.24   44.33  297.75 -135.67 
1 1 1    7    1   30 0.00  309.01   58.85  264.73   58.85   35.66 -177.83  482.98 -177.83 
1 1 1    7    1   31 0.00  497.46   36.95  498.35   36.95  389.59  -56.31    7.30  123.69 
1 1 1    7    1   32 0.00  127.82   77.61  185.32   77.61   80.75 -106.37  267.57 -106.37 
1 1 1    7    1   33 0.00  344.99   63.43  319.80   63.43  190.74   78.58  118.85 -101.42 
1 1 1    7    1   34 0.00  744.60   29.44  697.30   29.44  817.55 -130.39  332.62 -130.39 
1 1 1    7    1   35 0.00   94.95   63.21  107.21   63.21   79.84  129.11  194.68  129.11 
1 1 1    7    1   36 0.00  260.49   74.36  236.44   74.36   95.23   62.75  105.64 -117.25 
1 1 1    7    1   37 0.00  274.94   65.93  333.32   65.93  231.02   76.09   50.47   76.09 
1 1 1    7    1   38 0.00  156.59   81.11  204.08   81.11   79.60  -11.48   89.76  168.52 
1 1 1    7    1   39 0.00  175.92   81.04  145.61   81.04   63.52   92.55  138.45  -87.45 
1 1 1    7    1   40 0.00  176.68   82.61  152.95   82.61   71.30 -139.02   88.65   40.98 
1 1 1    7    1   41 0.00   75.74   53.33   83.59   53.33   47.74 -166.59  126.18 -166.59 
1 1 1    7    1   42 0.00  162.59   84.21  206.99   84.21  188.86 -114.98   24.76   65.02 
1 1 1    7    1   43 0.00  107.13   66.87  119.88   66.87   53.54  -97.97  331.26  -97.97 
1 1 1    7    1   44 1.00   81.66   53.26   81.95   53.26   36.24  -90.92  129.38  -90.92 
1 1 1    7    1   45 0.00   97.94   59.81   94.52   59.81    7.44  -50.11  156.35  129.89 
1 1 1    7    1   46 1.00   73.09   46.63   71.47   46.63   41.29  116.32  150.66  116.32 
1 1 1    7    2    1 1.00 2356.81   28.32 2327.24   28.32 1182.26 -173.57   62.67 -173.57 
1 1 1    7    2    2 0.00  299.32   16.98  302.91   16.98  214.55  -66.87  689.57  -66.87 
1 1 1    7    2    3 0.00 1001.37   16.86  978.62   16.86  462.65   78.62   93.46 -101.38 
1 1 1    7    2    4 0.00 1367.89   17.27 1369.27   17.27  940.61 -131.59  452.41 -131.59 
1 1 1    7    2    5 0.00  697.94   15.58  704.36   15.58  357.67 -145.51   40.51 -145.51 
1 1 1    7    2    6 0.00 2244.80   17.87 2167.02   17.87 1178.87  144.68  188.20  -35.32 
1 1 1    7    2    7 0.00 1374.88   18.22 1367.89   18.22  730.81  -23.58  116.70  156.42 
1 1 1    7    2    8 0.00 1439.65   17.93 1477.98   17.93  932.68  -21.21  167.89  -21.21 
1 1 1    7    2    9 0.00  709.79   17.09  699.05   17.09   94.04  -61.44  627.61  118.56 
1 1 1    7    2   10 0.00 1910.54   15.92 1904.31   15.92  961.11  119.12  422.38  -60.88 
1 1 1    7    2   11 0.00 1106.89   17.05 1098.10   17.05  574.37   19.21  189.54 -160.79 
1 1 1    7    2   12 0.00  765.57   16.07  785.93   16.07  504.00   87.31   98.06   87.31 
1 1 1    7    2   13 0.00  655.67   15.74  671.26   15.74  284.23   85.27  223.96  -94.73 
1 1 1    7    2   14 0.00 1835.18   13.26 1796.96   13.26 1291.53   80.67  186.77   80.67 
1 1 1    7    2   15 0.00  968.66   15.20  998.56   15.20  768.09  113.70  268.85  113.70 
1 1 1    7    2   16 0.00  341.28   21.50  361.22   21.50  108.71   23.54   90.79 -156.46 
1 1 1    7    2   17 0.00  608.82   16.47  597.90   16.47  481.45  146.37  197.78  146.37 
1 1 1    7    2   18 0.00  644.84   16.55  664.92   16.55  431.53  119.59   74.05  -60.41 
1 1 1    7    2   19 0.00  517.09   18.82  506.07   18.82  236.91   -8.30  250.78  171.70 
1 1 1    7    2   20 0.00  549.15   20.11  559.97   20.11  425.84   -6.03  104.55   -6.03 
1 1 1    7    2   21 0.00  598.93   19.84  638.20   19.84  429.36    6.05   27.70 -173.95 
1 1 1    7    2   22 1.00 1174.99   16.97 1177.04   16.97  724.64  146.84  354.02  -33.16 
1 1 1    7    2   23 0.00  309.99   34.35  424.31   34.35  188.86  -49.81   67.75  130.19 
1 1 1    7    2   24 0.00  652.85   24.20  634.73   24.20  471.10  159.53   26.21  -20.47 
1 1 1    7    2   25 0.00  361.90   35.35  417.37   35.35  237.21   20.72    1.78   20.72 
1 1 1    7    2   26 0.00  386.08   34.23  391.67   34.23  196.95  121.73   93.20  121.73 
1 1 1    7    2   27 0.00  312.18   37.85  364.85   37.85  165.71   45.32   72.07 -134.68 
1 1 1    7    2   28 0.00 1118.23   18.12 1161.54   18.12  933.77   -6.55   11.35   -6.55 
1 1 1    7    2   29 0.00  805.73   22.04  864.79   22.04  660.53   72.66   46.77 -107.34 
1 1 1    7    2   30 0.00 1087.86   18.75 1167.85   18.75 1031.45 -108.01  155.01 -108.01 
1 1 1    7    2   31 0.00  133.68   70.97  145.25   70.97  108.29  106.75  299.28  106.75 
1 1 1    7    2   32 0.00  354.17   47.87  372.84   47.87  247.98   -6.20   76.95   -6.20 
1 1 1    7    2   33 0.00  446.17   37.73  509.61   37.73  367.07 -167.76   81.51   12.24 
1 1 1    7    2   34 0.00  318.13   57.23  376.34   57.23  232.38  -74.67  119.44  -74.67 
1 1 1    7    2   35 0.00  411.53   51.93  373.24   51.93  191.59   75.30  324.76 -104.70 
1 1 1    7    2   36 0.00  275.40   60.78  343.74   60.78  220.29   37.96    8.42   37.96 
1 1 1    7    2   37 0.00  136.55   74.53  158.15   74.53   34.29   85.21  201.32   85.21 
1 1 1    7    2   38 0.00  144.99   76.79  173.20   76.79   26.13   26.40   61.84 -153.60 
1 1 1    7    2   39 0.00   99.84   66.38  119.02   66.38   50.42  -62.03  222.45  -62.03 
1 1 1    7    2   40 0.00  178.82   81.35  181.51   81.35   82.78  -37.00   13.49  143.00 
1 1 1    7    2   41 0.00   93.30   66.23  125.60   66.23   66.51    8.56  275.55    8.56 
1 1 1    7    2   42 0.00   92.28   59.53   98.27   59.53   65.90  175.91  250.55  175.91 
1 1 1    7    2   43 0.00  103.27   63.55  110.06   63.55   33.37   61.53  210.16   61.53 
1 1 1    7    2   44 0.00  103.92   60.14  103.92   60.14   24.54  151.04  232.19  151.04 
1 1 1    7    2   45 0.00   87.16   50.65   87.16   50.65   50.09  124.76  295.09  124.76 
1 1 1    7    2   46 0.00   80.48   46.78   80.48   46.78    9.18  -62.06   52.19  -62.06 
1 1 1    7    3    1 0.00 1104.31   17.04 1107.40   17.04  709.32 -116.66  300.24 -116.66 
1 1 1    7    3    2 0.00 1574.76   17.60 1581.06   17.60  855.99   89.73   56.21   89.73 
1 1 1    7    3    3 0.00  749.82   15.90  775.20   15.90  464.09  145.72  238.07  145.72 
1 1 1    7    3    4 0.00 2084.43   17.94 2131.73   17.94 1030.21  -54.07  202.66  125.93 
1 1 1    7    3    5 0.00  856.38   16.80  877.56   16.80  315.73 -107.47  318.59   72.53 
1 1 1    7    3    7 0.00  719.55   18.54  685.76   18.54  250.59  -19.13  264.52  160.87 
1 1 1    7    3    8 0.00  415.68   18.33  399.21   18.33   43.53  -79.58  282.38  100.42 
1 1 1    7    3    9 0.00 1638.44   16.90 1597.90   16.90  959.95 -164.57   39.27   15.43 
1 1 1    7    3   10 0.00 1148.47   16.49 1121.32   16.49  587.52  -69.28  194.94  110.72 
1 1 1    7    3   11 0.00  754.15   16.59  739.31   16.59  295.81  -28.13  286.68  151.87 
1 1 1    7    3   12 0.00  588.81   17.32  607.47   17.32  279.59 -109.25  116.16   70.75 
1 1 1    7    3   13 0.00  452.46   16.86  443.08   16.86   75.79   56.73  328.97 -123.27 
1 1 1    7    3   14 0.00   85.81   37.21   80.52   37.21   83.13   71.50  176.33   71.50 
1 1 1    7    3   15 0.00  475.21   16.86  487.15   16.86  220.40  -16.67  172.19  163.33 
1 1 1    7    3   16 0.00  992.93   15.92  975.05   15.92  601.98  176.55  219.59   -3.45 
1 1 1    7    3   17 0.00  431.85   18.67  434.72   18.67  233.71  -40.02    5.90  -40.02 
1 1 1    7    3   18 0.00 1651.11   13.64 1669.56   13.64 1319.72  -21.17  128.30  -21.17 
1 1 1    7    3   19 0.00  581.85   18.71  553.50   18.71  304.15    9.67  210.30 -170.33 
1 1 1    7    3   20 0.00  314.50   27.82  331.90   27.82  112.04   67.38  123.02 -112.62 
1 1 1    7    3   21 0.00  521.87   23.38  509.86   23.38  331.51   92.49   56.59  -87.51 
1 1 1    7    3   22 0.00  567.49   20.99  589.20   20.99  532.75 -129.11  294.09 -129.11 
1 1 1    7    3   23 0.00 1096.95   16.28 1094.30   16.28  985.73   40.46  274.55   40.46 
1 1 1    7    3   24 0.00  449.90   27.41  468.27   27.41  346.05  157.47   84.42  157.47 
1 1 1    7    3   25 0.00  543.02   27.81  511.26   27.81  325.24  157.00  115.26  -23.00 
1 1 1    7    3   26 0.00  939.35   19.17  927.61   19.17  874.08  -78.90  300.00  -78.90 
1 1 1    7    3   27 0.00  746.70   21.94  757.52   21.94  631.98 -101.46   89.72 -101.46 
1 1 1    7    3   28 0.00  153.83   67.33  160.41   67.33   19.90   44.05   68.26   44.05 
1 1 1    7    3   29 0.00  717.68   23.13  747.86   23.13  619.22 -169.98   49.24 -169.98 
1 1 1    7    3   30 0.00  820.43   23.26  814.64   23.26  709.53  -48.23   50.23  -48.23 
1 1 1    7    3   31 0.00  270.35   61.50  287.28   61.50   11.72   40.96  372.51 -139.04 
1 1 1    7    3   32 1.00  152.67   68.52   84.22   68.52  228.03  -24.48  560.85  -24.48 
1 1 1    7    3   33 0.00  145.68   66.66   86.18   66.66  208.87  -40.93  524.05  -40.93 
1 1 1    7    3   34 0.00  430.81   43.58  389.70   43.58  349.46   25.20    7.17   25.20 
1 1 1    7    3   35 0.00  118.56   67.91  104.54   67.91  122.30   99.67  312.97   99.67 
1 1 1    7    3   36 0.00  396.99   67.47  205.59   67.47  181.76  -55.19  117.68  124.81 
1 1 1    7    3   37 0.00  267.63   62.91  355.88   62.91  224.75  -57.90  127.34  122.10 
1 1 1    7    3   38 0.00  179.03   81.11  182.63   81.11   78.31  129.72  134.90  -50.28 
1 1 1    7    3   39 0.00  238.13   81.35  202.69   81.35  145.87  144.75   69.93  144.75 
1 1 1    7    3   40 0.00  115.96   66.82  107.30   66.82  103.44   79.44  385.79   79.44 
1 1 1    7    3   41 0.00  146.67   79.19  156.95   79.19   43.52  -80.21  156.38   99.79 
1 1 1    7    3   42 0.00  120.58   64.99   91.36   64.99    5.27 -162.00   46.92 -162.00 
1 1 1    7    3   43 0.00  115.22   66.29  115.22   66.29    0.98   21.43   46.95 -158.57 
1 1 1    7    3   44 0.00   88.78   51.55   88.78   51.55   16.63   22.87   77.48   22.87 
1 1 1    7    3   45 0.00   84.91   53.50   82.86   53.50   23.21   -7.73  164.69   -7.73 
1 1 1    7    3   46 0.00   89.28   55.73   90.82   55.73    5.48  -10.48  120.96  -10.48 
1 1 1    7    4    1 0.00  957.59   16.08 1009.66   16.08  418.66    7.48  165.35 -172.52 
1 1 1    7    4    2 0.00 2188.18   15.76 2146.94   15.76 1297.89   32.31  307.61   32.31 
1 1 1    7    4    3 0.00 4027.98    1.50 4034.20    1.50 2306.23  -89.92  293.16  -89.92 
1 1 1    7    4    5 0.00 2242.84   19.40 2267.31   19.40 1419.07 -138.68  260.33 -138.68 
1 1 1    7    4    6 0.00 1141.34   16.77 1200.02   16.77  685.37  125.49   51.48  125.49 
1 1 1    7    4    7 0.00 2141.98   17.81 2225.38   17.81 1138.25  -12.19  289.55  167.81 
1 1 1    7    4    8 0.00 1201.48   19.05 1204.82   19.05  798.66  133.66  184.77  133.66 
1 1 1    7    4    9 0.00 1188.61   17.03 1215.95   17.03  804.01  -60.54  177.63  -60.54 
1 1 1    7    4   10 0.00  489.03   18.05  482.82   18.05  188.58  168.55   52.93  -11.45 
1 1 1    7    4   11 0.00  556.94   17.52  536.15   17.52  250.55  -66.62   73.65  113.38 
1 1 1    7    4   12 0.00 1515.29   15.14 1517.78   15.14 1078.09   30.62  207.58   30.62 
1 1 1    7    4   13 0.00  291.25   20.65  282.48   20.65    1.11  -23.07  240.30  -23.07 
1 1 1    7    4   14 0.00  941.27   16.43  938.39   16.43  466.62  -18.18  293.34  161.82 
1 1 1    7    4   15 0.00 1312.05   14.74 1292.94   14.74  853.79   67.80  187.07 -112.20 
1 1 1    7    4   16 0.00  479.94   18.36  496.11   18.36  276.63   31.11   58.64 -148.89 
1 1 1    7    4   17 0.00  441.12   18.54  440.67   18.54  205.73   85.38   79.93   85.38 
1 1 1    7    4   18 0.00  404.65   20.06  449.83   20.06  262.65 -120.75   11.33   59.25 
1 1 1    7    4   19 0.00  480.07   22.01  471.19   22.01  275.37 -137.18   85.32   42.82 
1 1 1    7    4   20 0.00  797.38   17.89  837.50   17.89  660.60  -86.78  124.29  -86.78 
1 1 1    7    4   21 0.00  469.00   22.54  458.26   22.54  349.27 -163.43  126.53 -163.43 
1 1 1    7    4   22 0.00  840.20   16.83  855.74   16.83  827.84  -51.27  391.11  -51.27 
1 1 1    7    4   23 0.00  821.80   17.91  810.38   17.91  741.06   44.09  242.00   44.09 
1 1 1    7    4   24 0.00  310.89   33.38  386.94   33.38  177.89  171.60   21.95   -8.40 
1 1 1    7    4   25 1.00 1018.81   17.67 1035.93   17.67  956.56 -121.31  327.26 -121.31 
1 1 1    7    4   26 0.00  660.54   23.18  641.78   23.18  428.63  164.38  141.04  -15.62 
1 1 1    7    4   27 0.00  328.17   42.75  281.00   42.75  103.05 -138.72   12.90   41.28 
1 1 1    7    4   28 0.00  562.55   25.29  591.86   25.29  358.24  136.92  196.01  -43.08 
1 1 1    7    4   29 0.00  372.14   39.25  396.23   39.25  253.44 -160.21   97.42 -160.21 
1 1 1    7    4   30 0.00  221.87   70.05  155.40   70.05   56.65 -163.78  269.60 -163.78 
1 1 1    7    4   31 0.00   71.16   52.02   86.31   52.02  113.32   63.52  246.05   63.52 
1 1 1    7    4   32 0.00  277.85   68.62  178.11   68.62   23.54 -118.73  161.53   61.27 
1 1 1    7    4   33 0.00  721.44   29.46  722.35   29.46  754.58  -22.91  208.74  -22.91 
1 1 1    7    4   34 0.00   86.80   60.73  107.04   60.73  168.69  147.54  398.57  147.54 
1 1 1    7    4   35 0.00  238.72   72.75  242.82   72.75   82.57  117.07   96.35  -62.93 
1 1 1    7    4   36 0.00  390.00   47.72  433.55   47.72  405.03 -161.12   79.07 -161.12 
1 1 1    7    4   37 0.00  119.74   67.56  104.26   67.56   67.07  -16.69  198.61  -16.69 
1 1 1    7    4   38 0.00  413.78   56.59  344.09   56.59  558.61 -179.28  192.88 -179.28 
1 1 1    7    4   39 1.00  148.46   71.61  102.54   71.61   40.36  -18.99  283.95  -18.99 
1 1 1    7    4   40 0.00  257.56   81.32  203.32   81.32  222.84 -132.02  118.16   47.98 
1 1 1    7    4   41 0.00  165.36   71.15   77.92   71.15    0.93   59.48  101.71   59.48 
1 1 1    7    4   42 0.00   71.55   50.48   81.10   50.48   99.31  111.17  273.15  111.17 
1 1 1    7    4   43 1.00  114.73   66.89   96.95   66.89   40.78  128.33  246.66  128.33 
1 1 1    7    4   44 0.00   73.04   52.08   85.46   52.08   74.24 -136.52  242.23 -136.52 
1 1 1    7    4   45 0.00   81.22   52.38   82.38   52.38    9.15 -164.50   65.86 -164.50 
1 1 1    7    4   46 0.00   80.10   49.57   75.34   49.57   18.12  -42.22   85.41  -42.22 
1 1 1    7    5    1 0.00 1220.88   14.64 1256.08   14.64  507.66   59.08  268.25 -120.92 
1 1 1    7    5    2 0.00 1616.32   15.05 1612.15   15.05  944.60  173.99  200.24  173.99 
1 1 1    7    5    3 0.00 1379.20   16.27 1429.28   16.27 1017.48  -76.55  502.92  -76.55 
1 1 1    7    5    4 0.00 3636.83   25.03 3690.15   25.03 2135.99  152.48   94.88  152.48 
1 1 1    7    5    5 0.00 3537.05    1.52 3582.53    1.52 2151.46  111.53  195.47  111.53 
1 1 1    7    5    6 0.00 1890.19   19.50 1863.45   19.50 1219.25    4.00  269.31    4.00 
1 1 1    7    5    7 0.00  276.64   22.53  254.84   22.53   51.12  -70.32  227.77  -70.32 
1 1 1    7    5    8 0.00 1321.97   20.56 1349.68   20.56  710.93 -129.14  175.62   50.86 
1 1 1    7    5    9 0.00  661.00   18.01  680.42   18.01  380.94 -125.05   42.76 -125.05 
1 1 1    7    5   10 0.00  770.24   17.65  759.28   17.65  493.54 -157.24  132.47 -157.24 
1 1 1    7    5   11 0.00 2119.06   16.60 2153.66   16.60 1418.21  -36.21   79.83  -36.21 
1 1 1    7    5   12 0.00 1962.63   16.17 1950.52   16.17 1401.92 -113.42  256.64 -113.42 
1 1 1    7    5   13 0.00  712.27   17.65  692.96   17.65  485.36  -14.18  112.60  -14.18 
1 1 1    7    5   14 0.00  532.36   16.40  508.27   16.40    9.17 -159.62  676.05 -159.62 
1 1 1    7    5   15 0.00  936.07   16.20  927.13   16.20  607.21 -119.70  120.52   60.30 
1 1 1    7    5   16 0.00  498.01   18.31  527.87   18.31  298.59  -80.29   65.38   99.71 
1 1 1    7    5   17 0.00 1137.47   15.86 1125.66   15.86  940.24  -97.55  197.82  -97.55 
1 1 1    7    5   18 0.00  705.39   19.26  708.38   19.26  572.87  -27.21  124.25  -27.21 
1 1 1    7    5   19 0.00  629.76   19.93  631.70   19.93  455.33  -83.33   20.90  -83.33 
1 1 1    7    5   20 0.00  303.93   28.25  304.86   28.25   57.21  -13.73  244.99  166.27 
1 1 1    7    5   21 0.00  577.76   19.22  585.89   19.22  426.42 -101.23   21.07 -101.23 
1 1 1    7    5   22 0.00  654.44   18.97  641.53   18.97  309.39   13.60  358.81 -166.40 
1 1 1    7    5   23 0.00  761.50   18.46  765.18   18.46  531.93   69.17  110.31 -110.83 
1 1 1    7    5   24 0.00 1242.17   15.92 1236.98   15.92 1007.18 -135.34  100.70 -135.34 
1 1 1    7    5   25 0.00  898.18   18.63  877.40   18.63  717.67 -178.38   64.47 -178.38 
1 1 1    7    5   26 0.00  138.21   60.62  104.94   60.62   19.13   85.03   48.10   85.03 
1 1 1    7    5   27 0.00  963.57   21.42  947.03   21.42  647.40   36.45  248.15 -143.55 
1 1 1    7    5   28 0.00  632.65   26.08  592.33   26.08  339.57  139.96  304.24  -40.04 
1 1 1    7    5   29 0.00  156.25   70.66  150.63   70.66   54.68 -120.59  170.44 -120.59 
1 1 1    7    5   30 0.00  800.81   23.40  799.24   23.40  841.01  -44.14  346.68  -44.14 
1 1 1    7    5   31 0.00  318.34   58.20  227.92   58.20   51.42  156.68  510.00  156.68 
1 1 1    7    5   32 0.00  485.84   34.49  544.91   34.49  367.93 -142.51  143.54   37.49 
1 1 1    7    5   33 0.00  238.00   68.48  233.81   68.48   55.25   64.89  116.26 -115.11 
1 1 1    7    5   34 0.00  206.79   72.10  307.32   72.10  107.03 -149.97   41.62   30.03 
1 1 1    7    5   35 0.00  529.13   37.77  447.78   37.77  463.10 -150.62   23.89 -150.62 
1 1 1    7    5   36 1.00  146.60   76.88  154.80   76.88   29.26  -41.28  134.80  -41.28 
1 1 1    7    5   37 0.00  108.29   67.19  120.02   67.19   42.00 -175.79  129.26 -175.79 
1 1 1    7    5   38 0.00  173.01   78.23  149.79   78.23   36.03  163.45  141.46  -16.55 
1 1 1    7    5   39 0.00  118.11   72.70  151.34   72.70    9.65   16.09   54.69 -163.91 
1 1 1    7    5   40 0.00  222.01   82.02  227.38   82.02  247.15  -30.01    1.87  149.99 
1 1 1    7    5   41 0.00  166.46   76.20  135.24   76.20   23.45  -65.19   34.50  114.81 
1 1 1    7    5   42 0.00  110.29   67.65  125.91   67.65    0.91 -122.90  135.72   57.10 
1 1 1    7    5   43 0.00  133.75   81.21  143.26   81.21    3.70   21.57  353.15 -158.43 
1 1 1    7    5   44 0.00   94.99   62.98  105.48   62.98    4.74   17.86   68.59   17.86 
1 1 1    7    5   45 0.00   91.46   56.21   86.71   56.21    0.68   40.37   66.63   40.37 
1 1 1    7    5   46 0.00   73.29   48.00   76.36   48.00   26.88   28.89  109.50   28.89 
1 1 1    7    6    1 0.00 1739.84   14.53 1756.81   14.53 1271.61   43.50  632.35   43.50 
1 1 1    7    6    2 0.00 1666.30   14.75 1679.23   14.75  723.73 -136.77  409.23   43.23 
1 1 1    7    6    3 0.00 1561.49   15.29 1573.19   15.29 1107.37  103.88  483.32  103.88 
1 1 1    7    6    4 0.00 1596.28   15.62 1617.08   15.62 1052.50  103.30  301.63  103.30 
1 1 1    7    6    5 0.00 1452.14   17.27 1451.99   17.27  739.15  -26.19  174.73  153.81 
1 1 1    7    6    6 0.00 2859.54   16.42 2975.65   16.42 1707.90   29.33    0.01 -150.67 
1 1 1    7    6    7 0.00  459.85   23.44  465.25   23.44  151.12   47.88   92.78 -132.12 
1 1 1    7    6    8 0.00 2658.58   16.55 2626.28   16.55 1712.74  170.48  201.73  170.48 
1 1 1    7    6    9 0.00  883.91   18.57  873.48   18.57  475.62 -100.33   76.29   79.67 
1 1 1    7    6   10 0.00  984.61   16.01  988.36   16.01  401.86  170.71  393.23   -9.29 
1 1 1    7    6   11 0.00 1468.79   15.77 1450.76   15.77 1009.72 -110.67  157.24 -110.67 
1 1 1    7    6   12 0.00 1835.50   15.37 1804.95   15.37 1267.25 -124.70  162.51 -124.70 
1 1 1    7    6   13 0.00  935.02   18.70  929.12   18.70  623.22  152.26   49.52  152.26 
1 1 1    7    6   14 0.00  842.36   16.79  820.19   16.79  467.91  -85.21  140.88   94.79 
1 1 1    7    6   15 0.00  695.75   16.79  666.22   16.79  512.31    7.18  100.72    7.18 
1 1 1    7    6   16 0.00  196.49   28.72  239.75   28.72   27.32 -156.10  129.53 -156.10 
1 1 1    7    6   17 0.00  310.61   25.35  322.66   25.35  111.50  -38.26   61.88  141.74 
1 1 1    7    6   18 0.00   71.55   42.08   71.74   42.08  101.99   62.26  215.89   62.26 
1 1 1    7    6   19 0.00  908.23   16.42  919.66   16.42  709.31 -122.69   73.54 -122.69 
1 1 1    7    6   20 0.00   89.38   47.26   93.73   47.26  203.48  107.74  448.46  107.74 
1 1 1    7    6   21 0.00  538.90   21.47  500.33   21.47  294.37  -58.11  155.17  121.89 
1 1 1    7    6   22 0.00 1305.12   16.12 1324.26   16.12 1231.37  -32.06  418.90  -32.06 
1 1 1    7    6   23 0.00  920.50   17.52  867.49   17.52  778.14 -107.67  172.15 -107.67 
1 1 1    7    6   24 0.00 1059.34   17.98 1024.60   17.98  811.09   76.15   17.95   76.15 
1 1 1    7    6   25 0.00  636.92   21.86  594.51   21.86  250.87   77.66  439.85 -102.34 
1 1 1    7    6   26 0.00  719.42   21.87  678.73   21.87  757.81    5.75  499.42    5.75 
1 1 1    7    6   27 0.00 1328.62   18.16 1239.82   18.16 1204.50  117.40  317.32  117.40 
1 1 1    7    6   28 0.00 1019.54   22.42 1031.83   22.42  903.90 -127.80  115.29 -127.80 
1 1 1    7    6   29 0.00  899.26   21.41  871.36   21.41  806.64  -79.82  138.00  -79.82 
1 1 1    7    6   30 0.00  697.86   26.18  628.12   26.18  632.80  -27.41  169.70  -27.41 
1 1 1    7    6   31 0.00  416.31   37.04  460.09   37.04  316.85 -103.33   62.44   76.67 
1 1 1    7    6   32 0.00  537.50   31.76  551.76   31.76  502.09 -116.68   84.74 -116.68 
1 1 1    7    6   33 0.00  320.19   53.62  284.76   53.62  175.00  102.27   47.87  -77.73 
1 1 1    7    6   34 0.00   77.66   66.45  153.54   66.45   51.69   63.60  143.72   63.60 
1 1 1    7    6   35 0.00  128.92   71.58  144.12   71.58   90.86  -87.59  280.32  -87.59 
1 1 1    7    6   36 0.00  251.17   73.00  152.57   73.00   35.32  -92.95   78.26   87.05 
1 1 1    7    6   37 0.00  150.91   76.47  164.44   76.47    0.14  123.40   46.32  123.40 
1 1 1    7    6   38 0.00  345.32   63.71  307.46   63.71  482.57   -8.47  292.01   -8.47 
1 1 1    7    6   39 0.00  206.62   79.83  155.97   79.83  124.69  -95.80   68.29   84.20 
1 1 1    7    6   40 0.00  116.92   67.60  113.15   67.60   54.69   -2.80  256.57   -2.80 
1 1 1    7    6   41 0.00  236.28   80.59  173.06   80.59  220.14 -134.18   53.89 -134.18 
1 1 1    7    6   42 0.00  131.84   75.74  158.47   75.74   23.11  -17.79  310.13  162.21 
1 1 1    7    6   43 0.00  130.63   73.23  105.79   73.23    7.67 -121.93  125.40   58.07 
1 1 1    7    6   44 0.00   92.02   60.99  100.96   60.99    7.78   26.29  175.24   26.29 
1 1 1    7    6   45 0.00   86.94   54.34   84.01   54.34    7.10  173.64   83.92  173.64 
1 1 1    7    6   46 0.00   69.86   44.79   68.13   44.79   35.54   46.84  119.07   46.84 
1 1 1    8    1    1 1.00 1621.95   24.17 1609.39   24.17  990.08 -167.06  245.67 -167.06 
1 1 1    8    1    2 0.00 1451.78   22.48 1444.69   22.48  719.56   84.97  102.07  -95.03 
1 1 1    8    1    3 0.00 1392.50   21.23 1378.73   21.23  734.49 -179.95    5.31 -179.95 
1 1 1    8    1    4 0.00  965.96   16.91  988.42   16.91  400.80   34.81  213.21 -145.19 
1 1 1    8    1    5 0.00 1071.74   16.83 1070.69   16.83  558.58 -111.48   60.50   68.52 
1 1 1    8    1    6 0.00 2461.29   18.43 2412.11   18.43 1378.95  150.87   31.69  -29.13 
1 1 1    8    1    7 0.00  326.07   17.53  333.48   17.53    1.67 -178.48  198.96    1.52 
1 1 1    8    1    8 0.00 2782.42   14.88 2797.87   14.88 1770.35   38.44  227.43   38.44 
1 1 1    8    1    9 0.00 1624.12   18.96 1645.63   18.96  994.91  165.63   50.66  165.63 
1 1 1    8    1   10 0.00 1275.56   16.08 1256.73   16.08  657.37  176.86  190.86   -3.14 
1 1 1    8    1   11 0.00 1586.80   15.70 1599.51   15.70 1066.86   18.61  158.44   18.61 
1 1 1    8    1   12 0.00  788.14   15.87  791.35   15.87  535.15   11.31  168.25   11.31 
1 1 1    8    1   13 0.00 1626.70   14.27 1634.62   14.27 1254.58 -171.48  431.37 -171.48 
1 1 1    8    1   14 0.00  643.09   17.20  643.07   17.20  444.66  -62.47  324.92  -62.47 
1 1 1    8    1   15 1.00   99.02   38.83  148.25   38.83  270.94  -67.31  619.04  -67.31 
1 1 1    8    1   16 0.00  481.10   17.86  478.85   17.86  294.83   81.32   64.22   81.32 
1 1 1    8    1   17 0.00  363.38   21.88  371.49   21.88  114.71 -169.30   15.06   10.70 
1 1 1    8    1   18 0.00  717.77   16.17  723.69   16.17  675.85   -8.33  369.57   -8.33 
1 1 1    8    1   19 0.00  669.55   16.82  674.27   16.82  541.07  -37.56  167.48  -37.56 
1 1 1    8    1   20 0.00  823.98   17.61  826.86   17.61  713.94 -162.12  259.21 -162.12 
1 1 1    8    1   21 0.00  845.30   20.20  875.39   20.20  579.93 -169.31   98.87   10.69 
1 1 1    8    1   22 0.00  437.89   30.63  435.91   30.63  122.43  165.68  364.06  -14.32 
1 1 1    8    1   23 0.00  426.69   27.73  455.99   27.73  300.15  175.95  158.02  175.95 
1 1 1    8    1   24 0.00  221.54   52.76  208.42   52.76    3.73   38.76   86.70   38.76 
1 1 1    8    1   25 0.00  791.71   20.12  793.33   20.12  531.39 -106.74  121.38   73.26 
1 1 1    8    1   26 0.00  948.56   18.73  981.39   18.73  849.33   67.57  225.65   67.57 
1 1 1    8    1   27 0.00 1079.35   17.95 1092.27   17.95  907.39   74.98  111.04   74.98 
1 1 1    8    1   28 0.00  856.60   20.46  843.53   20.46  735.31  -69.55  129.34  -69.55 
1 1 1    8    1   29 0.00  989.27   19.61  971.82   19.61  744.85  144.90  108.04  -35.10 
1 1 1    8    1   30 0.00  290.70   59.59  237.67   59.59   62.40  164.77  126.58  -15.23 
1 1 1    8    1   31 0.00  593.06   29.68  560.76   29.68  512.03  -26.01   98.55  -26.01 
1 1 1    8    1   32 0.00  564.23   33.49  553.10   33.49  612.35 -172.68  417.25 -172.68 
1 1 1    8    1   33 0.00  343.20   50.29  376.62   50.29  266.98  137.97    9.19  137.97 
1 1 1    8    1   34 0.00  197.25   76.76  259.88   76.76   33.04  -78.03  225.07  101.97 
1 1 1    8    1   35 0.00  308.69   56.53  346.26   56.53  233.74  175.81   35.29   -4.19 
1 1 1    8    1   36 0.00  238.64   64.82  334.07   64.82  100.82  164.62  271.64  -15.38 
1 1 1    8    1   37 0.00  168.51   77.78  181.38   77.78   17.08  -80.44  112.54   99.56 
1 1 1    8    1   38 0.00  380.29   63.74  231.96   63.74  403.83   -2.59  147.89   -2.59 
1 1 1    8    1   39 0.00  226.64   78.66  148.50   78.66  119.25  100.15  144.82  -79.85 
1 1 1    8    1   40 0.00  104.33   71.31  147.68   71.31    3.21  -38.48   94.74  -38.48 
1 1 1    8    1   41 0.00  105.69   73.01  155.13   73.01    2.05  174.48   20.59   -5.52 
1 1 1    8    1   42 0.00  150.44   83.45  210.09   83.45  126.27 -133.90   33.21 -133.90 
1 1 1    8    1   43 0.00  110.82   68.59  109.07   68.59   57.06   15.37  326.74   15.37 
1 1 1    8    1   44 0.00  104.62   60.69   85.64   60.69   18.04 -152.01  120.65 -152.01 
1 1 1    8    1   45 0.00   84.38   57.90   99.90   57.90    3.01 -128.28   37.37   51.72 
1 1 1    8    1   46 0.00   77.74   49.28   77.07   49.28   27.02   43.28  122.25   43.28 
1 1 1    8    2    1 0.00 1809.16   25.93 1840.74   25.93  828.83   -0.74  290.14  179.26 
1 1 1    8    2    2 0.00  958.05   18.70  967.27   18.70  588.13   70.84  214.96   70.84 
1 1 1    8    2    3 1.00 2663.14   23.65 2628.25   23.65 1215.39   21.74  395.37 -158.26 
1 1 1    8    2    4 0.00 2194.63   18.99 2131.07   18.99 1149.80   35.27  130.29 -144.73 
1 1 1    8    2    5 0.00 2324.02   18.52 2353.44   18.52 1549.76  166.96  456.40  166.96 
1 1 1    8    2    6 0.00 1081.54   17.08 1084.30   17.08  549.22 -136.75  101.80   43.25 
1 1 1    8    2    7 0.00 1325.05   17.71 1339.81   17.71  579.26  132.53  359.32  -47.47 
1 1 1    8    2    8 0.00 1379.91   18.43 1369.15   18.43  740.30   23.26  125.97 -156.74 
1 1 1    8    2    9 0.00 1695.66   17.09 1733.05   17.09 1265.17 -103.76  499.25 -103.76 
1 1 1    8    2   10 0.00 1905.20   17.92 1964.72   17.92 1242.30  -13.38  146.19  -13.38 
1 1 1    8    2   11 0.00 1321.92   16.47 1327.99   16.47  893.57   52.29  155.39   52.29 
1 1 1    8    2   12 0.00  701.77   17.03  688.81   17.03  363.18  -24.60   75.81  155.40 
1 1 1    8    2   13 0.00 1588.09   15.26 1583.25   15.26 1197.19  -66.37  365.93  -66.37 
1 1 1    8    2   14 0.00  433.67   18.86  406.64   18.86  148.52  -10.13  150.19  169.87 
1 1 1    8    2   15 0.00 1255.95   16.11 1277.59   16.11  962.02  -30.82  131.96  -30.82 
1 1 1    8    2   16 0.00  556.99   17.03  569.00   17.03  420.84  114.00  180.65  114.00 
1 1 1    8    2   17 1.00 1261.18   14.44 1313.55   14.44 1043.43  -81.62  222.29  -81.62 
1 1 1    8    2   18 0.00  198.60   32.17  205.79   32.17   70.77   50.85  306.19   50.85 
1 1 1    8    2   19 0.00  700.88   17.61  690.97   17.61  630.13  177.32  322.00  177.32 
1 1 1    8    2   20 0.00  826.52   18.19  808.72   18.19  590.35 -170.34    3.01 -170.34 
1 1 1    8    2   21 0.00  722.52   21.43  728.88   21.43  411.38   -3.42  236.59  176.58 
1 1 1    8    2   22 0.00  434.96   27.13  419.48   27.13  276.39   38.66   18.58   38.66 
1 1 1    8    2   23 0.00  950.68   18.82  976.33   18.82  700.37   59.32   67.33 -120.68 
1 1 1    8    2   24 0.00  903.41   18.57  894.77   18.57  918.47  133.15  479.19  133.15 
1 1 1    8    2   25 0.00  313.50   37.56  325.29   37.56   91.16   56.99  208.27 -123.01 
1 1 1    8    2   26 0.00  499.73   29.28  456.56   29.28  333.66  -95.44    1.06   84.56 
1 1 1    8    2   27 0.00 1225.07   16.92 1253.05   16.92 1110.32 -169.11  255.57 -169.11 
1 1 1    8    2   28 0.00  258.53   58.31  200.28   58.31   16.06  -11.22   47.88  168.78 
1 1 1    8    2   29 0.00  756.54   23.11  743.89   23.11  569.42   88.80   71.38  -91.20 
1 1 1    8    2   30 0.00  907.83   20.56  973.87   20.56  791.38  -38.04   10.95  -38.04 
1 1 1    8    2   31 0.00  233.57   56.76  347.95   56.76   64.69   53.51  266.46 -126.49 
1 1 1    8    2   32 0.00   91.70   74.67  209.50   74.67   31.36  -35.84  114.47  -35.84 
1 1 1    8    2   33 0.00  303.41   62.20  239.33   62.20  115.48 -127.07   79.38   52.93 
1 1 1    8    2   34 0.00  235.39   75.09  174.54   75.09   19.74  160.48   68.97  -19.52 
1 1 1    8    2   35 0.00   77.18   53.34   81.83   53.34   37.07   81.27   82.89   81.27 
1 1 1    8    2   36 0.00  126.46   78.23  225.11   78.23    4.01  -83.27   91.52   96.73 
1 1 1    8    2   37 0.00  313.32   72.83  172.07   72.83   70.79  -14.36  281.44  165.64 
1 1 1    8    2   38 0.00  138.04   71.53  113.51   71.53   17.21   19.74  112.81   19.74 
1 1 1    8    2   39 0.00   67.19   66.63  145.42   66.63   15.10  -46.69   90.95  -46.69 
1 1 1    8    2   40 0.00  124.91   72.43  131.03   72.43   19.93  156.73  206.03  156.73 
1 1 1    8    2   41 0.00  187.83   83.27  187.37   83.27  142.44   96.54   34.33  -83.46 
1 1 1    8    2   42 0.00  178.73   83.71  188.48   83.71  159.73  156.65  148.92  -23.35 
1 1 1    8    2   43 0.00  121.10   73.87  121.77   73.87   10.10 -125.55   55.75   54.45 
1 1 1    8    2   44 0.00  105.59   63.55   97.04   63.55   12.20   -9.40  143.86   -9.40 
1 1 1    8    2   45 0.00   97.45   61.26  101.12   61.26   14.77 -175.11   51.52    4.89 
1 1 1    8    2   46 0.00   75.00   50.78   85.40   50.78   23.67  105.94  126.14  105.94 
1 1 1    8    3    1 0.00 1128.23   19.28 1139.41   19.28  428.82  173.78  318.89   -6.22 
1 1 1    8    3    2 1.00 1979.10   18.58 1956.05   18.58 1035.84  -28.11    1.88  151.89 
1 1 1    8    3    3 0.00  866.22   16.42  894.26   16.42  351.56 -170.97  188.19    9.03 
1 1 1    8    3    4 0.00 1049.68   16.63 1057.96   16.63  654.69  163.14  181.06  163.14 
1 1 1    8    3    5 0.00 1976.31   17.91 1982.36   17.91 1093.27 -116.01   44.52   63.99 
1 1 1    8    3    6 1.00 2939.61   15.96 2882.03   15.96 1668.02  126.25    0.38  126.25 
1 1 1    8    3    7 0.00 1299.78   17.47 1370.43   17.47  832.70   35.96  155.96   35.96 
1 1 1    8    3    8 0.00 2336.12   19.45 2316.89   19.45 1283.18   73.51  200.47 -106.49 
1 1 1    8    3   10 0.00 2287.72   17.47 2253.27   17.47 1437.91  111.11  112.82  111.11 
1 1 1    8    3   11 1.00  456.16   17.38  446.57   17.38  129.39  -65.85  168.74  114.15 
1 1 1    8    3   12 0.00 1427.52   16.40 1478.40   16.40  863.31  -72.48  107.45  107.52 
1 1 1    8    3   13 0.00 2049.24   17.49 1998.53   17.49 1480.33 -147.30  343.48 -147.30 
1 1 1    8    3   14 0.00  898.95   17.20  858.49   17.20  535.81 -130.26   39.42   49.74 
1 1 1    8    3   15 0.00  584.54   17.86  610.99   17.86  468.95   27.42  226.77   27.42 
1 1 1    8    3   16 0.00 1433.14   14.51 1420.08   14.51 1089.73  174.98  117.06  174.98 
1 1 1    8    3   17 0.00  968.04   15.07  975.05   15.07  652.41 -162.92  105.49   17.08 
1 1 1    8    3   18 0.00  464.89   19.62  454.49   19.62  279.44  155.73   38.91  -24.27 
1 1 1    8    3   19 0.00  545.02   19.55  568.65   19.55  300.10 -114.16  167.52   65.84 
1 1 1    8    3   20 1.00  275.03   33.97  272.92   33.97    6.49  123.16  327.17  123.16 
1 1 1    8    3   21 0.00  778.75   18.41  770.33   18.41  697.17  119.93  279.93  119.93 
1 1 1    8    3   22 0.00  790.85   18.89  769.10   18.89  648.36   61.58  146.92   61.58 
1 1 1    8    3   23 0.00  499.21   25.32  471.20   25.32  293.59   -8.06   95.89  171.94 
1 1 1    8    3   24 0.00  701.39   21.21  688.38   21.21  587.82  -16.54  174.63  -16.54 
1 1 1    8    3   25 0.00  675.50   21.56  680.38   21.56  382.72 -172.47  251.72    7.53 
1 1 1    8    3   26 0.00  769.47   21.30  763.17   21.30  636.71  128.59  106.32  128.59 
1 1 1    8    3   27 0.00  338.54   35.60  400.31   35.60   46.11  163.21  443.90  -16.79 
1 1 1    8    3   28 0.00  497.90   31.51  439.57   31.51  370.84   12.66   69.32   12.66 
1 1 1    8    3   29 0.00  991.01   19.70  994.08   19.70  826.56 -156.96   15.74 -156.96 
1 1 1    8    3   30 0.00  926.12   21.67  907.86   21.67  712.74  -45.33  118.67  134.67 
1 1 1    8    3   31 0.00  514.04   34.46  507.83   34.46  441.25 -169.83   73.86 -169.83 
1 1 1    8    3   32 0.00  498.80   37.34  457.06   37.34  321.70  -76.84  149.08  103.16 
1 1 1    8    3   33 0.00  357.04   61.01  310.86   61.01  198.99  164.93  109.00  -15.07 
1 1 1    8    3   34 0.00   82.47   66.04  137.75   66.04   58.90  -37.04  153.40  -37.04 
1 1 1    8    3   35 0.00  344.59   57.74  363.10   57.74  190.51 -138.83  238.87   41.17 
1 1 1    8    3   36 0.00  257.16   84.46  221.75   84.46   97.72 -125.06   86.42   54.94 
1 1 1    8    3   37 0.00  102.39   76.58  180.87   76.58   13.73   98.12  100.53   98.12 
1 1 1    8    3   38 0.00  126.89   70.49  122.64   70.49   34.56  137.80  185.54  137.80 
1 1 1    8    3   39 1.00  166.21   78.15  156.39   78.15    6.83  124.88  331.23  -55.12 
1 1 1    8    3   40 0.00  243.61   80.71  223.76   80.71  270.13   81.14   83.20   81.14 
1 1 1    8    3   41 0.00  112.48   72.69  151.03   72.69   33.62   12.13  305.57   12.13 
1 1 1    8    3   42 1.00   68.97   56.92  105.25   56.92  133.09   83.56  408.93   83.56 
1 1 1    8    3   43 0.00  117.89   67.85   99.44   67.85    4.53 -128.82   71.79 -128.82 
1 1 1    8    3   44 0.00   99.85   61.88   99.51   61.88   32.87 -112.14  229.15 -112.14 
1 1 1    8    3   45 0.00   94.22   60.22  101.49   60.22   13.77 -147.62   60.90   32.38 
1 1 1    8    3   46 0.00   76.10   48.88   77.83   48.88   13.00  -76.92   59.35  -76.92 
1 1 1    8    4    1 0.00 3150.88    9.03 3140.55    9.03 1635.26  -75.45   53.16  104.55 
1 1 1    8    4    2 0.00 2808.74   16.75 2845.31   16.75 1602.73  137.10   66.68  137.10 
1 1 1    8    4    3 0.00 1910.77   17.77 1980.64   17.77 1117.92  -78.34   81.44  -78.34 
1 1 1    8    4    5 0.00 1574.87   18.24 1559.85   18.24  916.55   75.81   81.03   75.81 
1 1 1    8    4    6 0.00  571.47   16.57  560.42   16.57  151.02  105.34  274.04  -74.66 
1 1 1    8    4    7 0.00 1909.67   19.62 1895.77   19.62 1092.48   57.60   44.45 -122.40 
1 1 1    8    4    8 0.00 2110.27   19.06 2131.94   19.06 1234.64 -100.87   53.49   79.13 
1 1 1    8    4    9 0.00 2435.99   18.94 2446.29   18.94 1572.27   24.22  199.21   24.22 
1 1 1    8    4   10 0.00  994.97   17.92  999.96   17.92  536.84   -0.50   99.46  179.50 
1 1 1    8    4   11 0.00 2927.34   14.14 2895.05   14.14 1925.65  -71.03  151.82  -71.03 
1 1 1    8    4   12 0.00 2372.10   17.58 2340.07   17.58 1705.50 -169.07  391.99 -169.07 
1 1 1    8    4   13 0.00  570.61   19.58  542.52   19.58  370.04 -150.81  174.86 -150.81 
1 1 1    8    4   14 0.00  131.24   36.42  129.91   36.42   59.99  -40.07  141.62  -40.07 
1 1 1    8    4   15 0.00  316.77   20.11  367.61   20.11   88.98  142.54   52.24  -37.46 
1 1 1    8    4   16 0.00  447.35   18.27  452.01   18.27  132.74  113.38  314.15  -66.62 
1 1 1    8    4   17 0.00  718.26   16.70  746.31   16.70  391.40   38.70  269.65 -141.30 
1 1 1    8    4   18 1.00  794.32   17.70  789.41   17.70  467.28  143.31  222.70  -36.69 
1 1 1    8    4   19 0.00  919.41   18.04  942.32   18.04  757.43  134.59  172.73  134.59 
1 1 1    8    4   20 0.00  828.91   17.80  795.70   17.80  571.96  129.88   39.61  -50.12 
1 1 1    8    4   21 0.00  869.24   16.86  919.34   16.86  857.84    7.07  407.74    7.07 
1 1 1    8    4   22 0.00  573.05   21.38  603.83   21.38  430.37  -52.19   18.10  -52.19 
1 1 1    8    4   23 0.00 1050.14   17.86 1024.17   17.86  945.87  -56.58  300.72  -56.58 
1 1 1    8    4   24 0.00  951.28   18.54  908.37   18.54  637.85  163.82  126.79  -16.18 
1 1 1    8    4   25 0.00  202.07   51.94  255.30   51.94   26.25  130.58  275.71  130.58 
1 1 1    8    4   26 0.00  259.61   48.31  231.61   48.31   31.56   75.19   95.75 -104.81 
1 1 1    8    4   27 0.00  607.03   26.42  620.14   26.42  511.96  100.37   97.16  100.37 
1 1 1    8    4   28 0.00  624.29   27.95  531.87   27.95  429.30   88.40   38.70  -91.60 
1 1 1    8    4   29 0.00  605.54   27.21  691.25   27.21  627.53 -153.02  238.35 -153.02 
1 1 1    8    4   30 0.00  233.52   65.08  226.52   65.08   13.72 -115.98  281.70 -115.98 
1 1 1    8    4   31 0.00  575.48   33.27  562.52   33.27  458.59 -176.61   23.89    3.39 
1 1 1    8    4   32 0.00  265.40   52.59  449.85   52.59  217.00  156.48   91.87  -23.52 
1 1 1    8    4   33 0.00  907.81   23.21  988.97   23.21  956.77 -165.86  174.64 -165.86 
1 1 1    8    4   34 1.00  181.49   78.24  178.85   78.24   45.51   86.19  279.77   86.19 
1 1 1    8    4   35 0.00  137.14   65.06   80.65   65.06  179.37 -174.92  449.92 -174.92 
1 1 1    8    4   36 0.00  199.66   76.98  279.46   76.98  100.58   96.11   81.13  -83.89 
1 1 1    8    4   37 0.00  108.61   69.10  124.05   69.10   43.88  161.37  138.71  161.37 
1 1 1    8    4   38 0.00  115.65   78.78  207.81   78.78   45.59   91.71   92.43  -88.29 
1 1 1    8    4   39 0.00  123.66   71.95  129.33   71.95   57.24 -126.75  334.57 -126.75 
1 1 1    8    4   40 0.00  298.42   76.92  218.50   76.92  350.36   77.88  104.99   77.88 
1 1 1    8    4   41 0.00  313.03   75.03  345.80   75.03  565.77 -176.03  201.73 -176.03 
1 1 1    8    4   42 0.00  141.88   74.27  129.02   74.27   39.85  149.14  149.20  -30.86 
1 1 1    8    4   43 0.00   87.27   60.37   99.24   60.37   37.33 -102.16  152.15 -102.16 
1 1 1    8    4   44 0.00  100.66   61.35   93.82   61.35    3.07   43.34  156.59   43.34 
1 1 1    8    4   45 0.00  108.79   62.96   98.44   62.96   33.56  -44.71   92.61  135.29 
1 1 1    8    4   46 0.00   75.37   49.74   81.64   49.74   19.14   17.73   94.03   17.73 
1 1 1    8    5    1 0.00 1028.93   14.51 1040.94   14.51  436.72  119.50  234.41  -60.50 
1 1 1    8    5    2 0.00  796.89   16.15  801.36   16.15  289.49  147.44  258.29  -32.56 
1 1 1    8    5    3 0.00 2659.79   14.47 2711.17   14.47 1335.68   16.63  321.74 -163.37 
1 1 1    8    5    5 0.00  557.31   17.55  560.68   17.55  252.71  -52.09    9.99  -52.09 
1 1 1    8    5    6 0.00 3418.17    8.87 3383.05    8.87 2127.92   58.63  278.83   58.63 
1 1 1    8    5    7 0.00 1381.59   20.66 1411.80   20.66  964.00 -102.68  317.91 -102.68 
1 1 1    8    5    8 0.00 3361.77   10.88 3389.44   10.88 2036.38    9.98   24.24    9.98 
1 1 1    8    5    9 0.00 1363.70   17.26 1394.01   17.26  898.39   97.05  161.79   97.05 
1 1 1    8    5   10 0.00 1204.32   17.28 1224.91   17.28  649.44 -109.72  194.34   70.28 
1 1 1    8    5   11 0.00 1080.14   17.89 1060.50   17.89  744.05 -158.83  185.38 -158.83 
1 1 1    8    5   12 0.00 1622.20   17.93 1608.08   17.93 1020.00 -129.86   29.65   50.14 
1 1 1    8    5   13 0.00 1501.57   18.05 1505.02   18.05 1181.00  117.01  424.46  117.01 
1 1 1    8    5   14 0.00  370.96   19.05  366.00   19.05   48.56  142.71  337.51  -37.29 
1 1 1    8    5   15 0.00  541.15   18.05  565.60   18.05  329.86  103.42   54.22  -76.58 
1 1 1    8    5   16 0.00  970.72   15.89 1000.06   15.89  890.89  147.76  394.95  147.76 
1 1 1    8    5   17 0.00  353.97   25.05  376.77   25.05  128.58  -96.09  195.25   83.91 
1 1 1    8    5   18 0.00  430.11   23.59  433.10   23.59  285.52  112.04   64.87  112.04 
1 1 1    8    5   19 0.00  493.39   20.88  524.12   20.88  310.03  154.55   64.05  -25.45 
1 1 1    8    5   20 0.00  669.86   19.30  712.93   19.30  622.33  -34.79  278.21  -34.79 
1 1 1    8    5   21 0.00 1058.98   16.63 1081.24   16.63  834.50  -60.16   59.21  -60.16 
1 1 1    8    5   22 0.00 1553.74   14.66 1558.78   14.66 1353.75 -114.45  306.39 -114.45 
1 1 1    8    5   23 0.00  885.11   19.42  884.62   19.42  729.43   90.50  105.44   90.50 
1 1 1    8    5   24 0.00  525.28   25.43  560.79   25.43  458.09  103.11  178.78  103.11 
1 1 1    8    5   25 0.00  650.20   21.94  650.32   21.94  663.76 -168.57  435.49 -168.57 
1 1 1    8    5   26 0.00 1242.13   17.16 1292.99   17.16 1090.30  176.36  174.55  176.36 
1 1 1    8    5   27 0.00  283.48   53.72  260.38   53.72   61.88   24.79  155.36 -155.21 
1 1 1    8    5   28 0.00  269.47   44.89  375.48   44.89  146.52   95.59  113.05  -84.41 
1 1 1    8    5   29 0.00  444.97   35.23  433.50   35.23  239.03 -159.72  192.91   20.28 
1 1 1    8    5   30 0.00  462.65   42.09  364.66   42.09  242.71 -151.29  147.67   28.71 
1 1 1    8    5   31 1.00  318.63   58.57  281.23   58.57  131.88  -38.11   24.55  141.89 
1 1 1    8    5   32 1.00  879.40   24.47  827.64   24.47  982.14  179.30  457.05  179.30 
1 1 1    8    5   33 0.00  302.39   52.62  363.93   52.62  239.66   83.08    7.66  -96.92 
1 1 1    8    5   34 0.00  434.47   44.39  461.81   44.39  338.37   60.39  122.76 -119.61 
1 1 1    8    5   35 0.00  191.68   72.71  303.25   72.71   46.12  172.99    6.43   -7.01 
1 1 1    8    5   36 0.00  476.73   38.85  550.94   38.85  543.51 -116.77   97.01 -116.77 
1 1 1    8    5   37 0.00  180.77   78.75  282.06   78.75  116.20   52.24  122.39 -127.76 
1 1 1    8    5   38 0.00  152.51   78.53  166.59   78.53   32.84  -53.94  107.01  126.06 
1 1 1    8    5   39 0.00  188.24   81.54  217.98   81.54  184.55   85.52   26.10  -94.48 
1 1 1    8    5   40 0.00  132.78   78.24  173.77   78.24   18.21 -165.23  265.81   14.77 
1 1 1    8    5   41 0.00  247.77   82.26  195.79   82.26  276.94    1.76   13.28    1.76 
1 1 1    8    5   42 1.00  144.33   74.55  138.41   74.55   56.79    3.11  143.48 -176.89 
1 1 1    8    5   43 0.00   98.37   64.38  103.82   64.38   30.34  -91.25  166.73  -91.25 
1 1 1    8    5   44 1.00   97.32   58.97   87.65   58.97   15.28  144.91  165.73  144.91 
1 1 1    8    5   45 0.00   83.45   51.11   74.70   51.11   42.50  -78.85  199.92  -78.85 
1 1 1    8    5   46 0.00   78.80   50.77   81.53   50.77   23.51   19.71  124.67   19.71 
1 1 1    8    6    1 0.00  330.57   15.04  310.85   15.04    7.37   60.32   98.21 -119.68 
1 1 1    8    6    2 0.00 1652.45   14.87 1652.19   14.87  938.78    0.65   69.62    0.65 
1 1 1    8    6    3 1.00 1531.83   15.16 1509.21   15.16  671.99   91.77  332.77  -88.23 
1 1 1    8    6    4 0.00 1641.69   17.10 1610.27   17.10  894.48 -134.02   19.22   45.98 
1 1 1    8    6    5 0.00 1087.77   16.87 1085.86   16.87  727.60   13.96  280.56   13.96 
1 1 1    8    6    6 0.00 2811.60   15.39 2907.99   15.39 1803.28 -154.13  261.87 -154.13 
1 1 1    8    6    7 0.00 3769.11   25.61 3806.47   25.61 2225.58  -13.62   47.53  166.38 
1 1 1    8    6    8 0.00  455.66   19.03  444.63   19.03   82.95   49.69  269.00 -130.31 
1 1 1    8    6    9 0.00 1053.76   17.57 1073.96   17.57  474.17  -84.34  307.47   95.66 
1 1 1    8    6   10 0.00  473.71   17.80  495.02   17.80   59.36 -112.44  410.03   67.56 
1 1 1    8    6   11 0.00  688.84   17.37  710.88   17.37  262.28 -157.15  304.89   22.85 
1 1 1    8    6   12 0.00 1405.69   19.26 1362.88   19.26  885.53  176.90    2.24  176.90 
1 1 1    8    6   13 0.00 1785.38   15.49 1789.81   15.49 1273.28  154.15  220.46  154.15 
1 1 1    8    6   14 0.00  943.12   17.34  953.33   17.34  672.04  -22.31   23.41  -22.31 
1 1 1    8    6   15 0.00  117.77   37.99  149.50   37.99   82.12  -63.47  196.15  -63.47 
1 1 1    8    6   16 0.00  789.99   17.65  813.85   17.65  576.91 -106.91   29.91 -106.91 
1 1 1    8    6   17 0.00  725.70   18.35  720.67   18.35  596.02  -19.24  172.76  -19.24 
1 1 1    8    6   18 0.00  885.56   17.77  882.19   17.77  663.65  140.41   27.58  140.41 
1 1 1    8    6   19 0.00 1091.98   17.10 1071.55   17.10  876.72  -95.12  169.26  -95.12 
1 1 1    8    6   20 0.00  174.09   37.31  266.02   37.31   32.46   26.88  255.12   26.88 
1 1 1    8    6   21 0.00 1194.40   16.73 1207.91   16.73 1297.53 -151.33  800.33 -151.33 
1 1 1    8    6   22 0.00  109.63   53.80  145.80   53.80  157.79   29.36  391.56   29.36 
1 1 1    8    6   23 0.00  129.22   51.78  230.68   51.78   40.80  106.69  174.41  106.69 
1 1 1    8    6   24 0.00 1026.86   17.61 1029.62   17.61  828.06 -131.19   92.17 -131.19 
1 1 1    8    6   25 0.00  525.07   25.90  510.45   25.90  435.63  120.74  168.48  120.74 
1 1 1    8    6   26 0.00  913.83   20.40  875.76   20.40  863.30   -1.47  340.63   -1.47 
1 1 1    8    6   27 1.00 1764.89   15.59 1719.98   15.59 1559.40   63.40  280.41   63.40 
1 1 1    8    6   28 0.00  472.64   35.72  451.74   35.72  307.55  126.98   77.92  -53.02 
1 1 1    8    6   29 0.00  909.59   22.95  864.51   22.95  957.57 -145.97  464.73 -145.97 
1 1 1    8    6   30 0.00  307.17   48.44  317.34   48.44  113.40  153.29  199.19  -26.71 
1 1 1    8    6   31 0.00  491.32   35.73  461.85   35.73  360.96   98.93   47.68  -81.07 
1 1 1    8    6   32 1.00  291.33   57.53  291.45   57.53  142.00  -73.38  101.66  106.62 
1 1 1    8    6   33 0.00  164.61   69.64  102.96   69.64   53.84  -83.09  170.90  -83.09 
1 1 1    8    6   34 0.00  327.76   61.40  265.23   61.40  146.71 -117.73  171.15   62.27 
1 1 1    8    6   35 0.00  189.34   80.17  230.53   80.17   82.35   95.32  489.61   95.32 
1 1 1    8    6   36 0.00  112.63   64.51   99.83   64.51   11.00   64.59   28.50   64.59 
1 1 1    8    6   37 0.00  320.28   69.27  268.00   69.27  217.72 -146.59   99.46   33.41 
1 1 1    8    6   38 0.00  142.96   79.31  182.44   79.31   67.44   29.10   55.68 -150.90 
1 1 1    8    6   39 0.00   88.92   64.42  118.74   64.42   50.34 -168.91  198.08 -168.91 
1 1 1    8    6   40 0.00  149.47   72.25  113.64   72.25   37.98  129.59  306.32  129.59 
1 1 1    8    6   41 0.00   80.94   53.28   81.42   53.28   16.34  129.78   46.30  129.78 
1 1 1    8    6   42 0.00  196.15   82.12  194.53   82.12  228.35 -170.85   56.05 -170.85 
1 1 1    8    6   43 0.00   91.11   54.83   73.97   54.83  130.65  132.31  388.54  132.31 
1 1 1    8    6   44 0.00   97.72   63.05  103.77   63.05    5.65 -122.32   34.10   57.68 
1 1 1    8    6   45 0.00   75.89   51.89   85.45   51.89   23.60  -16.25  132.89  -16.25 
1 1 1    8    7    1 0.00 2310.12   13.37 2328.30   13.37 1271.77   13.29    5.43 -166.71 
1 1 1    8    7    2 0.00  425.41   14.70  449.24   14.70   95.44    0.86  168.80 -179.14 
1 1 1    8    7    3 0.00  807.53   15.17  780.95   15.17  195.16   90.57  456.10  -89.43 
1 1 1    8    7    4 0.00 1670.83   15.30 1629.43   15.30  988.39  -44.64  110.38  -44.64 
1 1 1    8    7    5 0.00 2934.80   12.01 2957.96   12.01 1819.49 -179.25  226.60 -179.25 
1 1 1    8    7    6 0.00  434.55   18.12  451.89   18.12   18.11   32.13  402.25 -147.87 
1 1 1    8    7    7 0.00 2944.82   12.78 2940.49   12.78 1850.00    9.29  208.33    9.29 
1 1 1    8    7    8 0.00 2745.23   18.54 2698.11   18.54 1844.94  -58.76  424.42  -58.76 
1 1 1    8    7    9 0.00  470.65   22.53  447.66   22.53  157.38  -95.33   63.33   84.67 
1 1 1    8    7   10 0.00 1247.69   20.32 1247.34   20.32  732.50  106.04   72.73  -73.96 
1 1 1    8    7   11 0.00 1474.59   20.28 1440.76   20.28  987.29  115.00  131.56  115.00 
1 1 1    8    7   12 0.00 1242.44   18.91 1234.12   18.91  843.32 -175.84  112.33 -175.84 
1 1 1    8    7   13 0.00  362.85   19.41  384.41   19.41  118.60  176.99  106.21   -3.01 
1 1 1    8    7   14 0.00  626.21   18.21  644.68   18.21  454.53   81.46   84.05   81.46 
1 1 1    8    7   15 0.00 1367.48   18.08 1331.13   18.08 1204.24 -131.72  475.90 -131.72 
1 1 1    8    7   16 0.00  234.93   28.95  224.49   28.95   37.39   99.66  282.77   99.66 
1 1 1    8    7   17 0.00  419.80   21.56  458.10   21.56  297.02  137.43  109.81  137.43 
1 1 1    8    7   18 0.00  624.63   17.93  588.84   17.93  349.68  166.52  144.34  -13.48 
1 1 1    8    7   19 0.00  620.69   18.88  628.16   18.88  397.72   32.31   85.74 -147.69 
1 1 1    8    7   20 0.00 1351.44   16.47 1377.49   16.47 1178.45 -173.85  311.02 -173.85 
1 1 1    8    7   21 0.00  290.78   31.06  278.33   31.06   20.45  154.81    8.67  -25.19 
1 1 1    8    7   22 0.00 1447.86   15.50 1418.79   15.50 1299.30  -50.89  385.50  -50.89 
1 1 1    8    7   23 0.00  782.75   20.51  749.81   20.51  610.13  110.07   57.05  110.07 
1 1 1    8    7   24 1.00 1423.16   16.42 1421.67   16.42 1138.27  100.76   83.92  100.76 
1 1 1    8    7   25 0.00  260.89   44.76  239.78   44.76   30.91 -176.63  141.18    3.37 
1 1 1    8    7   26 0.00  852.76   20.19  873.65   20.19  755.29  -54.28  167.31  -54.28 
1 1 1    8    7   27 0.00  596.02   26.05  624.63   26.05  494.28 -140.25   51.04 -140.25 
1 1 1    8    7   28 0.00  705.84   24.47  661.92   24.47  299.95  -68.83  510.00  111.17 
1 1 1    8    7   29 0.00  474.56   36.87  493.29   36.87  441.23  113.46  213.27  113.46 
1 1 1    8    7   30 0.00  514.01   31.03  540.10   31.03  130.30   96.42  620.14  -83.58 
1 1 1    8    7   31 0.00  120.28   67.74  245.43   67.74   52.39  151.38  269.14  151.38 
1 1 1    8    7   32 0.00  546.74   32.55  512.02   32.55  432.40 -116.11   45.04   63.89 
1 1 1    8    7   33 1.00  275.29   65.21  213.49   65.21   21.32 -175.37  315.95    4.63 
1 1 1    8    7   34 0.00  327.51   60.17  232.56   60.17  155.44  -98.16   55.83   81.84 
1 1 1    8    7   35 0.00  224.67   72.01  250.56   72.01   71.36  160.38  149.26  -19.62 
1 1 1    8    7   36 0.00  270.38   69.57  346.26   69.57  217.57 -175.76   81.23    4.24 
1 1 1    8    7   37 1.00  112.43   70.46  157.48   70.46   85.44 -149.83  321.67 -149.83 
1 1 1    8    7   38 0.00   82.16   65.10  124.84   65.10   19.08  -73.04   83.95  -73.04 
1 1 1    8    7   39 0.00  106.66   61.10   86.73   61.10   51.93   46.51  175.68   46.51 
1 1 1    8    7   40 0.00  217.11   81.20  211.47   81.20  221.49 -143.63   32.24 -143.63 
1 1 1    8    7   41 0.00  229.06   79.87  275.26   79.87  384.19  155.20  186.03  155.20 
1 1 1    8    7   42 0.00  112.32   62.32   94.62   62.32   23.97   39.14  144.92   39.14 
1 1 1    8    7   43 0.00  130.56   74.23  114.06   74.23    9.55   85.20  192.62  -94.80 
1 1 1    8    7   44 0.00   87.06   59.52  100.55   59.52   17.97   -0.34  196.51   -0.34 
1 1 1    8    7   45 0.00   83.86   54.71   89.20   54.71   14.54  -58.42  141.65  -58.42 
1 1 1    9    1    1 0.00  869.17   22.17  832.30   22.17  393.05 -137.64   85.23   42.36 
1 1 1    9    1    2 0.00 1620.28   26.26 1633.94   26.26  885.64   75.32   52.69 -104.68 
1 1 1    9    1    3 0.00  565.23   18.47  573.94   18.47  270.88 -163.96   75.83 -163.96 
1 1 1    9    1    4 0.00 1656.93   22.12 1639.48   22.12  960.10  126.49   82.78  126.49 
1 1 1    9    1    5 0.00 2011.56   21.08 2021.81   21.08 1092.19   68.74   86.62 -111.26 
1 1 1    9    1    6 0.00 1801.05   21.26 1801.21   21.26  992.96   13.34   47.25 -166.66 
1 1 1    9    1    7 0.00 2804.73   16.96 2717.81   16.96 1813.12   92.95  411.33   92.95 
1 1 1    9    1    8 0.00 1546.85   18.17 1580.80   18.17  859.47  -15.41   97.03  164.59 
1 1 1    9    1    9 0.00 1154.04   17.59 1160.68   17.59  637.56   50.46   59.65 -129.54 
1 1 1    9    1   10 0.00 1840.38   17.82 1847.14   17.82 1168.67  -49.63  145.12  -49.63 
1 1 1    9    1   11 0.00 1352.10   17.95 1355.07   17.95  556.71  136.07  545.65  -43.93 
1 1 1    9    1   12 0.00 1134.55   16.22 1137.40   16.22  621.60  -40.50  143.89  139.50 
1 1 1    9    1   13 1.00  570.79   18.49  549.66   18.49  364.00  150.86  194.28  150.86 
1 1 1    9    1   14 0.00  459.34   19.35  485.69   19.35  181.35  155.74  163.62  -24.26 
1 1 1    9    1   15 0.00  914.46   15.52  919.01   15.52  691.60    3.16  139.55    3.16 
1 1 1    9    1   16 0.00  459.61   18.23  456.25   18.23  221.79  160.92   99.41  -19.08 
1 1 1    9    1   17 1.00  664.35   16.57  660.50   16.57  505.26  -74.26  114.66  -74.26 
1 1 1    9    1   18 0.00  353.64   23.63  316.68   23.63  111.97   51.17    7.16   51.17 
1 1 1    9    1   19 1.00  614.84   19.31  637.78   19.31  536.10  -51.05  262.00  -51.05 
1 1 1    9    1   20 0.00 1205.91   17.70 1234.20   17.70  896.80   -3.43   25.25   -3.43 
1 1 1    9    1   21 0.00  621.23   25.33  644.93   25.33  589.17  -71.85  443.00  -71.85 
1 1 1    9    1   22 0.00 1597.93   14.99 1603.78   14.99 1351.09  167.26  301.97  167.26 
1 1 1    9    1   23 0.00 1858.33   14.44 1874.54   14.44 1636.80 -124.34  425.47 -124.34 
1 1 1    9    1   24 0.00 1575.66   15.12 1630.51   15.12 1312.21  117.23  229.86  117.23 
1 1 1    9    1   25 0.00  694.43   21.77  688.25   21.77  566.60 -119.79  136.96 -119.79 
1 1 1    9    1   26 0.00 1284.46   16.66 1231.97   16.66 1088.90  -86.54  246.07  -86.54 
1 1 1    9    1   27 0.00  334.30   39.29  335.45   39.29  158.45  126.78    5.55  126.78 
1 1 1    9    1   28 0.00  830.92   20.95  823.15   20.95  674.04   35.12   52.51   35.12 
1 1 1    9    1   29 1.00  551.70   27.25  630.73   27.25  426.46   36.00   62.21 -144.00 
1 1 1    9    1   30 0.00  403.22   42.59  375.66   42.59  108.46  144.66  376.84  -35.34 
1 1 1    9    1   31 0.00  601.24   30.68  595.01   30.68  391.75   28.42  201.19 -151.58 
1 1 1    9    1   32 0.00  284.69   66.03  211.56   66.03   44.09  -75.80   54.89  104.20 
1 1 1    9    1   33 0.00  231.18   72.97  151.11   72.97   81.84  138.36  398.72  138.36 
1 1 1    9    1   34 0.00  654.45   35.83  533.75   35.83  627.79  113.49  211.69  113.49 
1 1 1    9    1   35 0.00  494.80   39.70  540.03   39.70  516.17  -76.06  108.62  -76.06 
1 1 1    9    1   36 0.00  253.55   76.18  252.24   76.18  119.20  150.93   93.84  -29.07 
1 1 1    9    1   37 0.00  374.45   61.53  278.14   61.53  281.10  150.53   19.14  -29.47 
1 1 1    9    1   38 0.00  112.62   75.47  183.38   75.47    8.97  137.81   33.38  -42.19 
1 1 1    9    1   39 0.00  369.55   65.16  279.40   65.16  488.22  -66.15  193.79  -66.15 
1 1 1    9    1   40 0.00  143.32   70.29  101.92   70.29   22.75 -172.26  185.30 -172.26 
1 1 1    9    1   41 0.00  422.78   58.19  410.83   58.19  669.74  109.98  135.34  109.98 
1 1 1    9    1   42 0.00  108.89   60.81   84.64   60.81   13.03  178.17   60.51  178.17 
1 1 1    9    1   43 0.00  138.69   74.83  105.48   74.83   16.56   83.14  102.82  -96.86 
1 1 1    9    1   44 0.00   97.82   62.11  100.41   62.11    4.11 -148.29  129.47   31.71 
1 1 1    9    1   45 0.00   74.57   50.19   80.64   50.19   47.93 -155.64  212.30 -155.64 
1 1 1    9    1   46 0.00   72.55   48.14   77.90   48.14   40.07   26.51  161.75   26.51 
1 1 1    9    2    1 0.00 1016.47   21.14 1001.80   21.14  607.24 -179.75  134.06 -179.75 
1 1 1    9    2    2 0.00 2000.45   25.69 2037.13   25.69 1130.01  -48.06    9.42  -48.06 
1 1 1    9    2    3 0.00 1257.77   19.67 1261.36   19.67  515.17 -108.48  354.20   71.52 
1 1 1    9    2    4 0.00 3384.67   18.72 3313.29   18.72 1794.95   26.72  173.56 -153.28 
1 1 1    9    2    5 0.00 1241.95   16.86 1224.01   16.86  592.70   65.92  173.71 -114.08 
1 1 1    9    2    6 0.00 3627.67   19.00 3672.75   19.00 2199.69   62.50  246.19   62.50 
1 1 1    9    2    7 0.00 1975.55   19.45 1992.16   19.45 1059.29 -127.87  179.27   52.13 
1 1 1    9    2    8 0.00 1759.76   18.09 1773.05   18.09  954.17    9.93  151.90 -170.07 
1 1 1    9    2    9 0.00 2478.51   16.90 2493.46   16.90 1661.98 -111.86  377.47 -111.86 
1 1 1    9    2   10 0.00  309.97   20.11  318.43   20.11   98.27  -59.28  467.98  -59.28 
1 1 1    9    2   11 0.00  253.04   28.65  190.07   28.65   47.18  -23.70  149.23  -23.70 
1 1 1    9    2   12 0.00 1248.31   16.99 1245.93   16.99  827.86   86.17  128.39   86.17 
1 1 1    9    2   13 0.00  303.77   22.73  311.41   22.73    5.11  -59.99  297.16  -59.99 
1 1 1    9    2   14 1.00  613.12   18.56  658.21   18.56  319.65 -103.00  122.05   77.00 
1 1 1    9    2   15 0.00  229.06   24.44  242.06   24.44   19.37 -110.07  135.54 -110.07 
1 1 1    9    2   16 0.00 1194.40   14.84 1201.98   14.84  981.35 -177.94  279.15 -177.94 
1 1 1    9    2   17 0.00  624.94   17.12  626.79   17.12  210.62  131.34  454.36  -48.66 
1 1 1    9    2   18 0.00  179.51   34.63  221.67   34.63    7.85   33.54   53.14   33.54 
1 1 1    9    2   19 0.00 1186.12   17.07 1187.38   17.07  984.32  -74.06  270.80  -74.06 
1 1 1    9    2   20 0.00 1310.08   17.71 1313.77   17.71 1322.27 -154.38  746.47 -154.38 
1 1 1    9    2   21 0.00 1097.12   18.44 1034.60   18.44  760.41  167.73   47.03  -12.27 
1 1 1    9    2   22 0.00 1379.78   15.76 1403.04   15.76 1242.12 -148.25  396.08 -148.25 
1 1 1    9    2   23 0.00 1899.41   14.63 1900.87   14.63 1698.35   45.60  479.81   45.60 
1 1 1    9    2   24 0.00  870.96   19.17  881.24   19.17  835.46  130.35  402.87  130.35 
1 1 1    9    2   25 0.00  170.03   61.54  121.15   61.54  203.93 -122.75  535.71 -122.75 
1 1 1    9    2   26 0.00  967.06   18.97  954.66   18.97  766.07   40.02   62.03   40.02 
1 1 1    9    2   27 1.00  496.08   28.61  519.66   28.61  384.01   83.13   44.55   83.13 
1 1 1    9    2   28 0.00  242.84   63.98  156.75   63.98   10.79  -69.38  143.88  -69.38 
1 1 1    9    2   29 0.00  314.68   48.69  345.49   48.69  165.19  162.57   50.95  -17.43 
1 1 1    9    2   30 0.00  791.69   22.75  824.19   22.75  654.27  -88.52   25.21   91.48 
1 1 1    9    2   31 0.00  355.42   40.43  446.47   40.43  143.27  -83.77  346.88   96.23 
1 1 1    9    2   32 0.00  216.82   75.56  186.46   75.56    1.74  -89.57   75.74  -89.57 
1 1 1    9    2   33 0.00  469.91   39.62  504.40   39.62  415.71   52.91   13.81   52.91 
1 1 1    9    2   34 0.00  619.53   30.39  634.92   30.39  647.15 -172.44  167.68 -172.44 
1 1 1    9    2   35 0.00  146.69   75.74  187.27   75.74  102.84 -115.13  404.01 -115.13 
1 1 1    9    2   36 0.00  229.70   73.75  274.08   73.75  119.87  155.45   49.04  -24.55 
1 1 1    9    2   37 0.00  207.87   79.16  264.70   79.16  124.87  103.77  102.82  -76.23 
1 1 1    9    2   38 0.00  291.17   66.71  335.90   66.71  382.28  -51.79   35.89  -51.79 
1 1 1    9    2   39 0.00  139.17   69.86   98.44   69.86   12.53   -1.51  119.61   -1.51 
1 1 1    9    2   40 0.00  209.90   85.71  212.89   85.71  177.59   72.67  130.56 -107.33 
1 1 1    9    2   41 0.00  128.49   75.95  149.06   75.95   31.18  -89.02  114.56   90.98 
1 1 1    9    2   42 0.00   85.67   64.97  124.18   64.97   43.43  165.12  237.55  165.12 
1 1 1    9    2   43 0.00  100.36   63.34   98.61   63.34   61.78  -44.16  273.89  -44.16 
1 1 1    9    2   44 0.00   88.19   53.83   77.92   53.83   21.46 -162.88  112.43 -162.88 
1 1 1    9    2   45 0.00   78.81   52.40   85.90   52.40   29.47  -26.81  179.42  -26.81 
1 1 1    9    2   46 0.00   68.37   44.83   70.01   44.83   24.30   33.08   82.29   33.08 
1 1 1    9    3    1 0.00  868.58   21.01  890.31   21.01  577.60  -25.34  266.86  -25.34 
1 1 1    9    3    2 0.00 2621.46   21.61 2589.60   21.61 1132.49   96.82  632.12  -83.18 
1 1 1    9    3    3 0.00 2841.05   16.22 2767.52   16.22 1587.92  -89.50   56.73  -89.50 
1 1 1    9    3    4 0.00 1320.19   17.70 1337.71   17.70  701.10  134.68   51.98  -45.32 
1 1 1    9    3    5 0.00 4234.91    1.81 4230.42    1.81 2617.07   10.98  461.52   10.98 
1 1 1    9    3    6 0.00 1806.23   18.15 1801.38   18.15 1083.49  -37.40  107.60  -37.40 
1 1 1    9    3    7 0.00 2330.14   17.05 2337.74   17.05 1529.80  -25.78  353.74  -25.78 
1 1 1    9    3    8 0.00 1330.24   17.72 1341.81   17.72  859.08   10.08  185.05   10.08 
1 1 1    9    3    9 0.00 1400.17   18.23 1439.16   18.23  966.23    0.01  281.41    0.01 
1 1 1    9    3   10 0.00 1512.87   19.52 1499.54   19.52  827.50   59.00  178.97 -121.00 
1 1 1    9    3   11 0.00  647.85   17.89  653.56   17.89  100.87  110.40  558.79  -69.60 
1 1 1    9    3   12 0.00 1319.64   16.54 1307.72   16.54  711.39   45.68  218.93 -134.32 
1 1 1    9    3   13 0.00  783.80   18.77  738.81   18.77  457.96  101.12    4.40  -78.88 
1 1 1    9    3   14 0.00 1009.40   17.50 1018.03   17.50  805.74 -138.22  233.51 -138.22 
1 1 1    9    3   15 0.00  872.04   17.82  888.38   17.82  620.95  123.21   38.13  123.21 
1 1 1    9    3   16 0.00  857.99   16.59  876.44   16.59  522.51  117.05  163.19  -62.95 
1 1 1    9    3   17 0.00  748.11   16.86  739.65   16.86  540.71   69.01   42.82   69.01 
1 1 1    9    3   18 0.00  599.85   19.55  620.72   19.55  531.08 -131.94  262.06 -131.94 
1 1 1    9    3   19 0.00  443.66   22.55  422.20   22.55  176.67 -118.35  209.14   61.65 
1 1 1    9    3   20 0.00  765.34   18.74  813.71   18.74  360.11  112.75  420.80  -67.25 
1 1 1    9    3   21 0.00   82.04   49.68  106.64   49.68   88.30  127.67  197.21  127.67 
1 1 1    9    3   22 0.00  653.99   21.17  626.20   21.17  530.24   74.21  157.62   74.21 
1 1 1    9    3   23 0.00 1428.45   15.83 1406.13   15.83 1257.28   82.42  341.93   82.42 
1 1 1    9    3   24 0.00  678.39   21.20  652.14   21.20  511.28  -52.62   69.23  -52.62 
1 1 1    9    3   25 0.00  800.28   19.52  807.93   19.52  664.97  -28.14  134.90  -28.14 
1 1 1    9    3   26 0.00  488.27   27.65  525.87   27.65  420.29 -168.82  152.84 -168.82 
1 1 1    9    3   27 0.00  236.75   47.36  322.09   47.36   45.24  120.96  239.01  -59.04 
1 1 1    9    3   28 0.00  252.69   50.10  297.58   50.10    4.18  -86.40  372.79  -86.40 
1 1 1    9    3   29 0.00  908.26   21.16  927.38   21.16  752.29 -148.09    7.74 -148.09 
1 1 1    9    3   30 0.00  581.89   27.58  575.53   27.58  533.38 -149.30  160.38 -149.30 
1 1 1    9    3   31 0.00  358.50   41.78  426.44   41.78  294.44   98.93   47.58   98.93 
1 1 1    9    3   32 0.00  442.17   45.89  394.92   45.89  303.99   89.42   61.45  -90.58 
1 1 1    9    3   33 0.00  537.96   39.32  544.33   39.32  594.50  167.91  283.07  167.91 
1 1 1    9    3   34 1.00  307.59   60.44  319.74   60.44  208.79  102.36   36.90  -77.64 
1 1 1    9    3   35 0.00  342.11   51.83  354.67   51.83  266.54   27.38   30.24 -152.62 
1 1 1    9    3   36 0.00  542.08   39.81  513.79   39.81  605.55  169.84  217.77  169.84 
1 1 1    9    3   37 0.00  459.95   45.05  438.30   45.05  396.13 -114.67  103.60   65.33 
1 1 1    9    3   38 0.00   81.00   62.61  118.80   62.61   97.12  109.59  292.95  109.59 
1 1 1    9    3   39 0.00  211.99   77.55   97.40   77.55   47.27    3.79  186.56 -176.21 
1 1 1    9    3   40 0.00  134.98   69.00   99.35   69.00   59.97  -82.51  289.09  -82.51 
1 1 1    9    3   41 0.00  131.46   80.71  200.52   80.71   94.48 -175.58   26.01    4.42 
1 1 1    9    3   42 0.00  144.37   71.83  110.93   71.83   14.59  114.80  192.49  -65.20 
1 1 1    9    3   43 0.00  155.40   82.85  138.94   82.85   34.38  170.22   14.37   -9.78 
1 1 1    9    3   44 0.00   97.11   63.24  107.57   63.24   13.13   47.44   76.35 -132.56 
1 1 1    9    3   45 0.00   85.72   55.56   91.07   55.56    0.68 -116.70   21.80 -116.70 
1 1 1    9    3   46 0.00   78.30   49.75   79.18   49.75   15.93  -42.24   79.68  -42.24 
1 1 1    9    4    1 0.00 1359.45   19.19 1342.81   19.19  720.88   90.41   22.55  -89.59 
1 1 1    9    4    2 0.00 2876.51   14.14 2866.19   14.14 1497.40 -140.28  179.90   39.72 
1 1 1    9    4    3 0.00 1451.81   17.59 1464.96   17.59  844.62  144.72  102.58  144.72 
1 1 1    9    4    4 0.00  198.89   20.05  201.35   20.05  151.81 -158.91  402.16 -158.91 
1 1 1    9    4    5 0.00 1870.55   18.10 1891.34   18.10 1278.77  -40.31  469.54  -40.31 
1 1 1    9    4    6 1.00 1242.70   17.79 1217.08   17.79  415.07  -20.64  563.52  159.36 
1 1 1    9    4    7 0.00 1243.04   18.17 1215.84   18.17  634.52  138.96  129.48  -41.04 
1 1 1    9    4    8 0.00 1316.70   18.94 1286.26   18.94  823.95  -40.67  154.50  -40.67 
1 1 1    9    4    9 0.00 1662.49   17.45 1653.67   17.45  895.52 -117.01  165.76   62.99 
1 1 1    9    4   10 0.00 1195.93   18.09 1196.66   18.09  656.65  143.33  128.55  -36.67 
1 1 1    9    4   11 0.00 2681.66   16.90 2610.31   16.90 1816.12   -6.64  326.21   -6.64 
1 1 1    9    4   12 0.00  159.66   32.67  138.34   32.67  128.27  150.47  319.57  150.47 
1 1 1    9    4   13 0.00 1636.35   16.44 1622.04   16.44 1079.08 -175.72   83.52 -175.72 
1 1 1    9    4   14 0.00  630.33   19.40  635.54   19.40  364.24  -12.87   97.16  167.13 
1 1 1    9    4   15 0.00  693.05   17.60  725.76   17.60  429.89   80.77   94.94  -99.23 
1 1 1    9    4   16 0.00  583.42   18.50  593.71   18.50  393.47   12.64   30.17   12.64 
1 1 1    9    4   17 0.00  374.02   24.40  376.71   24.40  166.58   48.63  110.32 -131.37 
1 1 1    9    4   18 0.00  459.60   21.41  450.51   21.41  279.99  -39.23   19.54  140.77 
1 1 1    9    4   19 0.00  804.55   18.98  846.66   18.98  694.73   38.22  231.57   38.22 
1 1 1    9    4   20 0.00  630.65   18.46  676.54   18.46  372.11 -167.65  183.40   12.35 
1 1 1    9    4   21 0.00  324.58   29.77  330.55   29.77  107.39  120.61  163.82  -59.39 
1 1 1    9    4   22 0.00  462.51   24.55  479.03   24.55  325.76   97.85   31.51   97.85 
1 1 1    9    4   23 0.00  157.20   58.05  126.36   58.05   70.06  -90.88  190.85  -90.88 
1 1 1    9    4   24 0.00  817.79   19.50  845.10   19.50  709.92  -48.88  199.04  -48.88 
1 1 1    9    4   25 1.00 1293.51   16.82 1265.24   16.82  809.75  168.91  350.67  -11.09 
1 1 1    9    4   26 0.00  541.91   24.89  575.10   24.89  240.34  -84.32  357.47   95.68 
1 1 1    9    4   27 0.00  212.51   61.33  204.46   61.33    0.48 -168.96   87.52   11.04 
1 1 1    9    4   28 0.00  548.29   28.60  517.56   28.60  512.88   66.49  285.54   66.49 
1 1 1    9    4   29 0.00  592.61   25.89  620.25   25.89  601.64  145.32  285.07  145.32 
1 1 1    9    4   30 0.00  463.61   33.40  450.23   33.40  401.18   91.93  216.58   91.93 
1 1 1    9    4   31 0.00  140.25   71.84  224.13   71.84   60.96 -153.96  281.72 -153.96 
1 1 1    9    4   32 0.00  600.77   31.91  541.76   31.91  525.87   81.61   84.27   81.61 
1 1 1    9    4   33 0.00  407.02   48.18  339.85   48.18  277.75  123.15   40.17  -56.85 
1 1 1    9    4   34 0.00  222.87   61.15  374.36   61.15  154.71 -147.10  148.26   32.90 
1 1 1    9    4   35 0.00  180.78   73.89  120.55   73.89   59.20  -29.94  228.35  -29.94 
1 1 1    9    4   36 0.00  171.01   69.92  300.86   69.92   37.26   70.00  476.84   70.00 
1 1 1    9    4   37 0.00  229.81   81.74  139.63   81.74   38.85   84.34   91.52  -95.66 
1 1 1    9    4   38 0.00  208.30   82.58  177.61   82.58   98.76  -35.80   20.12  -35.80 
1 1 1    9    4   39 0.00  109.13   68.24  122.18   68.24   62.80  -46.33  293.87  -46.33 
1 1 1    9    4   40 0.00  109.25   72.30  145.41   72.30    1.00 -132.37   78.60 -132.37 
1 1 1    9    4   41 0.00  201.98   84.69  217.88   84.69  179.47   22.39  194.85 -157.61 
1 1 1    9    4   42 0.00  172.42   74.09   87.63   74.09   29.16   68.88  183.21 -111.12 
1 1 1    9    4   43 0.00  105.16   62.99   94.07   62.99    6.46  -57.37   37.17  -57.37 
1 1 1    9    4   44 0.00   98.28   60.51   94.55   60.51    4.77 -160.86  155.51 -160.86 
1 1 1    9    4   45 0.00   92.82   56.17   86.38   56.17    5.90  -30.57  125.45  -30.57 
1 1 1    9    5    1 0.00 2173.84   17.37 2240.68   17.37 1185.27  -92.65   47.90   87.35 
1 1 1    9    5    2 0.00 2887.66   14.04 2883.96   14.04 1665.34  118.61  153.69  118.61 
1 1 1    9    5    3 0.00 1917.28   17.08 1863.37   17.08 1049.89   51.65   25.61   51.65 
1 1 1    9    5    4 0.00 1476.03   17.54 1467.02   17.54  730.63  -39.16  153.23  140.84 
1 1 1    9    5    5 0.00 1427.71   17.79 1413.22   17.79  875.16  -37.34  162.85  -37.34 
1 1 1    9    5    6 0.00  726.47   17.41  710.75   17.41  167.89   61.00  445.67 -119.00 
1 1 1    9    5    7 0.00 2925.58   16.16 2925.46   16.16 1855.80  -66.47  302.08  -66.47 
1 1 1    9    5    8 0.00  986.01   18.41  965.79   18.41  471.30  -43.59  163.30  136.41 
1 1 1    9    5    9 0.00 2029.60   19.56 2037.71   19.56 1360.79 -110.52  311.19 -110.52 
1 1 1    9    5   10 0.00 1408.09   19.46 1427.37   19.46 1056.41   39.24  401.89   39.24 
1 1 1    9    5   11 0.00  996.50   17.49  978.20   17.49  602.84   16.02   25.09   16.02 
1 1 1    9    5   12 0.00 1013.06   19.44 1007.96   19.44  668.96 -142.07   93.78 -142.07 
1 1 1    9    5   13 1.00  627.42   19.47  613.71   19.47  360.64 -124.18    3.48   55.82 
1 1 1    9    5   14 0.00 1831.99   16.04 1799.58   16.04 1514.07   56.09  475.47   56.09 
1 1 1    9    5   15 0.00 1015.55   17.19  992.69   17.19  839.50   40.92  294.23   40.92 
1 1 1    9    5   16 0.00  826.22   18.85  848.75   18.85  556.20  151.06   52.51  -28.94 
1 1 1    9    5   17 0.00  334.45   23.26  370.52   23.26  131.90 -118.09  145.97   61.91 
1 1 1    9    5   18 0.00  638.25   19.47  654.88   19.47  600.58    8.73  410.82    8.73 
1 1 1    9    5   19 0.00  695.69   19.15  679.44   19.15  491.62 -118.50   26.31 -118.50 
1 1 1    9    5   20 0.00 1471.84   15.17 1511.43   15.17 1090.84  165.16   29.30  -14.84 
1 1 1    9    5   21 0.00 1214.45   16.71 1244.76   16.71  852.91   67.60  134.99 -112.40 
1 1 1    9    5   22 0.00  487.23   23.50  490.78   23.50  250.90   -2.58  184.73  177.42 
1 1 1    9    5   23 0.00  742.36   19.54  728.82   19.54  587.40  -55.86   81.22  -55.86 
1 1 1    9    5   24 0.00 1411.47   15.53 1441.01   15.53 1353.99  118.50  548.64  118.50 
1 1 1    9    5   25 0.00  105.99   55.67  105.79   55.67  184.87   57.75  425.55   57.75 
1 1 1    9    5   26 0.00  369.77   34.45  371.91   34.45  117.74  103.41  277.92  -76.59 
1 1 1    9    5   27 0.00  701.18   23.99  656.43   23.99  563.34   99.18   84.30   99.18 
1 1 1    9    5   28 0.00  755.11   24.08  738.88   24.08  559.50   71.23   71.35 -108.77 
1 1 1    9    5   29 0.00  702.65   24.77  764.55   24.77  581.50  130.97   25.21  -49.03 
1 1 1    9    5   30 0.00  115.08   67.65  152.25   67.65   93.95  149.74  253.55  149.74 
1 1 1    9    5   31 0.00  455.74   37.48  517.60   37.48  351.23   37.26   84.03 -142.74 
1 1 1    9    5   32 0.00  363.40   54.26  296.83   54.26  220.94 -120.94   26.87 -120.94 
1 1 1    9    5   33 0.00  742.95   27.59  762.36   27.59  893.74  168.77  442.92  168.77 
1 1 1    9    5   34 0.00  497.70   36.74  579.51   36.74  522.75   42.52   76.16   42.52 
1 1 1    9    5   35 0.00  313.59   65.99  356.02   65.99  252.74  147.27   97.06  147.27 
1 1 1    9    5   36 0.00  178.84   77.87  221.90   77.87   29.21 -118.45   99.43   61.55 
1 1 1    9    5   37 0.00  311.31   62.74  300.19   62.74  230.12 -155.52  103.01   24.48 
1 1 1    9    5   38 0.00  123.41   72.94  130.56   72.94   42.02 -157.42  287.24 -157.42 
1 1 1    9    5   39 0.00  157.35   70.53   81.44   70.53    1.85 -121.20   72.79 -121.20 
1 1 1    9    5   40 0.00  241.50   78.12  281.00   78.12  300.61  -18.70   77.19  161.30 
1 1 1    9    5   41 0.00  182.03   78.51  131.23   78.51   30.86  174.53   12.11   -5.47 
1 1 1    9    5   42 0.00  285.41   77.26  297.82   77.26  521.66  -82.88  170.75  -82.88 
1 1 1    9    5   43 0.00  110.62   73.63  132.65   73.63   20.68  142.90  308.82  142.90 
1 1 1    9    5   44 0.00   79.47   52.93   83.88   52.93   52.63 -162.86  227.06 -162.86 
1 1 1    9    5   45 0.00   93.58   60.96  105.45   60.96   14.86  -93.93   57.36   86.07 
1 1 1    9    6    1 0.00 3490.83   29.04 3567.75   29.04 2127.59   90.99  382.42   90.99 
1 1 1    9    6    2 0.00  545.20   14.85  530.65   14.85  215.47  -48.07   72.00  -48.07 
1 1 1    9    6    3 0.00 1339.09   17.83 1324.26   17.83  617.42  -48.20  209.83  131.80 
1 1 1    9    6    4 1.00  921.16   16.27  915.46   16.27  445.17   73.45   98.34 -106.55 
1 1 1    9    6    5 0.00 1580.51   17.67 1641.02   17.67  992.64   33.96  173.13   33.96 
1 1 1    9    6    6 0.00 2647.73   14.85 2686.15   14.85 1830.78  -83.74  592.30  -83.74 
1 1 1    9    6    7 0.00  163.54   24.77  161.96   24.77  223.58   58.93  527.09   58.93 
1 1 1    9    6    8 0.00 3158.31   13.68 3139.08   13.68 2042.28 -141.39  364.32 -141.39 
1 1 1    9    6    9 0.00 1205.19   20.56 1272.63   20.56  959.38 -108.39  464.25 -108.39 
1 1 1    9    6   10 0.00 1083.66   17.90 1105.46   17.90  550.90  102.81  216.31  -77.19 
1 1 1    9    6   11 0.00  522.31   18.25  536.81   18.25   89.69    1.51   62.75    1.51 
1 1 1    9    6   12 0.00  484.60   20.76  483.20   20.76  140.73 -152.30  269.34   27.70 
1 1 1    9    6   13 0.00 1030.30   18.51 1028.28   18.51  571.98  174.94  266.73   -5.06 
1 1 1    9    6   14 0.00  147.35   34.72  217.87   34.72  151.02  151.62  431.69  151.62 
1 1 1    9    6   15 0.00  504.12   19.12  526.99   19.12  257.41   57.82  138.86 -122.18 
1 1 1    9    6   16 0.00  792.89   18.67  779.99   18.67  762.61 -114.02  468.35 -114.02 
1 1 1    9    6   17 0.00  975.72   17.46  995.33   17.46  887.67   28.82  368.57   28.82 
1 1 1    9    6   18 0.00 1174.86   15.96 1195.73   15.96  999.70 -174.85  305.93 -174.85 
1 1 1    9    6   19 0.00  563.43   21.61  575.90   21.61  263.09   90.15  266.69  -89.85 
1 1 1    9    6   20 0.00  235.58   34.21  285.22   34.21   16.83 -172.93  221.51    7.07 
1 1 1    9    6   21 1.00  445.45   23.63  468.76   23.63  240.08   49.55  138.42 -130.45 
1 1 1    9    6   22 0.00  811.53   18.61  851.04   18.61  669.24  -69.99  104.49  -69.99 
1 1 1    9    6   23 0.00  260.25   38.38  244.20   38.38   18.92  -50.57  315.83  -50.57 
1 1 1    9    6   24 0.00 1074.45   18.17 1094.52   18.17  834.17  160.42   31.07  160.42 
1 1 1    9    6   25 0.00  953.34   19.36  964.93   19.36  768.64  154.97   74.63  154.97 
1 1 1    9    6   26 0.00  784.86   21.51  832.45   21.51  756.42  -68.95  283.35  -68.95 
1 1 1    9    6   27 0.00  656.66   23.61  699.66   23.61  694.31  -44.38  376.54  -44.38 
1 1 1    9    6   28 0.00  842.76   21.72  846.68   21.72  808.87   81.63  272.72   81.63 
1 1 1    9    6   29 0.00  589.02   31.75  539.50   31.75  433.97  -59.32   16.59  120.68 
1 1 1    9    6   30 0.00  224.89   75.64  219.39   75.64   11.47 -105.23   86.21   74.77 
1 1 1    9    6   31 0.00  533.86   39.14  489.66   39.14  409.12  155.07   12.73  -24.93 
1 1 1    9    6   32 0.00  528.35   39.77  484.94   39.77  529.52  163.42  248.20  163.42 
1 1 1    9    6   33 0.00  262.07   75.72  207.03   75.72   36.60   31.42  237.12 -148.58 
1 1 1    9    6   34 0.00  200.29   78.75  123.50   78.75   47.51  -25.04  231.20  -25.04 
1 1 1    9    6   35 0.00  339.94   63.50  321.96   63.50  217.61 -169.22  114.40   10.78 
1 1 1    9    6   36 0.00  128.18   83.56  267.56   83.56   32.52  149.15  148.01  -30.85 
1 1 1    9    6   37 0.00  241.60   78.09  248.72   78.09  201.55   59.74   13.30   59.74 
1 1 1    9    6   38 0.00  292.60   80.32  236.50   80.32  343.14  151.73  100.18  151.73 
1 1 1    9    6   39 0.00   80.06   66.97  128.73   66.97   65.60  100.81  255.86  100.81 
1 1 1    9    6   40 0.00  131.31   75.58  136.13   75.58    5.97 -177.74   58.91    2.26 
1 1 1    9    6   41 0.00  211.56   83.34  156.93   83.34  145.94 -137.69  146.64   42.31 
1 1 1    9    6   42 0.00   77.59   64.25  132.56   64.25   31.69   83.95  208.74   83.95 
1 1 1    9    6   43 0.00   85.68   54.33   79.93   54.33   24.91  -51.96   92.60  -51.96 
1 1 1    9    6   44 0.00  108.61   63.94   99.13   63.94   14.28 -119.13  162.17   60.87 
1 1 1    9    6   45 0.00   84.44   58.97  105.16   58.97    6.19   75.36   47.70 -104.64 
1 1 1    9    7    1 0.00 1297.84   14.50 1275.80   14.50  526.68  -89.49  351.32   90.51 
1 1 1    9    7    2 0.00 1606.84   14.90 1619.94   14.90  842.90  -95.60   92.66   84.40 
1 1 1    9    7    3 0.00 1264.65   15.16 1286.37   15.16  516.28   99.52  373.73  -80.48 
1 1 1    9    7    4 0.00 1525.59   16.15 1564.22   16.15  828.05   33.50   68.09 -146.50 
1 1 1    9    7    5 0.00 2795.51   13.58 2733.00   13.58 1479.49  -65.73  197.91  114.27 
1 1 1    9    7    6 0.00 2027.32   16.39 2089.45   16.39 1209.04 -111.11   55.20 -111.11 
1 1 1    9    7    7 1.00 3331.61   11.86 3284.80   11.86 2149.46 -162.86  432.17 -162.86 
1 1 1    9    7    8 0.00 1571.75   20.80 1585.45   20.80  924.21 -135.16   38.57   44.84 
1 1 1    9    7    9 0.00 1830.93   19.94 1791.36   19.94 1181.01   62.61  163.48   62.61 
1 1 1    9    7   10 1.00 1026.72   20.06 1027.56   20.06  748.74 -164.18  296.75 -164.18 
1 1 1    9    7   11 0.00 1658.89   21.41 1646.25   21.41 1094.93  -50.74  127.73  -50.74 
1 1 1    9    7   12 0.00  284.19   20.79  281.15   20.79   75.87  -32.90  425.16  -32.90 
1 1 1    9    7   13 0.00  485.47   21.78  519.11   21.78  298.87  109.43   17.31  109.43 
1 1 1    9    7   14 0.00 1445.66   16.95 1477.18   16.95 1085.65   51.77  120.49   51.77 
1 1 1    9    7   15 0.00  561.29   21.88  562.87   21.88  273.55  178.83  188.84   -1.17 
1 1 1    9    7   16 0.00  396.53   23.56  444.56   23.56  261.19  -44.55   71.92  -44.55 
1 1 1    9    7   17 1.00  703.98   17.99  715.44   17.99  615.30 -170.75  256.71 -170.75 
1 1 1    9    7   18 0.00  995.52   17.64  999.21   17.64  668.53 -125.28   86.14   54.72 
1 1 1    9    7   19 0.00 1001.46   16.97 1003.36   16.97  719.81  102.12    9.80  -77.88 
1 1 1    9    7   20 0.00  640.23   19.24  657.02   19.24  433.82 -141.35   50.05   38.65 
1 1 1    9    7   21 0.00 1141.73   16.59 1097.47   16.59  955.10  178.79  242.56  178.79 
1 1 1    9    7   22 0.00  279.05   34.81  288.51   34.81   56.44  110.83  183.61  -69.17 
1 1 1    9    7   23 0.00  638.51   21.27  649.49   21.27  518.44    5.08  132.66    5.08 
1 1 1    9    7   24 0.00 1141.77   18.03 1118.86   18.03  887.01  121.65   63.31  121.65 
1 1 1    9    7   25 0.00  307.62   42.80  232.67   42.80   64.79    1.91   86.08 -178.09 
1 1 1    9    7   26 0.00  747.04   23.73  749.14   23.73  704.99   28.34  283.71   28.34 
1 1 1    9    7   27 0.00  473.30   31.83  468.25   31.83  215.52  157.94  277.14  -22.06 
1 1 1    9    7   28 0.00  148.58   69.38  153.59   69.38   71.99  -49.67  216.88  -49.67 
1 1 1    9    7   29 0.00  206.15   66.99  226.99   66.99   11.66 -132.16  203.80 -132.16 
1 1 1    9    7   30 0.00  569.19   30.80  617.78   30.80  627.69   80.47  342.34   80.47 
1 1 1    9    7   31 0.00  388.76   43.47  414.04   43.47  167.57   83.85  308.76  -96.15 
1 1 1    9    7   32 0.00  155.70   70.64  119.32   70.64   43.54   58.54  134.74   58.54 
1 1 1    9    7   33 0.00  489.25   39.50  441.46   39.50  396.99  129.25    5.46  -50.75 
1 1 1    9    7   34 0.00  391.63   44.16  426.48   44.16  410.35  150.26  183.90  150.26 
1 1 1    9    7   35 0.00  145.03   70.60  106.80   70.60   92.11 -105.90  262.35 -105.90 
1 1 1    9    7   36 1.00  214.85   83.19  183.49   83.19   39.57   42.77  199.43 -137.23 
1 1 1    9    7   37 0.00  135.46   77.67  184.81   77.67   24.86   35.97   46.50 -144.03 
1 1 1    9    7   38 0.00  139.13   78.53  190.96   78.53   62.40  -83.48  184.43   96.52 
1 1 1    9    7   39 1.00  155.72   80.14  152.61   80.14   45.40   70.51  170.26 -109.49 
1 1 1    9    7   40 0.00  108.55   83.64  237.09   83.64   96.33  129.77   10.98  -50.23 
1 1 1    9    7   41 0.00  106.97   63.01   98.50   63.01   11.92 -133.66   55.56 -133.66 
1 1 1    9    7   42 0.00  134.40   68.55  106.17   68.55    6.88   28.13   49.78 -151.87 
1 1 1    9    7   43 0.00   98.87   65.35  108.69   65.35    0.03 -144.30   28.31   35.70 
1 1 1    9    7   44 0.00   99.32   62.45  101.07   62.45   20.84   28.01  139.46 -151.99 
1 1 1    9    7   45 0.00   92.82   56.71   88.35   56.71   10.46  -98.60  175.29  -98.60 
1 1 1    9    8    1 0.00 3651.13   25.87 3668.77   25.87 2149.55 -177.77  233.62 -177.77 
1 1 1    9    8    2 0.00 2879.85   10.53 2856.79   10.53 1595.70  140.96    4.04  -39.04 
1 1 1    9    8    3 0.00 1816.33   14.94 1787.89   14.94  828.56  -24.81  350.85  155.19 
1 1 1    9    8    4 0.00 4258.88    1.82 4247.08    1.82 2594.24  -86.36  363.66  -86.36 
1 1 1    9    8    5 0.00 3486.02    2.34 3469.21    2.34 2002.65 -109.12   25.52 -109.12 
1 1 1    9    8    6 0.00 2214.94   15.97 2215.62   15.97 1276.59  118.56    4.94  118.56 
1 1 1    9    8    7 0.00 1866.58   17.12 1898.96   17.12 1257.91 -141.32  283.87 -141.32 
1 1 1    9    8    8 0.00 2257.41   18.91 2303.38   18.91 1430.85   51.49  109.74   51.49 
1 1 1    9    8    9 0.00 1420.58   20.50 1392.80   20.50  893.14  117.50   95.85  117.50 
1 1 1    9    8   10 0.00 1668.39   20.10 1624.75   20.10 1171.77 -174.68  317.40 -174.68 
1 1 1    9    8   11 0.00  878.79   21.29  809.04   21.29  512.01  -62.74    9.46  -62.74 
1 1 1    9    8   12 0.00 1743.15   18.96 1771.37   18.96 1186.89 -168.08   45.82   11.92 
1 1 1    9    8   13 0.00  884.49   21.04  921.67   21.04  611.92   81.09    5.04   81.09 
1 1 1    9    8   14 0.00  117.55   44.42  106.13   44.42   85.09  -29.26  190.77  -29.26 
1 1 1    9    8   15 0.00  704.12   21.44  694.87   21.44  453.77 -102.80   50.93   77.20 
1 1 1    9    8   16 0.00  544.41   18.96  611.26   18.96  426.16  118.86   89.09  118.86 
1 1 1    9    8   17 0.00 1089.82   17.39 1099.37   17.39  840.80  160.99  139.00  160.99 
1 1 1    9    8   18 0.00  443.97   20.38  418.69   20.38  203.27  127.77  141.95  -52.23 
1 1 1    9    8   19 0.00 1283.93   15.67 1291.70   15.67  795.46  128.10  293.28  -51.90 
1 1 1    9    8   20 0.00  396.14   22.91  352.29   22.91  187.94  -21.70   55.41  -21.70 
1 1 1    9    8   21 0.00  505.88   22.27  523.98   22.27  181.38   94.22  370.77  -85.78 
1 1 1    9    8   22 0.00  565.79   22.46  582.87   22.46  321.70  -16.84  187.92  163.16 
1 1 1    9    8   23 0.00 1778.73   16.24 1800.62   16.24 1339.22   32.32   18.81 -147.68 
1 1 1    9    8   24 0.00  431.91   28.56  381.87   28.56   64.59 -157.39  442.34   22.61 
1 1 1    9    8   25 0.00  535.59   24.60  543.81   24.60  216.09   74.49  366.71 -105.51 
1 1 1    9    8   26 0.00  451.98   28.24  478.31   28.24   97.73 -150.63  498.86   29.37 
1 1 1    9    8   27 0.00  731.06   23.41  776.27   23.41  634.51  139.29   93.47  139.29 
1 1 1    9    8   28 0.00  592.42   27.57  577.77   27.57  489.41   27.74   83.29   27.74 
1 1 1    9    8   29 0.00  926.18   22.09  895.94   22.09  780.55  -94.24   56.06  -94.24 
1 1 1    9    8   30 0.00  314.84   47.23  486.89   47.23  306.52    2.57  114.82    2.57 
1 1 1    9    8   31 0.00  234.44   67.44  213.72   67.44   17.23  -68.04   82.67  111.96 
1 1 1    9    8   32 0.00  364.83   46.27  359.32   46.27  282.21  150.81   74.60  150.81 
1 1 1    9    8   33 0.00  461.09   36.38  500.54   36.38  396.04   82.39   44.39  -97.61 
1 1 1    9    8   34 0.00  299.99   54.38  369.39   54.38  257.16  -16.56   14.52  -16.56 
1 1 1    9    8   35 0.00  185.31   76.06  189.52   76.06    6.92   41.10  142.74 -138.90 
1 1 1    9    8   36 0.00  178.19   77.84  207.37   77.84   54.10  110.66  426.92  110.66 
1 1 1    9    8   37 0.00   99.35   82.26  303.31   82.26  107.07  -89.98  190.19   90.02 
1 1 1    9    8   38 0.00  167.27   80.29  214.52   80.29  136.60   66.26  105.70 -113.74 
1 1 1    9    8   39 0.00  260.71   80.00  227.14   80.00  184.28   91.70  248.84  -88.30 
1 1 1    9    8   40 0.00  146.91   82.36  176.16   82.36   44.12  -50.71   31.90  129.29 
1 1 1    9    8   41 0.00  144.54   76.93  133.58   76.93   47.97 -168.91  140.08   11.09 
1 1 1    9    8   42 0.00   88.48   65.49  124.76   65.49   12.66   56.56  114.72   56.56 
1 1 1    9    8   43 0.00  137.20   83.39  152.64   83.39  101.36  -86.88   33.52   93.12 
1 1 1    9    8   44 0.00   88.13   56.50   88.97   56.50    0.46   44.31   36.76   44.31 
1 1 1    9    8   45 0.00   80.69   49.47   72.30   49.47   39.27  133.46  166.37  133.46 
1 1 1   10    1    1 0.00 3899.73   38.97 3912.61   38.97 2380.08   49.14  299.92   49.14 
1 1 1   10    1    2 0.00 1039.28   22.97 1041.34   22.97  554.77   84.87   20.45  -95.13 
1 1 1   10    1    3 0.00 1768.61   24.52 1765.75   24.52 1038.88  -14.76  109.81  -14.76 
1 1 1   10    1    4 0.00 2226.21   26.15 2251.33   26.15 1240.68  -71.08   25.78  108.92 
1 1 1   10    1    5 0.00  737.53   17.03  731.47   17.03  414.97  157.78   81.99  157.78 
1 1 1   10    1    6 0.00 1683.63   20.05 1667.48   20.05 1112.34 -105.40  327.53 -105.40 
1 1 1   10    1    7 0.00 2683.20   24.42 2659.33   24.42 1554.55  147.11   23.16  147.11 
1 1 1   10    1    8 0.00 1144.74   17.59 1151.14   17.59  825.42  -37.85  377.70  -37.85 
1 1 1   10    1    9 0.00 1280.55   17.73 1297.75   17.73  837.87   45.58  202.89   45.58 
1 1 1   10    1   10 0.00 1266.80   17.85 1256.79   17.85  605.55  144.28  293.54  -35.72 
1 1 1   10    1   11 0.00  729.52   17.68  715.74   17.68  347.50  -57.74  119.40  122.26 
1 1 1   10    1   12 0.00 1300.20   21.05 1312.82   21.05  747.43   77.84  107.26 -102.16 
1 1 1   10    1   13 0.00  487.06   21.56  478.65   21.56  184.64  -52.64  160.20  127.36 
1 1 1   10    1   14 0.00  416.93   20.24  405.44   20.24   90.40  122.27  303.96  -57.73 
1 1 1   10    1   15 0.00  331.89   21.51  334.35   21.51   78.66 -132.26   84.31   47.74 
1 1 1   10    1   16 0.00  764.34   16.13  799.00   16.13  661.06   48.37  306.29   48.37 
1 1 1   10    1   17 0.00  460.30   19.24  465.44   19.24  318.27   15.60  114.03   15.60 
1 1 1   10    1   18 0.00  808.05   17.75  810.93   17.75  598.81 -154.22   67.62 -154.22 
1 1 1   10    1   19 0.00 1438.97   16.09 1397.15   16.09 1113.83 -109.25  217.04 -109.25 
1 1 1   10    1   20 0.00  447.94   30.35  459.55   30.35  203.11  -71.86  186.51  108.14 
1 1 1   10    1   21 0.00  488.00   25.49  450.10   25.49  149.04   -5.13  339.92  174.87 
1 1 1   10    1   22 0.00  269.88   38.98  284.50   38.98   56.26 -167.75   60.44   12.25 
1 1 1   10    1   23 0.00  208.76   52.46  198.16   52.46   51.68  -33.23  261.25  -33.23 
1 1 1   10    1   24 0.00 1649.78   16.55 1671.40   16.55 1213.93  175.06   33.56   -4.94 
1 1 1   10    1   25 1.00 1572.63   15.33 1601.61   15.33 1221.78  160.79   53.95  160.79 
1 1 1   10    1   26 0.00  794.79   20.75  786.94   20.75  715.48   92.42  268.34   92.42 
1 1 1   10    1   27 0.00  582.11   26.16  561.11   26.16  407.19  131.22   24.14  -48.78 
1 1 1   10    1   28 0.00  763.89   22.39  818.03   22.39  641.08  -79.93   57.69  -79.93 
1 1 1   10    1   29 0.00  391.08   37.62  340.41   37.62  220.85   93.83   52.47   93.83 
1 1 1   10    1   30 0.00  293.17   58.71  259.08   58.71   61.33 -179.24   24.84    0.76 
1 1 1   10    1   31 0.00  587.94   30.94  587.95   30.94  390.94   96.25  176.60  -83.75 
1 1 1   10    1   32 0.00  368.98   41.47  410.53   41.47  258.62   15.23   82.09 -164.77 
1 1 1   10    1   33 0.00  409.02   49.96  374.98   49.96  281.77   23.53   61.83 -156.47 
1 1 1   10    1   34 0.00  524.99   35.19  538.10   35.19  386.94 -114.77  167.78   65.23 
1 1 1   10    1   35 0.00  247.50   74.39  218.40   74.39   50.38   20.93  193.62 -159.07 
1 1 1   10    1   36 0.00  136.84   70.12   98.35   70.12   11.71  -42.55   33.62  -42.55 
1 1 1   10    1   37 0.00   87.32   72.13  171.93   72.13   13.86  168.76   67.40  168.76 
1 1 1   10    1   38 0.00  145.42   74.49  138.53   74.49   21.39    6.71   71.08 -173.29 
1 1 1   10    1   39 0.00  191.71   77.89  127.88   77.89   21.69   71.70   10.38 -108.30 
1 1 1   10    1   40 0.00  267.28   70.99  364.12   70.99  439.49  -45.51   65.87  -45.51 
1 1 1   10    1   41 1.00  113.90   75.24  164.23   75.24   32.32 -116.91  142.87   63.09 
1 1 1   10    1   42 0.00  163.76   76.34  124.34   76.34    4.71  -63.57    2.69  116.43 
1 1 1   10    1   43 0.00   77.45   51.44   77.15   51.44   89.38  -83.12  253.69  -83.12 
1 1 1   10    1   44 0.00  109.40   62.91   91.29   62.91    8.38  143.30   58.66  -36.70 
1 1 1   10    1   45 0.00   87.78   56.62   92.86   56.62    0.21   26.32   19.74 -153.68 
1 1 1   10    2    1 0.00 1561.03   25.87 1567.20   25.87  908.61  135.28   85.24  135.28 
1 1 1   10    2    2 0.00  549.08   18.73  557.49   18.73  249.23 -142.43   52.08 -142.43 
1 1 1   10    2    3 0.00 3491.58   37.48 3513.44   37.48 2044.70  -94.12  176.63  -94.12 
1 1 1   10    2    4 0.00  888.54   17.59  894.86   17.59  464.39  -66.28    9.40  113.72 
1 1 1   10    2    5 0.00  558.30   16.48  563.13   16.48  127.88 -149.20  313.76   30.80 
1 1 1   10    2    6 0.00 1554.45   18.27 1543.10   18.27  602.46   78.22  552.39 -101.78 
1 1 1   10    2    7 0.00  336.54   16.71  330.02   16.71   52.79  -38.62  378.74  -38.62 
1 1 1   10    2    8 0.00 2277.51   19.03 2305.12   19.03 1407.39   56.76  157.55   56.76 
1 1 1   10    2    9 0.00  634.60   17.71  639.37   17.71  175.57   90.42  336.47  -89.58 
1 1 1   10    2   10 0.00 1549.47   17.69 1522.36   17.69  893.89  -87.04   55.75   92.96 
1 1 1   10    2   11 0.00 2110.12   16.83 2103.93   16.83 1191.11   17.73  199.72 -162.27 
1 1 1   10    2   12 0.00 1291.75   19.77 1221.76   19.77  860.42   -3.05  185.62   -3.05 
1 1 1   10    2   13 0.00 1020.68   18.19 1046.82   18.19  658.13  100.57   50.38  100.57 
1 1 1   10    2   14 0.00  979.70   16.80  979.16   16.80  699.60 -142.55   86.67 -142.55 
1 1 1   10    2   15 0.00  529.22   18.86  536.61   18.86  105.58    2.30  483.97 -177.70 
1 1 1   10    2   16 1.00 1077.70   15.62 1057.13   15.62  715.15   46.31   49.81 -133.69 
1 1 1   10    2   17 0.00  848.01   17.16  849.89   17.16  653.81  178.44  130.56  178.44 
1 1 1   10    2   18 0.00 1400.79   16.38 1415.15   16.38 1063.09  149.74  146.63  149.74 
1 1 1   10    2   19 0.00   82.29   50.91  135.80   50.91   27.95   80.94   65.61   80.94 
1 1 1   10    2   20 0.00  360.90   29.84  393.19   29.84  189.87 -171.26   47.68    8.74 
1 1 1   10    2   21 0.00  988.06   19.38  991.81   19.38  847.19   85.10  269.85   85.10 
1 1 1   10    2   22 0.00  522.06   24.00  550.48   24.00  212.98 -112.59  331.66   67.41 
1 1 1   10    2   23 0.00  515.00   25.23  520.45   25.23  227.83   75.94  280.53 -104.06 
1 1 1   10    2   24 1.00  947.90   17.89  971.60   17.89  591.82   51.72  227.12 -128.28 
1 1 1   10    2   25 0.00  273.03   45.76  267.04   45.76   26.16  -68.41  240.23  111.59 
1 1 1   10    2   26 0.00 1138.53   18.19 1134.90   18.19  817.28   33.01  105.26 -146.99 
1 1 1   10    2   27 0.00  203.20   60.03  222.63   60.03   14.45  138.21  204.79  138.21 
1 1 1   10    2   28 0.00  866.13   21.49  880.66   21.49  717.07   19.12   63.31   19.12 
1 1 1   10    2   29 0.00 1157.76   19.60 1147.15   19.60  832.51   91.74  211.25  -88.26 
1 1 1   10    2   30 0.00  239.91   59.72  313.78   59.72   76.58   70.81  161.49 -109.19 
1 1 1   10    2   31 0.00  531.44   31.31  566.37   31.31  500.39  -55.87  137.45  -55.87 
1 1 1   10    2   32 0.00  596.55   30.55  632.59   30.55  429.57 -101.42  188.87   78.58 
1 1 1   10    2   33 0.00  138.31   70.22  109.69   70.22    3.84 -165.16   10.99 -165.16 
1 1 1   10    2   34 0.00  312.87   61.29  333.51   61.29  176.59  -69.28  159.31  110.72 
1 1 1   10    2   35 0.00  145.02   75.75  224.61   75.75   48.12  -82.67  314.17  -82.67 
1 1 1   10    2   36 0.00  169.46   74.02  123.50   74.02  114.05  169.49  391.87  169.49 
1 1 1   10    2   37 0.00  450.22   49.61  375.81   49.61  395.91 -118.10    3.48   61.90 
1 1 1   10    2   38 0.00  297.42   74.39  230.22   74.39  339.33   36.97  149.21   36.97 
1 1 1   10    2   39 0.00  314.04   69.12  304.58   69.12  348.45  -71.10   88.97  108.90 
1 1 1   10    2   40 0.00  229.66   78.12  109.32   78.12   83.98  162.49   23.59  -17.51 
1 1 1   10    2   41 0.00   67.94   70.27  163.57   70.27    2.52  -38.92  138.64  -38.92 
1 1 1   10    2   42 0.00  118.19   67.36  107.55   67.36    2.16  177.51   74.84  177.51 
1 1 1   10    2   43 0.00  118.38   67.26   96.22   67.26   16.34  -89.61  149.94  -89.61 
1 1 1   10    2   44 0.00   93.77   58.20   89.80   58.20    7.18  167.67  101.35  167.67 
1 1 1   10    2   45 0.00   77.53   50.67   80.32   50.67   34.65  175.10  166.68  175.10 
1 1 1   10    3    1 0.00 2585.52   30.22 2580.24   30.22 1327.61  -76.07  212.84  103.93 
1 1 1   10    3    2 0.00 1508.17   20.99 1501.40   20.99  803.82  122.40   34.51  -57.60 
1 1 1   10    3    3 0.00 2160.44   21.01 2131.11   21.01 1098.95   59.76  169.50 -120.24 
1 1 1   10    3    4 0.00 4111.90   28.68 4127.79   28.68 2339.91 -144.81   92.00 -144.81 
1 1 1   10    3    5 0.00 2705.39   17.01 2739.66   17.01 1786.26 -163.95  489.53 -163.95 
1 1 1   10    3    6 0.00 1412.05   19.12 1407.12   19.12  810.95  -16.37   42.00  -16.37 
1 1 1   10    3    7 0.00 1371.86   17.62 1415.96   17.62  847.61  -43.26  122.68  -43.26 
1 1 1   10    3    8 0.00 1171.07   17.80 1150.90   17.80  500.03   14.14  319.89 -165.86 
1 1 1   10    3    9 0.00 2788.49   15.36 2787.35   15.36 1833.36  -60.16  310.71  -60.16 
1 1 1   10    3   10 0.00 1368.14   18.58 1404.07   18.58  883.52  -22.96  113.92  -22.96 
1 1 1   10    3   11 0.00 1727.16   18.40 1714.97   18.40  966.04  -40.42  169.71  139.58 
1 1 1   10    3   12 0.00  756.55   19.44  750.95   19.44  580.92    2.54  318.86    2.54 
1 1 1   10    3   13 0.00 1587.01   16.92 1580.49   16.92 1050.21 -165.24  118.50 -165.24 
1 1 1   10    3   14 0.00 1381.47   16.72 1362.34   16.72  884.74   29.25  114.94 -150.75 
1 1 1   10    3   15 0.00 1183.99   16.88 1196.56   16.88  711.51   39.13  225.39 -140.87 
1 1 1   10    3   16 0.00  693.77   18.62  688.68   18.62  508.73  145.68   89.60  145.68 
1 1 1   10    3   17 0.00  510.75   21.34  512.41   21.34  358.59   98.41   73.06   98.41 
1 1 1   10    3   18 0.00  738.76   18.17  760.91   18.17  297.02  118.76  444.42  -61.24 
1 1 1   10    3   19 0.00  560.52   22.06  554.57   22.06  322.87    0.06   99.18 -179.94 
1 1 1   10    3   20 0.00  171.37   54.49  123.29   54.49   67.18  110.15  190.25  110.15 
1 1 1   10    3   21 0.00  980.06   18.99  981.88   18.99  699.32   61.66   28.09 -118.34 
1 1 1   10    3   22 0.00 1113.11   17.28 1126.49   17.28  791.60  -36.48   81.27  143.52 
1 1 1   10    3   23 0.00 1135.81   16.45 1161.88   16.45  885.30   76.94   36.66   76.94 
1 1 1   10    3   24 0.00  477.35   26.08  480.25   26.08  367.30   61.16  141.44   61.16 
1 1 1   10    3   25 0.00  194.67   59.14  171.04   59.14   45.07 -164.31  189.87 -164.31 
1 1 1   10    3   26 0.00  163.87   59.31  212.78   59.31   83.37    1.94  331.80    1.94 
1 1 1   10    3   27 0.00  246.37   59.86  184.48   59.86    4.42  -33.83  129.13  146.17 
1 1 1   10    3   28 1.00 1186.44   18.74 1248.33   18.74 1017.96   54.90   84.93   54.90 
1 1 1   10    3   29 0.00  507.49   31.18  563.97   31.18  471.67  132.32  153.94  132.32 
1 1 1   10    3   30 0.00  759.32   24.43  783.15   24.43  551.90 -125.07  168.10   54.93 
1 1 1   10    3   31 0.00  332.76   50.30  290.99   50.30   81.10  -98.13  286.80   81.87 
1 1 1   10    3   32 0.00  378.23   49.93  345.48   49.93  243.64   74.27   51.27 -105.73 
1 1 1   10    3   33 0.00  295.00   61.25  355.69   61.25  132.82   93.09  253.87  -86.91 
1 1 1   10    3   34 0.00  212.43   63.79  381.05   63.79  147.20  170.13  155.87   -9.87 
1 1 1   10    3   35 0.00  572.84   35.00  552.57   35.00  597.26   30.70  166.70   30.70 
1 1 1   10    3   36 0.00  347.77   54.51  347.87   54.51  281.32  151.43   34.53  -28.57 
1 1 1   10    3   37 0.00  274.79   62.78  422.15   62.78  375.87  126.07  173.68  126.07 
1 1 1   10    3   38 0.00  219.48   82.08  210.71   82.08  136.29 -161.84  214.97   18.16 
1 1 1   10    3   39 0.00  281.88   81.77  224.94   81.77  326.79 -147.83  128.08 -147.83 
1 1 1   10    3   40 0.00  203.66   78.84  120.65   78.84   46.03   37.95   21.66 -142.05 
1 1 1   10    3   41 0.00  102.69   71.75  147.78   71.75    2.00   -0.49   15.12  179.51 
1 1 1   10    3   42 0.00  140.85   77.81  162.84   77.81   71.89   83.36   34.47  -96.64 
1 1 1   10    3   43 0.00  104.62   61.61   87.65   61.61   19.26   58.41   90.98   58.41 
1 1 1   10    3   44 0.00   86.06   54.75   84.08   54.75   35.78  157.39  188.23  157.39 
1 1 1   10    3   45 0.00   90.78   52.50   72.52   52.50   10.47  -83.34   71.16  -83.34 
1 1 1   10    4    1 0.00  788.91   18.14  796.36   18.14  340.52   59.12  135.97 -120.88 
1 1 1   10    4    2 0.00 3092.66   22.93 3099.69   22.93 1911.52   56.09  416.45   56.09 
1 1 1   10    4    3 0.00 1881.83   18.45 1879.76   18.45  878.55 -125.65  302.96   54.35 
1 1 1   10    4    4 0.00  570.61   16.25  560.69   16.25  215.76 -147.34  108.32   32.66 
1 1 1   10    4    5 0.00 1159.79   17.06 1147.44   17.06  503.41  143.11  267.11  -36.89 
1 1 1   10    4    6 0.00 2418.94   16.59 2454.82   16.59 1410.83   44.70   48.01   44.70 
1 1 1   10    4    7 0.00  408.60   17.36  437.86   17.36   68.44  -58.62  233.84  121.38 
1 1 1   10    4    8 0.00  260.81   20.37  237.93   20.37   78.38 -112.54  282.18 -112.54 
1 1 1   10    4    9 0.00  636.66   17.12  606.07   17.12  296.22  -77.27   57.29  102.73 
1 1 1   10    4   10 0.00 2834.42   17.10 2825.83   17.10 1677.68 -115.68   96.24   64.32 
1 1 1   10    4   11 1.00  855.83   18.32  829.22   18.32  593.87   41.87  208.04   41.87 
1 1 1   10    4   12 0.00 1179.35   21.25 1193.71   21.25  789.02 -150.77  126.13 -150.77 
1 1 1   10    4   13 0.00  410.30   19.04  425.82   19.04  164.44   54.98  129.23 -125.02 
1 1 1   10    4   14 0.00 1334.30   16.80 1326.61   16.80  924.93   58.59   22.67   58.59 
1 1 1   10    4   15 0.00  150.80   32.68  221.55   32.68  139.41  150.05  408.59  150.05 
1 1 1   10    4   16 0.00  358.23   25.08  353.24   25.08   75.86  -84.42  280.96   95.58 
1 1 1   10    4   17 0.00  380.99   29.20  332.87   29.20   54.06   40.55  339.16 -139.45 
1 1 1   10    4   18 0.00  296.76   27.31  327.19   27.31    8.07  156.39  353.09  -23.61 
1 1 1   10    4   19 0.00  936.71   19.90  966.62   19.90  772.42   48.32  205.36   48.32 
1 1 1   10    4   20 0.00  437.44   26.50  405.12   26.50  183.08  -68.87  178.43  111.13 
1 1 1   10    4   21 0.00  306.58   30.99  329.95   30.99  110.79  -41.94   22.05  138.06 
1 1 1   10    4   22 0.00  563.96   21.75  551.04   21.75  305.66   29.36  177.49 -150.64 
1 1 1   10    4   23 0.00  560.41   23.13  550.85   23.13  485.66   77.94  238.17   77.94 
1 1 1   10    4   24 0.00  570.26   22.91  565.12   22.91  302.25   76.99  202.59 -103.01 
1 1 1   10    4   25 0.00  332.10   36.05  377.66   36.05  183.70 -157.05   19.53   22.95 
1 1 1   10    4   26 0.00 1029.91   18.19 1012.51   18.19  813.02  101.47   58.36  101.47 
1 1 1   10    4   27 1.00  358.05   37.59  425.63   37.59  267.71  -14.94   96.76  -14.94 
1 1 1   10    4   28 0.00  846.77   22.67  844.85   22.67  918.04   87.01  526.87   87.01 
1 1 1   10    4   29 0.00  572.82   27.94  598.53   27.94  486.26 -175.73   70.29 -175.73 
1 1 1   10    4   30 1.00  442.43   34.64  481.65   34.64  402.75   54.21  232.36   54.21 
1 1 1   10    4   31 0.00  305.45   46.70  406.67   46.70   82.88   51.81  387.32 -128.19 
1 1 1   10    4   32 0.00  293.98   53.54  369.06   53.54  219.63  121.79    4.65  121.79 
1 1 1   10    4   33 0.00  318.92   59.07  312.20   59.07  174.94  108.51  126.42  -71.49 
1 1 1   10    4   34 0.00  434.38   46.04  500.99   46.04  440.73   19.18   74.15   19.18 
1 1 1   10    4   35 0.00  546.15   38.58  554.96   38.58  533.36  104.62   47.67  104.62 
1 1 1   10    4   36 0.00  358.75   63.80  281.99   63.80  261.05 -117.90   81.71 -117.90 
1 1 1   10    4   37 0.00  222.35   80.39  246.14   80.39  174.93  -67.29   25.44  -67.29 
1 1 1   10    4   38 0.00  175.61   77.44  131.25   77.44   44.85   78.48  150.85 -101.52 
1 1 1   10    4   39 0.00  330.16   77.41  221.98   77.41  395.11  -44.75  179.27  -44.75 
1 1 1   10    4   40 0.00   78.37   53.75   83.82   53.75   89.58  -34.88  237.89  -34.88 
1 1 1   10    4   41 0.00   87.25   68.08  140.90   68.08   10.63  -64.68  122.32  -64.68 
1 1 1   10    4   42 0.00  105.37   57.86   77.29   57.86   14.73 -161.68   57.83 -161.68 
1 1 1   10    4   43 0.00   96.93   58.15   83.58   58.15   35.34  132.98  133.19  132.98 
1 1 1   10    4   44 0.00   90.20   58.74   96.24   58.74    6.98 -118.75  122.47 -118.75 
1 1 1   10    4   45 0.00   78.93   53.41   89.55   53.41    2.20 -178.32   20.86 -178.32 
1 1 1   10    5    1 0.00 1437.29   16.29 1434.60   16.29  655.83    3.45  237.07 -176.55 
1 1 1   10    5    2 0.00 4243.23    1.50 4245.43    1.50 2459.32 -128.81  182.57 -128.81 
1 1 1   10    5    3 0.00  509.73   16.14  531.55   16.14  186.82   93.89   92.18  -86.11 
1 1 1   10    5    4 0.00 1303.40   17.07 1274.89   17.07  454.55  133.81  514.90  -46.19 
1 1 1   10    5    5 0.00 1086.66   17.31 1062.62   17.31  612.35 -102.29   57.96 -102.29 
1 1 1   10    5    6 0.00 1232.71   17.91 1225.37   17.91  620.90   84.68  126.45  -95.32 
1 1 1   10    5    7 0.00  983.42   18.20  967.77   18.20  669.86  -70.44  295.17  -70.44 
1 1 1   10    5    8 0.00  548.42   17.54  560.20   17.54  126.78   40.36  320.26 -139.64 
1 1 1   10    5    9 0.00 2572.44   16.68 2561.98   16.68 1714.61 -107.14  339.28 -107.14 
1 1 1   10    5   10 0.00  206.98   23.31  212.39   23.31   60.11    4.41  173.86    4.41 
1 1 1   10    5   11 0.00 1822.64   22.88 1763.80   22.88 1117.42  164.70   29.49  164.70 
1 1 1   10    5   12 0.00  482.98   19.61  498.57   19.61  240.78   15.45   32.19 -164.55 
1 1 1   10    5   13 0.00  226.45   31.72  161.47   31.72   22.87  -56.03   80.17  -56.03 
1 1 1   10    5   14 0.00  570.25   18.65  576.53   18.65  149.95  -63.98  449.79  116.02 
1 1 1   10    5   15 1.00 1273.46   18.45 1265.56   18.45  989.26    9.27  218.00    9.27 
1 1 1   10    5   16 0.00  593.13   21.23  560.77   21.23  442.41   26.85  331.39   26.85 
1 1 1   10    5   17 0.00  572.92   22.34  617.03   22.34  211.55  126.46  400.55  -53.54 
1 1 1   10    5   18 0.00  809.54   19.26  805.32   19.26  576.07  116.74   38.90  116.74 
1 1 1   10    5   19 0.00 1269.25   16.36 1273.58   16.36 1019.96   30.20  217.59   30.20 
1 1 1   10    5   20 0.00 1516.51   15.76 1484.65   15.76 1139.24  -86.62   83.75  -86.62 
1 1 1   10    5   21 0.00  585.93   21.16  579.18   21.16  388.70  120.84   30.70  -59.16 
1 1 1   10    5   22 0.00  977.94   17.56  988.21   17.56  873.12  -30.60  296.29  -30.60 
1 1 1   10    5   23 0.00 1378.54   16.60 1382.92   16.60 1126.16   10.25  216.52   10.25 
1 1 1   10    5   24 0.00  684.19   21.73  691.31   21.73  565.18 -112.78  150.14 -112.78 
1 1 1   10    5   25 0.00  968.89   18.45  992.89   18.45  678.53   69.38  127.49 -110.62 
1 1 1   10    5   26 1.00  560.82   25.58  533.34   25.58  443.87 -154.51  114.16 -154.51 
1 1 1   10    5   27 0.00  488.76   28.51  494.22   28.51  175.19   -0.69  390.12  179.31 
1 1 1   10    5   28 0.00  825.72   22.31  822.60   22.31  757.32   12.35  218.11   12.35 
1 1 1   10    5   29 0.00  491.09   29.77  487.93   29.77  427.24  -14.62  160.58  -14.62 
1 1 1   10    5   30 0.00  473.93   32.67  538.00   32.67  331.33   45.01  138.02 -134.99 
1 1 1   10    5   31 0.00  176.23   68.15   85.47   68.15   59.73   12.59  169.14   12.59 
1 1 1   10    5   32 0.00  780.07   26.95  750.39   26.95  794.41  -13.75  259.08  -13.75 
1 1 1   10    5   33 0.00  250.05   71.08  247.16   71.08   85.56  -52.42  115.44  127.58 
1 1 1   10    5   34 0.00  501.01   36.93  541.49   36.93  438.74   65.42   61.37 -114.58 
1 1 1   10    5   35 0.00  161.99   83.08  179.00   83.08   10.72  111.96   84.46  111.96 
1 1 1   10    5   36 0.00  330.14   61.00  409.15   61.00  366.38  -47.34  126.75  -47.34 
1 1 1   10    5   37 0.00  261.66   78.69  122.90   78.69   76.03  168.67  144.72  -11.33 
1 1 1   10    5   38 0.00  215.12   83.93  206.76   83.93  174.21 -135.98  105.32   44.02 
1 1 1   10    5   39 0.00  152.07   76.45  118.80   76.45   13.13 -133.72  102.93   46.28 
1 1 1   10    5   40 0.00  134.21   80.23  188.33   80.23   57.32  116.25  196.46  -63.75 
1 1 1   10    5   41 0.00  103.58   67.91  126.90   67.91   14.00  -35.20  135.21  -35.20 
1 1 1   10    5   42 0.00  116.18   69.83  131.81   69.83    8.94  -54.00   39.74  126.00 
1 1 1   10    5   43 0.00  103.73   67.02  114.08   67.02    2.30   49.70  181.10   49.70 
1 1 1   10    5   44 0.00   87.26   57.49   94.73   57.49   26.02  130.23  201.80  130.23 
1 1 1   10    5   45 0.00   73.31   46.19   68.38   46.19   77.39  121.85  262.88  121.85 
1 1 1   10    6    1 0.00 2760.65   12.20 2723.32   12.20 1511.60 -139.08    9.24   40.92 
1 1 1   10    6    2 0.00 1798.82   16.34 1769.55   16.34 1031.97   77.10  105.91   77.10 
1 1 1   10    6    3 0.00 1967.62   16.18 1953.79   16.18  962.81   92.92  245.26  -87.08 
1 1 1   10    6    4 0.00 2335.92   15.26 2294.94   15.26 1251.22 -126.52   83.65   53.48 
1 1 1   10    6    5 0.00 2653.16   16.21 2676.09   16.21 1459.04   66.92   87.95 -113.08 
1 1 1   10    6    6 1.00  818.55   16.93  781.06   16.93  181.02   23.05  510.02 -156.95 
1 1 1   10    6    7 0.00 1462.79   18.48 1441.20   18.48  964.59  -29.50  294.16  -29.50 
1 1 1   10    6    8 0.00  580.18   18.21  554.27   18.21  226.46 -149.43  123.99   30.57 
1 1 1   10    6    9 0.00  320.57   23.04  345.01   23.04   16.95   30.17  285.98   30.17 
1 1 1   10    6   10 0.00 2472.72   19.27 2456.42   19.27 1870.91  176.20  735.56  176.20 
1 1 1   10    6   11 0.00 1084.32   19.43 1104.38   19.43  440.57  -22.50  451.79  157.50 
1 1 1   10    6   12 0.00 1017.20   18.44 1046.42   18.44  600.14   88.05   59.90  -91.95 
1 1 1   10    6   13 0.00 1251.52   18.68 1311.42   18.68 1043.03  127.93  354.98  127.93 
1 1 1   10    6   14 0.00  443.41   21.82  473.73   21.82  199.12    2.18  143.42 -177.82 
1 1 1   10    6   15 0.00  460.01   24.05  491.62   24.05  144.18 -153.30  312.59   26.70 
1 1 1   10    6   16 0.00  569.35   21.26  621.25   21.26  497.72  -13.85  247.94  -13.85 
1 1 1   10    6   17 0.00  940.69   18.01  970.40   18.01  675.93   46.70    3.98 -133.30 
1 1 1   10    6   18 0.00  924.66   18.54  965.42   18.54  703.00   -6.37   86.52   -6.37 
1 1 1   10    6   19 1.00  244.40   32.79  237.61   32.79    2.08   40.47  209.07   40.47 
1 1 1   10    6   20 0.00  301.48   28.84  306.65   28.84   92.53 -101.86   44.64   78.14 
1 1 1   10    6   21 1.00  728.19   19.40  720.31   19.40  558.51 -168.09   86.11 -168.09 
1 1 1   10    6   22 0.00  149.36   54.47  121.31   54.47  192.58  170.81  485.09  170.81 
1 1 1   10    6   23 0.00  274.12   40.43  271.74   40.43   57.65  108.88   67.24  -71.12 
1 1 1   10    6   24 0.00  513.43   25.69  458.40   25.69  234.87   95.70  208.03  -84.30 
1 1 1   10    6   25 0.00 1384.18   17.12 1468.63   17.12 1295.72  123.72  409.88  123.72 
1 1 1   10    6   26 0.00  498.47   29.32  490.00   29.32  223.00   10.34  277.12 -169.66 
1 1 1   10    6   27 0.00  514.22   26.69  549.76   26.69  376.34  -46.82   35.40  133.18 
1 1 1   10    6   28 0.00 1001.77   20.35 1038.33   20.35  839.34 -146.28   38.47 -146.28 
1 1 1   10    6   29 0.00  128.98   57.20   47.76   57.20  196.76 -129.44  444.41 -129.44 
1 1 1   10    6   30 0.00  392.91   40.25  398.52   40.25  247.74  -75.42   80.83  104.58 
1 1 1   10    6   31 0.00  353.03   51.13  344.68   51.13  214.02  -43.37   53.28  -43.37 
1 1 1   10    6   32 0.00  272.58   68.20  240.37   68.20   57.17  142.41  225.74  -37.59 
1 1 1   10    6   33 0.00  280.01   73.01  173.15   73.01   36.30  148.16  205.52  -31.84 
1 1 1   10    6   34 0.00  130.05   65.09   83.08   65.09  112.14  146.89  282.82  146.89 
1 1 1   10    6   35 0.00  494.96   42.39  451.67   42.39  467.48  -98.86   82.22  -98.86 
1 1 1   10    6   36 0.00  124.00   74.27  126.17   74.27   47.75  -56.01  168.93  -56.01 
1 1 1   10    6   37 0.00  145.08   69.08   85.98   69.08   26.68   46.38  124.46   46.38 
1 1 1   10    6   38 0.00  217.07   81.64  253.72   81.64  265.39   74.71   41.15   74.71 
1 1 1   10    6   39 0.00  198.70   87.75  211.54   87.75  140.50   83.12  188.43  -96.88 
1 1 1   10    6   40 0.00  177.01   85.82  280.29   85.82  250.41   85.51   44.13  -94.49 
1 1 1   10    6   41 0.00   96.13   71.71  157.64   71.71   18.32    1.52   48.19 -178.48 
1 1 1   10    6   42 0.00   94.51   54.44   73.04   54.44   32.13  -10.74  103.06  -10.74 
1 1 1   10    6   43 0.00  118.69   77.04  146.01   77.04   71.17 -111.74  101.11   68.26 
1 1 1   10    6   44 0.00   98.33   57.84   83.87   57.84    2.43  -38.80   55.13  141.20 
1 1 1   10    6   45 0.00   81.65   49.79   72.94   49.79   51.37    6.66  220.38    6.66 
1 1 1   10    7    1 0.00  752.99   14.39  738.97   14.39  410.35   49.78   86.46   49.78 
1 1 1   10    7    2 0.00  981.59   14.48  962.35   14.48  488.17   85.42   50.46  -94.58 
1 1 1   10    7    3 0.00 1434.47   16.04 1445.08   16.04  692.45 -163.11  191.19   16.89 
1 1 1   10    7    4 0.00  726.63   16.16  732.46   16.16  368.69   17.42    0.33 -162.58 
1 1 1   10    7    5 0.00 1066.88   16.41 1069.23   16.41  646.92  105.00  141.71  105.00 
1 1 1   10    7    6 0.00 1504.16   17.18 1536.36   17.18  669.11  -78.60  374.45  101.40 
1 1 1   10    7    7 0.00  483.52   18.80  499.00   18.80  186.96 -108.52    0.95   71.48 
1 1 1   10    7    8 0.00  812.91   18.42  813.54   18.42  470.43  -56.05   46.30  -56.05 
1 1 1   10    7    9 1.00 1645.64   19.35 1661.12   19.35  898.68  146.18  178.34  -33.82 
1 1 1   10    7   10 0.00  289.36   28.32  263.58   28.32   18.84   73.78  251.48   73.78 
1 1 1   10    7   11 1.00  802.23   19.18  787.08   19.18  536.52  115.20  151.01  115.20 
1 1 1   10    7   12 0.00  846.30   19.99  862.67   19.99  655.49 -159.70  210.33 -159.70 
1 1 1   10    7   13 0.00 1055.04   18.09 1083.62   18.09  687.52   55.65   66.41 -124.35 
1 1 1   10    7   14 0.00  817.86   22.61  847.83   22.61  593.22   38.38   79.98   38.38 
1 1 1   10    7   15 0.00  750.24   20.90  760.54   20.90  533.04  -27.27   43.32  -27.27 
1 1 1   10    7   16 0.00  506.16   21.66  519.40   21.66  296.83   75.25   72.62 -104.75 
1 1 1   10    7   17 0.00  529.83   20.67  510.04   20.67  146.36   53.52  399.78 -126.48 
1 1 1   10    7   18 0.00  524.13   20.38  500.21   20.38  393.73 -129.62  200.06 -129.62 
1 1 1   10    7   19 0.00 1115.81   16.21 1135.39   16.21  867.95  121.46  125.30  121.46 
1 1 1   10    7   20 0.00  845.14   18.39  835.49   18.39  561.96  102.01   80.71  -77.99 
1 1 1   10    7   21 0.00  340.72   29.11  276.92   29.11   78.71  103.12  189.25  -76.88 
1 1 1   10    7   22 1.00  494.42   24.00  463.73   24.00  275.54 -166.73  103.74   13.27 
1 1 1   10    7   23 0.00 1048.25   17.91 1086.85   17.91  672.79   52.67  226.77 -127.33 
1 1 1   10    7   24 0.00  413.67   30.65  376.23   30.65  127.17   24.13  277.80 -155.87 
1 1 1   10    7   25 0.00 1155.14   18.10 1187.90   18.10  958.50  -64.90  131.05  -64.90 
1 1 1   10    7   26 0.00  486.54   28.49  502.77   28.49  224.73 -144.61  275.05   35.39 
1 1 1   10    7   27 0.00  782.07   22.28  828.15   22.28  534.25 -151.46  191.91   28.54 
1 1 1   10    7   28 1.00  295.46   43.50  344.87   43.50  148.61 -116.43   49.27   63.57 
1 1 1   10    7   29 0.00  424.70   40.97  350.61   40.97  273.61 -153.53   69.10 -153.53 
1 1 1   10    7   30 0.00  315.54   54.52  392.24   54.52  211.71   -2.98   53.85  177.02 
1 1 1   10    7   31 0.00  465.92   36.80  534.30   36.80  268.66   37.45  288.95 -142.55 
1 1 1   10    7   32 0.00  264.22   64.73  213.97   64.73   43.55  -69.08   38.70  110.92 
1 1 1   10    7   33 0.00  250.02   73.40  162.52   73.40   23.11   64.99  136.07 -115.01 
1 1 1   10    7   34 0.00  198.59   76.17  122.97   76.17   32.76  -79.61  172.86  -79.61 
1 1 1   10    7   35 0.00  129.27   71.87  132.30   71.87   50.12   -9.47  160.48   -9.47 
1 1 1   10    7   36 0.00  308.62   69.74  271.67   69.74  242.45  164.02   36.71  164.02 
1 1 1   10    7   37 0.00  106.35   65.61   97.47   65.61   87.56 -122.49  268.08 -122.49 
1 1 1   10    7   38 0.00  157.41   71.70   88.11   71.70    1.21    8.81   65.77 -171.19 
1 1 1   10    7   39 0.00  128.29   73.38  134.00   73.38    0.26 -161.23  117.01 -161.23 
1 1 1   10    7   40 1.00  130.00   77.38  151.84   77.38   19.39  -59.77   86.73  120.23 
1 1 1   10    7   41 1.00  142.13   77.54  142.63   77.54   41.35  -36.63   41.85  143.37 
1 1 1   10    7   42 0.00  132.18   79.66  136.77   79.66   41.14 -144.93  116.32   35.07 
1 1 1   10    7   43 0.00  103.13   71.67  132.49   71.67   16.16 -100.97   39.17   79.03 
1 1 1   10    7   44 0.00   86.16   55.99   89.54   55.99   12.44   -2.90  151.89   -2.90 
1 1 1   10    7   45 1.00   91.19   56.39   89.51   56.39    1.62  166.88   77.58  166.88 
1 1 1   10    8    1 0.00 2285.06   14.37 2244.25   14.37 1097.80  -18.31  286.13  161.69 
1 1 1   10    8    2 0.00 2640.98   12.74 2700.89   12.74 1405.75  145.37  132.62  -34.63 
1 1 1   10    8    3 0.00 2306.12   13.37 2358.20   13.37 1468.59  129.01  361.31  129.01 
1 1 1   10    8    4 0.00  801.66   15.42  795.40   15.42  531.20  109.72  358.27  109.72 
1 1 1   10    8    5 0.00 2043.39   15.48 2070.26   15.48 1276.59 -164.68  250.00 -164.68 
1 1 1   10    8    6 0.00  975.91   17.82  991.94   17.82  472.97  110.65  157.42  -69.35 
1 1 1   10    8    7 0.00 1571.59   17.03 1597.93   17.03  934.87 -110.52   26.12 -110.52 
1 1 1   10    8    8 0.00 1286.44   18.74 1262.81   18.74  675.12  168.28  137.56  -11.72 
1 1 1   10    8    9 0.00 1424.17   20.49 1406.33   20.49  775.52  -48.42  140.60  131.58 
1 1 1   10    8   10 0.00  931.24   24.54  903.05   24.54  566.01  144.34   53.54  144.34 
1 1 1   10    8   11 0.00 1473.44   25.68 1477.18   25.68  866.74   85.92   74.57  -94.08 
1 1 1   10    8   12 0.00  679.44   18.60  705.63   18.60  482.89    7.99   99.84    7.99 
1 1 1   10    8   13 0.00  870.37   23.47  833.85   23.47  624.54   67.66  132.10   67.66 
1 1 1   10    8   14 0.00 1318.21   19.62 1275.32   19.62  857.53  -18.00   71.08  162.00 
1 1 1   10    8   15 0.00  459.17   21.81  453.68   21.81  306.15  118.44  132.65  118.44 
1 1 1   10    8   16 0.00  271.01   26.07  295.07   26.07   54.30  166.51   52.67  -13.49 
1 1 1   10    8   17 1.00  200.13   31.67  242.32   31.67    0.15 -135.92   38.62   44.08 
1 1 1   10    8   18 1.00  976.79   17.45  965.34   17.45  585.00   11.43  197.32 -168.57 
1 1 1   10    8   19 0.00 1022.64   17.31 1037.88   17.31  871.57  104.71  281.37  104.71 
1 1 1   10    8   20 0.00  684.59   19.45  657.92   19.45  519.29   51.16  109.42   51.16 
1 1 1   10    8   21 0.00  443.69   24.34  430.02   24.34  158.86 -124.64  274.20   55.36 
1 1 1   10    8   22 0.00 1170.81   17.57 1175.37   17.57 1085.99  -54.63  421.74  -54.63 
1 1 1   10    8   23 0.00  466.87   25.25  444.49   25.25  226.93   17.26  158.93 -162.74 
1 1 1   10    8   24 0.00 1551.15   17.32 1528.25   17.32 1076.11  -92.25  174.53   87.75 
1 1 1   10    8   25 0.00  736.79   21.86  726.04   21.86  391.52  142.21  313.78  -37.79 
1 1 1   10    8   26 0.00 1009.30   19.87 1011.17   19.87  856.57  126.37  153.15  126.37 
1 1 1   10    8   27 0.00  427.59   32.60  386.44   32.60  279.44  132.95   21.80  132.95 
1 1 1   10    8   28 0.00 1132.91   20.59 1159.41   20.59 1121.39   83.80  396.39   83.80 
1 1 1   10    8   29 0.00  218.18   54.19  285.00   54.19    4.01 -148.05  318.02 -148.05 
1 1 1   10    8   30 0.00  727.29   25.22  772.60   25.22  638.00  -14.22   31.18  -14.22 
1 1 1   10    8   31 0.00  499.50   34.81  587.63   34.81  502.44  -50.69  118.63  -50.69 
1 1 1   10    8   32 0.00  392.49   47.03  354.83   47.03  219.68 -127.85  162.96   52.15 
1 1 1   10    8   33 0.00  515.33   35.47  556.41   35.47  491.19  116.19   45.21  116.19 
1 1 1   10    8   34 0.00  124.90   72.70  275.46   72.70   22.58  -48.92  148.28  131.08 
1 1 1   10    8   35 0.00  192.01   71.54  305.82   71.54  116.71  161.66   74.68  -18.34 
1 1 1   10    8   36 0.00  229.58   80.11  205.48   80.11   91.36   61.87   58.23 -118.13 
1 1 1   10    8   37 0.00  128.26   73.19  133.75   73.19   54.78  131.44  290.31  131.44 
1 1 1   10    8   38 0.00  467.38   56.57  437.13   56.57  797.06  -48.80  442.18  -48.80 
1 1 1   10    8   39 0.00  157.48   76.09  127.73   76.09    2.09   48.30  232.69 -131.70 
1 1 1   10    8   40 1.00  202.27   83.88  235.02   83.88  253.06   28.04    7.54 -151.96 
1 1 1   10    8   41 0.00   93.95   61.54  101.40   61.54   19.95  -46.32   92.02  -46.32 
1 1 1   10    8   42 0.00  115.13   76.61  139.15   76.61   25.83  136.62  146.02  -43.38 
1 1 1   10    8   43 0.00  117.92   73.74  129.41   73.74   43.67  118.27  122.36  -61.73 
1 1 1   10    8   44 0.00   90.31   54.68   80.09   54.68   18.06  102.04  152.96  102.04 
1 1 1   10    8   45 0.00   90.46   56.32   90.42   56.32    1.34 -120.17   74.93 -120.17 
1 1 1   10    9    1 0.00 1560.13   14.49 1551.38   14.49 1091.56  149.19  518.51  149.19 
1 1 1   10    9    2 0.00 2641.50   12.00 2664.97   12.00 1597.22 -137.50  279.49 -137.50 
1 1 1   10    9    3 0.00 1726.39   14.68 1739.45   14.68  859.13  -20.87  184.36  159.13 
1 1 1   10    9    4 0.00 1710.66   15.08 1710.23   15.08 1099.21   53.21  268.04   53.21 
1 1 1   10    9    5 0.00 2700.39   12.08 2631.29   12.08 1594.35   44.49  116.12   44.49 
1 1 1   10    9    6 0.00  135.81   31.09  113.74   31.09  165.73  162.45  364.79  162.45 
1 1 1   10    9    7 1.00 2434.38   15.12 2419.63   15.12 1463.05  108.92   73.95  108.92 
1 1 1   10    9    8 0.00 1397.78   16.92 1386.48   16.92  923.27  153.95  210.98  153.95 
1 1 1   10    9    9 0.00 1190.39   18.43 1227.85   18.43  750.42 -176.62   69.90 -176.62 
1 1 1   10    9   10 0.00 1274.59   23.26 1287.40   23.26  786.72  146.51   33.97  146.51 
1 1 1   10    9   11 0.00  662.30   24.54  648.63   24.54  512.41   35.40  348.96   35.40 
1 1 1   10    9   12 0.00 1231.30   20.73 1259.77   20.73  949.73  -89.82  239.17  -89.82 
1 1 1   10    9   13 0.00 1068.01   21.50 1073.39   21.50  802.58 -119.14  172.31 -119.14 
1 1 1   10    9   14 0.00  325.82   30.34  346.33   30.34   89.07    2.07  195.97 -177.93 
1 1 1   10    9   15 0.00  608.23   18.92  593.51   18.92  422.02 -123.10   62.63 -123.10 
1 1 1   10    9   16 0.00  369.67   22.00  396.61   22.00  138.03  170.23  175.82   -9.77 
1 1 1   10    9   17 0.00  792.49   18.57  763.33   18.57  668.64  -85.52  302.61  -85.52 
1 1 1   10    9   18 0.00  601.37   21.29  582.99   21.29  410.81  -29.53   38.36  -29.53 
1 1 1   10    9   19 0.00  405.71   24.20  367.10   24.20  147.03 -174.29  186.56    5.71 
1 1 1   10    9   20 0.00  949.08   17.99  953.14   17.99  700.97  -22.26   33.35  -22.26 
1 1 1   10    9   21 0.00 1292.87   17.72 1294.57   17.72 1180.09  -97.13  453.51  -97.13 
1 1 1   10    9   22 1.00  807.58   19.35  836.73   19.35  593.40  -33.76   20.72  -33.76 
1 1 1   10    9   23 0.00  621.86   21.45  631.58   21.45  426.54  121.63   27.39  -58.37 
1 1 1   10    9   24 0.00  760.15   21.26  772.98   21.26  487.44   68.78  151.79 -111.22 
1 1 1   10    9   25 0.00 1589.49   17.63 1540.37   17.63 1184.37  118.38   35.57  -61.62 
1 1 1   10    9   26 0.00   69.13   54.84  235.66   54.84   67.26   61.87  243.13   61.87 
1 1 1   10    9   27 0.00  866.37   22.10  916.60   22.10  823.67    2.40  262.26    2.40 
1 1 1   10    9   28 0.00  713.06   25.43  664.17   25.43  447.90  -33.57  189.94  146.43 
1 1 1   10    9   29 0.00  686.20   27.71  729.90   27.71  626.42 -101.21  119.72 -101.21 
1 1 1   10    9   30 0.00  493.33   35.20  510.84   35.20  358.83 -104.02   75.54   75.98 
1 1 1   10    9   31 0.00  382.80   43.28  506.31   43.28  261.53 -160.35  200.02   19.65 
1 1 1   10    9   32 0.00  403.54   49.62  384.13   49.62  314.41   46.02  194.83   46.02 
1 1 1   10    9   33 0.00   90.91   68.14  139.63   68.14   97.00  -46.95  258.16  -46.95 
1 1 1   10    9   34 0.00  473.99   45.15  465.87   45.15  484.56   58.50  165.84   58.50 
1 1 1   10    9   35 0.00  137.87   74.13  133.52   74.13   68.72  152.49  228.15  152.49 
1 1 1   10    9   36 0.00  348.68   72.57  209.97   72.57  193.42  -56.11   81.99  123.89 
1 1 1   10    9   37 0.00  125.46   79.14  164.00   79.14    7.67   48.93   13.43 -131.07 
1 1 1   10    9   38 0.00  187.17   86.41  158.98   86.41   93.13  -19.20  118.73  160.80 
1 1 1   10    9   39 0.00  196.99   85.69  172.38   85.69  125.17 -138.01   59.63   41.99 
1 1 1   10    9   40 0.00  113.94   69.47  115.43   69.47    6.65   76.61   70.59   76.61 
1 1 1   10    9   41 0.00  124.24   78.56  147.98   78.56    7.16   15.47    9.45 -164.53 
1 1 1   10    9   42 0.00  106.72   72.15  120.13   72.15    2.14    7.28  117.48    7.28 
1 1 1   10    9   43 0.00  132.20   79.88  143.48   79.88  124.24  -92.72   92.11   87.28 
1 1 1   10    9   44 0.00   97.32   58.54   88.14   58.54    3.00    1.25  122.31 -178.75 
1 1 1   10    9   45 0.00   89.72   55.19   86.35   55.19    7.26   73.58  101.08   73.58 
1 1 1   11    1    1 0.00 2023.12   26.15 2038.55   26.15  899.60  154.17  493.72  -25.83 
1 1 1   11    1    2 0.00 1711.85   24.88 1733.00   24.88 1112.70 -178.48  313.55 -178.48 
1 1 1   11    1    3 0.00 2234.58   27.62 2233.22   27.62 1256.84   66.03   20.43 -113.97 
1 1 1   11    1    4 0.00  492.18   18.60  493.81   18.60  123.10  116.27  219.41  -63.73 
1 1 1   11    1    5 0.00 2193.32   26.02 2209.96   26.02 1244.28   73.36    6.45 -106.64 
1 1 1   11    1    6 1.00 1927.52   20.94 1930.84   20.94 1084.01   -3.38   18.99  176.62 
1 1 1   11    1    7 0.00  108.15   28.23  129.36   28.23  190.66  110.42  415.20  110.42 
1 1 1   11    1    8 0.00 1484.33   21.07 1474.48   21.07  817.38  159.46   47.70  -20.54 
1 1 1   11    1    9 0.00 1172.95   17.37 1161.38   17.37  647.01   84.16   58.80  -95.84 
1 1 1   11    1   10 0.00 2015.77   18.12 1999.47   18.12 1343.52 -159.27  289.04 -159.27 
1 1 1   11    1   11 0.00 1019.76   18.88 1006.42   18.88  488.07   81.93  228.21  -98.07 
1 1 1   11    1   12 0.00 1357.40   18.89 1382.54   18.89  834.64  107.06    7.47  107.06 
1 1 1   11    1   13 0.00 1203.11   18.45 1182.89   18.45  731.22   47.62  121.47 -132.38 
1 1 1   11    1   14 0.00  849.16   17.07  815.43   17.07  563.93 -165.69   45.41 -165.69 
1 1 1   11    1   15 0.00 1164.44   16.82 1172.93   16.82  740.15  -34.98  105.19  145.02 
1 1 1   11    1   16 0.00  890.78   16.74  877.81   16.74  539.78  158.19  126.00  -21.81 
1 1 1   11    1   17 0.00  904.27   16.90  918.91   16.90  630.84   89.30    5.21   89.30 
1 1 1   11    1   18 0.00  178.98   43.42  211.85   43.42   53.89   51.28  232.51   51.28 
1 1 1   11    1   19 0.00  503.92   25.67  490.13   25.67  296.84   63.45   36.19 -116.55 
1 1 1   11    1   20 0.00  839.67   19.82  828.28   19.82  430.41 -115.11  307.12   64.89 
1 1 1   11    1   21 0.00 1502.05   16.18 1471.47   16.18 1310.48  -95.34  478.37  -95.34 
1 1 1   11    1   22 0.00  643.34   21.95  615.42   21.95  566.74  153.52  306.58  153.52 
1 1 1   11    1   23 0.00 1035.26   17.73 1034.05   17.73  739.21  -52.19    7.01  -52.19 
1 1 1   11    1   24 0.00 1737.94   16.02 1773.39   16.02 1280.53   52.10   16.89 -127.90 
1 1 1   11    1   25 0.00  566.50   25.29  562.95   25.29  388.36  -68.66    6.87  111.34 
1 1 1   11    1   26 0.00  609.20   25.24  548.43   25.24  168.73  -68.43  510.26  111.57 
1 1 1   11    1   27 0.00 1628.21   17.21 1636.80   17.21 1203.57  162.47  123.19  -17.53 
1 1 1   11    1   28 0.00  533.73   27.61  629.96   27.61  483.94   16.31  120.31   16.31 
1 1 1   11    1   29 0.00  400.17   38.65  437.56   38.65  175.42   86.81  261.05  -93.19 
1 1 1   11    1   30 0.00  654.40   29.01  736.05   29.01  504.80 -126.97  101.80   53.03 
1 1 1   11    1   31 0.00  132.72   77.20  178.89   77.20   99.50  164.37  315.57  164.37 
1 1 1   11    1   32 0.00  589.45   35.83  604.67   35.83  561.74   25.17  143.73   25.17 
1 1 1   11    1   33 0.00  201.83   78.69  123.27   78.69   20.38  -56.49  120.09  -56.49 
1 1 1   11    1   34 0.00  171.55   77.48  125.61   77.48   31.02  129.72  123.48  129.72 
1 1 1   11    1   35 0.00  362.53   61.24  264.07   61.24   93.65 -169.12  336.89   10.88 
1 1 1   11    1   36 0.00  228.01   76.19   91.43   76.19    7.51   -0.45  112.14   -0.45 
1 1 1   11    1   37 0.00  171.44   78.78  147.83   78.78   24.88 -171.87   72.18    8.13 
1 1 1   11    1   38 1.00  210.40   82.30  148.49   82.30  100.03  -20.29   15.21  159.71 
1 1 1   11    1   39 0.00  209.92   80.32  166.93   80.32  135.71  -93.56   24.05   86.44 
1 1 1   11    1   40 0.00   80.26   60.25  107.11   60.25   22.99 -120.38   74.34 -120.38 
1 1 1   11    1   41 1.00   73.77   56.97  100.49   56.97   69.48  -89.25  212.52  -89.25 
1 1 1   11    1   42 0.00  129.08   74.44  141.64   74.44   19.24  -79.33   28.25  100.67 
1 1 1   11    1   43 0.00  134.51   70.10   90.41   70.10    0.89 -133.47  217.00 -133.47 
1 1 1   11    1   44 0.00   87.28   57.03   92.57   57.03   11.28  139.29  109.45  139.29 
1 1 1   11    1   45 0.00   82.76   50.68   74.92   50.68   58.48  138.59  253.21  138.59 
1 1 1   11    2    1 0.00  298.34   22.76  318.01   22.76   16.88  -88.55  201.64  -88.55 
1 1 1   11    2    2 0.00 1418.80   22.18 1421.08   22.18  761.71   55.92   55.44 -124.08 
1 1 1   11    2    3 0.00 2401.83   29.89 2356.39   29.89 1468.76   94.86  262.19   94.86 
1 1 1   11    2    4 0.00 1807.81   21.19 1810.84   21.19  917.48   -5.15  191.88  174.85 
1 1 1   11    2    5 0.00 1857.26   21.04 1855.63   21.04 1113.53  -29.28  145.37  -29.28 
1 1 1   11    2    6 0.00 1045.25   17.42 1054.20   17.42  448.36 -158.51  260.51   21.49 
1 1 1   11    2    7 0.00 1143.29   17.78 1141.99   17.78  591.69 -153.92   85.96   26.08 
1 1 1   11    2    8 0.00  750.86   16.50  734.85   16.50  381.45  100.76   17.26  -79.24 
1 1 1   11    2    9 0.00  769.53   17.05  761.53   17.05  209.61   66.06  447.01 -113.94 
1 1 1   11    2   10 0.00  895.51   17.13  888.25   17.13  345.75 -142.01  337.99   37.99 
1 1 1   11    2   11 0.00 1198.30   20.85 1202.14   20.85  749.15  165.58   65.75  165.58 
1 1 1   11    2   12 0.00 1975.15   17.31 1991.65   17.31 1296.90   10.18  163.14   10.18 
1 1 1   11    2   13 0.00  534.24   19.09  526.98   19.09  294.03   36.60   35.84 -143.40 
1 1 1   11    2   14 0.00 1506.68   17.06 1491.82   17.06 1127.33  -58.11  226.36  -58.11 
1 1 1   11    2   15 0.00 1113.28   16.89 1118.50   16.89  895.31  111.80  289.18  111.80 
1 1 1   11    2   16 0.00  646.50   18.65  654.83   18.65  533.66  131.38  236.50  131.38 
1 1 1   11    2   17 0.00  889.31   19.13  873.44   19.13  533.14  -36.18  155.01  143.82 
1 1 1   11    2   18 0.00  593.56   19.32  606.71   19.32  484.65  -75.54  224.28  -75.54 
1 1 1   11    2   19 0.00 1073.36   19.24 1031.31   19.24  734.63  112.74    0.66  112.74 
1 1 1   11    2   20 0.00 1255.86   17.65 1245.04   17.65  870.07  -96.49   42.14   83.51 
1 1 1   11    2   21 0.00  986.39   18.68 1033.70   18.68  769.28  136.14   93.70  136.14 
1 1 1   11    2   22 0.00  245.15   49.33  179.89   49.33    8.45  103.47  120.16  103.47 
1 1 1   11    2   23 0.00  971.88   17.81  994.39   17.81  679.45  -59.76   43.93  120.24 
1 1 1   11    2   24 0.00  341.23   43.12  222.33   43.12   72.31   43.75   51.56 -136.25 
1 1 1   11    2   25 0.00 1601.73   16.41 1635.82   16.41 1210.63 -129.34    7.29   50.66 
1 1 1   11    2   26 0.00  459.06   30.44  421.46   30.44  237.62  139.31  125.60  -40.69 
1 1 1   11    2   27 0.00  378.59   35.45  390.51   35.45  235.44   51.43   16.49 -128.57 
1 1 1   11    2   28 0.00 1321.84   17.95 1308.81   17.95 1019.31  -12.77   44.10  167.23 
1 1 1   11    2   29 0.00  375.16   39.37  444.64   39.37  296.02  -75.10  120.09  -75.10 
1 1 1   11    2   30 0.00  574.71   30.43  598.29   30.43  443.42  -36.03   34.43  143.97 
1 1 1   11    2   31 1.00  610.33   28.93  591.15   28.93  338.37   59.15  310.59 -120.85 
1 1 1   11    2   32 0.00  211.29   74.50  174.93   74.50    0.52 -139.89   86.54   40.11 
1 1 1   11    2   33 0.00  704.86   32.11  740.18   32.11  830.10 -174.32  413.63 -174.32 
1 1 1   11    2   34 0.00  144.30   76.75  134.16   76.75   53.49 -139.15  176.46 -139.15 
1 1 1   11    2   35 0.00  186.37   79.47  230.32   79.47   43.87   41.99  379.37   41.99 
1 1 1   11    2   36 0.00  283.09   74.67  239.59   74.67  112.91   63.58  171.97 -116.42 
1 1 1   11    2   37 0.00  138.07   70.87   88.59   70.87   25.37   41.69  106.85   41.69 
1 1 1   11    2   38 0.00  248.02   72.98  352.00   72.98  267.30 -156.09  196.89   23.91 
1 1 1   11    2   39 0.00  134.36   72.03  120.44   72.03   15.71 -162.76  196.13 -162.76 
1 1 1   11    2   40 0.00  103.69   70.57  144.90   70.57  103.01  123.01  448.77  123.01 
1 1 1   11    2   41 1.00  116.38   65.96  100.85   65.96    4.54 -177.85   29.37 -177.85 
1 1 1   11    2   42 0.00   97.67   61.05   99.54   61.05   36.33  118.49  166.35  118.49 
1 1 1   11    2   43 0.00   91.87   67.72  125.95   67.72    6.74 -104.03  121.74   75.97 
1 1 1   11    2   44 0.00   89.88   57.82   93.35   57.82    2.26  164.30   42.99  164.30 
1 1 1   11    2   45 0.00   90.06   55.48   86.70   55.48    1.61   41.71   44.33   41.71 
1 1 1   11    3    1 0.00 1188.09   22.22 1204.90   22.22  638.43  -19.13   32.25  160.87 
1 1 1   11    3    2 0.00 1453.65   22.58 1460.54   22.58  980.62    1.92  366.60    1.92 
1 1 1   11    3    3 0.00 1832.12   21.28 1774.94   21.28 1019.52   67.16   37.19   67.16 
1 1 1   11    3    4 1.00 2352.90   21.94 2330.02   21.94 1258.97  -12.11  102.66  167.89 
1 1 1   11    3    5 0.00 3491.14   17.44 3386.74   17.44 1950.60  177.99   20.53  177.99 
1 1 1   11    3    6 0.00 1660.62   18.82 1643.45   18.82  894.57  174.26   62.28   -5.74 
1 1 1   11    3    7 0.00 1565.41   18.49 1593.56   18.49  894.84   35.05   10.55   35.05 
1 1 1   11    3    8 1.00  472.04   16.97  512.98   16.97   88.56  169.58   32.54  169.58 
1 1 1   11    3    9 0.00  505.96   17.70  508.12   17.70  188.39  -91.39   97.50   88.61 
1 1 1   11    3   10 0.00  801.37   17.09  794.16   17.09  399.86  146.07   95.94  -33.93 
1 1 1   11    3   11 0.00 1464.79   22.95 1465.55   22.95  901.75   63.06   38.03   63.06 
1 1 1   11    3   12 0.00 1527.10   17.49 1567.31   17.49  972.46   18.98   56.40   18.98 
1 1 1   11    3   13 0.00 2139.20   17.06 2077.53   17.06 1446.71  -79.00   43.45  -79.00 
1 1 1   11    3   14 0.00  746.93   19.54  739.30   19.54  553.95   89.69  165.22   89.69 
1 1 1   11    3   15 0.00  738.44   18.05  735.94   18.05  623.89  116.04  333.59  116.04 
1 1 1   11    3   16 0.00 1056.61   18.29 1091.29   18.29  828.59  -63.68  177.51  -63.68 
1 1 1   11    3   17 0.00  297.24   33.57  269.39   33.57   38.95   18.86  202.10 -161.14 
1 1 1   11    3   18 0.00 1145.83   18.92 1178.30   18.92  950.77   50.01  297.89   50.01 
1 1 1   11    3   19 0.00  835.00   19.30  873.60   19.30  473.47  171.13  242.05   -8.87 
1 1 1   11    3   20 0.00 1666.43   17.22 1681.14   17.22 1141.37  -43.35  128.67  136.65 
1 1 1   11    3   21 0.00  832.19   18.40  837.01   18.40  616.00 -144.98   47.90 -144.98 
1 1 1   11    3   22 0.00 2003.38   14.58 2060.58   14.58 1910.76  -22.51  804.09  -22.51 
1 1 1   11    3   23 0.00  625.39   22.51  627.80   22.51  348.88  -53.16  172.52  126.84 
1 1 1   11    3   24 0.00  522.76   24.30  533.15   24.30  366.21   69.38   21.95   69.38 
1 1 1   11    3   25 0.00  222.05   55.16  192.34   55.16   37.65  129.10  243.68  129.10 
1 1 1   11    3   26 0.00 1195.94   17.29 1227.81   17.29  877.52   32.10   94.08 -147.90 
1 1 1   11    3   27 1.00  546.23   27.38  515.55   27.38  470.38 -104.60  211.68 -104.60 
1 1 1   11    3   28 0.00  441.92   32.37  476.85   32.37  225.36   -6.28  223.68  173.72 
1 1 1   11    3   29 0.00  334.78   43.79  369.36   43.79  160.77    5.33  151.33 -174.67 
1 1 1   11    3   30 0.00  153.63   68.80  142.24   68.80   92.50  119.99  271.99  119.99 
1 1 1   11    3   31 0.00   89.81   68.68  177.23   68.68  130.12   36.05  357.14   36.05 
1 1 1   11    3   32 0.00  584.39   31.55  611.69   31.55  465.80 -101.22   79.52   78.78 
1 1 1   11    3   33 0.00  459.91   39.24  453.36   39.24  385.53   28.98   14.81   28.98 
1 1 1   11    3   34 0.00  145.37   78.86  155.90   78.86   15.64  -52.67   64.75  -52.67 
1 1 1   11    3   35 0.00  126.65   72.38  127.70   72.38  100.58  157.98  284.89  157.98 
1 1 1   11    3   36 0.00  368.79   63.03  298.20   63.03  267.75  -81.42  171.67  -81.42 
1 1 1   11    3   37 0.00  226.25   84.76  214.38   84.76  169.54  129.62   67.66  -50.38 
1 1 1   11    3   38 0.00  173.90   80.05  135.34   80.05   37.13   29.36  190.49 -150.64 
1 1 1   11    3   39 0.00  181.42   82.70  165.49   82.70   96.69  -95.68   53.75   84.32 
1 1 1   11    3   40 0.00   76.23   73.21  175.95   73.21    4.45  -61.51   29.11  118.49 
1 1 1   11    3   41 0.00   98.72   59.50   86.77   59.50   59.73  -16.28  199.54  -16.28 
1 1 1   11    3   42 0.00  107.24   60.92   86.18   60.92   56.79   13.37  233.14   13.37 
1 1 1   11    3   43 0.00  106.12   66.44  108.25   66.44    3.35   92.96   82.70  -87.04 
1 1 1   11    3   44 0.00   95.78   59.71   94.64   59.71    7.78 -104.00   53.48   76.00 
1 1 1   11    3   45 0.00   74.96   49.57   78.67   49.57   28.08  150.12  126.49  150.12 
1 1 1   11    4    1 0.00 1035.09   20.08 1042.03   20.08  486.60 -108.09  144.42   71.91 
1 1 1   11    4    2 0.00  303.69   18.48  296.32   18.48  125.94  -79.51  494.80  -79.51 
1 1 1   11    4    3 1.00 1010.70   17.87  986.78   17.87  477.22  -89.41  114.42   90.59 
1 1 1   11    4    5 0.00 2433.01   18.65 2481.87   18.65 1353.53  -82.49   46.61   97.51 
1 1 1   11    4    6 0.00 2688.76   15.79 2700.68   15.79 1469.11   38.30  106.52 -141.70 
1 1 1   11    4    7 0.00 1383.27   17.11 1416.66   17.11  846.23   16.37  130.01   16.37 
1 1 1   11    4    8 0.00 1246.46   18.35 1240.48   18.35  701.92  -72.05   25.76  107.95 
1 1 1   11    4    9 0.00 1405.80   18.17 1440.25   18.17  928.97   99.12  198.72   99.12 
1 1 1   11    4   10 1.00 1422.87   18.04 1387.66   18.04  886.12   87.95  100.49   87.95 
1 1 1   11    4   11 0.00  927.25   20.10  943.79   20.10  430.32  -78.52  249.44  101.48 
1 1 1   11    4   12 0.00 2247.76   18.29 2231.02   18.29 1547.43  -53.20  339.94  -53.20 
1 1 1   11    4   13 0.00  664.86   19.16  655.92   19.16  315.77 -110.97  210.65   69.03 
1 1 1   11    4   14 0.00  630.99   18.32  612.45   18.32  430.56  117.00  102.19  117.00 
1 1 1   11    4   15 0.00 1135.55   18.75 1149.72   18.75  728.33  -24.62  102.84  155.38 
1 1 1   11    4   16 0.00 1057.67   18.70 1075.28   18.70  794.99   70.44  116.20   70.44 
1 1 1   11    4   17 0.00  777.01   19.84  830.77   19.84  455.35    7.09  204.03 -172.91 
1 1 1   11    4   18 0.00  672.95   23.36  711.29   23.36  600.18  -54.36  308.68  -54.36 
1 1 1   11    4   19 0.00 1173.64   17.31 1215.48   17.31 1006.48  -86.86  334.30  -86.86 
1 1 1   11    4   20 0.00  301.24   33.22  296.46   33.22   69.64  162.68  169.95  -17.32 
1 1 1   11    4   21 0.00 1065.74   18.72 1075.66   18.72  833.90 -146.00  121.23 -146.00 
1 1 1   11    4   22 0.00  111.58   58.98  137.33   58.98   93.53 -149.91  231.59 -149.91 
1 1 1   11    4   23 0.00  749.10   20.39  821.07   20.39  385.41  -49.77  352.40  130.23 
1 1 1   11    4   24 0.00  221.66   43.94  292.25   43.94    6.35   29.99  254.12 -150.01 
1 1 1   11    4   25 0.00  232.45   52.21  195.83   52.21   42.27   61.31  280.57   61.31 
1 1 1   11    4   26 0.00  403.84   31.27  424.65   31.27  245.39  153.91   54.44  -26.09 
1 1 1   11    4   27 0.00  494.21   29.52  576.41   29.52  488.04  -69.19  246.08  -69.19 
1 1 1   11    4   28 0.00  441.89   33.28  462.11   33.28  172.28    0.71  327.62 -179.29 
1 1 1   11    4   29 0.00   92.56   63.85  159.05   63.85  192.41   61.86  484.82   61.86 
1 1 1   11    4   30 0.00  513.47   30.73  530.64   30.73  324.10 -176.66  175.22    3.34 
1 1 1   11    4   31 0.00  576.22   28.77  647.92   28.77  592.11  100.82  200.74  100.82 
1 1 1   11    4   32 0.00  467.91   37.92  534.07   37.92  401.44   -0.71   22.63  179.29 
1 1 1   11    4   33 0.00  504.58   38.40  516.22   38.40  461.61   82.76   56.29   82.76 
1 1 1   11    4   34 0.00  226.53   76.76  222.05   76.76   47.36  -98.61  146.16   81.39 
1 1 1   11    4   35 0.00  156.83   81.58  218.88   81.58   22.35  -68.05  242.28  -68.05 
1 1 1   11    4   36 0.00   69.15   66.81  148.35   66.81  121.78  -54.67  347.67  -54.67 
1 1 1   11    4   37 0.00  173.60   76.42  284.38   76.42  191.02  122.79   47.48  122.79 
1 1 1   11    4   38 0.00  287.32   84.25  201.33   84.25  265.32 -110.61   10.06   69.39 
1 1 1   11    4   39 0.00  103.11   76.08  165.45   76.08   10.30 -134.37  223.41 -134.37 
1 1 1   11    4   40 0.00   85.04   60.66  104.41   60.66   59.89  107.11  191.02  107.11 
1 1 1   11    4   41 0.00  131.93   67.82   89.95   67.82   12.08  -42.81  146.69  -42.81 
1 1 1   11    4   42 0.00  106.39   61.66   92.08   61.66   50.20 -121.98  223.72 -121.98 
1 1 1   11    4   43 0.00  109.62   67.72  109.01   67.72    3.28   32.33   27.31 -147.67 
1 1 1   11    4   44 0.00   95.09   58.28   88.50   58.28    2.14  -60.02  101.35  119.98 
1 1 1   11    4   45 1.00   89.53   57.96   96.56   57.96    3.80 -141.63   60.42   38.37 
1 1 1   11    5    1 0.00 1598.70   18.37 1587.18   18.37  964.29   63.65  193.64   63.65 
1 1 1   11    5    2 0.00 2054.79   18.88 2059.65   18.88 1180.22   82.79   98.65   82.79 
1 1 1   11    5    3 0.00 1569.34   17.82 1574.95   17.82  948.66 -158.11  182.47 -158.11 
1 1 1   11    5    4 0.00  648.95   16.38  658.56   16.38  244.04  -67.59  170.57  112.41 
1 1 1   11    5    5 0.00  929.17   16.47  934.30   16.47  483.01   93.20   24.52  -86.80 
1 1 1   11    5    6 0.00 1944.66   18.26 1917.90   18.26 1086.15  154.29    8.00  154.29 
1 1 1   11    5    7 0.00 2696.69   17.90 2679.05   17.90 1632.32 -104.94  132.10 -104.94 
1 1 1   11    5    8 0.00  800.05   17.50  821.32   17.50  415.05  111.69   60.40  -68.31 
1 1 1   11    5    9 0.00  994.91   19.51 1014.49   19.51  576.19   32.50    8.15   32.50 
1 1 1   11    5   10 0.00  296.39   20.06  325.83   20.06   19.69  -18.12  326.40  -18.12 
1 1 1   11    5   11 0.00 2545.69   19.43 2483.95   19.43 1651.01  -46.00  237.14  -46.00 
1 1 1   11    5   12 0.00 1184.23   18.35 1192.31   18.35  631.21  124.13  308.71  -55.87 
1 1 1   11    5   13 0.00  979.81   17.64 1000.78   17.64  787.22 -174.58  282.96 -174.58 
1 1 1   11    5   14 0.00 1093.89   19.07 1097.60   19.07  811.89 -104.25  156.41 -104.25 
1 1 1   11    5   15 0.00  971.52   18.73  974.70   18.73  677.38    1.32   29.84    1.32 
1 1 1   11    5   16 0.00 1158.88   18.12 1198.77   18.12 1038.13 -109.45  446.25 -109.45 
1 1 1   11    5   17 0.00 1450.91   17.82 1523.70   17.82 1045.85  -41.76   33.91  -41.76 
1 1 1   11    5   18 0.00 1355.31   17.07 1435.84   17.07 1205.79 -117.07  465.00 -117.07 
1 1 1   11    5   19 0.00 1232.60   17.42 1223.45   17.42  850.53  134.84   38.14  -45.16 
1 1 1   11    5   20 0.00  412.67   24.06  472.66   24.06  227.22 -175.86  111.26    4.14 
1 1 1   11    5   21 0.00  522.58   22.96  532.74   22.96  385.62   91.17   80.17   91.17 
1 1 1   11    5   22 0.00 1078.07   19.15 1083.13   19.15  664.95 -108.34  267.85   71.66 
1 1 1   11    5   23 1.00  615.33   22.77  588.06   22.77  263.13  -41.49  319.12  138.51 
1 1 1   11    5   24 0.00  539.72   24.27  551.76   24.27  215.98  150.10  340.73  -29.90 
1 1 1   11    5   25 0.00   98.53   44.82   34.31   44.82   30.38   39.03   65.02   39.03 
1 1 1   11    5   26 0.00  820.58   21.64  851.73   21.64  636.03   67.13   12.17   67.13 
1 1 1   11    5   27 0.00  467.10   30.87  506.32   30.87  350.25  171.81    8.77  171.81 
1 1 1   11    5   28 0.00  332.42   40.92  388.47   40.92  206.64  118.25   27.76  -61.75 
1 1 1   11    5   29 0.00  644.65   26.72  649.41   26.72  638.20 -104.19  286.11 -104.19 
1 1 1   11    5   30 0.00  529.21   30.62  573.56   30.62  450.54   58.99   35.94   58.99 
1 1 1   11    5   31 0.00  233.44   72.65  164.01   72.65   90.60  134.73  410.47  134.73 
1 1 1   11    5   32 0.00  520.66   36.48  533.81   36.48  506.75    7.95  152.62    7.95 
1 1 1   11    5   33 0.00  750.35   26.03  820.48   26.03  837.53 -106.07  273.40 -106.07 
1 1 1   11    5   34 0.00  268.84   73.82  192.46   73.82   42.34 -124.94   29.38   55.06 
1 1 1   11    5   35 0.00  124.03   64.44   84.97   64.44  179.06  -89.49  446.73  -89.49 
1 1 1   11    5   36 0.00  223.44   76.57  298.66   76.57  153.68   57.21  116.56 -122.79 
1 1 1   11    5   37 0.00  167.96   76.33  280.12   76.33  187.06 -122.43   37.13   57.57 
1 1 1   11    5   38 0.00  122.71   79.22  195.99   79.22   35.47   34.81  232.99 -145.19 
1 1 1   11    5   39 0.00   99.50   71.64  138.79   71.64    7.22   80.68   66.50   80.68 
1 1 1   11    5   40 0.00  176.24   82.96  182.45   82.96   79.61  -16.51    9.51  163.49 
1 1 1   11    5   41 0.00  106.78   69.19  127.81   69.19   26.02  -66.53  253.92  -66.53 
1 1 1   11    5   42 0.00  110.37   71.00  118.35   71.00   10.39 -104.08  169.71 -104.08 
1 1 1   11    5   43 0.00  120.36   71.74  115.47   71.74   15.97 -107.40   42.27   72.60 
1 1 1   11    5   44 0.00   92.79   58.50   92.85   58.50    2.96  150.55  120.35  -29.45 
1 1 1   11    5   45 0.00   84.50   52.98   82.75   52.98    8.92   52.11   66.72   52.11 
1 1 1   11    6    1 1.00 2525.88   16.12 2565.77   16.12 1331.16    2.45  133.33 -177.55 
1 1 1   11    6    2 0.00 1994.75   16.38 1969.40   16.38  875.95 -159.15  420.42   20.85 
1 1 1   11    6    3 0.00  834.48   15.66  812.83   15.66  293.19   86.98  277.51  -93.02 
1 1 1   11    6    4 0.00 1808.90   17.18 1799.98   17.18 1063.45   44.16  143.84   44.16 
1 1 1   11    6    5 0.00 2472.06   17.02 2436.44   17.02 1420.11  159.97  103.75  159.97 
1 1 1   11    6    6 1.00  235.95   21.98  249.85   21.98  206.63 -109.94  600.35 -109.94 
1 1 1   11    6    7 0.00 1548.59   17.99 1541.55   17.99  780.85   13.26  217.77 -166.74 
1 1 1   11    6    8 0.00  254.06   20.72  261.38   20.72   84.42  -95.89  316.21  -95.89 
1 1 1   11    6    9 0.00 1567.72   18.62 1561.57   18.62  969.00   85.60   90.67   85.60 
1 1 1   11    6   10 0.00 1466.49   22.90 1440.41   22.90  903.90 -137.35   75.77 -137.35 
1 1 1   11    6   11 0.00   37.78   31.16   83.79   31.16  250.01 -166.60  517.12 -166.60 
1 1 1   11    6   12 0.00 1482.31   17.00 1446.55   17.00  882.81 -104.06  182.39   75.94 
1 1 1   11    6   13 0.00 1067.84   17.83 1063.10   17.83  674.69 -158.53   65.03   21.47 
1 1 1   11    6   14 0.00 1351.52   20.17 1318.49   20.17 1062.94   33.42  320.90   33.42 
1 1 1   11    6   15 0.00 1006.83   20.37  993.03   20.37  818.98 -155.32  282.32 -155.32 
1 1 1   11    6   16 0.00 1559.73   17.35 1616.29   17.35 1127.09 -102.55   22.08 -102.55 
1 1 1   11    6   17 0.00  411.44   24.33  416.20   24.33  211.96  -43.03   54.62  136.97 
1 1 1   11    6   18 0.00  427.92   24.75  392.34   24.75  203.73 -155.53   82.27   24.47 
1 1 1   11    6   19 0.00  459.82   25.86  475.11   25.86  301.41  126.70   28.33  126.70 
1 1 1   11    6   20 0.00  951.85   18.77  951.89   18.77  802.80    3.95  261.66    3.95 
1 1 1   11    6   21 0.00  570.63   22.66  578.82   22.66  381.27  161.77   23.46  -18.23 
1 1 1   11    6   22 0.00 1252.99   16.80 1280.11   16.80 1008.73  -77.09  139.03  -77.09 
1 1 1   11    6   23 0.00 1839.48   15.67 1806.11   15.67 1269.16  105.54  142.12  -74.46 
1 1 1   11    6   24 0.00  604.26   24.17  616.14   24.17  561.71   -4.57  320.13   -4.57 
1 1 1   11    6   25 0.00  284.58   47.57  254.64   47.57   20.21 -150.20  367.00 -150.20 
1 1 1   11    6   26 0.00  769.37   22.14  786.41   22.14  517.01  125.66  142.05  -54.34 
1 1 1   11    6   27 0.00  954.57   20.19  987.54   20.19  856.93   77.02  207.48   77.02 
1 1 1   11    6   28 0.00  220.01   51.77  309.99   51.77   50.70  -64.27  178.66  115.73 
1 1 1   11    6   29 1.00  454.96   34.52  508.70   34.52  304.90 -172.28  121.68    7.72 
1 1 1   11    6   30 0.00  229.82   69.15  189.72   69.15   48.21   64.55  322.42   64.55 
1 1 1   11    6   31 0.00  799.05   24.81  866.71   24.81  816.03  -33.49  218.32  -33.49 
1 1 1   11    6   32 0.00  425.04   39.39  510.56   39.39  411.86  175.25   63.67  175.25 
1 1 1   11    6   33 0.00  370.41   49.05  382.38   49.05  249.16  170.16  116.44   -9.84 
1 1 1   11    6   34 0.00  676.13   29.55  735.99   29.55  711.76   98.37  123.80   98.37 
1 1 1   11    6   35 0.00  165.16   78.70  195.50   78.70    1.25  104.05  138.28  104.05 
1 1 1   11    6   36 0.00  353.56   62.63  380.95   62.63  369.06 -172.51   81.13 -172.51 
1 1 1   11    6   37 0.00  210.27   78.09  330.20   78.09  251.27  -50.91   98.38  129.09 
1 1 1   11    6   38 0.00  100.22   71.02  141.07   71.02    7.03  103.15   95.67  103.15 
1 1 1   11    6   39 0.00  172.77   79.07  129.93   79.07   37.56  -62.37  149.73  117.63 
1 1 1   11    6   40 0.00   57.42   66.42  149.46   66.42  103.66  -94.88  377.74  -94.88 
1 1 1   11    6   41 0.00  110.22   77.24  170.02   77.24   56.27   50.06   92.06 -129.94 
1 1 1   11    6   42 0.00  113.90   67.71   99.76   67.71    9.80 -151.69   98.44 -151.69 
1 1 1   11    6   43 0.00  111.59   73.26  132.11   73.26   24.84 -163.87   44.36   16.13 
1 1 1   11    6   44 0.00   87.78   51.31   68.13   51.31   13.30 -169.86   71.83 -169.86 
1 1 1   11    6   45 0.00   86.10   54.18   85.97   54.18   10.82  150.65  102.89  150.65 
1 1 1   11    7    1 0.00  405.72   15.02  435.11   15.02   90.26  158.43  129.18  -21.57 
1 1 1   11    7    2 0.00 1000.91   15.29 1012.39   15.29  566.26   62.54   81.38   62.54 
1 1 1   11    7    3 0.00 2374.47   16.14 2397.95   16.14 1218.69   66.48  184.68 -113.52 
1 1 1   11    7    4 0.00 2146.91   15.84 2067.68   15.84 1185.79   49.78   49.54   49.78 
1 1 1   11    7    5 0.00  917.67   16.39  894.20   16.39  472.90   54.07   34.42 -125.93 
1 1 1   11    7    6 0.00 1453.77   17.49 1429.58   17.49  789.73   -2.09   55.87  177.91 
1 1 1   11    7    7 0.00 1724.09   17.90 1732.84   17.90 1155.20 -169.83  324.12 -169.83 
1 1 1   11    7    8 0.00  791.87   19.40  779.15   19.40  541.29  -96.17  300.06  -96.17 
1 1 1   11    7    9 0.00  610.81   17.52  626.16   17.52  183.24   10.58  327.46 -169.42 
1 1 1   11    7   10 1.00  253.30   28.59  265.60   28.59   34.58  113.51  254.89  113.51 
1 1 1   11    7   11 0.00  155.54   40.18  174.99   40.18   23.20  -45.14   63.77  -45.14 
1 1 1   11    7   12 0.00 1187.07   18.00 1214.90   18.00  786.62 -157.25    9.77   22.75 
1 1 1   11    7   13 0.00  457.95   24.84  423.17   24.84  221.05  -22.56   39.17  -22.56 
1 1 1   11    7   14 0.00 1052.31   20.27 1041.96   20.27  595.76   57.69  218.96 -122.31 
1 1 1   11    7   15 0.00  700.06   21.57  705.11   21.57  634.36 -121.68  387.58 -121.68 
1 1 1   11    7   16 0.00  641.09   21.27  649.93   21.27  346.18 -114.07  175.72   65.93 
1 1 1   11    7   17 0.00  899.87   20.05  934.58   20.05  722.83 -179.23  207.78 -179.23 
1 1 1   11    7   18 0.00  532.33   21.01  589.21   21.01  377.99    5.35   31.95    5.35 
1 1 1   11    7   19 0.00  276.82   32.58  324.35   32.58   22.16   72.04  301.68 -107.96 
1 1 1   11    7   20 0.00  778.65   19.77  801.35   19.77  487.45   78.85  139.37 -101.15 
1 1 1   11    7   21 0.00  451.95   23.97  460.19   23.97  187.16  106.93  238.41  -73.07 
1 1 1   11    7   22 0.00 1156.12   17.22 1176.84   17.22  748.32   70.80  175.73 -109.20 
1 1 1   11    7   23 0.00  469.27   27.79  436.53   27.79  223.96 -175.26  152.25    4.74 
1 1 1   11    7   24 0.00  627.80   22.39  629.37   22.39  408.04   98.14   76.11  -81.86 
1 1 1   11    7   25 0.00  840.06   21.91  852.00   21.91  524.21   79.43  213.93 -100.57 
1 1 1   11    7   26 0.00  693.02   23.54  729.12   23.54  455.00   83.29  159.68  -96.71 
1 1 1   11    7   27 0.00  777.85   21.73  806.93   21.73  659.58  138.07  103.59  138.07 
1 1 1   11    7   28 0.00  309.98   39.29  397.86   39.29  197.52  131.56   33.83  -48.44 
1 1 1   11    7   29 0.00  716.36   24.72  776.15   24.72  612.76 -158.55   29.96 -158.55 
1 1 1   11    7   30 0.00  281.57   58.74  299.63   58.74  115.48 -113.64   68.44   66.36 
1 1 1   11    7   31 0.00  559.99   35.62  552.65   35.62  400.40  135.74  121.56  -44.26 
1 1 1   11    7   32 0.00  682.14   29.67  664.48   29.67  727.60  -90.26  306.36  -90.26 
1 1 1   11    7   33 0.00  321.12   52.67  400.98   52.67  301.23   21.59   93.03   21.59 
1 1 1   11    7   34 0.00  345.76   53.17  389.03   53.17  290.73   74.30    9.07 -105.70 
1 1 1   11    7   35 0.00  265.86   76.91  120.13   76.91    2.10    5.84  233.36 -174.16 
1 1 1   11    7   36 0.00  274.10   76.94  117.91   76.94   64.45 -171.10   52.24    8.90 
1 1 1   11    7   37 0.00  110.46   74.79  145.74   74.79    2.69  -22.10   25.55  -22.10 
1 1 1   11    7   38 0.00  194.30   82.80  127.41   82.80   40.91   95.64   20.57  -84.36 
1 1 1   11    7   39 0.00  161.70   81.21  169.51   81.21   68.78   64.10   66.85 -115.90 
1 1 1   11    7   40 0.00  152.15   79.29  155.32   79.29   56.35   33.73   50.56 -146.27 
1 1 1   11    7   41 0.00   73.62   58.30  105.82   58.30   39.03 -177.95  141.90 -177.95 
1 1 1   11    7   42 0.00  110.32   68.04  107.05   68.04    0.62  157.44   10.74  157.44 
1 1 1   11    7   43 0.00  111.67   71.43  125.73   71.43    3.93  100.09    8.60  -79.91 
1 1 1   11    7   44 0.00   99.23   61.43   98.68   61.43    4.50 -140.22   14.47   39.78 
1 1 1   11    7   45 0.00   87.19   54.57   86.54   54.57   18.01   19.20  159.31   19.20 
1 1 1   11    8    1 0.00 1532.43   14.84 1500.67   14.84  811.87  -68.37    3.56  111.63 
1 1 1   11    8    2 0.00 1072.67   14.72 1068.42   14.72  438.66  -30.60  258.93  149.40 
1 1 1   11    8    3 1.00 1665.10   15.18 1660.04   15.18 1101.21   56.31  361.09   56.31 
1 1 1   11    8    4 0.00 2687.72   12.74 2674.03   12.74 1603.04   -7.24  173.68   -7.24 
1 1 1   11    8    5 0.00 2591.49   14.71 2534.50   14.71 1291.23  -75.75  341.02  104.25 
1 1 1   11    8    6 0.00 2043.79   16.32 2040.30   16.32 1273.49   86.88  210.73   86.88 
1 1 1   11    8    7 0.00  931.44   17.25  945.16   17.25  490.07   72.01   59.05 -107.99 
1 1 1   11    8    8 0.00  270.13   26.27  231.09   26.27   23.83   -9.53  192.61   -9.53 
1 1 1   11    8    9 0.00 1789.92   25.61 1820.05   25.61 1048.54  125.34   40.29  -54.66 
1 1 1   11    8   10 0.00 1808.29   21.46 1814.59   21.46 1051.38  -80.08   67.88   99.92 
1 1 1   11    8   11 0.00  681.72   20.24  696.72   20.24  377.57  120.48  101.16  -59.52 
1 1 1   11    8   12 0.00  648.15   24.51  676.48   24.51  488.85 -132.72  188.74 -132.72 
1 1 1   11    8   13 0.00  825.91   19.45  837.45   19.45  423.85  119.42  241.75  -60.58 
1 1 1   11    8   14 0.00  104.18   41.69   33.53   41.69   77.36  -93.54  165.43  -93.54 
1 1 1   11    8   15 0.00  463.07   23.25  467.18   23.25  138.69  -31.55  319.12  148.45 
1 1 1   11    8   16 0.00  840.90   20.44  885.01   20.44  595.21  104.67   40.95  104.67 
1 1 1   11    8   17 0.00  780.18   21.25  734.06   21.25  491.45   93.27   30.49  -86.73 
1 1 1   11    8   18 0.00  804.96   21.29  820.59   21.29  516.84   73.85   79.79 -106.15 
1 1 1   11    8   19 0.00  845.41   20.42  863.97   20.42  585.92  -10.24   17.94  169.76 
1 1 1   11    8   20 0.00 1117.06   19.17 1180.43   19.17  654.41   53.83  345.06 -126.17 
1 1 1   11    8   21 0.00  964.20   17.66  935.62   17.66  821.84   67.62  282.76   67.62 
1 1 1   11    8   22 0.00  435.58   26.53  437.68   26.53  143.68 -160.53  289.87   19.47 
1 1 1   11    8   23 0.00  700.98   20.50  726.51   20.50  544.04   74.09   87.40   74.09 
1 1 1   11    8   24 0.00  511.16   24.41  560.72   24.41  334.87   73.74   73.30 -106.26 
1 1 1   11    8   25 0.00  412.73   29.40  508.49   29.40  196.18  -13.20  253.36  166.80 
1 1 1   11    8   26 0.00  500.79   28.02  527.75   28.02  320.46   73.05   99.77 -106.95 
1 1 1   11    8   27 0.00  733.86   23.29  784.22   23.29  630.76  -50.60  104.19  -50.60 
1 1 1   11    8   28 0.00  652.73   25.59  689.48   25.59  593.74  150.36  162.92  150.36 
1 1 1   11    8   29 1.00  396.17   39.45  376.80   39.45  162.47  -96.72  242.31   83.28 
1 1 1   11    8   30 0.00  864.19   23.69  897.89   23.69  875.89  115.42  295.58  115.42 
1 1 1   11    8   31 0.00  674.92   30.58  683.43   30.58  494.64  -56.42  161.02  123.58 
1 1 1   11    8   32 0.00  609.26   30.16  623.68   30.16  554.04  -33.41   50.28  -33.41 
1 1 1   11    8   33 0.00  713.85   28.57  696.28   28.57  607.14  129.53   53.87  -50.47 
1 1 1   11    8   34 0.00  256.74   71.50  224.29   71.50   77.10   50.61   87.70 -129.39 
1 1 1   11    8   35 0.00  154.40   75.61  153.64   75.61   48.30   91.08  217.26   91.08 
1 1 1   11    8   36 0.00  199.90   73.21   79.76   73.21  135.93   14.44  470.29   14.44 
1 1 1   11    8   37 0.00   81.41   58.75   99.32   58.75   24.84 -152.61   77.17 -152.61 
1 1 1   11    8   38 0.00  300.67   90.96  211.68   90.96  310.82  -66.69   50.61  -66.69 
1 1 1   11    8   39 1.00  201.94   84.02  163.62   84.02   63.96  -79.64  283.42  100.36 
1 1 1   11    8   40 0.00  142.05   80.18  208.99   80.18  132.34    2.95   52.73 -177.05 
1 1 1   11    8   41 0.00  105.43   60.38   84.17   60.38   48.17  148.08  190.94  148.08 
1 1 1   11    8   42 0.00  100.76   66.63  110.71   66.63   17.85  112.74  139.51  112.74 
1 1 1   11    8   43 0.00  113.89   72.98  129.04   72.98   69.46  155.55   88.22  -24.45 
1 1 1   11    8   44 0.00   90.74   56.68   87.92   56.68    0.97  -51.26   50.41  -51.26 
1 1 1   11    8   45 0.00   86.36   54.01   85.14   54.01   10.76   63.22   99.37   63.22 
1 1 1   11    9    1 0.00 1561.85   14.65 1553.33   14.65  997.84   87.43  295.56   87.43 
1 1 1   11    9    2 0.00  913.17   14.59  901.39   14.59  542.74  104.45  141.83  104.45 
1 1 1   11    9    3 0.00 1401.05   14.91 1425.07   14.91  800.23 -118.90   44.65 -118.90 
1 1 1   11    9    4 0.00 3287.75    7.48 3289.31    7.48 1970.21 -101.94  220.10 -101.94 
1 1 1   11    9    5 0.00 1287.06   16.30 1279.40   16.30  661.04 -122.74  108.77   57.26 
1 1 1   11    9    6 0.00 2024.78   15.49 2031.32   15.49 1193.70  -37.83   69.53  -37.83 
1 1 1   11    9    7 0.00  592.95   17.80  599.56   17.80  239.46  -69.46  160.55  110.54 
1 1 1   11    9    8 0.00 2448.16   15.56 2498.91   15.56 1515.25   68.68  126.07   68.68 
1 1 1   11    9    9 0.00  606.99   23.19  595.06   23.19  277.30   -2.80   99.57  177.20 
1 1 1   11    9   10 0.00  229.24   33.22  183.56   33.22   33.96  -86.16  132.58  -86.16 
1 1 1   11    9   11 0.00 1710.87   20.49 1708.13   20.49 1220.79  143.51  196.76  143.51 
1 1 1   11    9   12 0.00  924.19   23.26  928.08   23.26  690.04   90.46  193.37   90.46 
1 1 1   11    9   13 0.00  720.57   22.66  695.32   22.66  470.04 -160.51   28.16 -160.51 
1 1 1   11    9   14 0.00 1081.36   19.03 1067.86   19.03  787.36    9.80  127.18    9.80 
1 1 1   11    9   15 1.00  962.56   21.66  927.72   21.66  531.68   23.62  226.31 -156.38 
1 1 1   11    9   16 0.00  427.95   23.96  417.69   23.96  218.30  136.21   49.77  -43.79 
1 1 1   11    9   17 0.00  501.20   23.65  507.47   23.65  268.34 -159.93  102.81   20.07 
1 1 1   11    9   18 0.00  665.87   20.66  677.19   20.66  444.55  -60.36    9.04  119.64 
1 1 1   11    9   19 1.00  613.40   21.51  601.98   21.51  292.00  -55.95  242.99  124.05 
1 1 1   11    9   20 0.00  802.71   19.19  799.25   19.19  600.63  131.28   81.48  131.28 
1 1 1   11    9   21 0.00  976.66   18.09  994.23   18.09  690.70 -102.08   43.50   77.92 
1 1 1   11    9   22 0.00 1372.66   17.76 1384.93   17.76 1293.65  -16.44  617.78  -16.44 
1 1 1   11    9   23 0.00  458.26   24.60  502.14   24.60  213.81  -20.67  222.69  159.33 
1 1 1   11    9   24 0.00  305.42   34.38  317.77   34.38   18.13   13.77  358.70 -166.23 
1 1 1   11    9   25 0.00 1780.50   17.09 1707.65   17.09 1412.92   23.65  174.69   23.65 
1 1 1   11    9   26 0.00  319.81   37.54  367.83   37.54  161.71 -172.89   48.66 -172.89 
1 1 1   11    9   27 0.00  920.81   20.11 1005.00   20.11  771.64  135.89   47.33  135.89 
1 1 1   11    9   28 0.00  590.98   28.76  567.53   28.76  493.11  129.75  122.63  129.75 
1 1 1   11    9   29 0.00  642.95   25.46  784.57   25.46  633.88   38.44  136.80   38.44 
1 1 1   11    9   30 0.00  257.20   45.47  486.55   45.47  213.22 -112.37  101.66   67.63 
1 1 1   11    9   31 0.00  595.75   32.31  536.03   32.31  492.19 -107.33   57.12 -107.33 
1 1 1   11    9   32 0.00  437.71   37.70  517.75   37.70  293.88  139.59  219.34  -40.41 
1 1 1   11    9   33 0.00  586.88   32.87  609.58   32.87  666.50  -72.69  302.24  -72.69 
1 1 1   11    9   34 0.00  201.74   70.80  259.89   70.80   56.81   27.94  149.91 -152.06 
1 1 1   11    9   35 0.00  157.00   72.07  112.39   72.07   24.42  -84.62   86.21  -84.62 
1 1 1   11    9   36 1.00   97.88   66.42  127.29   66.42   27.41  109.90  108.54  109.90 
1 1 1   11    9   37 0.00  274.59   61.19  395.49   61.19  520.68  156.14  360.11  156.14 
1 1 1   11    9   38 1.00  203.39   80.87  231.00   80.87  188.30 -128.72   67.11 -128.72 
1 1 1   11    9   39 0.00  103.63   66.90  107.54   66.90   50.36   50.17  196.60   50.17 
1 1 1   11    9   40 0.00  174.39   78.45  122.56   78.45   55.45 -162.74  130.75   17.26 
1 1 1   11    9   41 0.00  112.76   72.94  145.09   72.94   26.72  -69.58  106.24  110.42 
1 1 1   11    9   42 0.00  122.45   86.32  177.02   86.32   93.90  104.06  117.38  -75.94 
1 1 1   11    9   43 0.00  116.85   74.37  132.09   74.37   79.90  172.35   99.74   -7.65 
1 1 1   11    9   44 0.00   90.52   59.26   98.62   59.26    6.57 -178.67   96.70    1.33 
1 1 1   11   10    1 0.00 1360.25   14.58 1357.66   14.58  720.82  -25.86   33.50  154.14 
1 1 1   11   10    2 0.00 2395.82   13.13 2415.43   13.13 1455.25 -108.47  243.16 -108.47 
1 1 1   11   10    3 0.00 1171.87   14.73 1157.05   14.73  591.58  -38.41   83.78  141.59 
1 1 1   11   10    4 1.00 1107.32   15.10 1123.95   15.10  624.37  138.19   34.82  138.19 
1 1 1   11   10    5 0.00 1634.34   15.40 1644.92   15.40  946.00 -141.66   40.83 -141.66 
1 1 1   11   10    6 0.00  344.39   20.54  365.33   20.54   56.30  -49.13    7.07  130.87 
1 1 1   11   10    7 1.00  185.93   30.25  182.39   30.25   33.27  158.73  103.16  158.73 
1 1 1   11   10    8 0.00 2150.21   18.21 2154.31   18.21 1036.14    3.27  448.57 -176.73 
1 1 1   11   10    9 0.00  646.42   19.94  659.05   19.94  372.83   67.73   30.36 -112.27 
1 1 1   11   10   10 0.00  533.46   23.69  514.95   23.69  170.70 -173.26  281.71    6.74 
1 1 1   11   10   11 1.00  588.14   23.43  579.02   23.43  407.16   51.83  180.29   51.83 
1 1 1   11   10   12 0.00  527.91   27.05  543.50   27.05  331.40  110.99  188.69  110.99 
1 1 1   11   10   13 0.00  484.33   25.12  500.24   25.12  343.57   27.93  174.37   27.93 
1 1 1   11   10   14 0.00  525.73   27.06  497.23   27.06  266.48   57.51  105.69 -122.49 
1 1 1   11   10   15 0.00  316.29   33.70  394.35   33.70   32.17  -96.55  354.91   83.45 
1 1 1   11   10   16 0.00 1090.88   19.49 1102.67   19.49  730.09 -161.68   17.98   18.32 
1 1 1   11   10   17 0.00  207.31   34.91  214.63   34.91   34.38  -57.99  216.37  -57.99 
1 1 1   11   10   18 0.00 1001.94   18.45 1007.86   18.45  769.05   72.28  155.86   72.28 
1 1 1   11   10   19 0.00  349.34   26.19  350.44   26.19  152.20  -43.88   63.28  136.12 
1 1 1   11   10   20 0.00 1299.60   18.62 1312.59   18.62 1178.90 -166.81  492.75 -166.81 
1 1 1   11   10   21 0.00 1179.43   18.54 1185.64   18.54  877.47    7.97   97.22    7.97 
1 1 1   11   10   22 0.00  487.96   23.66  475.65   23.66  343.89  -41.82   95.27  -41.82 
1 1 1   11   10   23 0.00  425.07   28.52  429.34   28.52  275.21 -177.24   40.62 -177.24 
1 1 1   11   10   24 0.00  525.59   23.18  573.30   23.18  292.30  -19.55  186.07  160.45 
1 1 1   11   10   25 0.00  429.75   30.58  390.65   30.58  176.33    5.58  206.32 -174.42 
1 1 1   11   10   26 0.00  286.16   44.69  265.02   44.69   47.88 -160.92  221.90   19.08 
1 1 1   11   10   27 0.00  856.82   22.44  866.89   22.44  783.73   69.23  249.58   69.23 
1 1 1   11   10   28 0.00  776.50   24.47  771.29   24.47  513.00  -48.73  194.16  131.27 
1 1 1   11   10   29 0.00  479.50   32.36  583.14   32.36  445.40 -131.02   90.35 -131.02 
1 1 1   11   10   30 0.00  631.54   28.49  631.22   28.49  577.20  -80.05  138.32  -80.05 
1 1 1   11   10   31 1.00  237.97   63.43  254.00   63.43   52.33  -65.44   37.57  114.56 
1 1 1   11   10   32 0.00  311.98   58.49  247.95   58.49  120.49   -8.45  138.98  171.55 
1 1 1   11   10   33 0.00  261.29   59.91  331.91   59.91   83.80   32.74  301.03 -147.26 
1 1 1   11   10   34 0.00  186.79   71.57  107.17   71.57   30.89   25.44  142.44   25.44 
1 1 1   11   10   35 0.00  432.01   47.27  384.36   47.27  474.82 -153.96  305.89 -153.96 
1 1 1   11   10   36 0.00  305.03   59.28  341.19   59.28  432.39  110.20  258.14  110.20 
1 1 1   11   10   37 0.00  122.81   71.95  141.60   71.95   49.66   63.00  328.34   63.00 
1 1 1   11   10   38 0.00   97.57   71.18  150.06   71.18   34.51  115.49  237.36  115.49 
1 1 1   11   10   39 0.00  193.45   81.39  150.58   81.39   94.20  111.73   78.46  -68.27 
1 1 1   11   10   40 0.00  165.29   82.28  161.16   82.28  103.10  -13.98  138.17  166.02 
1 1 1   11   10   41 1.00  105.66   60.78   87.24   60.78   22.41 -134.65  100.89 -134.65 
1 1 1   11   10   42 0.00  130.40   84.50  159.36   84.50  105.20  127.67   58.21  -52.33 
1 1 1   11   10   43 0.00   96.82   66.15  115.78   66.15   22.99  -37.20   83.72  142.80 
1 1 1   11   10   44 0.00   86.07   53.35   79.98   53.35   13.75 -106.66   97.90 -106.66 
1 1 1   12    1    1 0.00 1089.97   21.54 1088.23   21.54  413.56 -171.12  388.15    8.88 
1 1 1   12    1    2 0.00 2122.39   28.86 2158.23   28.86 1233.32 -178.96   44.43 -178.96 
1 1 1   12    1    3 0.00 2229.30   27.92 2259.20   27.92 1439.38  174.49  350.61  174.49 
1 1 1   12    1    4 0.00 2694.34   31.05 2720.63   31.05 1540.89 -118.55   23.98 -118.55 
1 1 1   12    1    5 0.00 1865.99   23.53 1879.31   23.53  902.65 -145.08  299.41   34.92 
1 1 1   12    1    6 0.00  394.33   17.26  413.46   17.26    4.68 -172.98  356.48    7.02 
1 1 1   12    1    7 0.00 1593.94   19.33 1609.38   19.33 1031.50   73.15  223.28   73.15 
1 1 1   12    1    8 0.00 1602.80   19.89 1629.20   19.89  927.47 -102.42   18.17   77.58 
1 1 1   12    1    9 0.00 1390.04   19.38 1380.57   19.38  964.02   61.33  333.43   61.33 
1 1 1   12    1   10 0.00  806.38   18.55  823.83   18.55  514.14  -94.25  110.02  -94.25 
1 1 1   12    1   11 0.00  991.13   17.82 1005.22   17.82  722.17  -14.52  292.91  -14.52 
1 1 1   12    1   12 0.00 1266.54   17.91 1264.08   17.91  948.40 -167.22  258.04 -167.22 
1 1 1   12    1   13 0.00 1105.20   17.60 1099.03   17.60  865.46  -93.36  304.40  -93.36 
1 1 1   12    1   14 0.00  958.55   18.03  955.79   18.03  641.38  124.10   33.73  124.10 
1 1 1   12    1   15 0.00  774.05   19.64  744.01   19.64  458.94  104.47   79.91  -75.53 
1 1 1   12    1   16 0.00  390.25   22.56  404.06   22.56  119.34 -135.32  242.18   44.68 
1 1 1   12    1   17 0.00  737.23   20.38  756.77   20.38  649.29  -67.17  358.50  -67.17 
1 1 1   12    1   18 0.00 1246.69   20.49 1208.69   20.49  953.63  110.99  238.50  110.99 
1 1 1   12    1   19 0.00  839.67   19.35  877.71   19.35  629.86 -136.10   98.15 -136.10 
1 1 1   12    1   20 0.00  951.05   18.26  932.10   18.26  627.13   78.16   51.10 -101.84 
1 1 1   12    1   21 0.00 1340.81   16.88 1324.38   16.88  853.34 -142.81  195.55   37.19 
1 1 1   12    1   22 1.00 1227.63   17.42 1202.71   17.42  922.33 -170.90   92.69 -170.90 
1 1 1   12    1   23 0.00  276.36   34.72  408.44   34.72  154.19   18.56    5.96   18.56 
1 1 1   12    1   24 0.00 1097.10   18.59 1086.18   18.59  608.71  -99.95  354.85   80.05 
1 1 1   12    1   25 0.00  707.39   21.64  722.44   21.64  426.52  144.43  169.65  -35.57 
1 1 1   12    1   26 0.00 1818.22   15.99 1836.17   15.99 1471.32  -27.10  190.93  -27.10 
1 1 1   12    1   27 0.00  586.72   26.91  541.07   26.91  299.84  -84.65  223.26   95.35 
1 1 1   12    1   28 0.00  578.58   28.57  556.65   28.57  261.11  158.81  326.49  -21.19 
1 1 1   12    1   29 0.00  171.35   56.13  353.95   56.13   59.33   72.22  155.84 -107.78 
1 1 1   12    1   30 0.00  267.16   67.70  234.39   67.70   12.22   98.30  263.44  -81.70 
1 1 1   12    1   31 0.00  754.15   27.63  729.56   27.63  656.79 -127.50  109.59 -127.50 
1 1 1   12    1   32 0.00  426.91   60.43  305.53   60.43  250.73   43.46   23.63 -136.54 
1 1 1   12    1   33 0.00  374.11   56.32  408.84   56.32  330.81 -131.75   82.12 -131.75 
1 1 1   12    1   34 0.00  102.87   75.97  190.26   75.97   53.97 -130.77  207.15 -130.77 
1 1 1   12    1   35 0.00  289.96   79.16  221.27   79.16  121.67   70.27   51.22 -109.73 
1 1 1   12    1   36 0.00  295.73   83.95  251.59   83.95  145.61  119.29  163.22  -60.71 
1 1 1   12    1   37 0.00  173.87   81.04  289.47   81.04  202.03  173.49   29.27  173.49 
1 1 1   12    1   38 0.00  242.48   81.20  119.35   81.20  119.79  126.85   19.47  -53.15 
1 1 1   12    1   39 0.00  166.11   79.22  132.27   79.22   24.62 -123.64   49.35   56.36 
1 1 1   12    1   40 0.00  117.10   75.98  156.48   75.98    3.41  -59.62  187.59  120.38 
1 1 1   12    1   41 0.00  101.17   60.72   91.63   60.72   10.52 -125.19   47.11 -125.19 
1 1 1   12    1   42 0.00  107.38   68.70  126.77   68.70    2.04   86.28   29.82  -93.72 
1 1 1   12    1   43 0.00   99.84   61.98   94.47   61.98    4.38  -72.17   39.39  -72.17 
1 1 1   12    1   44 0.00   96.37   60.79   97.36   60.79   12.61   24.67  109.30 -155.33 
1 1 1   12    1   45 0.00   85.61   53.89   84.57   53.89    4.64   94.17   43.12   94.17 
1 1 1   12    2    1 0.00  988.54   22.85 1017.69   22.85  606.21  163.25  136.34  163.25 
1 1 1   12    2    2 0.00 1421.69   23.24 1421.99   23.24  671.79   97.85  232.90  -82.15 
1 1 1   12    2    3 0.00 1654.97   23.47 1650.21   23.47  922.44 -155.20   11.68 -155.20 
1 1 1   12    2    4 0.00 1156.04   19.88 1166.24   19.88  425.94  162.99  423.75  -17.01 
1 1 1   12    2    5 0.00 3267.14   21.46 3299.28   21.46 1750.60   65.23  195.65 -114.77 
1 1 1   12    2    6 0.00 2574.30   23.49 2558.91   23.49 1325.15   67.71  243.77 -112.29 
1 1 1   12    2    7 0.00  891.75   16.69  884.29   16.69  377.08   38.08  231.54 -141.92 
1 1 1   12    2    8 0.00 1769.42   20.32 1782.33   20.32 1039.23 -121.47   18.75 -121.47 
1 1 1   12    2    9 0.00 1188.43   17.17 1179.92   17.17  726.32  106.37   99.31  106.37 
1 1 1   12    2   10 0.00 1205.62   21.83 1206.65   21.83  511.75   47.63  395.69 -132.37 
1 1 1   12    2   11 0.00 1443.35   17.50 1422.72   17.50  741.81  123.94  225.37  -56.06 
1 1 1   12    2   12 0.00 2117.78   17.86 2104.82   17.86 1581.77 -142.54  381.68 -142.54 
1 1 1   12    2   13 0.00  128.86   39.30  132.47   39.30  129.34  -81.73  303.80  -81.73 
1 1 1   12    2   14 0.00  690.11   19.32  704.04   19.32  470.73   80.23   71.52   80.23 
1 1 1   12    2   15 0.00  542.51   19.89  567.07   19.89  325.29  -15.84   47.26  164.16 
1 1 1   12    2   16 0.00  828.07   18.97  853.49   18.97  552.69 -166.67   23.17   13.33 
1 1 1   12    2   17 0.00 1706.52   17.52 1702.16   17.52 1347.36   95.93  379.10   95.93 
1 1 1   12    2   18 0.00 1171.91   22.12 1120.23   22.12  825.83 -173.36   90.09 -173.36 
1 1 1   12    2   19 0.00  435.79   26.71  386.85   26.71  228.86 -124.83    9.24   55.17 
1 1 1   12    2   20 0.00 1005.35   18.03 1004.70   18.03  822.80  137.99  251.40  137.99 
1 1 1   12    2   21 0.00  651.23   21.03  698.00   21.03  470.53  -75.18   18.70  -75.18 
1 1 1   12    2   22 0.00  687.41   20.52  699.22   20.52  509.84   82.98   56.13   82.98 
1 1 1   12    2   23 0.00  833.93   19.17  853.59   19.17  628.08  -62.49   80.05  -62.49 
1 1 1   12    2   24 0.00  553.72   23.78  579.11   23.78  418.83   72.47   81.55   72.47 
1 1 1   12    2   25 0.00  574.47   24.21  616.65   24.21  376.77 -113.88   82.09   66.12 
1 1 1   12    2   26 0.00  535.60   26.61  523.43   26.61  354.32 -171.39   28.15    8.61 
1 1 1   12    2   27 0.00 1340.55   17.49 1354.47   17.49 1112.90 -168.35  156.50 -168.35 
1 1 1   12    2   28 0.00  251.82   55.33  287.77   55.33   45.62  164.23  205.23  -15.77 
1 1 1   12    2   29 0.00  180.93   67.17  213.58   67.17   23.54 -115.99  175.52 -115.99 
1 1 1   12    2   30 0.00  891.69   23.18  886.67   23.18  735.71  -78.03   30.40  -78.03 
1 1 1   12    2   31 0.00  565.61   36.01  453.31   36.01  383.50  -88.62   26.81   91.38 
1 1 1   12    2   32 0.00  656.31   29.63  683.56   29.63  599.37   57.09   77.23   57.09 
1 1 1   12    2   33 0.00   91.70   73.58  162.06   73.58   84.90   36.50  247.81   36.50 
1 1 1   12    2   34 0.00  811.05   31.37  825.11   31.37  872.40   79.14  268.28   79.14 
1 1 1   12    2   35 0.00  107.69   68.95  115.99   68.95   55.75 -177.61  149.34 -177.61 
1 1 1   12    2   36 0.00  113.35   69.82  138.72   69.82   10.47   86.22   40.08   86.22 
1 1 1   12    2   37 0.00  184.13   77.09  114.02   77.09   12.73   50.84  147.77 -129.16 
1 1 1   12    2   38 0.00  181.65   85.10  216.64   85.10  157.79  146.52   58.50  -33.48 
1 1 1   12    2   39 0.00  181.12   85.84  216.09   85.84   71.25 -170.89  315.18    9.11 
1 1 1   12    2   40 0.00  153.33   75.84  123.90   75.84   15.65  -17.53  113.95  162.47 
1 1 1   12    2   41 0.00   91.83   57.97   90.47   57.97   19.50   37.86   72.67   37.86 
1 1 1   12    2   42 0.00  121.14   73.94  121.68   73.94    2.75 -153.07   16.99   26.93 
1 1 1   12    2   43 1.00   92.75   56.56   80.32   56.56   27.82  169.13  116.37  169.13 
1 1 1   12    2   44 0.00   93.82   58.77   92.30   58.77    5.15  -57.80   78.31  122.20 
1 1 1   12    2   45 0.00   83.68   51.87   78.51   51.87    8.28  124.14   49.58  124.14 
1 1 1   12    3    1 0.00 1127.44   21.93 1128.11   21.93  470.09   43.09  290.12 -136.91 
1 1 1   12    3    2 0.00  504.73   20.12  491.56   20.12  184.04  144.01   25.14  -35.99 
1 1 1   12    3    3 1.00 1803.35   21.78 1812.72   21.78  813.86  123.79  373.37  -56.21 
1 1 1   12    3    4 0.00 2305.14   23.65 2305.98   23.65 1296.67   60.20   30.54   60.20 
1 1 1   12    3    5 0.00 1498.25   19.60 1511.75   19.60  862.63   38.48   68.91   38.48 
1 1 1   12    3    6 0.00 2094.07   20.35 2131.73   20.35 1257.72  -43.12  153.09  -43.12 
1 1 1   12    3    7 0.00 1823.95   18.86 1839.33   18.86 1113.71 -163.12  123.20 -163.12 
1 1 1   12    3    8 0.00 1279.78   17.92 1270.36   17.92  734.91  -56.04   15.85  -56.04 
1 1 1   12    3    9 0.00 1880.99   18.48 1854.80   18.48 1124.78   36.56   65.38   36.56 
1 1 1   12    3   10 0.00 1750.89   27.46 1729.07   27.46 1180.83  -31.01  304.82  -31.01 
1 1 1   12    3   11 0.00 1215.47   18.64 1204.58   18.64  663.13 -119.78  106.84   60.22 
1 1 1   12    3   12 0.00  443.89   20.55  383.73   20.55  172.01   36.27   64.41 -143.73 
1 1 1   12    3   13 0.00  615.29   18.82  608.22   18.82  396.37   94.12   62.55   94.12 
1 1 1   12    3   14 0.00  231.17   29.48  236.32   29.48   95.55  106.32  385.40  106.32 
1 1 1   12    3   15 0.00  885.15   18.23  898.89   18.23  682.68  124.21  183.89  124.21 
1 1 1   12    3   16 0.00 1138.11   19.27 1161.90   19.27  782.37   66.38    9.31 -113.62 
1 1 1   12    3   17 0.00 1075.84   19.67 1045.73   19.67  778.97  155.42  134.55  155.42 
1 1 1   12    3   18 0.00  947.21   19.97  953.14   19.97  705.53  -29.14  126.22  -29.14 
1 1 1   12    3   19 0.00  535.48   25.30  518.97   25.30  382.92  179.13  116.63  179.13 
1 1 1   12    3   20 0.00  576.80   22.14  565.92   22.14  211.31  111.65  352.64  -68.35 
1 1 1   12    3   21 0.00  915.18   19.30  946.87   19.30  708.13 -133.72  102.38 -133.72 
1 1 1   12    3   22 0.00 1213.27   17.29 1211.10   17.29  900.21  -96.76   37.69  -96.76 
1 1 1   12    3   23 0.00 1433.03   16.18 1475.59   16.18 1128.72  -93.18  170.99  -93.18 
1 1 1   12    3   24 0.00  501.23   26.31  496.53   26.31  396.12  161.77  203.38  161.77 
1 1 1   12    3   25 0.00 1126.72   17.85 1154.02   17.85  912.29 -146.12  142.84 -146.12 
1 1 1   12    3   26 0.00  205.10   60.24  177.43   60.24   22.36  -56.91  148.56  -56.91 
1 1 1   12    3   27 0.00  678.93   24.85  695.95   24.85  628.94  -38.33  253.99  -38.33 
1 1 1   12    3   28 0.00  235.92   57.73  284.40   57.73   52.11   87.75  127.63  -92.25 
1 1 1   12    3   29 0.00  482.98   34.30  427.50   34.30  379.62  -46.47  189.17  -46.47 
1 1 1   12    3   30 0.00  895.34   22.34  907.83   22.34  706.04 -131.80   60.85   48.20 
1 1 1   12    3   31 0.00  642.98   27.75  674.98   27.75  557.72  125.57   43.27  125.57 
1 1 1   12    3   32 0.00  290.26   67.36  138.76   67.36    9.20  103.96  216.75  -76.04 
1 1 1   12    3   33 0.00  270.10   53.19  486.11   53.19  188.62  -22.76  241.00  157.24 
1 1 1   12    3   34 0.00  155.20   78.84  155.63   78.84   38.73  145.18  163.21  145.18 
1 1 1   12    3   35 0.00  165.96   83.75  231.51   83.75   26.44  -38.78   88.12  141.22 
1 1 1   12    3   36 1.00  144.00   75.97  142.54   75.97   18.95  103.58  113.68  103.58 
1 1 1   12    3   37 0.00  168.46   80.45  243.01   80.45  114.65  168.85  163.85  -11.15 
1 1 1   12    3   38 0.00  106.17   70.56  132.76   70.56   34.66  -62.84  218.71  -62.84 
1 1 1   12    3   39 0.00  179.92   81.54  135.32   81.54   44.80  -17.66   53.32  162.34 
1 1 1   12    3   40 0.00  107.86   69.96  130.05   69.96   28.29  161.73  185.68  161.73 
1 1 1   12    3   41 0.00  113.84   74.51  154.77   74.51   32.85   36.92   62.67 -143.08 
1 1 1   12    3   42 0.00   99.59   60.97   87.70   60.97   16.92  162.38   69.35  162.38 
1 1 1   12    3   43 0.00  100.30   61.09   90.95   61.09   16.33  -28.79  111.88  -28.79 
1 1 1   12    3   44 0.00   96.89   61.72  100.79   61.72    0.66  -79.05  220.48  100.95 
1 1 1   12    3   45 0.00   84.96   54.05   86.03   54.05   39.38   20.61  238.23   20.61 
1 1 1   12    4    1 0.00 1809.89   24.25 1816.00   24.25 1176.41   72.18  367.31   72.18 
1 1 1   12    4    2 0.00 3773.79   19.48 3800.03   19.48 2286.96   85.58  375.25   85.58 
1 1 1   12    4    3 0.00  745.52   17.29  717.19   17.29  244.08  156.55  268.53  -23.45 
1 1 1   12    4    4 0.00  981.01   17.78  977.35   17.78  673.81  128.91  345.98  128.91 
1 1 1   12    4    5 0.00 1511.53   18.43 1506.33   18.43  942.09  -34.10  234.53  -34.10 
1 1 1   12    4    6 0.00  735.18   16.42  743.96   16.42  278.07 -179.80  236.41    0.20 
1 1 1   12    4    7 0.00 1757.96   17.68 1747.32   17.68 1166.44 -101.06  331.20 -101.06 
1 1 1   12    4    8 0.00 3168.48   11.42 3225.36   11.42 2037.66   13.66  342.81   13.66 
1 1 1   12    4    9 0.00 1253.86   17.15 1242.59   17.15  729.75  -95.90   12.50  -95.90 
1 1 1   12    4   10 0.00 1097.26   22.27 1061.65   22.27  650.42 -125.24   47.53 -125.24 
1 1 1   12    4   11 0.00  963.00   17.89  981.55   17.89  607.07  171.41   83.42  171.41 
1 1 1   12    4   12 0.00  871.43   17.65  859.96   17.65  445.82  111.42  216.49  -68.58 
1 1 1   12    4   13 0.00  491.82   20.23  471.77   20.23  212.50 -128.33  131.27   51.67 
1 1 1   12    4   14 0.00  790.21   19.35  778.52   19.35  495.96  168.43   17.28  -11.57 
1 1 1   12    4   15 0.00 1448.26   19.24 1467.03   19.24  946.30  -20.06   95.92  159.94 
1 1 1   12    4   16 0.00  544.13   21.76  564.94   21.76  253.44  -32.74  215.25  147.26 
1 1 1   12    4   17 0.00  559.17   23.78  539.39   23.78  200.78  -74.10  308.64  105.90 
1 1 1   12    4   18 0.00   87.94   51.74  221.48   51.74  101.56  176.31  306.45  176.31 
1 1 1   12    4   19 0.00  537.20   23.14  575.45   23.14  444.28 -174.11  212.42 -174.11 
1 1 1   12    4   20 0.00  514.38   24.37  511.25   24.37  273.24   25.53  126.81 -154.47 
1 1 1   12    4   21 0.00 1173.18   17.43 1193.77   17.43  856.37 -106.90   14.73 -106.90 
1 1 1   12    4   22 0.00  488.46   26.95  462.59   26.95  263.31  157.96  103.44  -22.04 
1 1 1   12    4   23 0.00  305.76   35.75  338.16   35.75  123.49  151.17   73.23  -28.83 
1 1 1   12    4   24 0.00  543.10   25.39  563.98   25.39  374.58   82.78    1.29  -97.22 
1 1 1   12    4   25 0.00 1032.21   19.33 1057.93   19.33  877.57  -52.43  217.01  -52.43 
1 1 1   12    4   26 0.00  591.08   24.56  650.80   24.56  515.75   64.57  146.21   64.57 
1 1 1   12    4   27 0.00  349.11   40.10  381.59   40.10  191.13 -163.24   85.68   16.76 
1 1 1   12    4   28 0.00  344.02   39.12  435.90   39.12  211.29  150.97  103.91  -29.03 
1 1 1   12    4   29 0.00  315.88   46.00  370.68   46.00  187.44  144.31   27.21  144.31 
1 1 1   12    4   30 0.00  400.96   35.81  497.77   35.81  283.59  -59.47  110.85  120.53 
1 1 1   12    4   31 0.00  828.77   23.20  871.47   23.20  786.70   82.09  147.87   82.09 
1 1 1   12    4   32 0.00  912.81   22.87  947.34   22.87  874.26  -43.31  133.58  -43.31 
1 1 1   12    4   33 0.00  589.73   30.88  614.87   30.88  667.14  -82.35  314.94  -82.35 
1 1 1   12    4   34 0.00  361.99   50.50  452.77   50.50  394.31  -44.58  197.90  -44.58 
1 1 1   12    4   35 0.00  256.25   78.37  230.56   78.37  100.22   74.28   78.12 -105.72 
1 1 1   12    4   36 0.00  110.04   63.19   87.48   63.19   53.94 -133.98  142.76 -133.98 
1 1 1   12    4   37 0.00  139.81   70.31  104.14   70.31   25.25  -90.95  135.50  -90.95 
1 1 1   12    4   38 0.00   93.41   60.34   94.97   60.34   86.76 -154.13  268.47 -154.13 
1 1 1   12    4   39 0.00  122.12   74.95  141.99   74.95   30.42   69.53  270.48   69.53 
1 1 1   12    4   40 0.00  101.87   67.39  118.72   67.39   54.68  163.10  235.78  163.10 
1 1 1   12    4   41 0.00  126.59   71.17  116.17   71.17    8.17   64.24  215.76   64.24 
1 1 1   12    4   42 0.00  117.99   67.78   95.43   67.78   13.63   73.49  125.98   73.49 
1 1 1   12    4   43 0.00  101.91   63.39   98.62   63.39   11.85   80.33  126.49   80.33 
1 1 1   12    4   44 0.00   92.16   58.11   91.51   58.11    3.04  150.76   55.55  -29.24 
1 1 1   12    4   45 0.00   86.00   53.88   84.35   53.88   38.60  -30.50  233.37  -30.50 
1 1 1   12    5    1 0.00 3083.25   22.41 3095.68   22.41 1734.20  -12.50   68.76  -12.50 
1 1 1   12    5    2 0.00 1459.33   20.55 1498.28   20.55  802.01  -86.82    4.83  -86.82 
1 1 1   12    5    3 0.00 1069.61   17.88 1056.52   17.88  561.11    9.25    3.99 -170.75 
1 1 1   12    5    4 0.00 2620.62   18.21 2560.99   18.21 1313.81   41.95  232.03 -138.05 
1 1 1   12    5    5 0.00 2631.67   15.76 2676.96   15.76 1590.84   24.08  165.91   24.08 
1 1 1   12    5    6 1.00 1272.14   18.02 1315.31   18.02  564.30   93.44  327.24  -86.56 
1 1 1   12    5    7 0.00 1761.45   17.98 1796.17   17.98  952.10  -14.62  132.70  165.38 
1 1 1   12    5    8 0.00 1636.68   17.69 1589.20   17.69  917.98 -175.00   20.34    5.00 
1 1 1   12    5    9 0.00 1832.14   19.33 1747.60   19.33 1127.63 -107.79  160.18 -107.79 
1 1 1   12    5   10 0.00  740.72   20.72  735.94   20.72  351.16  139.19  132.22  -40.81 
1 1 1   12    5   11 0.00  709.57   17.91  704.89   17.91  438.41  -28.87   14.51  -28.87 
1 1 1   12    5   12 0.00  245.24   25.18  238.51   25.18  116.12  -65.98  452.16  -65.98 
1 1 1   12    5   13 0.00 1034.88   19.65 1075.65   19.65  662.21   69.48   55.74 -110.52 
1 1 1   12    5   14 0.00  374.89   26.46  379.67   26.46  134.23 -148.74   44.73   31.26 
1 1 1   12    5   15 0.00  910.35   18.27  940.31   18.27  667.98   76.77   99.86   76.77 
1 1 1   12    5   16 0.00 1358.57   19.59 1376.49   19.59  906.85 -155.81   75.02   24.19 
1 1 1   12    5   17 0.00  858.34   22.29  860.53   22.29  662.74 -166.11  189.22 -166.11 
1 1 1   12    5   18 0.00  178.98   44.67  238.08   44.67   31.58   23.31  202.74   23.31 
1 1 1   12    5   19 1.00  471.06   23.91  491.95   23.91  325.34  -36.48   70.31  -36.48 
1 1 1   12    5   20 0.00  874.24   19.38  920.58   19.38  752.70 -123.41  263.57 -123.41 
1 1 1   12    5   21 0.00  750.44   20.76  776.89   20.76  432.58  174.90  212.32   -5.10 
1 1 1   12    5   22 0.00  514.55   26.41  522.25   26.41  210.89   99.25  270.08  -80.75 
1 1 1   12    5   23 0.00  180.10   56.72  161.59   56.72  123.09  123.28  385.00  123.28 
1 1 1   12    5   24 0.00 1252.49   18.68 1295.51   18.68  932.40  -89.37    0.43   90.63 
1 1 1   12    5   25 0.00  875.74   20.88  872.07   20.88  851.34  -59.51  444.66  -59.51 
1 1 1   12    5   26 0.00  658.36   25.49  680.77   25.49  527.20  176.59   79.00  176.59 
1 1 1   12    5   27 0.00  684.70   26.43  642.55   26.43  401.69   36.78  196.65 -143.22 
1 1 1   12    5   28 0.00  736.32   23.51  769.18   23.51  575.67  116.44    9.75  -63.56 
1 1 1   12    5   29 0.00  562.54   28.58  658.09   28.58  545.48  -44.55  163.36  -44.55 
1 1 1   12    5   30 0.00  365.05   37.92  473.59   37.92  215.68  126.64  142.77  126.64 
1 1 1   12    5   31 0.00  169.23   69.91  105.38   69.91   93.31   76.42  279.92   76.42 
1 1 1   12    5   32 0.00  511.08   35.80  515.34   35.80  423.03 -150.34    3.42   29.66 
1 1 1   12    5   33 0.00  142.98   69.50  114.17   69.50   90.15  -82.05  261.37  -82.05 
1 1 1   12    5   34 0.00  167.31   75.65  175.34   75.65   11.72  -53.45   93.20  -53.45 
1 1 1   12    5   35 0.00  162.56   72.05  100.52   72.05   10.52   49.39   36.68   49.39 
1 1 1   12    5   36 0.00  100.79   72.58  148.62   72.58   29.43   42.93  110.39   42.93 
1 1 1   12    5   37 0.00  125.46   64.35   78.29   64.35   24.02   -1.47   80.27   -1.47 
1 1 1   12    5   38 0.00  202.03   80.78  192.21   80.78   78.31 -153.80  286.65   26.20 
1 1 1   12    5   39 0.00  137.82   75.65  136.96   75.65    7.95  -69.73  139.41  110.27 
1 1 1   12    5   40 0.00   97.77   65.60  110.24   65.60   12.86  -53.54   63.15  -53.54 
1 1 1   12    5   41 0.00  125.63   72.91  124.59   72.91   15.22 -130.17   90.30   49.83 
1 1 1   12    5   42 0.00  115.98   69.44  104.47   69.44   18.29  -70.41  183.29  -70.41 
1 1 1   12    5   43 0.00   97.17   63.47  103.31   63.47   15.23  -90.79  148.10  -90.79 
1 1 1   12    5   44 0.00   94.05   59.17   93.59   59.17    6.71   83.70   94.56  -96.30 
1 1 1   12    5   45 0.00   81.57   52.85   84.77   52.85   18.10  120.48  119.78  120.48 
1 1 1   12    6    1 0.00 3516.53    6.19 3522.82    6.19 2033.83 -131.95  216.96 -131.95 
1 1 1   12    6    2 0.00 1187.87   16.13 1210.03   16.13  627.89  -26.32   18.70  153.68 
1 1 1   12    6    3 0.00 1522.89   17.16 1565.29   17.16  691.64   88.97  289.85  -91.03 
1 1 1   12    6    4 0.00 2723.13   17.71 2698.61   17.71 1507.97   10.50   39.31 -169.50 
1 1 1   12    6    5 1.00 3066.27   14.89 3058.15   14.89 1598.51  -24.03  280.66  155.97 
1 1 1   12    6    6 0.00 1621.43   18.15 1560.30   18.15  937.97 -119.90   83.15 -119.90 
1 1 1   12    6    7 0.00  677.14   17.52  653.27   17.52  378.01   29.26  116.46   29.26 
1 1 1   12    6    8 0.00  798.78   16.46  818.68   16.46  412.51 -104.60   75.48   75.40 
1 1 1   12    6    9 0.00  728.93   19.13  753.69   19.13  374.18   52.08   77.18 -127.92 
1 1 1   12    6   10 0.00 1032.55   20.04 1019.49   20.04  693.67  136.39  208.78  136.39 
1 1 1   12    6   11 0.00 2017.41   18.05 2031.88   18.05 1519.21  134.01  401.50  134.01 
1 1 1   12    6   12 0.00  760.89   18.53  756.15   18.53  508.02   90.26   74.51   90.26 
1 1 1   12    6   13 0.00  275.08   30.25  282.61   30.25   14.53 -123.10  131.89   56.90 
1 1 1   12    6   14 0.00  830.92   18.63  856.56   18.63  469.90   74.91  175.07 -105.09 
1 1 1   12    6   15 0.00  388.90   26.02  406.14   26.02  139.10  121.74  194.56  -58.26 
1 1 1   12    6   16 0.00 1171.68   18.58 1208.26   18.58  813.03 -139.48   33.65 -139.48 
1 1 1   12    6   17 0.00  629.80   21.83  585.33   21.83  346.12  169.29   91.96  -10.71 
1 1 1   12    6   18 0.00  862.78   20.63  856.79   20.63  623.32 -109.13   86.25 -109.13 
1 1 1   12    6   19 0.00 1756.54   18.67 1810.09   18.67 1497.90 -156.71  485.21 -156.71 
1 1 1   12    6   20 0.00  449.86   23.77  499.55   23.77  178.33 -152.94  270.85   27.06 
1 1 1   12    6   21 0.00  773.16   20.09  826.76   20.09  715.42  100.07  326.00  100.07 
1 1 1   12    6   22 0.00 1066.76   19.67 1065.28   19.67  550.86   20.10  405.15 -159.90 
1 1 1   12    6   23 0.00 1276.54   18.80 1291.14   18.80  822.58 -101.51  207.87   78.49 
1 1 1   12    6   24 0.00  560.85   26.06  570.54   26.06  451.04   83.85  145.72   83.85 
1 1 1   12    6   25 0.00  743.15   23.38  757.16   23.38  636.25  117.78  195.14  117.78 
1 1 1   12    6   26 0.00  677.00   23.03  724.81   23.03  395.80    0.59  251.87 -179.41 
1 1 1   12    6   27 0.00  958.16   19.68  995.71   19.68  848.73   80.71  199.54   80.71 
1 1 1   12    6   28 0.00  276.37   51.08  275.68   51.08   64.68   69.14   39.26 -110.86 
1 1 1   12    6   29 0.00  466.23   36.83  387.75   36.83  151.81   89.92  340.17  -90.08 
1 1 1   12    6   30 0.00  402.10   38.74  531.60   38.74  332.67  161.73   41.22  -18.27 
1 1 1   12    6   31 0.00  142.47   69.68  236.26   69.68   38.62  -71.51  266.40  -71.51 
1 1 1   12    6   32 0.00  411.00   41.42  462.84   41.42  289.05   -7.89  136.44  172.11 
1 1 1   12    6   33 0.00  308.54   58.52  254.07   58.52  148.34   43.89   46.98 -136.11 
1 1 1   12    6   34 0.00  296.92   60.93  323.68   60.93  159.88  104.16  165.00  -75.84 
1 1 1   12    6   35 0.00  387.60   60.43  280.90   60.43  275.92   22.44   39.26   22.44 
1 1 1   12    6   36 0.00  389.54   61.95  300.10   61.95  294.17  168.06   30.81  -11.94 
1 1 1   12    6   37 0.00  289.87   74.15  320.47   74.15  292.68  129.70  139.97  -50.30 
1 1 1   12    6   38 0.00  101.33   73.94  162.08   73.94    8.88  -32.38   57.96  147.62 
1 1 1   12    6   39 0.00  133.22   68.12   89.19   68.12   45.74 -174.68  209.63 -174.68 
1 1 1   12    6   40 0.00  144.95   76.40  128.84   76.40   16.68  167.93   43.93  -12.07 
1 1 1   12    6   41 0.00  191.08   80.49  110.37   80.49   67.69   38.17  195.03 -141.83 
1 1 1   12    6   42 0.00  107.80   67.09  104.76   67.09   43.15 -119.44  253.55 -119.44 
1 1 1   12    6   43 0.00  101.04   62.94   98.16   62.94    6.68  -29.97  109.74  150.03 
1 1 1   12    6   44 0.00   95.34   64.08  113.00   64.08    9.99  -56.82   16.45  123.18 
1 1 1   12    6   45 0.00   85.88   54.07   85.98   54.07   44.01  120.09  263.21  120.09 
1 1 1   12    7    1 0.00 2477.99   16.19 2411.98   16.19 1213.43  -30.94  223.97  149.06 
1 1 1   12    7    2 0.00 1252.66   16.27 1232.70   16.27  497.73   65.77  363.68 -114.23 
1 1 1   12    7    3 0.00 1483.55   16.44 1479.61   16.44  746.26  -62.08  141.01  117.92 
1 1 1   12    7    4 0.00 3235.81   10.71 3160.41   10.71 1854.58  -48.94  110.47  -48.94 
1 1 1   12    7    5 0.00 1849.09   17.27 1851.66   17.27 1062.56  -82.00   48.79  -82.00 
1 1 1   12    7    6 0.00  719.35   17.35  733.04   17.35  458.14   35.38  239.19   35.38 
1 1 1   12    7    7 0.00 1691.88   18.82 1636.76   18.82  858.08   48.62  189.40 -131.38 
1 1 1   12    7    8 0.00  862.10   19.20  850.98   19.20  504.73 -171.53   58.56 -171.53 
1 1 1   12    7    9 0.00  958.39   19.33  912.41   19.33  329.94  175.63  414.64   -4.37 
1 1 1   12    7   10 0.00 1160.71   19.36 1162.85   19.36  696.81   55.93   79.94 -124.07 
1 1 1   12    7   11 0.00  828.46   20.25  829.04   20.25  682.18    0.37  367.40    0.37 
1 1 1   12    7   12 0.00 1185.19   20.18 1157.14   20.18 1009.71   29.55  521.16   29.55 
1 1 1   12    7   13 0.00  286.80   26.40  254.90   26.40    9.61 -166.50   74.03   13.50 
1 1 1   12    7   14 1.00  667.32   20.29  643.07   20.29  256.77  -45.81  340.81  134.19 
1 1 1   12    7   15 0.00  466.10   23.09  396.52   23.09  141.36   -3.02  249.39  176.98 
1 1 1   12    7   16 0.00  187.18   46.40  139.20   46.40  109.41  -50.59  322.95  -50.59 
1 1 1   12    7   17 0.00 1339.75   17.96 1342.32   17.96  929.70  172.88   32.26  172.88 
1 1 1   12    7   18 0.00 1055.74   20.80 1064.03   20.80  850.75  177.17  256.31  177.17 
1 1 1   12    7   19 1.00  442.66   26.10  398.11   26.10  224.27   49.12   52.96 -130.88 
1 1 1   12    7   20 0.00 1201.23   18.88 1245.77   18.88  948.70   36.20  163.81   36.20 
1 1 1   12    7   21 0.00 1162.22   17.68 1205.54   17.68  681.41   14.61  347.00 -165.39 
1 1 1   12    7   22 0.00  579.73   24.22  558.45   24.22  368.27  -80.04   18.32   99.96 
1 1 1   12    7   23 0.00 1391.13   17.99 1387.92   17.99 1212.72    3.68  424.33    3.68 
1 1 1   12    7   24 0.00   82.35   58.35  132.88   58.35   35.29  -98.61   83.96  -98.61 
1 1 1   12    7   25 0.00  106.49   61.13  181.55   61.13   50.35  174.98  148.39  174.98 
1 1 1   12    7   26 0.00 1000.49   19.59 1018.47   19.59  755.94   37.72   15.97 -142.28 
1 1 1   12    7   27 0.00  520.23   27.64  521.55   27.64  298.95   99.88  163.00  -80.12 
1 1 1   12    7   28 0.00 1054.84   19.75 1048.61   19.75  990.38   71.76  328.13   71.76 
1 1 1   12    7   29 1.00  958.33   21.11 1009.01   21.11  999.65   79.96  422.92   79.96 
1 1 1   12    7   30 0.00  323.11   45.81  376.68   45.81  126.82    5.43  254.73 -174.57 
1 1 1   12    7   31 0.00  341.67   48.09  360.33   48.09  177.69   29.13   92.00   29.13 
1 1 1   12    7   32 0.00  240.34   60.57  357.99   60.57  174.51  143.60   19.66  -36.40 
1 1 1   12    7   33 0.00  194.28   74.05   99.83   74.05   42.73   95.03  173.44   95.03 
1 1 1   12    7   34 0.00  437.11   43.35  457.79   43.35  463.37 -111.35  203.42 -111.35 
1 1 1   12    7   35 0.00  344.19   55.24  386.02   55.24  341.00    7.49  108.69    7.49 
1 1 1   12    7   36 0.00  128.34   69.05  113.43   69.05   17.66  -15.18   90.04  -15.18 
1 1 1   12    7   37 0.00  124.31   77.23  176.45   77.23   42.49  -15.82   95.85  164.18 
1 1 1   12    7   38 0.00  148.12   78.36  138.82   78.36   25.29  -24.73  123.27  155.27 
1 1 1   12    7   39 0.00  142.22   69.15   86.24   69.15    8.60  130.79   64.93  130.79 
1 1 1   12    7   40 0.00   90.98   53.84   70.33   53.84   88.52  154.39  245.76  154.39 
1 1 1   12    7   41 0.00  130.57   81.93  191.03   81.93  116.54    3.87   57.57 -176.13 
1 1 1   12    7   42 0.00  124.39   76.24  129.50   76.24   19.78  -68.04  182.43  111.96 
1 1 1   12    7   43 0.00  108.90   70.34  122.06   70.34   29.37   -5.77   31.90  174.23 
1 1 1   12    7   44 0.00   95.44   58.72   90.99   58.72    3.07 -132.40   41.48   47.60 
1 1 1   12    8    1 0.00 2169.64   13.94 2174.45   13.94 1267.75   78.22  143.20   78.22 
1 1 1   12    8    2 0.00 1155.45   14.77 1150.28   14.77  690.06 -142.08  146.97 -142.08 
1 1 1   12    8    3 0.00 2177.47   15.09 2171.67   15.09 1331.55 -126.24  252.63 -126.24 
1 1 1   12    8    4 0.00  829.60   15.79  831.64   15.79  455.42 -168.04   49.16 -168.04 
1 1 1   12    8    5 0.00 1969.52   17.29 1997.73   17.29 1208.55  -72.21  194.48  -72.21 
1 1 1   12    8    6 0.00 1233.50   16.53 1247.85   16.53  659.61 -102.63   71.97   77.37 
1 1 1   12    8    7 0.00  871.81   17.29  874.01   17.29  295.93   30.07  384.73 -149.93 
1 1 1   12    8    8 0.00 1413.70   20.32 1427.70   20.32  886.74  -50.89  145.26  -50.89 
1 1 1   12    8    9 0.00 1194.93   20.03 1193.15   20.03  773.22   45.79  175.78   45.79 
1 1 1   12    8   10 0.00  766.90   20.88  772.14   20.88  477.70  110.36   17.73  110.36 
1 1 1   12    8   11 0.00  912.47   22.24  921.59   22.24  425.27  -43.26  314.98  136.74 
1 1 1   12    8   12 0.00  320.49   27.32  342.14   27.32   39.95   66.93  239.62 -113.07 
1 1 1   12    8   13 0.00  288.41   29.08  359.88   29.08   40.58 -114.38    5.12 -114.38 
1 1 1   12    8   14 0.00  209.50   28.41  218.69   28.41   58.06 -148.34  289.11 -148.34 
1 1 1   12    8   15 1.00   27.14   34.46   79.93   34.46   74.21   54.28  154.24   54.28 
1 1 1   12    8   16 0.00  416.21   23.44  418.38   23.44  220.01 -144.92   21.57   35.08 
1 1 1   12    8   17 0.00  240.35   37.82  272.19   37.82   29.59  157.27   71.07  -22.73 
1 1 1   12    8   18 0.00 1071.87   20.62 1114.19   20.62  799.81   51.51  103.29   51.51 
1 1 1   12    8   19 0.00  976.23   19.48 1004.71   19.48  764.85   12.79  163.26   12.79 
1 1 1   12    8   20 0.00 1158.27   18.50 1146.45   18.50  901.68  -29.25  176.10  -29.25 
1 1 1   12    8   21 0.00 1019.84   20.44  976.97   20.44  717.66  -15.13    9.50  -15.13 
1 1 1   12    8   22 0.00  995.30   21.49 1019.24   21.49  822.11  -44.84  237.16  -44.84 
1 1 1   12    8   23 0.00  567.63   23.25  592.57   23.25  282.42   85.71  234.67  -94.29 
1 1 1   12    8   24 0.00  969.88   19.05 1003.15   19.05  593.31  163.40  251.86  -16.60 
1 1 1   12    8   25 0.00  736.42   22.15  797.73   22.15  672.77   77.13  239.75   77.13 
1 1 1   12    8   26 0.00  719.14   23.40  714.35   23.40  564.41   81.31   73.14   81.31 
1 1 1   12    8   27 0.00  599.24   25.73  654.89   25.73  398.09   38.98  141.57 -141.02 
1 1 1   12    8   28 0.00  680.68   24.38  699.86   24.38  458.93   48.96  151.77 -131.04 
1 1 1   12    8   29 0.00  707.70   24.92  760.13   24.92  726.40  -28.48  310.51  -28.48 
1 1 1   12    8   30 0.00  643.66   27.71  637.18   27.71  575.41 -120.06  133.99 -120.06 
1 1 1   12    8   31 0.00  758.18   29.62  738.80   29.62  696.96  161.03  141.07  161.03 
1 1 1   12    8   32 0.00  372.83   46.73  430.06   46.73  141.80  -69.33  381.48  110.67 
1 1 1   12    8   33 0.00  279.53   69.21  223.60   69.21   91.93  -90.13  115.86   89.87 
1 1 1   12    8   34 0.00  151.99   77.85  175.47   77.85   22.58 -101.27  124.13 -101.27 
1 1 1   12    8   35 0.00  257.26   61.86  369.40   61.86  206.62  104.25  126.89  -75.75 
1 1 1   12    8   36 0.00  224.87   73.06  282.94   73.06  242.04 -157.09   16.94   22.91 
1 1 1   12    8   37 1.00  252.42   67.23  317.70   67.23  334.54  114.85   19.91  114.85 
1 1 1   12    8   38 0.00  122.89   74.67  133.42   74.67    4.19  -32.35  139.25  -32.35 
1 1 1   12    8   39 0.00  427.23   73.24  296.57   73.24  634.12 -104.52  372.53 -104.52 
1 1 1   12    8   40 0.00  117.60   75.68  154.77   75.68   25.65 -115.05   92.17   64.95 
1 1 1   12    8   41 0.00  136.42   72.97  122.53   72.97   25.96 -123.30   92.60   56.70 
1 1 1   12    8   42 0.00  104.98   64.59   96.67   64.59   26.96 -166.13  148.65 -166.13 
1 1 1   12    8   43 0.00   98.85   66.06  112.45   66.06   14.36 -166.63  176.24   13.37 
1 1 1   12    8   44 1.00   86.28   55.20   86.35   55.20   15.44  -55.39  140.73  -55.39 
1 1 1   12    9    1 0.00  742.86   14.87  767.02   14.87  246.06  102.28  290.02  -77.72 
1 1 1   12    9    2 0.00  835.19   14.81  840.29   14.81  436.37  -28.86   10.57  -28.86 
1 1 1   12    9    3 0.00 1127.19   14.83 1113.53   14.83  672.72  167.58  149.80  167.58 
1 1 1   12    9    4 0.00  911.36   15.15  911.44   15.15  509.31  133.25   38.05  133.25 
1 1 1   12    9    5 0.00 2841.82   15.07 2865.85   15.07 1563.23 -175.52   92.50    4.48 
1 1 1   12    9    6 0.00 1620.18   17.07 1734.54   17.07 1070.40 -153.60  250.88 -153.60 
1 1 1   12    9    7 0.00 2046.45   18.00 2037.61   18.00 1293.68  -97.63  253.83  -97.63 
1 1 1   12    9    8 0.00 1062.92   20.66 1045.25   20.66  427.80  -73.37  343.58  106.63 
1 1 1   12    9    9 0.00 1567.17   17.70 1599.82   17.70 1062.16  111.38  125.74  111.38 
1 1 1   12    9   10 0.00  461.18   22.20  517.56   22.20  160.13  -65.60  242.00  114.40 
1 1 1   12    9   11 0.00  315.47   26.19  306.61   26.19   43.57 -117.87  148.39   62.13 
1 1 1   12    9   12 0.00 1278.56   21.21 1264.03   21.21  950.26  114.43  256.09  114.43 
1 1 1   12    9   13 0.00  580.49   22.32  585.58   22.32  439.58   11.27  192.72   11.27 
1 1 1   12    9   14 0.00 1119.25   20.50 1081.26   20.50  778.51  -85.78   94.62  -85.78 
1 1 1   12    9   15 0.00  523.20   23.57  551.17   23.57  287.94  -47.11   82.19  132.89 
1 1 1   12    9   16 0.00  291.40   26.72  322.37   26.72   63.25  142.04  187.68  -37.96 
1 1 1   12    9   17 0.00 1178.03   19.29 1216.03   19.29  706.81   57.27  211.08 -122.73 
1 1 1   12    9   18 0.00  357.20   26.59  434.76   26.59   64.84   90.69  366.75  -89.31 
1 1 1   12    9   19 0.00 1081.59   19.13 1095.94   19.13  837.00  -31.10  165.93  -31.10 
1 1 1   12    9   20 0.00  585.82   22.44  592.75   22.44  247.78 -100.10  307.42   79.90 
1 1 1   12    9   21 0.00  440.14   27.10  403.31   27.10  218.68 -122.42   67.32   57.58 
1 1 1   12    9   22 1.00  323.28   29.85  356.17   29.85  108.69 -137.32  176.21   42.68 
1 1 1   12    9   23 0.00  365.86   26.50  424.94   26.50  211.84  171.65   53.29   -8.35 
1 1 1   12    9   24 0.00  631.45   22.24  668.73   22.24  282.58 -104.44  361.97   75.56 
1 1 1   12    9   25 0.00 1642.00   17.19 1652.52   17.19 1385.45    6.03  299.84    6.03 
1 1 1   12    9   26 0.00 1364.39   19.06 1387.31   19.06 1087.69   -6.50   76.64   -6.50 
1 1 1   12    9   27 0.00 1174.31   19.70 1163.08   19.70 1023.77  -29.78  240.97  -29.78 
1 1 1   12    9   28 0.00  112.45   56.80   78.53   56.80   68.15   76.62  155.54   76.62 
1 1 1   12    9   29 0.00  379.73   39.61  357.31   39.61  199.38 -122.58  108.32   57.42 
1 1 1   12    9   30 0.00  725.68   25.99  796.51   25.99  686.17  109.52  130.62  109.52 
1 1 1   12    9   31 0.00  387.03   40.42  475.30   40.42  296.57 -113.03   86.55   66.97 
1 1 1   12    9   32 0.00  497.69   36.06  525.68   36.06  445.03  155.00   44.87  155.00 
1 1 1   12    9   33 0.00  395.19   58.46  250.81   58.46  209.96 -168.67   46.54   11.33 
1 1 1   12    9   34 0.00  345.50   62.73  247.44   62.73  188.72 -167.82   52.25   12.18 
1 1 1   12    9   35 0.00  313.08   62.25  316.82   62.25  279.24 -177.47   71.90 -177.47 
1 1 1   12    9   36 0.00  499.98   42.75  473.14   42.75  665.27   12.03  183.28   12.03 
1 1 1   12    9   37 0.00   93.63   72.07  164.26   72.07    5.75   89.10  113.67  -90.90 
1 1 1   12    9   38 0.00  180.96   78.66  149.39   78.66   11.95   40.53    5.73 -139.47 
1 1 1   12    9   39 0.00  182.30   85.74  201.04   85.74  145.44  135.48   28.82  -44.52 
1 1 1   12    9   40 0.00  113.65   65.39   95.69   65.39   75.82    5.33  326.82    5.33 
1 1 1   12    9   41 0.00  118.60   68.41  114.44   68.41    0.33 -105.42  111.30   74.58 
1 1 1   12    9   42 0.00  102.50   65.10  102.63   65.10    4.01  -47.59   88.43  -47.59 
1 1 1   12    9   43 0.00   95.86   60.44   93.71   60.44    6.83    1.58  117.37 -178.42 
1 1 1   12    9   44 0.00   88.03   55.74   86.96   55.74   11.43  -76.88  130.67  -76.88 
1 1 1   12   10    1 0.00  136.98   29.48  145.76   29.48   29.05 -164.63   71.31 -164.63 
1 1 1   12   10    2 0.00 2105.38   14.33 2066.13   14.33 1082.91 -157.47  126.70   22.53 
1 1 1   12   10    3 0.00 2017.34   14.64 1987.77   14.64 1148.05 -170.15   86.13 -170.15 
1 1 1   12   10    4 0.00  669.39   17.32  697.69   17.32  377.87   89.95   55.07   89.95 
1 1 1   12   10    5 0.00  209.56   25.49  219.25   25.49   69.38  -38.87  256.07  -38.87 
1 1 1   12   10    6 0.00  132.77   34.18  146.86   34.18   62.94 -142.59  153.18 -142.59 
1 1 1   12   10    7 0.00 1425.03   17.62 1460.99   17.62  720.88 -147.81  338.41   32.19 
1 1 1   12   10    8 0.00  896.01   19.44  896.83   19.44  508.29   68.63   70.68 -111.37 
1 1 1   12   10    9 0.00  275.19   22.38  320.79   22.38   33.55  -30.76  108.48  149.24 
1 1 1   12   10   10 0.00  134.11   45.00  135.58   45.00  133.51 -143.15  317.13 -143.15 
1 1 1   12   10   11 0.00  468.41   25.02  521.03   25.02  249.18 -169.51  133.02 -169.51 
1 1 1   12   10   12 0.00  801.34   22.09  784.59   22.09  506.73   19.37    8.68   19.37 
1 1 1   12   10   13 0.00  841.05   23.44  847.03   23.44  386.89  -42.58  325.12  137.42 
1 1 1   12   10   14 0.00  477.25   28.52  424.39   28.52  267.93   89.37   54.25   89.37 
1 1 1   12   10   15 0.00 1101.72   27.52 1101.33   27.52  731.71  131.80   21.09  131.80 
1 1 1   12   10   16 0.00  413.33   30.90  403.38   30.90  183.10  117.86  103.60  -62.14 
1 1 1   12   10   17 0.00  544.70   24.96  592.24   24.96  416.27  -42.51  136.58  -42.51 
1 1 1   12   10   18 0.00  980.05   19.56  985.04   19.56  641.26 -109.26   53.51   70.74 
1 1 1   12   10   19 0.00 1099.84   21.00 1109.61   21.00  956.65  -18.74  393.33  -18.74 
1 1 1   12   10   20 0.00 1287.83   20.09 1309.99   20.09  994.33 -129.28  152.91 -129.28 
1 1 1   12   10   21 0.00  301.27   32.75  338.62   32.75  104.91 -147.51    1.55   32.49 
1 1 1   12   10   22 0.00  314.34   30.41  330.15   30.41  123.17  168.44   61.47  -11.56 
1 1 1   12   10   23 0.00  670.93   20.82  691.02   20.82  641.51   51.96  390.85   51.96 
1 1 1   12   10   24 0.00 1217.83   18.07 1225.61   18.07 1072.74  -57.35  369.83  -57.35 
1 1 1   12   10   25 0.00  385.08   30.27  397.35   30.27  200.78   18.76  102.97 -161.24 
1 1 1   12   10   26 0.00 1182.65   19.27 1230.64   19.27 1062.81 -104.44  301.97 -104.44 
1 1 1   12   10   27 1.00  246.08   54.48  235.89   54.48   95.59  -35.41  491.92  -35.41 
1 1 1   12   10   28 0.00  723.66   25.06  744.14   25.06  497.15  136.13  144.29  -43.87 
1 1 1   12   10   29 0.00   90.57   57.89  101.26   57.89   65.45   27.62  149.73   27.62 
1 1 1   12   10   30 0.00  480.98   33.80  532.69   33.80  316.37  170.14  168.80   -9.86 
1 1 1   12   10   31 0.00  199.24   72.00  178.56   72.00    2.62 -112.96   63.85   67.04 
1 1 1   12   10   32 0.00  686.88   27.86  754.88   27.86  663.69 -156.63   87.05 -156.63 
1 1 1   12   10   33 0.00  136.75   64.72   81.11   64.72   42.73    6.42  110.96    6.42 
1 1 1   12   10   34 1.00  552.75   34.76  561.14   34.76  620.98   80.08  263.16   80.08 
1 1 1   12   10   35 0.00  259.20   64.24  339.04   64.24  239.75  -15.68   11.97  -15.68 
1 1 1   12   10   36 0.00  518.92   39.40  495.82   39.40  690.63  105.30  180.80  105.30 
1 1 1   12   10   37 0.00  193.63   74.90  264.91   74.90  191.52 -163.33  113.95   16.67 
1 1 1   12   10   38 0.00  119.28   70.79  128.67   70.79   21.78   39.43  177.35   39.43 
1 1 1   12   10   39 0.00  316.30   79.14  192.75   79.14  255.92 -149.04  117.40   30.96 
1 1 1   12   10   40 0.00  196.06   85.78  142.04   85.78  121.57   48.20    9.33 -131.80 
1 1 1   12   10   41 0.00  112.16   81.37  158.16   81.37   47.30   -2.82  100.27  177.18 
1 1 1   12   10   42 0.00  136.18   81.27  140.89   81.27   59.99 -158.40   25.84   21.60 
1 1 1   12   10   43 0.00  100.37   62.96   99.82   62.96   18.04   21.37   63.22 -158.63 
1 1 1   12   10   44 0.00   87.67   53.03   76.83   53.03   20.11   29.97  122.38   29.97 
1 1 1   12   11    1 0.00  671.87   16.64  654.68   16.64  238.73 -149.46  205.47   30.54 
1 1 1   12   11    2 0.00  825.91   16.39  841.68   16.39  593.75  144.82  353.77  144.82 
1 1 1   12   11    3 0.00 1375.30   15.77 1375.70   15.77  683.50    7.71  133.61 -172.29 
1 1 1   12   11    4 0.00 1840.60   15.23 1824.88   15.23  998.65   31.10   29.10 -148.90 
1 1 1   12   11    5 0.00  575.15   16.32  580.58   16.32  240.49   12.83  108.01 -167.17 
1 1 1   12   11    6 0.00 1645.48   15.45 1646.56   15.45 1028.31  129.84   50.17  129.84 
1 1 1   12   11    7 0.00 1247.09   19.29 1278.26   19.29  779.27  118.42   18.04  118.42 
1 1 1   12   11    8 0.00  295.90   22.48  299.57   22.48   16.55  112.26  199.27  -67.74 
1 1 1   12   11    9 0.00 1211.50   19.46 1237.49   19.46  650.81  -69.63  226.99  110.37 
1 1 1   12   11   10 0.00  410.75   27.35  449.86   27.35  109.70  170.98  254.79   -9.02 
1 1 1   12   11   11 0.00 1126.07   24.23 1109.39   24.23  939.31   26.14  467.69   26.14 
1 1 1   12   11   12 0.00  636.18   25.88  640.41   25.88  474.34    8.52  184.58    8.52 
1 1 1   12   11   13 0.00  417.22   29.44  336.77   29.44   90.78  -89.91  252.13   90.09 
1 1 1   12   11   14 1.00  376.50   34.19  364.58   34.19   97.88  -24.35   39.02  -24.35 
1 1 1   12   11   15 0.00  780.02   24.93  783.63   24.93  671.21   55.79  373.66   55.79 
1 1 1   12   11   16 0.00  994.76   24.80  973.48   24.80  653.83   61.75   12.33   61.75 
1 1 1   12   11   17 0.00   73.83   50.16  225.29   50.16  106.49  160.57  314.59  160.57 
1 1 1   12   11   18 0.00  287.99   34.02  462.43   34.02  188.77  118.80   44.30  118.80 
1 1 1   12   11   19 0.00  617.72   22.48  605.42   22.48  237.67  111.17  345.38  -68.83 
1 1 1   12   11   20 0.00  666.79   20.63  663.28   20.63  454.59 -144.24   47.33 -144.24 
1 1 1   12   11   21 0.00 1191.11   19.44 1206.80   19.44  804.71   46.41   46.80 -133.59 
1 1 1   12   11   22 0.00  635.51   21.20  648.19   21.20  465.44   20.64   77.20   20.64 
1 1 1   12   11   23 0.00  710.58   19.88  754.52   19.88  481.48  164.18   55.46  -15.82 
1 1 1   12   11   24 0.00  516.04   24.13  504.12   24.13  229.85 -140.56  243.73   39.44 
1 1 1   12   11   25 0.00 1085.53   19.34 1101.15   19.34  932.48 -145.98  255.36 -145.98 
1 1 1   12   11   26 0.00  265.08   37.54  344.52   37.54   94.06  -53.68  160.40  126.32 
1 1 1   12   11   27 0.00  183.58   52.96  301.12   52.96   19.53   93.67  198.98  -86.33 
1 1 1   12   11   28 0.00  217.31   63.89  135.28   63.89   48.98  -16.46  211.71  -16.46 
1 1 1   12   11   29 0.00  685.11   25.77  761.01   25.77  588.81  -19.06   41.36  -19.06 
1 1 1   12   11   30 0.00  183.07   71.57  104.30   71.57   24.28   63.49   85.90   63.49 
1 1 1   12   11   31 0.00  185.81   62.97  338.48   62.97   89.56   91.12  149.76  -88.88 
1 1 1   12   11   32 0.00  529.05   36.87  537.97   36.87  574.34 -174.57  302.30 -174.57 
1 1 1   12   11   33 0.00  368.83   49.71  410.60   49.71  167.90   82.70  318.12  -97.30 
1 1 1   12   11   34 0.00  378.44   54.90  478.24   54.90  415.78  -79.67  119.85  -79.67 
1 1 1   12   11   35 0.00  455.41   44.76  463.87   44.76  462.74   22.04   89.39   22.04 
1 1 1   12   11   36 0.00   98.66   59.53   85.64   59.53   86.07 -104.09  259.71 -104.09 
1 1 1   12   11   37 0.00   70.86   67.14  149.91   67.14   40.80  161.09  209.36  161.09 
1 1 1   12   11   38 0.00  121.60   79.42  249.23   79.42  107.91  112.08  147.29  -67.92 
1 1 1   12   11   39 0.00  101.88   65.78  114.87   65.78   36.33  -55.89  185.43  -55.89 
1 1 1   12   11   40 1.00  142.06   73.29  113.22   73.29   18.31   48.49   65.06 -131.51 
1 1 1   12   11   41 0.00  138.42   81.24  126.40   81.24   36.64  -73.54   93.26  106.46 
1 1 1   12   11   42 0.00  115.26   77.77  153.83   77.77   51.49 -112.87    1.85 -112.87 
1 1 1   12   11   43 0.00  107.99   66.40  112.65   66.40   46.11  111.64   62.17  -68.36 
1 1 1   12   11   44 0.00   90.84   58.80   98.79   58.80    5.75 -161.53   80.15   18.47 
1 1 1   13    1    1 0.00  908.48   21.00  910.63   21.00  444.65   -8.95   92.90  171.05 
1 1 1   13    1    2 0.00 1560.10   23.72 1597.59   23.72  564.59   92.12  639.55  -87.88 
1 1 1   13    1    3 0.00 3313.40   37.16 3283.49   37.16 1936.20  152.93  156.97  152.93 
1 1 1   13    1    4 0.00 2452.24   29.13 2436.27   29.13 1444.99  153.42  152.28  153.42 
1 1 1   13    1    5 0.00 2179.51   26.99 2205.90   26.99 1458.80 -158.15  409.32 -158.15 
1 1 1   13    1    6 0.00 1467.42   20.98 1464.64   20.98  908.16  150.84  157.63  150.84 
1 1 1   13    1    7 0.00 1656.36   19.68 1678.42   19.68  807.64  175.21  297.39   -4.79 
1 1 1   13    1    8 0.00   75.68   34.64   99.31   34.64  117.04 -159.78  244.94 -159.78 
1 1 1   13    1    9 1.00 1509.35   22.79 1501.64   22.79  944.35 -121.45  143.42 -121.45 
1 1 1   13    1   10 0.00  797.50   16.95  795.17   16.95  451.91  127.99   11.27  127.99 
1 1 1   13    1   11 0.00  833.11   17.12  854.68   17.12  593.66  117.47  152.22  117.47 
1 1 1   13    1   12 0.00  272.85   25.58  251.75   25.58    1.05   90.65   12.22  -89.35 
1 1 1   13    1   13 0.00 1591.99   18.34 1629.48   18.34 1009.99  -33.66   91.56  146.34 
1 1 1   13    1   14 0.00  624.93   18.88  597.08   18.88  252.06  126.62  256.58  -53.38 
1 1 1   13    1   15 0.00  601.97   19.09  639.36   19.09  309.96  -56.51  173.99  123.49 
1 1 1   13    1   16 0.00  730.72   21.31  769.90   21.31  515.74  152.67   52.86  152.67 
1 1 1   13    1   17 0.00 1049.33   24.73  995.32   24.73  727.30   -4.69  108.42   -4.69 
1 1 1   13    1   18 0.00  766.58   20.93  746.98   20.93  483.98  -25.07   24.14  154.93 
1 1 1   13    1   19 0.00  491.42   22.79  486.19   22.79  351.66  -98.14  174.92  -98.14 
1 1 1   13    1   20 0.00  173.14   53.40  157.28   53.40  112.42  -53.34  338.44  -53.34 
1 1 1   13    1   21 0.00 1482.48   16.36 1441.65   16.36  895.09   64.58  277.80 -115.42 
1 1 1   13    1   22 0.00  277.33   46.18  218.09   46.18    9.75  123.03  249.98  123.03 
1 1 1   13    1   23 1.00  526.27   25.23  502.96   25.23  251.28  116.09  173.27  -63.91 
1 1 1   13    1   24 0.00 1146.20   19.03 1134.26   19.03 1011.59  -20.23  412.98  -20.23 
1 1 1   13    1   25 0.00 1999.71   14.73 1990.35   14.73 1567.91 -157.22  214.40 -157.22 
1 1 1   13    1   26 0.00  836.86   20.80  859.22   20.80  604.63  166.22   25.72  -13.78 
1 1 1   13    1   27 0.00  995.45   19.54 1026.78   19.54  589.46  -84.54  342.33   95.46 
1 1 1   13    1   28 0.00   74.52   62.48  173.59   62.48   67.89  -56.61  180.47  -56.61 
1 1 1   13    1   29 0.00 1115.62   20.17 1068.05   20.17  980.64  122.07  249.45  122.07 
1 1 1   13    1   30 0.00  123.04   63.75   91.52   63.75   74.27  151.80  177.77  151.80 
1 1 1   13    1   31 0.00  775.70   27.15  800.86   27.15  649.81   23.29   14.40   23.29 
1 1 1   13    1   32 0.00  387.46   52.85  405.85   52.85  238.88   74.21  136.53 -105.79 
1 1 1   13    1   33 0.00  332.77   69.93  238.15   69.93   83.89  -20.22  251.96  159.78 
1 1 1   13    1   34 0.00  290.29   78.91   81.76   78.91   15.03   25.88  145.32 -154.12 
1 1 1   13    1   35 0.00  281.40   66.42  408.87   66.42  255.51 -118.58   40.31   61.42 
1 1 1   13    1   36 0.00  105.62   63.38   93.80   63.38  153.00  171.79  392.36  171.79 
1 1 1   13    1   37 0.00  139.13   85.02  185.76   85.02   57.82  -59.97  426.08  -59.97 
1 1 1   13    1   38 0.00  165.42   85.29  177.59   85.29   59.54  125.13  207.52  -54.87 
1 1 1   13    1   39 0.00  119.94   67.68   99.87   67.68    3.17   31.89   15.47   31.89 
1 1 1   13    1   40 0.00  135.07   75.82  132.91   75.82   17.76   15.81   79.60 -164.19 
1 1 1   13    1   41 0.00  124.75   73.85  137.60   73.85   17.52  131.58   40.95  -48.42 
1 1 1   13    1   42 0.00  112.13   67.96  101.59   67.96    9.41   85.82   93.60   85.82 
1 1 1   13    1   43 0.00  108.65   68.61  112.77   68.61    6.57   38.79   45.12 -141.21 
1 1 1   13    1   44 0.00   88.55   55.34   83.57   55.34   13.85 -167.11  134.71 -167.11 
1 1 1   13    1   45 0.00   83.53   54.73   90.27   54.73    1.46  165.75   20.16  165.75 
1 1 1   13    2    1 0.00  621.89   22.24  590.25   22.24  238.88  139.91  118.58  -40.09 
1 1 1   13    2    2 0.00 1602.06   24.21 1580.50   24.21  882.34  134.13    8.38  134.13 
1 1 1   13    2    3 0.00 1905.99   24.91 1907.21   24.91 1023.40   72.22   65.51 -107.78 
1 1 1   13    2    4 0.00 2072.40   26.56 2072.97   26.56 1205.96 -142.92  114.38 -142.92 
1 1 1   13    2    5 0.00 1496.98   20.12 1490.77   20.12  684.28   20.04  319.75 -159.96 
1 1 1   13    2    6 0.00 1710.39   20.57 1705.13   20.57 1019.34  105.88  101.01  105.88 
1 1 1   13    2    7 0.00 1355.90   18.86 1349.19   18.86  834.19   58.39  144.95   58.39 
1 1 1   13    2    8 0.00 1431.47   18.85 1432.89   18.85  832.91  -76.60   21.51  -76.60 
1 1 1   13    2    9 0.00  576.61   18.87  571.28   18.87  285.99   -9.73   27.53  170.27 
1 1 1   13    2   10 0.00  397.71   18.29  372.38   18.29   85.48 -170.16  192.79    9.84 
1 1 1   13    2   11 0.00 1080.40   19.52 1065.81   19.52  503.84   26.35  356.58 -153.65 
1 1 1   13    2   12 0.00 1018.83   16.93 1046.95   16.93  551.70   59.72  217.44 -120.28 
1 1 1   13    2   13 0.00  391.16   21.48  394.91   21.48  136.48  101.57  117.94  -78.43 
1 1 1   13    2   14 0.00 1355.32   18.24 1370.50   18.24  780.89 -139.69  246.80   40.31 
1 1 1   13    2   15 0.00  467.78   22.05  474.92   22.05   91.49   11.80  410.66 -168.20 
1 1 1   13    2   16 0.00  378.15   28.79  402.43   28.79  123.39  -73.82  215.43  106.18 
1 1 1   13    2   17 0.00  351.91   35.37  343.50   35.37   69.93   15.47  254.34 -164.53 
1 1 1   13    2   18 0.00 1377.83   18.13 1380.54   18.13  874.49  155.78  123.38  -24.22 
1 1 1   13    2   19 0.00  749.01   21.46  774.58   21.46  553.85   96.53   98.34   96.53 
1 1 1   13    2   20 0.00 1215.75   18.14 1249.77   18.14 1112.42  151.13  523.79  151.13 
1 1 1   13    2   21 0.00  704.96   20.56  714.64   20.56  599.36   97.03  253.85   97.03 
1 1 1   13    2   22 0.00 1377.99   16.15 1407.95   16.15  843.48 -103.88  251.03   76.12 
1 1 1   13    2   23 0.00 1126.11   17.34 1135.24   17.34  658.28  -89.97  274.78   90.03 
1 1 1   13    2   24 0.00  701.64   21.56  689.51   21.56  564.56  112.57  182.96  112.57 
1 1 1   13    2   25 0.00  708.22   21.81  752.96   21.81  513.10  147.38    7.72  -32.62 
1 1 1   13    2   26 0.00  214.59   54.80  232.89   54.80    6.97  101.54  151.06  -78.46 
1 1 1   13    2   27 0.00 1221.35   18.19 1234.60   18.19  859.64   69.30  145.78 -110.70 
1 1 1   13    2   28 0.00  647.02   25.68  635.20   25.68  503.24  105.76   61.61  105.76 
1 1 1   13    2   29 0.00  523.70   33.08  536.68   33.08  439.06  176.96  113.57  176.96 
1 1 1   13    2   30 0.00  363.47   47.04  339.17   47.04  209.17  -22.03   42.65  -22.03 
1 1 1   13    2   31 0.00  591.84   33.48  587.19   33.48  446.04  -91.61   52.77   88.39 
1 1 1   13    2   32 0.00  404.92   45.06  442.12   45.06  390.17  100.31  185.95  100.31 
1 1 1   13    2   33 0.00  705.93   30.71  766.99   30.71  742.15  -48.95  216.19  -48.95 
1 1 1   13    2   34 0.00  194.61   79.99  158.83   79.99   47.66   -3.60  270.74   -3.60 
1 1 1   13    2   35 0.00  225.83   87.02  236.13   87.02   48.85   24.44   22.59 -155.56 
1 1 1   13    2   36 0.00  492.73   50.58  476.27   50.58  459.25   77.52   12.95   77.52 
1 1 1   13    2   37 0.00  144.72   81.46  184.28   81.46   10.35 -166.21   12.85   13.79 
1 1 1   13    2   38 0.00  352.83   68.03  390.79   68.03  599.88   41.02  335.86   41.02 
1 1 1   13    2   39 0.00   95.22   62.24   98.03   62.24   26.22 -128.65   86.51 -128.65 
1 1 1   13    2   40 0.00  139.76   77.46  138.84   77.46   27.88 -160.38   77.73   19.62 
1 1 1   13    2   41 0.00   83.55   66.20  130.02   66.20   20.45   54.84  156.95   54.84 
1 1 1   13    2   42 0.00  115.40   71.63  114.42   71.63    1.81 -163.69   83.70   16.31 
1 1 1   13    2   43 0.00   96.22   61.29   95.66   61.29    1.30 -169.51   35.79   10.49 
1 1 1   13    2   44 0.00   85.38   54.79   85.52   54.79   12.08 -163.52  117.76 -163.52 
1 1 1   13    2   45 0.00   78.29   50.72   79.98   50.72   19.96   60.24  100.36   60.24 
1 1 1   13    3    1 0.00 2007.30   27.34 2005.94   27.34 1149.40   20.28   82.16   20.28 
1 1 1   13    3    2 0.00 2698.60   32.18 2651.00   32.18 1501.11   26.91   40.45   26.91 
1 1 1   13    3    3 0.00 1387.65   21.78 1355.67   21.78  825.34  132.30  167.30  132.30 
1 1 1   13    3    4 0.00 2720.21   24.17 2702.29   24.17 1806.85   10.46  542.51   10.46 
1 1 1   13    3    5 0.00 3491.39   17.64 3350.47   17.64 2111.99  108.52  325.78  108.52 
1 1 1   13    3    6 0.00 1255.32   17.77 1281.33   17.77  717.66  134.62   21.57  134.62 
1 1 1   13    3    7 0.00  880.45   16.73  888.58   16.73  423.67  -89.56  117.00   90.44 
1 1 1   13    3    8 0.00  460.37   17.12  447.04   17.12  152.16  -56.19   71.69  -56.19 
1 1 1   13    3    9 0.00 2779.13   26.74 2842.42   26.74 1697.09  172.98  109.13  172.98 
1 1 1   13    3   10 0.00  802.31   17.14  821.40   17.14  340.17 -104.81  241.91   75.19 
1 1 1   13    3   11 0.00  538.17   18.56  541.96   18.56  301.97   60.23    0.96 -119.77 
1 1 1   13    3   12 0.00  159.19   33.65  145.92   33.65   77.49   75.55  197.99   75.55 
1 1 1   13    3   13 0.00  352.14   22.51  328.79   22.51   20.91 -143.72  312.36   36.28 
1 1 1   13    3   14 0.00  283.14   26.94  275.35   26.94   47.68 -132.94   55.89   47.06 
1 1 1   13    3   15 0.00  774.95   20.50  769.31   20.50  667.64   47.01  361.78   47.01 
1 1 1   13    3   16 0.00  331.61   32.04  311.72   32.04  103.71   98.13   71.46  -81.87 
1 1 1   13    3   17 0.00 1227.46   22.27 1230.41   22.27  867.41  114.07   94.47  114.07 
1 1 1   13    3   18 0.00  991.90   19.19 1027.40   19.19  727.73  102.04  101.35  102.04 
1 1 1   13    3   19 0.00  736.30   22.70  722.36   22.70  511.18   25.86   55.96   25.86 
1 1 1   13    3   20 0.00 1112.66   18.34 1123.08   18.34  916.76    3.61  287.76    3.61 
1 1 1   13    3   21 0.00  432.42   29.99  442.93   29.99  172.68  162.97  217.70  -17.03 
1 1 1   13    3   22 0.00 1432.36   16.81 1464.44   16.81 1123.03 -168.11  228.26 -168.11 
1 1 1   13    3   23 0.00  351.80   30.53  379.87   30.53  186.17 -113.55    8.31   66.45 
1 1 1   13    3   24 0.00 1878.91   15.09 1933.99   15.09 1479.15  110.83  193.85  110.83 
1 1 1   13    3   25 0.00  341.33   37.40  308.77   37.40   89.00  -82.75  212.60   97.25 
1 1 1   13    3   26 0.00  949.41   19.71  997.55   19.71  773.25   71.17  108.10   71.17 
1 1 1   13    3   27 0.00  352.33   42.61  324.73   42.61  167.96   70.02   20.35 -109.98 
1 1 1   13    3   28 0.00  615.06   28.08  612.64   28.08  525.20 -104.73  158.08 -104.73 
1 1 1   13    3   29 0.00  217.41   68.18  105.01   68.18  106.14  -78.30  348.27  -78.30 
1 1 1   13    3   30 0.00  223.78   69.41  107.58   69.41  161.78  134.32  501.82  134.32 
1 1 1   13    3   31 0.00  482.58   35.30  559.88   35.30  478.30  132.92  154.65  132.92 
1 1 1   13    3   32 0.00  546.21   35.15  535.15   35.15  413.32  147.61   64.07  -32.39 
1 1 1   13    3   33 0.00  301.95   53.57  485.60   53.57  340.30  -61.39  199.53  -61.39 
1 1 1   13    3   34 0.00  173.94   81.96  147.42   81.96   59.32 -109.44  251.79 -109.44 
1 1 1   13    3   35 0.00  412.46   54.94  391.08   54.94  349.60   41.32   16.37   41.32 
1 1 1   13    3   36 0.00  100.02   72.82  151.88   72.82   62.21  178.78  221.74  178.78 
1 1 1   13    3   37 0.00  188.00   82.40  155.59   82.40   78.90  -74.87  135.50  105.13 
1 1 1   13    3   38 0.00  260.52   84.46  207.79   84.46  250.97   99.39   27.64   99.39 
1 1 1   13    3   39 0.00  171.73   77.66  113.84   77.66   21.70 -125.23  136.00   54.77 
1 1 1   13    3   40 0.00  137.12   85.18  241.55   85.18  159.97 -166.16   23.42 -166.16 
1 1 1   13    3   41 0.00  129.45   79.88  176.68   79.88   64.36  148.28   22.78  -31.72 
1 1 1   13    3   42 0.00  116.68   70.19  105.60   70.19    6.06 -177.25  115.48 -177.25 
1 1 1   13    3   43 0.00   94.38   65.13  112.09   65.13   15.47   63.63   99.46 -116.37 
1 1 1   13    3   44 0.00   96.90   57.62   84.01   57.62    1.24   57.36   72.16 -122.64 
1 1 1   13    3   45 0.00   81.42   52.74   84.53   52.74   49.88   93.28  254.46   93.28 
1 1 1   13    4    1 0.00 3157.84   34.62 3172.71   34.62 1725.44  -13.63   39.40  166.37 
1 1 1   13    4    2 0.00  633.60   18.44  644.85   18.44  173.36  136.30  297.82  -43.70 
1 1 1   13    4    3 0.00 3231.61   20.70 3218.10   20.70 1995.88   -7.41  356.16   -7.41 
1 1 1   13    4    4 0.00 1404.81   19.14 1374.94   19.14  866.17   69.78  199.49   69.78 
1 1 1   13    4    5 0.00  752.09   18.18  777.03   18.18  255.32   95.12  305.72  -84.88 
1 1 1   13    4    6 0.00 1320.49   17.82 1311.01   17.82  618.09    6.67  234.98 -173.33 
1 1 1   13    4    7 0.00 1039.20   17.09 1042.40   17.09  712.55   17.93  301.81   17.93 
1 1 1   13    4    8 0.00 1543.32   18.75 1525.09   18.75  944.81  156.10  134.21  156.10 
1 1 1   13    4    9 0.00  651.62   18.97  674.89   18.97  366.27 -156.64   22.16 -156.64 
1 1 1   13    4   10 0.00 1570.62   18.64 1582.17   18.64 1039.60   51.98  242.25   51.98 
1 1 1   13    4   11 0.00  336.38   20.22  330.38   20.22   45.76 -140.66  220.09   39.34 
1 1 1   13    4   12 0.00  751.80   18.10  739.02   18.10  517.27   47.67  129.10   47.67 
1 1 1   13    4   13 0.00  730.53   19.53  721.09   19.53  427.46   79.90   48.45 -100.10 
1 1 1   13    4   14 0.00  499.63   24.12  408.04   24.12  286.52    5.17  114.23    5.17 
1 1 1   13    4   15 0.00  631.66   21.40  642.49   21.40  340.02  157.76  138.76  -22.24 
1 1 1   13    4   16 0.00  619.00   23.25  614.44   23.25  454.26  -43.04  159.16  -43.04 
1 1 1   13    4   17 0.00  315.82   31.73  352.21   31.73  105.42  -18.07  129.98  161.93 
1 1 1   13    4   18 0.00  406.60   26.70  486.65   26.70  150.31   16.25  257.09 -163.75 
1 1 1   13    4   19 0.00  861.61   20.04  839.30   20.04  485.13  -74.90  184.59  105.10 
1 1 1   13    4   20 0.00 1022.66   20.16 1000.62   20.16  970.86 -157.99  565.07 -157.99 
1 1 1   13    4   21 0.00 1460.23   17.10 1489.72   17.10 1026.25 -144.73   51.28   35.27 
1 1 1   13    4   22 0.00  876.76   19.99  929.23   19.99  694.40 -157.42  153.95 -157.42 
1 1 1   13    4   23 0.00 1675.94   16.46 1710.90   16.46 1295.83   60.67  176.34   60.67 
1 1 1   13    4   24 0.00  646.97   22.38  694.27   22.38  522.08  131.95  123.99  131.95 
1 1 1   13    4   25 0.00 1314.39   17.94 1384.38   17.94 1114.42  -74.88  245.21  -74.88 
1 1 1   13    4   26 0.00  411.75   35.21  414.96   35.21  282.93   30.73   64.17   30.73 
1 1 1   13    4   27 0.00  164.47   69.29  150.25   69.29  133.69  170.57  393.88  170.57 
1 1 1   13    4   28 0.00  386.09   39.19  366.96   39.19  229.51  -39.55   69.20  -39.55 
1 1 1   13    4   29 0.00  431.91   38.41  428.97   38.41  195.59  137.53  241.03  -42.47 
1 1 1   13    4   30 0.00  209.46   71.56  152.14   71.56   79.34  157.97  322.51  157.97 
1 1 1   13    4   31 0.00  584.45   31.97  551.56   31.97  459.21  141.96    7.23  141.96 
1 1 1   13    4   32 1.00  327.15   48.40  387.31   48.40  263.29   43.25   21.75   43.25 
1 1 1   13    4   33 0.00  576.74   31.51  670.49   31.51  454.76  -11.89  176.83  168.11 
1 1 1   13    4   34 0.00  376.06   51.62  379.05   51.62  325.52 -100.05   82.58 -100.05 
1 1 1   13    4   35 0.00  482.38   58.41  299.96   58.41  240.29  -78.01  210.41  101.99 
1 1 1   13    4   36 0.00  154.12   74.40  122.07   74.40   21.66  132.49  110.62  132.49 
1 1 1   13    4   37 0.00  112.08   63.99   96.00   63.99   35.80   44.17  144.55   44.17 
1 1 1   13    4   38 0.00  154.05   83.05  239.18   83.05  148.77  141.58   14.88  141.58 
1 1 1   13    4   39 0.00  102.16   78.03  182.15   78.03   22.34   51.31  148.13 -128.69 
1 1 1   13    4   40 0.00   85.04   60.40  101.86   60.40   40.34  -37.60  139.61  -37.60 
1 1 1   13    4   41 0.00  129.00   73.07  122.04   73.07   12.19   84.01   53.07  -95.99 
1 1 1   13    4   42 0.00  112.29   71.43  117.99   71.43    2.49  -68.45   72.70  111.55 
1 1 1   13    4   43 0.00  108.62   69.72  119.66   69.72   33.73 -159.37   46.61   20.63 
1 1 1   13    4   44 0.00   97.73   59.72   92.51   59.72    9.65   73.22  215.24   73.22 
1 1 1   13    4   45 0.00   82.40   52.68   83.40   52.68   43.32   -1.11  230.60   -1.11 
1 1 1   13    5    1 0.00 1504.72   20.92 1524.45   20.92  835.33  177.91    0.75  177.91 
1 1 1   13    5    2 0.00 2239.72   22.34 2212.20   22.34 1116.97  -59.89  248.91  120.11 
1 1 1   13    5    3 0.00 1366.82   19.06 1382.31   19.06  765.96 -120.06   23.31 -120.06 
1 1 1   13    5    4 0.00 1858.12   18.76 1856.12   18.76 1048.70 -100.80   28.55 -100.80 
1 1 1   13    5    5 0.00 3206.03   11.90 3202.17   11.90 1891.98  -17.94  165.74  -17.94 
1 1 1   13    5    6 0.00 2815.59   14.73 2870.79   14.73 1729.99   -7.59  234.79   -7.59 
1 1 1   13    5    7 0.00  973.08   17.71  977.42   17.71  647.06   46.34  223.96   46.34 
1 1 1   13    5    8 0.00  432.84   18.32  459.95   18.32  168.78  112.58   83.16  -67.42 
1 1 1   13    5    9 1.00 1166.76   19.00 1160.95   19.00  769.64   13.13  217.59   13.13 
1 1 1   13    5   10 0.00 1052.38   19.25 1025.40   19.25  568.23  161.45  161.95  -18.55 
1 1 1   13    5   11 0.00 1665.56   18.67 1611.65   18.67 1134.24   -4.20  168.20   -4.20 
1 1 1   13    5   12 0.00  711.64   19.52  713.91   19.52  464.96 -120.15   65.59 -120.15 
1 1 1   13    5   13 0.00  917.35   20.31  891.54   20.31  467.84  -23.78  224.98  156.22 
1 1 1   13    5   14 0.00 1159.84   19.61 1188.84   19.61  733.45  -22.11   85.81  157.89 
1 1 1   13    5   15 1.00  601.76   23.16  614.21   23.16  476.00   62.97  217.64   62.97 
1 1 1   13    5   16 0.00 1504.25   21.39 1548.10   21.39 1036.07   82.85   43.50   82.85 
1 1 1   13    5   17 0.00  472.97   22.99  534.49   22.99  358.12   63.04  146.44   63.04 
1 1 1   13    5   18 0.00  385.90   28.40  359.49   28.40  170.07 -111.29   60.74   68.71 
1 1 1   13    5   19 0.00 1147.07   18.37 1215.12   18.37  774.41 -175.16   78.47    4.84 
1 1 1   13    5   20 0.00  974.99   20.10  967.07   20.10  557.20  148.87  236.06  -31.13 
1 1 1   13    5   21 0.00 1228.93   17.82 1285.94   17.82  955.90  142.94  125.66  142.94 
1 1 1   13    5   22 0.00 1178.97   18.09 1265.90   18.09  856.88   61.46    7.98   61.46 
1 1 1   13    5   23 0.00 1144.88   18.91 1174.94   18.91  745.52   61.37  154.65 -118.63 
1 1 1   13    5   24 0.00 1173.05   18.63 1171.36   18.63  769.36 -140.59  155.23   39.41 
1 1 1   13    5   25 0.00  591.30   25.79  597.84   25.79  463.06  -59.85  111.08  -59.85 
1 1 1   13    5   26 0.00  190.17   57.31  272.62   57.31   11.15  -25.08  180.06  154.92 
1 1 1   13    5   27 0.00  415.02   35.70  441.32   35.70  257.78  -98.11   60.55   81.89 
1 1 1   13    5   28 0.00  159.09   68.48  198.31   68.48   43.78  163.71  187.33  163.71 
1 1 1   13    5   29 0.00  366.69   40.35  380.98   40.35  240.21  104.45   60.37  104.45 
1 1 1   13    5   30 0.00  678.44   27.87  671.94   27.87  519.55   -5.10   37.13  174.90 
1 1 1   13    5   31 0.00  121.18   65.14  305.44   65.14   27.95   49.45  148.06 -130.55 
1 1 1   13    5   32 0.00 1003.29   23.89 1023.84   23.89  815.35  -46.28  130.96  133.72 
1 1 1   13    5   33 0.00  340.15   49.67  395.87   49.67  293.55  165.74   40.17  165.74 
1 1 1   13    5   34 0.00  712.46   30.19  672.18   30.19  667.87 -108.57   86.15 -108.57 
1 1 1   13    5   35 0.00  191.44   77.20  244.18   77.20    0.48   71.60  313.97 -108.40 
1 1 1   13    5   36 0.00  358.86   70.87  247.75   70.87  236.79  128.80   73.04  -51.20 
1 1 1   13    5   37 0.00  245.86   82.79  179.16   82.79  192.50  105.75   16.66  105.75 
1 1 1   13    5   38 0.00  106.62   76.90  180.69   76.90   10.47 -115.95  281.37 -115.95 
1 1 1   13    5   39 1.00   81.19   61.06  109.06   61.06   36.62   28.74  120.54   28.74 
1 1 1   13    5   40 1.00  178.32   79.37  118.83   79.37   56.64  -87.55   88.99   92.45 
1 1 1   13    5   41 0.00  104.20   59.98   80.33   59.98   42.98  105.71  163.88  105.71 
1 1 1   13    5   42 0.00  109.45   68.48  108.70   68.48    2.06   97.38   37.65   97.38 
1 1 1   13    5   43 0.00   97.16   59.39   88.15   59.39   17.63  -12.44  173.78  -12.44 
1 1 1   13    5   44 0.00   85.36   53.77   81.88   53.77   10.45 -118.42   81.35 -118.42 
1 1 1   13    6    1 0.00 1125.81   17.78 1119.01   17.78  686.30  -67.59  175.42  -67.59 
1 1 1   13    6    2 0.00  744.57   15.72  740.93   15.72  360.50 -148.60   33.00   31.40 
1 1 1   13    6    3 0.00  921.10   17.59  924.01   17.59  453.77 -141.90   69.77   38.10 
1 1 1   13    6    4 0.00 1153.04   17.11 1176.55   17.11  565.30  -81.28  137.61   98.72 
1 1 1   13    6    5 0.00 1810.65   17.86 1888.74   17.86  986.45  -35.27   90.99  144.73 
1 1 1   13    6    6 0.00 1923.22   17.80 1903.80   17.80 1095.88  -54.53   33.67  -54.53 
1 1 1   13    6    7 0.00  535.17   19.22  535.74   19.22  298.25 -102.30  140.46 -102.30 
1 1 1   13    6    8 0.00 1240.35   18.65 1232.30   18.65  892.43  -36.14  398.20  -36.14 
1 1 1   13    6    9 0.00  374.44   19.03  387.61   19.03  118.80  100.32   56.11  -79.68 
1 1 1   13    6   10 0.00 1789.33   18.48 1782.84   18.48 1453.24   24.16  646.83   24.16 
1 1 1   13    6   11 0.00  333.98   29.48  269.03   29.48   23.52   78.05  196.04 -101.95 
1 1 1   13    6   12 0.00  436.50   25.59  462.07   25.59  164.24 -124.90  170.24   55.10 
1 1 1   13    6   13 0.00  711.82   20.54  703.28   20.54  482.88 -116.30   81.10 -116.30 
1 1 1   13    6   14 0.00  711.43   20.59  746.92   20.59  553.50   65.67  188.92   65.67 
1 1 1   13    6   15 0.00 1562.01   18.33 1599.96   18.33 1141.83   63.84  152.78   63.84 
1 1 1   13    6   16 0.00  539.05   22.29  573.89   22.29  297.15  -35.51   94.84  144.49 
1 1 1   13    6   17 0.00  463.77   24.66  463.28   24.66  254.45    4.19   42.62 -175.81 
1 1 1   13    6   18 0.00 1271.32   18.56 1349.75   18.56  733.74  133.99  321.74  -46.01 
1 1 1   13    6   19 0.00 1006.68   18.71  997.77   18.71  576.85  150.29  221.87  -29.71 
1 1 1   13    6   20 0.00  858.93   20.22  874.87   20.22  453.32  107.18  294.71  -72.82 
1 1 1   13    6   21 0.00  823.80   20.44  848.36   20.44  739.38  -87.92  332.37  -87.92 
1 1 1   13    6   22 0.00  835.58   20.44  874.45   20.44  601.83   -3.32   31.24   -3.32 
1 1 1   13    6   23 0.00  385.16   31.66  411.39   31.66  193.52   27.66   96.65   27.66 
1 1 1   13    6   24 0.00 1464.80   19.32 1492.26   19.32 1160.04  -87.45  172.25  -87.45 
1 1 1   13    6   25 0.00  643.29   24.64  691.93   24.64  592.97  -88.56  265.99  -88.56 
1 1 1   13    6   26 0.00  497.93   29.99  522.78   29.99  403.31 -142.36  119.86 -142.36 
1 1 1   13    6   27 0.00  416.56   33.58  493.77   33.58  227.00  -36.52  188.17  143.48 
1 1 1   13    6   28 0.00  655.25   25.47  739.29   25.47  751.00  -29.82  510.60  -29.82 
1 1 1   13    6   29 0.00  315.55   47.32  352.40   47.32  167.04  -51.35   69.36  128.65 
1 1 1   13    6   30 0.00  383.84   50.74  303.98   50.74  198.69  -51.58   26.87  128.42 
1 1 1   13    6   31 0.00  994.60   23.02 1018.84   23.02  911.10  -98.02  124.14  -98.02 
1 1 1   13    6   32 0.00  125.37   72.31  213.95   72.31   26.58  -83.28  175.35  -83.28 
1 1 1   13    6   33 0.00  644.99   32.18  599.92   32.18  613.64 -120.23  152.91 -120.23 
1 1 1   13    6   34 0.00  130.15   71.79  147.96   71.79   99.11 -144.53  307.81 -144.53 
1 1 1   13    6   35 0.00  676.58   29.61  753.86   29.61  665.56   83.30   23.45  -96.70 
1 1 1   13    6   36 0.00  267.42   74.24  258.74   74.24   43.10  -47.46  401.99  132.54 
1 1 1   13    6   37 0.00  154.93   82.82  192.82   82.82   88.07   35.93  121.73 -144.07 
1 1 1   13    6   38 0.00  141.18   77.14  136.28   77.14   16.38   60.80   83.79 -119.20 
1 1 1   13    6   39 0.00  127.59   64.73   75.00   64.73   77.86  109.89  275.61  109.89 
1 1 1   13    6   40 0.00  174.74   83.26  275.31   83.26  249.77 -125.05   49.81   54.95 
1 1 1   13    6   41 0.00  152.12   86.72  220.37   86.72   89.99   75.25   36.60   75.25 
1 1 1   13    6   42 0.00  122.23   72.30  111.17   72.30    3.63   87.58  116.83  -92.42 
1 1 1   13    6   43 0.00   96.61   62.28  101.19   62.28    6.09  -18.07   87.33  161.93 
1 1 1   13    6   44 0.00   89.19   57.51   92.73   57.51    2.44  -46.28  114.87  -46.28 
1 1 1   13    7    1 0.00  727.43   15.23  733.88   15.23  446.57  148.06  276.05  148.06 
1 1 1   13    7    2 0.00 1393.71   16.53 1388.47   16.53  837.65   30.25  171.55   30.25 
1 1 1   13    7    3 0.00  932.41   15.99  936.35   15.99  584.57 -173.83  205.04 -173.83 
1 1 1   13    7    4 0.00 2268.87   15.65 2219.02   15.65 1288.95 -133.54   88.18 -133.54 
1 1 1   13    7    5 0.00 1810.71   17.53 1776.92   17.53 1051.94 -102.28  104.06 -102.28 
1 1 1   13    7    6 0.00 2323.80   18.84 2248.67   18.84 1269.22 -101.96   40.45   78.04 
1 1 1   13    7    7 0.00  918.90   18.77  948.07   18.77  658.49  -85.65  310.80  -85.65 
1 1 1   13    7    8 0.00 1409.27   21.33 1444.84   21.33  724.43   26.21  175.33 -153.79 
1 1 1   13    7    9 0.00  513.58   18.64  510.82   18.64  244.64  -23.11   71.78  156.89 
1 1 1   13    7   10 0.00 1201.25   19.05 1213.50   19.05  725.54  168.24   62.79  -11.76 
1 1 1   13    7   11 0.00 1816.50   21.81 1797.76   21.81 1207.09  -41.24   96.15  -41.24 
1 1 1   13    7   12 0.00  551.62   23.07  547.05   23.07  262.63 -152.94  118.37   27.06 
1 1 1   13    7   13 0.00  921.27   19.70  941.52   19.70  780.03   56.57  378.60   56.57 
1 1 1   13    7   14 0.00 1034.31   18.10 1057.00   18.10  842.24   17.98  322.08   17.98 
1 1 1   13    7   15 0.00 1060.13   21.84 1126.11   21.84  743.78  -88.76   70.67  -88.76 
1 1 1   13    7   16 0.00  684.43   20.44  709.73   20.44  449.80  -39.10   15.39  -39.10 
1 1 1   13    7   17 0.00 1370.51   19.33 1415.69   19.33  987.90  130.33  103.45  130.33 
1 1 1   13    7   18 0.00  825.23   21.04  955.91   21.04  471.01 -141.98  256.71   38.02 
1 1 1   13    7   19 0.00  260.10   39.19  205.20   39.19    0.11 -124.49  163.56 -124.49 
1 1 1   13    7   20 0.00  765.23   20.16  796.87   20.16  605.00 -108.63  152.66 -108.63 
1 1 1   13    7   21 0.00  265.29   38.25  274.91   38.25   46.18   22.51   71.09 -157.49 
1 1 1   13    7   22 1.00  655.20   23.14  660.29   23.14  385.89  -25.66  114.69  154.34 
1 1 1   13    7   23 0.00  916.17   21.78  950.21   21.78  696.26 -167.45   84.68 -167.45 
1 1 1   13    7   24 0.00  389.93   30.77  391.67   30.77   93.74  -81.62  326.23   98.38 
1 1 1   13    7   25 0.00  481.34   30.59  546.22   30.59  421.88 -179.18  180.20 -179.18 
1 1 1   13    7   26 0.00  161.07   54.00  335.28   54.00   35.75  -28.89  170.69  151.11 
1 1 1   13    7   27 1.00  594.05   28.25  575.49   28.25  520.59  -18.94  223.91  -18.94 
1 1 1   13    7   28 0.00  704.37   25.18  720.75   25.18  693.76  -24.71  324.42  -24.71 
1 1 1   13    7   29 0.00  273.66   58.17  219.42   58.17    1.25 -176.15  286.35    3.85 
1 1 1   13    7   30 0.00  220.86   68.00  135.10   68.00   63.80  136.44  273.83  136.44 
1 1 1   13    7   31 0.00  491.94   38.70  464.71   38.70  399.81   68.69   58.96   68.69 
1 1 1   13    7   32 1.00  553.29   34.51  567.80   34.51  559.05 -161.97  201.61 -161.97 
1 1 1   13    7   33 0.00  354.90   49.57  350.59   49.57  156.12   39.66  261.89 -140.34 
1 1 1   13    7   34 0.00  136.70   69.99  118.79   69.99  178.98 -118.85  496.30 -118.85 
1 1 1   13    7   35 0.00   76.57   58.35  105.07   58.35   73.45   87.99  183.65   87.99 
1 1 1   13    7   36 0.00  208.35   79.25  100.32   79.25    7.81  142.38  266.33  142.38 
1 1 1   13    7   37 0.00  177.92   81.96  205.23   81.96  100.09  177.54   16.00  177.54 
1 1 1   13    7   38 0.00  182.32   86.29  251.22   86.29  203.58  -91.17   29.07  -91.17 
1 1 1   13    7   39 0.00  130.83   72.47  117.39   72.47   45.53   -0.77  278.76   -0.77 
1 1 1   13    7   40 0.00  115.68   68.39  114.33   68.39    5.66    7.76   63.86    7.76 
1 1 1   13    7   41 0.00  109.66   63.04   94.96   63.04   49.61 -107.76  237.41 -107.76 
1 1 1   13    7   42 0.00  117.78   71.84  117.28   71.84   23.09  -54.15  132.71  125.85 
1 1 1   13    7   43 0.00   94.32   58.83   89.88   58.83    4.23 -155.14   76.35 -155.14 
1 1 1   13    7   44 0.00   89.31   57.32   92.22   57.32    5.98  -76.88  141.15  -76.88 
1 1 1   13    8    1 0.00 2386.08   13.31 2398.29   13.31 1282.98   -5.37   53.50  174.63 
1 1 1   13    8    2 0.00 1533.91   16.84 1551.51   16.84  993.12  119.66  321.72  119.66 
1 1 1   13    8    3 0.00 2446.64   16.00 2425.88   16.00 1371.35 -158.25   52.49 -158.25 
1 1 1   13    8    4 0.00 2281.71   16.58 2313.65   16.58 1381.83  166.52  216.38  166.52 
1 1 1   13    8    5 0.00  933.14   16.72  926.28   16.72  441.96  135.13  124.17  -44.87 
1 1 1   13    8    6 0.00 1402.42   16.67 1383.78   16.67  879.76 -136.72  213.84 -136.72 
1 1 1   13    8    7 0.00 1150.17   17.40 1142.67   17.40  683.49  147.21   94.09  147.21 
1 1 1   13    8    8 0.00  536.08   19.96  513.83   19.96  203.98  -32.20  180.32  147.80 
1 1 1   13    8    9 0.00  511.84   21.28  524.33   21.28  289.38 -149.52   37.02 -149.52 
1 1 1   13    8   10 0.00 1453.31   20.17 1433.26   20.17 1045.75  -71.18  279.35  -71.18 
1 1 1   13    8   11 0.00  773.62   19.93  777.83   19.93  369.92   77.37  217.33 -102.63 
1 1 1   13    8   12 0.00  306.57   33.00  310.22   33.00   51.29   67.50  448.57   67.50 
1 1 1   13    8   13 0.00  952.30   21.39  916.39   21.39  728.82   40.30  266.51   40.30 
1 1 1   13    8   14 0.00  481.57   20.24  524.14   20.24  276.28  -33.00   50.75  147.00 
1 1 1   13    8   15 0.00  453.22   21.50  518.18   21.50  309.18 -123.97   78.81 -123.97 
1 1 1   13    8   16 0.00  730.16   21.03  773.20   21.03  487.24  118.35   11.72  118.35 
1 1 1   13    8   17 0.00  651.38   21.29  702.79   21.29  434.28 -101.24    0.71   78.76 
1 1 1   13    8   18 0.00  106.28   44.51   63.41   44.51   79.69  164.89  174.61  164.89 
1 1 1   13    8   19 0.00 1034.29   18.15 1129.88   18.15  799.01  136.39  117.04  136.39 
1 1 1   13    8   20 0.00  112.93   49.65  198.40   49.65   53.74   75.99  167.79   75.99 
1 1 1   13    8   21 0.00  875.52   20.47  853.16   20.47  629.93   21.89   96.28   21.89 
1 1 1   13    8   22 0.00  955.43   21.07  940.42   21.07  568.62  -34.83  175.99  145.17 
1 1 1   13    8   23 0.00  145.66   54.43  221.85   54.43   50.12 -123.52  218.35 -123.52 
1 1 1   13    8   24 1.00  739.98   22.95  812.99   22.95  353.05   -5.72  402.32  174.28 
1 1 1   13    8   25 0.00  715.78   24.19  722.07   24.19  420.75   80.15  195.93  -99.85 
1 1 1   13    8   26 0.00  440.55   31.54  485.89   31.54  240.73  -28.04  162.16  151.96 
1 1 1   13    8   27 0.00  491.93   30.38  526.00   30.38  369.17  -66.97   26.82  -66.97 
1 1 1   13    8   28 0.00  758.68   23.68  786.93   23.68  615.50  156.88   44.16  156.88 
1 1 1   13    8   29 0.00  265.47   52.37  305.53   52.37  100.22   52.42   99.98 -127.58 
1 1 1   13    8   30 0.00  697.60   27.77  701.06   27.77  636.49   41.41  153.57   41.41 
1 1 1   13    8   31 0.00  403.57   40.22  438.31   40.22  320.29 -160.99    1.51   19.01 
1 1 1   13    8   32 0.00  236.96   71.49  230.18   71.49   57.14   37.05   57.93 -142.95 
1 1 1   13    8   33 0.00  109.27   73.28  176.04   73.28    9.47  -31.06   35.72  -31.06 
1 1 1   13    8   34 0.00  371.31   52.53  335.74   52.53  215.49  -96.11  159.16   83.89 
1 1 1   13    8   35 0.00  318.27   61.85  299.80   61.85  240.02  -31.54   25.39  148.46 
1 1 1   13    8   36 0.00  326.76   57.70  387.18   57.70  517.39  -45.25  321.38  -45.25 
1 1 1   13    8   37 0.00  152.92   80.05  253.49   80.05  146.58  -93.05   42.93  -93.05 
1 1 1   13    8   38 0.00  264.64   63.52  433.06   63.52  453.68   83.78   42.36   83.78 
1 1 1   13    8   39 0.00  156.57   80.33  147.80   80.33   28.69  119.20   43.43  -60.80 
1 1 1   13    8   40 0.00  136.45   73.60  124.15   73.60   24.43   47.56   81.48 -132.44 
1 1 1   13    8   41 0.00  110.08   64.75  102.95   64.75   12.10  103.63   97.68  103.63 
1 1 1   13    8   42 0.00  114.52   70.05  111.12   70.05   13.31    9.08   90.79 -170.92 
1 1 1   13    8   43 1.00  102.57   63.97  101.34   63.97   25.59    7.59   93.40 -172.41 
1 1 1   13    8   44 0.00   95.06   60.95  100.49   60.95   13.63 -108.27  117.22   71.73 
1 1 1   13    9    1 1.00 1142.40   14.80 1109.62   14.80  552.84  154.58  100.44  -25.42 
1 1 1   13    9    2 0.00 2494.33   13.03 2482.52   13.03 1456.30  166.11  188.35  166.11 
1 1 1   13    9    3 0.00  969.74   15.77  950.89   15.77  475.95   63.68   73.83 -116.32 
1 1 1   13    9    4 0.00 2189.92   16.77 2112.02   16.77 1090.93   79.24  194.59 -100.76 
1 1 1   13    9    5 1.00 1870.43   17.34 1792.03   17.34  923.26   66.43  185.60 -113.57 
1 1 1   13    9    6 0.00 1449.57   17.52 1453.84   17.52  791.84  119.70   29.57  -60.30 
1 1 1   13    9    7 0.00 1484.31   18.60 1549.07   18.60  943.45 -170.06   36.81 -170.06 
1 1 1   13    9    8 0.00  737.30   17.56  768.86   17.56  515.65   10.10  164.29   10.10 
1 1 1   13    9    9 0.00  174.38   32.09  235.48   32.09   86.36  109.28  295.20  109.28 
1 1 1   13    9   10 0.00 1159.19   20.73 1140.10   20.73  467.96   97.38  504.67  -82.62 
1 1 1   13    9   11 0.00  336.88   29.20  312.50   29.20    7.05 -151.36  304.63   28.64 
1 1 1   13    9   12 0.00  824.56   21.09  854.98   21.09  606.46  -90.54  163.84  -90.54 
1 1 1   13    9   13 0.00  278.55   37.42  245.31   37.42    0.98 -103.46  240.53 -103.46 
1 1 1   13    9   14 0.00  242.36   45.72  125.04   45.72   90.03  125.21  314.77  125.21 
1 1 1   13    9   15 0.00  729.66   22.56  715.34   22.56  446.59 -123.28   14.01   56.72 
1 1 1   13    9   16 0.00  880.90   21.52  933.86   21.52  413.12  -96.33  361.25   83.67 
1 1 1   13    9   17 0.00  676.38   21.83  703.69   21.83  455.93  143.07   27.31  143.07 
1 1 1   13    9   18 0.00  823.49   21.65  833.25   21.65  638.24  105.39  186.36  105.39 
1 1 1   13    9   19 0.00  977.29   22.62  987.23   22.62  714.71   82.25   94.05   82.25 
1 1 1   13    9   20 0.00 1685.38   18.67 1714.56   18.67 1237.28  -17.99   82.54  -17.99 
1 1 1   13    9   21 0.00  595.81   25.13  563.15   25.13  356.04 -130.00   36.41   50.00 
1 1 1   13    9   22 0.00  147.62   54.53  179.09   54.53   18.19  107.03   62.34  107.03 
1 1 1   13    9   23 0.00  244.87   46.79  218.26   46.79   11.05  -83.78   47.66   96.22 
1 1 1   13    9   24 0.00  299.41   35.28  378.15   35.28  139.90 -130.35  101.07   49.65 
1 1 1   13    9   25 0.00 1327.00   19.82 1375.28   19.82  943.77 -124.88  109.45   55.12 
1 1 1   13    9   26 0.00 1301.01   18.62 1276.68   18.62  910.30 -105.88  119.56   74.12 
1 1 1   13    9   27 0.00  713.38   22.52  795.24   22.52  489.89  121.39  152.85  -58.61 
1 1 1   13    9   28 0.00  250.49   45.73  363.06   45.73   75.48  -51.43  240.25  128.57 
1 1 1   13    9   29 0.00  780.37   23.48  839.50   23.48  723.41   16.31  174.00   16.31 
1 1 1   13    9   30 0.00  623.41   27.67  615.64   27.67  653.68  104.33  359.86  104.33 
1 1 1   13    9   31 0.00  262.50   58.93  261.95   58.93   43.55   29.88  274.24 -150.12 
1 1 1   13    9   32 0.00  532.21   34.32  566.26   34.32  356.30  176.89  213.70   -3.11 
1 1 1   13    9   33 0.00  253.00   59.82  364.97   59.82  169.40  129.06  110.40  -50.94 
1 1 1   13    9   34 0.00  169.41   74.28  135.02   74.28   16.64  143.86   84.98  143.86 
1 1 1   13    9   35 0.00  257.59   57.14  383.09   57.14  195.90 -176.66  164.68    3.34 
1 1 1   13    9   36 0.00  333.33   62.65  303.96   62.65  413.69  178.22  180.74  178.22 
1 1 1   13    9   37 0.00  140.08   76.94  162.71   76.94   31.82   24.71  170.42 -155.29 
1 1 1   13    9   38 0.00  170.76   77.73  130.53   77.73   16.87  146.28   26.04  -33.72 
1 1 1   13    9   39 0.00  104.62   62.61   95.32   62.61   15.47 -123.26   64.85 -123.26 
1 1 1   13    9   40 0.00  140.04   87.81  200.12   87.81  108.41   98.11  169.59  -81.89 
1 1 1   13    9   41 0.00  124.84   74.76  115.22   74.76    9.88 -145.64   89.32   34.36 
1 1 1   13    9   42 0.00  115.48   70.65  113.21   70.65   13.93 -148.78  147.12   31.22 
1 1 1   13    9   43 0.00   95.04   61.23   97.91   61.23   11.77 -112.75   80.90   67.25 
1 1 1   13    9   44 0.00   82.58   55.24   90.56   55.24    5.38 -149.54   62.81 -149.54 
1 1 1   13   10    1 0.00 1213.36   16.20 1267.27   16.20  772.54   44.31  226.40   44.31 
1 1 1   13   10    2 0.00 1035.69   15.97 1038.94   15.97  442.87   42.23  221.58 -137.77 
1 1 1   13   10    3 0.00 2671.63   13.85 2682.73   13.85 1586.42   96.78  239.62   96.78 
1 1 1   13   10    4 0.00  522.12   16.09  508.40   16.09  186.37 -105.41  132.04   74.59 
1 1 1   13   10    5 0.00 1060.17   17.25 1067.01   17.25  463.26  -99.70  231.14   80.30 
1 1 1   13   10    6 0.00 1229.61   18.30 1268.68   18.30  837.96  172.13  185.38  172.13 
1 1 1   13   10    7 0.00  320.32   21.95  352.11   21.95   47.55  -87.51  203.89   92.49 
1 1 1   13   10    8 0.00  833.45   17.38  839.85   17.38  560.61   64.30  139.42   64.30 
1 1 1   13   10    9 0.00  405.23   22.62  413.01   22.62  148.40  -14.94   97.55  165.06 
1 1 1   13   10   10 0.00  503.34   22.40  522.86   22.40  279.07  -67.00  151.57  -67.00 
1 1 1   13   10   11 0.00  478.33   22.23  452.04   22.23  185.71   -7.03  166.54  172.97 
1 1 1   13   10   12 0.00  648.98   23.16  665.32   23.16  446.70 -123.36   99.21 -123.36 
1 1 1   13   10   13 0.00  400.22   31.58  379.90   31.58  193.99   -1.57   24.35   -1.57 
1 1 1   13   10   14 0.00  477.50   31.06  532.31   31.06  186.51  -79.92  232.15  100.08 
1 1 1   13   10   15 0.00  648.71   23.13  682.68   23.13  450.69   37.13   81.85   37.13 
1 1 1   13   10   16 0.00 2311.16   18.29 2279.47   18.29 1686.20  114.29  322.34  114.29 
1 1 1   13   10   17 0.00 1545.66   19.33 1587.03   19.33 1061.81   91.37   23.53   91.37 
1 1 1   13   10   18 0.00 1069.65   19.48 1144.82   19.48  948.87  -29.72  419.40  -29.72 
1 1 1   13   10   19 0.00  504.76   28.07  452.88   28.07  283.19  -70.21   19.49  109.79 
1 1 1   13   10   20 0.00 1253.24   20.29 1262.81   20.29 1161.33  -74.14  646.01  -74.14 
1 1 1   13   10   21 0.00  892.67   20.76  883.45   20.76  586.74  161.62   23.51  -18.38 
1 1 1   13   10   22 0.00  687.98   21.69  719.11   21.69  358.89  -73.02  236.82  106.98 
1 1 1   13   10   23 0.00 1078.16   19.82 1120.17   19.82  799.39  165.10   50.51  165.10 
1 1 1   13   10   24 0.00  567.51   25.55  559.27   25.55  304.15 -112.49  166.85   67.51 
1 1 1   13   10   25 0.00  590.44   23.39  617.18   23.39  303.73 -136.90  249.66   43.10 
1 1 1   13   10   26 0.00 1030.59   19.83 1080.55   19.83  736.82   86.10  101.30  -93.90 
1 1 1   13   10   27 0.00  281.28   49.06  275.79   49.06   75.20   89.92   43.09  -90.08 
1 1 1   13   10   28 0.00  686.10   24.71  711.70   24.71  630.07   19.11  213.91   19.11 
1 1 1   13   10   29 0.00 1106.48   20.49 1099.20   20.49 1038.72   58.91  317.56   58.91 
1 1 1   13   10   30 0.00   76.57   60.23  132.17   60.23   74.54   93.83  183.46   93.83 
1 1 1   13   10   31 0.00  306.79   47.29  384.77   47.29  204.47  102.59   91.74  -77.41 
1 1 1   13   10   32 0.00  326.61   58.40  251.62   58.40  119.67  103.60  168.28  -76.40 
1 1 1   13   10   33 0.00   99.19   70.15  173.91   70.15   95.17  -38.38  297.44  -38.38 
1 1 1   13   10   34 0.00   86.36   73.55  229.31   73.55   31.16  -15.31  205.99  -15.31 
1 1 1   13   10   35 0.00  109.35   72.54  166.38   72.54   45.73  160.69  206.27  160.69 
1 1 1   13   10   36 0.00  542.26   36.86  558.61   36.86  864.23   22.55  428.23   22.55 
1 1 1   13   10   37 0.00   96.38   60.53   96.38   60.53  192.26 -100.88  541.89 -100.88 
1 1 1   13   10   38 0.00  351.88   68.43  248.08   68.43  329.43   93.34   70.10  -86.66 
1 1 1   13   10   39 0.00  142.67   77.05  155.17   77.05   51.46   97.76  109.36  -82.24 
1 1 1   13   10   40 0.00  129.22   80.59  185.59   80.59   94.81  169.06  111.95  -10.94 
1 1 1   13   10   41 0.00  105.97   67.27  104.59   67.27   15.22 -169.23  117.49 -169.23 
1 1 1   13   10   42 0.00  118.94   73.90  123.65   73.90   61.22 -159.01   65.51   20.99 
1 1 1   13   10   43 0.00  106.39   67.42  111.91   67.42   47.19   99.14   98.69  -80.86 
1 1 1   13   10   44 0.00   88.37   54.54   82.35   54.54    6.55  -52.12   61.75  -52.12 
1 1 1   13   11    1 0.00  632.82   14.76  640.57   14.76  236.74  -55.79  169.65  124.21 
1 1 1   13   11    2 0.00  292.67   19.49  274.65   19.49   13.06    1.68  126.46 -178.32 
1 1 1   13   11    3 0.00  664.70   15.23  644.89   15.23  232.12 -121.80  269.37   58.20 
1 1 1   13   11    4 0.00 1358.80   15.42 1373.90   15.42  949.97  -96.22  296.82  -96.22 
1 1 1   13   11    5 0.00 1616.69   15.30 1590.09   15.30 1123.65   99.81  340.00   99.81 
1 1 1   13   11    6 0.00  497.43   18.01  510.50   18.01  203.62   23.06  129.99 -156.94 
1 1 1   13   11    7 0.00  929.72   17.34  938.35   17.34  497.73   19.07  112.70 -160.93 
1 1 1   13   11    8 0.00  906.59   20.63  914.87   20.63  562.54   86.09   42.67   86.09 
1 1 1   13   11    9 0.00  692.05   21.52  685.41   21.52   83.54  -61.17  662.67  118.83 
1 1 1   13   11   10 0.00 1346.78   18.70 1347.82   18.70 1128.14  -52.77  583.70  -52.77 
1 1 1   13   11   11 0.00  588.48   20.85  562.13   20.85  389.49 -101.98  120.53 -101.98 
1 1 1   13   11   12 0.00  267.59   43.96  182.78   43.96    0.43   80.81   99.20  -99.19 
1 1 1   13   11   13 0.00  680.25   25.03  699.37   25.03  356.34  152.35  127.79  -27.65 
1 1 1   13   11   14 0.00 1149.43   23.58 1180.31   23.58  931.92  -26.47  391.26  -26.47 
1 1 1   13   11   15 0.00  935.79   25.57  925.08   25.57  701.91   25.63  225.71   25.63 
1 1 1   13   11   16 0.00  718.74   26.64  730.33   26.64  629.08  -79.31  384.31  -79.31 
1 1 1   13   11   17 0.00 1752.62   20.06 1737.66   20.06 1318.30  -12.88  303.22  -12.88 
1 1 1   13   11   18 0.00  825.48   21.97  813.88   21.97  508.24  -68.42   66.26  111.58 
1 1 1   13   11   19 0.00  355.63   31.30  336.48   31.30  118.04 -124.33  144.81   55.67 
1 1 1   13   11   20 0.00  868.87   20.37  887.03   20.37  682.19  176.90  214.49  176.90 
1 1 1   13   11   21 0.00 1048.35   20.90 1079.98   20.90  759.83 -130.73   79.29 -130.73 
1 1 1   13   11   22 0.00 1094.07   20.53 1080.82   20.53  655.48   17.72  193.00 -162.28 
1 1 1   13   11   23 0.00  442.21   26.87  429.73   26.87  240.42   35.01   61.65 -144.99 
1 1 1   13   11   24 0.00 1110.56   18.91 1099.30   18.91  753.61   87.27   76.24  -92.73 
1 1 1   13   11   25 0.00  752.81   21.61  728.10   21.61  589.08  132.10  132.13  132.10 
1 1 1   13   11   26 0.00  459.50   33.72  470.72   33.72  170.53  173.42  309.49   -6.58 
1 1 1   13   11   27 0.00  827.15   24.62  784.38   24.62  671.98  -27.13  142.86  -27.13 
1 1 1   13   11   28 0.00  723.30   27.35  745.37   27.35  622.24   13.94  133.47   13.94 
1 1 1   13   11   29 0.00  343.21   49.59  268.30   49.59  140.19 -178.16   26.70 -178.16 
1 1 1   13   11   30 0.00  789.46   23.90  847.78   23.90  713.98  -97.18  105.91  -97.18 
1 1 1   13   11   31 0.00  469.65   36.43  527.19   36.43  472.20   55.33  181.78   55.33 
1 1 1   13   11   32 0.00  622.50   32.55  528.37   32.55  590.33  177.13  244.49  177.13 
1 1 1   13   11   33 0.00  145.05   63.46  335.60   63.46   97.60   84.28   80.71  -95.72 
1 1 1   13   11   34 0.00  129.14   73.52  166.17   73.52    6.32   75.30   59.49   75.30 
1 1 1   13   11   35 0.00  124.34   69.56  140.18   69.56    6.37  128.54   75.98  128.54 
1 1 1   13   11   36 0.00  136.62   66.49   89.48   66.49    4.52  -40.18   34.89  -40.18 
1 1 1   13   11   37 0.00  119.53   75.28  209.86   75.28   48.94  -40.58  201.90  139.42 
1 1 1   13   11   38 1.00   81.92   60.98  110.74   60.98  100.31 -169.84  312.18 -169.84 
1 1 1   13   11   39 0.00  108.27   67.72  125.12   67.72   12.48  139.71  130.68  139.71 
1 1 1   13   11   40 0.00  133.56   66.17   85.75   66.17    6.53  -94.76  103.60  -94.76 
1 1 1   13   11   41 0.00  109.31   73.12  121.86   73.12    2.06  166.39   32.19  -13.61 
1 1 1   13   11   42 0.00   93.91   66.24  114.09   66.24   13.40 -149.43   52.33   30.57 
1 1 1   13   11   43 0.00  101.95   65.44  108.92   65.44   32.86   94.98  105.89  -85.02 
1 1 1   13   12    1 0.00 1815.86   14.59 1827.01   14.59 1190.62  -15.61  267.83  -15.61 
1 1 1   13   12    2 0.00  666.72   14.76  664.17   14.76  301.21   79.69  128.54 -100.31 
1 1 1   13   12    3 0.00   96.15   38.02   75.41   38.02   93.80   91.82  199.93   91.82 
1 1 1   13   12    4 0.00 1134.27   15.36 1153.05   15.36  762.92   74.14  201.81   74.14 
1 1 1   13   12    5 0.00  927.80   15.45  919.36   15.45  662.29  131.10  275.06  131.10 
1 1 1   13   12    6 0.00  609.56   17.51  617.34   17.51  329.42  -28.53   12.65  151.47 
1 1 1   13   12    7 0.00  763.54   18.22  781.70   18.22  594.46  -49.11  345.57  -49.11 
1 1 1   13   12    8 0.00 1445.19   17.28 1447.30   17.28 1003.10 -149.79  250.77 -149.79 
1 1 1   13   12    9 0.00 1123.83   19.92 1115.85   19.92  775.98  -79.65  185.50  -79.65 
1 1 1   13   12   10 0.00 1438.53   18.41 1477.39   18.41  930.87  160.22   42.16  160.22 
1 1 1   13   12   11 0.00  461.98   25.01  443.18   25.01  213.61 -162.80  131.12 -162.80 
1 1 1   13   12   12 0.00 2345.24   22.14 2341.62   22.14 1617.28  151.30  299.41  151.30 
1 1 1   13   12   13 0.00  483.39   29.94  500.99   29.94  227.39  -78.50  110.15  101.50 
1 1 1   13   12   14 0.00  653.07   30.59  559.90   30.59  404.76 -112.04   93.27 -112.04 
1 1 1   13   12   15 0.00  509.35   35.05  484.74   35.05  158.58 -122.10  285.18   57.90 
1 1 1   13   12   16 1.00  598.25   31.51  624.58   31.51  466.83 -178.94  209.63 -178.94 
1 1 1   13   12   17 0.00 1401.27   22.70 1395.60   22.70 1023.83 -159.41  195.12 -159.41 
1 1 1   13   12   18 0.00 1686.00   23.75 1706.93   23.75 1400.56 -115.83  514.63 -115.83 
1 1 1   13   12   19 0.00  532.74   30.34  524.97   30.34  261.33  -47.14  127.03  132.86 
1 1 1   13   12   20 0.00  553.38   28.13  573.87   28.13  405.91   71.14  127.58   71.14 
1 1 1   13   12   21 0.00 1320.61   20.10 1338.24   20.10  885.82   49.54   36.15 -130.46 
1 1 1   13   12   22 0.00  461.13   26.51  495.22   26.51  226.73   98.90  156.60  -81.10 
1 1 1   13   12   23 0.00  115.85   46.15   48.08   46.15  202.51  -69.43  447.14  -69.43 
1 1 1   13   12   24 0.00  701.78   21.26  728.50   21.26  432.38 -146.52  133.05   33.48 
1 1 1   13   12   25 1.00  378.94   31.58  349.86   31.58  152.05  -82.90  145.44   97.10 
1 1 1   13   12   26 0.00  241.81   47.67  226.36   47.67   21.10  -81.39   73.85   98.61 
1 1 1   13   12   27 0.00  489.23   30.44  485.97   30.44  410.18  -15.64  226.69  -15.64 
1 1 1   13   12   28 0.00  700.17   25.67  711.85   25.67  719.96 -170.85  411.64 -170.85 
1 1 1   13   12   29 1.00  675.98   27.69  644.48   27.69  461.06 -124.83  102.70   55.17 
1 1 1   13   12   30 0.00  210.38   69.55  197.61   69.55    6.86   47.71  167.29 -132.29 
1 1 1   13   12   31 0.00  893.55   23.44  934.09   23.44  822.64  111.43  123.35  111.43 
1 1 1   13   12   32 0.00  554.15   34.66  480.33   34.66  401.70 -114.89   43.50   65.11 
1 1 1   13   12   33 0.00  265.21   64.07  258.28   64.07   70.53   91.61  240.75  -88.39 
1 1 1   13   12   34 0.00  568.51   34.61  553.98   34.61  644.83  -44.50  306.37  -44.50 
1 1 1   13   12   35 0.00  129.31   69.08  112.60   69.08   18.48  127.19   95.53  127.19 
1 1 1   13   12   36 0.00  108.09   73.32  177.21   73.32    4.85  152.60  239.80  152.60 
1 1 1   13   12   37 0.00  274.05   57.09  390.10   57.09  408.55   14.82   48.77   14.82 
1 1 1   13   12   38 0.00  133.37   67.81  104.64   67.81   14.36 -100.01  114.52 -100.01 
1 1 1   13   12   39 0.00  153.18   72.08  111.61   72.08   29.92  127.29  111.54  -52.71 
1 1 1   13   12   40 0.00  155.72   68.50   77.08   68.50   25.12  -41.47  253.78  -41.47 
1 1 1   13   12   41 0.00  137.08   71.89  100.26   71.89   21.13 -156.89   49.88   23.11 
1 1 1   13   12   42 0.00   89.46   57.70   86.08   57.70   26.62   -8.46  165.22   -8.46 
1 1 1   13   12   43 0.00   93.00   57.35   87.30   57.35    1.62 -123.00   81.65 -123.00 
1 1 1   14    1    1 0.00 2791.45   30.98 2765.88   30.98 1488.86 -106.19  230.33   73.81 
1 1 1   14    1    2 0.00 1921.24   25.58 1926.46   25.58 1029.13   11.39  137.32 -168.61 
1 1 1   14    1    3 0.00 2521.61   31.01 2522.41   31.01 1349.98   25.95  182.55 -154.05 
1 1 1   14    1    4 0.00 3340.09   36.20 3356.35   36.20 2011.54  105.34  193.43  105.34 
1 1 1   14    1    5 0.00 1500.39   22.29 1514.27   22.29 1087.96  -47.53  495.97  -47.53 
1 1 1   14    1    6 0.00  689.82   17.40  695.91   17.40  249.12   97.09  233.52  -82.91 
1 1 1   14    1    7 0.00 1470.80   20.87 1500.52   20.87  710.94 -175.84  271.61    4.16 
1 1 1   14    1    8 0.00 1852.17   22.85 1843.65   22.85  995.27  153.17  133.96  -26.83 
1 1 1   14    1    9 0.00 1523.94   19.64 1513.95   19.64  874.52   32.57    1.51   32.57 
1 1 1   14    1   10 0.00  749.62   18.46  749.81   18.46  456.96  102.77   17.28  102.77 
1 1 1   14    1   11 0.00 1004.70   17.53  978.68   17.53  622.52  -67.34   11.73  -67.34 
1 1 1   14    1   12 0.00 1263.47   18.79 1254.52   18.79  812.57  103.30   23.37  103.30 
1 1 1   14    1   13 0.00  717.73   19.54  715.67   19.54  572.21   67.34  323.61   67.34 
1 1 1   14    1   14 0.00  434.50   21.50  427.40   21.50  204.12 -121.89   80.22   58.11 
1 1 1   14    1   15 0.00 1880.27   18.02 1895.82   18.02 1218.20   65.52   77.75 -114.48 
1 1 1   14    1   16 0.00 1041.57   26.02  973.28   26.02  658.36  -86.57   20.23  -86.57 
1 1 1   14    1   17 0.00  940.93   20.94  953.96   20.94  752.83   86.20  285.32   86.20 
1 1 1   14    1   18 0.00  852.02   22.82  883.80   22.82  617.19 -144.64  102.33 -144.64 
1 1 1   14    1   19 0.00 1093.12   18.43 1115.29   18.43  850.29  -75.41  221.51  -75.41 
1 1 1   14    1   20 0.00  526.11   22.55  539.39   22.55  323.72  -10.40   24.69  169.60 
1 1 1   14    1   21 0.00  330.85   30.75  378.73   30.75  152.48 -173.90   72.86    6.10 
1 1 1   14    1   22 0.00  538.20   24.41  530.62   24.41  211.81  -44.03  269.41  135.97 
1 1 1   14    1   23 0.00  771.09   20.49  779.95   20.49  700.94 -140.33  384.59 -140.33 
1 1 1   14    1   24 0.00 1200.58   18.49 1161.60   18.49  936.78   86.99  215.08   86.99 
1 1 1   14    1   25 0.00  276.83   42.13  311.38   42.13   79.77  103.63  139.50  -76.37 
1 1 1   14    1   26 0.00  862.19   21.30  892.18   21.30  598.59  128.65   70.05  -51.35 
1 1 1   14    1   27 0.00  313.24   44.87  318.70   44.87   90.93   80.96  196.53  -99.04 
1 1 1   14    1   28 0.00  457.55   35.69  403.82   35.69  220.75  -80.58  151.91   99.42 
1 1 1   14    1   29 0.00  239.52   59.04  285.03   59.04   58.42  128.75   69.94  -51.25 
1 1 1   14    1   30 0.00  586.44   32.18  587.28   32.18  519.83 -130.63  166.97 -130.63 
1 1 1   14    1   31 0.00  365.47   59.12  250.38   59.12  130.00 -155.45  149.81   24.55 
1 1 1   14    1   32 0.00  164.83   81.74  214.50   81.74   62.41  164.90  343.32  164.90 
1 1 1   14    1   33 0.00  450.15   45.68  432.97   45.68  431.27  -44.55  226.63  -44.55 
1 1 1   14    1   34 0.00  177.53   81.47  159.68   81.47   14.91 -146.41  101.26 -146.41 
1 1 1   14    1   35 0.00  242.91   72.78  338.51   72.78  179.26   72.81   34.42   72.81 
1 1 1   14    1   36 0.00  189.91   78.72  306.32   78.72  190.89   80.23   42.19   80.23 
1 1 1   14    1   37 0.00  149.75   88.03  224.37   88.03   91.25  -57.23  174.15  122.77 
1 1 1   14    1   38 0.00   80.50   70.60  145.08   70.60   96.38  -90.82  372.16  -90.82 
1 1 1   14    1   39 0.00  113.26   77.97  157.83   77.97    2.39  -52.52  193.47  -52.52 
1 1 1   14    1   40 0.00  148.57   80.39  147.51   80.39   42.47  -78.82   57.85  101.18 
1 1 1   14    1   41 0.00   90.60   63.62  117.12   63.62   50.99 -168.89  249.46 -168.89 
1 1 1   14    1   42 0.00  120.66   71.26  108.25   71.26    2.13    6.18  128.06    6.18 
1 1 1   14    1   43 1.00  105.76   64.16   97.73   64.16    6.56 -103.35  147.44   76.65 
1 1 1   14    1   44 0.00   91.94   57.03   87.96   57.03    0.92 -156.80   65.15 -156.80 
1 1 1   14    2    1 0.00 1172.31   23.61 1184.12   23.61  804.53  146.59  319.22  146.59 
1 1 1   14    2    2 0.00 1780.55   25.26 1758.36   25.26  820.38  105.63  358.06  -74.37 
1 1 1   14    2    3 0.00  678.54   19.52  691.96   19.52  280.61   98.01  147.63  -81.99 
1 1 1   14    2    4 0.00 2606.04   30.52 2620.02   30.52 1462.43  -73.12   35.85  106.88 
1 1 1   14    2    5 0.00 1355.88   22.00 1364.53   22.00  743.55   26.37   27.11 -153.63 
1 1 1   14    2    6 0.00 1822.60   21.73 1816.16   21.73 1080.31  145.90  108.18  145.90 
1 1 1   14    2    7 0.00 1494.94   19.46 1485.78   19.46  946.73   97.10  208.31   97.10 
1 1 1   14    2    8 0.00  908.47   18.72  887.82   18.72  487.83   92.72   20.13  -87.28 
1 1 1   14    2    9 1.00  771.97   16.76  766.37   16.76  457.93 -166.52   79.49 -166.52 
1 1 1   14    2   10 0.00 1246.09   19.02 1232.35   19.02  774.74  -89.45    2.30  -89.45 
1 1 1   14    2   11 0.00  988.05   17.25 1008.99   17.25  729.97  -18.42  228.61  -18.42 
1 1 1   14    2   12 0.00  703.79   17.79  708.33   17.79  483.25   52.45  128.93   52.45 
1 1 1   14    2   13 0.00  897.38   17.55  902.55   17.55  610.62   11.71   80.13   11.71 
1 1 1   14    2   14 0.00  902.37   18.47  936.00   18.47  594.12    2.63    5.46    2.63 
1 1 1   14    2   15 0.00  696.25   22.01  696.24   22.01  621.45 -103.75  456.31 -103.75 
1 1 1   14    2   16 0.00  716.52   24.49  722.90   24.49  424.94 -109.41   56.65   70.59 
1 1 1   14    2   17 0.00 1176.40   19.17 1154.60   19.17  694.70   66.93  146.30 -113.07 
1 1 1   14    2   18 0.00 1165.90   20.44 1209.29   20.44  919.64  -97.53  261.00  -97.53 
1 1 1   14    2   19 0.00 1589.55   18.09 1652.56   18.09 1220.39   60.57  233.35   60.57 
1 1 1   14    2   20 0.00  412.08   29.67  457.74   29.67  241.63   24.67   30.24 -155.33 
1 1 1   14    2   21 0.00  899.62   19.27  891.36   19.27  632.22  134.07   36.25  134.07 
1 1 1   14    2   22 0.00  886.45   19.69  873.69   19.69  633.32   99.66   84.28   99.66 
1 1 1   14    2   23 0.00  795.54   21.22  750.65   21.22  643.33  -59.02  254.72  -59.02 
1 1 1   14    2   24 0.00  326.93   35.64  373.86   35.64  161.25 -129.42   57.85   50.58 
1 1 1   14    2   25 0.00  517.17   27.73  527.14   27.73  289.29  -30.21  125.89  149.79 
1 1 1   14    2   26 0.00  732.12   22.68  731.20   22.68  552.33  -51.47   61.79  -51.47 
1 1 1   14    2   27 0.00  301.97   45.53  297.15   45.53   91.37  168.73  146.29  -11.27 
1 1 1   14    2   28 0.00  933.60   21.29  933.29   21.29  613.95   24.40  191.28 -155.60 
1 1 1   14    2   29 0.00  241.17   65.24  212.47   65.24   10.31   62.05  154.10 -117.95 
1 1 1   14    2   30 0.00  159.56   71.07  203.25   71.07   22.43  173.71  125.33  173.71 
1 1 1   14    2   31 0.00  341.52   46.52  440.04   46.52  254.24  -59.28   57.73  120.72 
1 1 1   14    2   32 0.00  187.40   78.06  168.16   78.06   31.92  -25.09  211.34  -25.09 
1 1 1   14    2   33 0.00  273.60   61.38  345.89   61.38   89.86  -12.08   40.98  -12.08 
1 1 1   14    2   34 0.00  220.06   75.07  264.88   75.07   23.31   -8.44  293.53  171.56 
1 1 1   14    2   35 0.00  136.43   79.74  162.30   79.74   43.04 -146.40  182.61 -146.40 
1 1 1   14    2   36 0.00  240.86   79.26  240.57   79.26  170.88  -97.71   45.07  -97.71 
1 1 1   14    2   37 0.00   91.21   74.46  160.19   74.46  101.73 -162.44  428.47 -162.44 
1 1 1   14    2   38 1.00  118.45   75.94  148.71   75.94   42.30  -62.15  312.94  -62.15 
1 1 1   14    2   39 1.00  161.09   83.22  179.10   83.22   48.75  -69.44   16.83  110.56 
1 1 1   14    2   40 1.00  123.45   74.89  135.81   74.89   10.91    7.81   84.33 -172.19 
1 1 1   14    2   41 0.00  144.32   79.36  154.65   79.36   73.30  164.44   64.47  -15.56 
1 1 1   14    2   42 0.00   94.63   57.62   79.84   57.62   66.93   28.48  224.98   28.48 
1 1 1   14    2   43 0.00   94.18   61.95  101.57   61.95    1.30   69.61   14.04 -110.39 
1 1 1   14    2   44 0.00   98.54   61.52   99.05   61.52    7.11 -178.58   28.05    1.42 
1 1 1   14    3    1 0.00 2115.35   28.20 2153.77   28.20 1279.69   70.26  158.25   70.26 
1 1 1   14    3    2 0.00 1538.93   24.27 1536.43   24.27  975.15  -79.54  247.33  -79.54 
1 1 1   14    3    3 0.00 2633.72   29.60 2636.02   29.60 1336.48  -42.22  293.44  137.78 
1 1 1   14    3    4 1.00 1123.20   20.44 1138.12   20.44  514.47   57.46  211.37 -122.54 
1 1 1   14    3    5 0.00 1670.30   20.93 1675.21   20.93  971.31   57.39   75.97   57.39 
1 1 1   14    3    6 0.00  601.99   17.68  540.92   17.68  173.45   58.63  253.86 -121.37 
1 1 1   14    3    7 0.00 1832.73   22.90 1837.77   22.90 1120.42   44.89  159.78   44.89 
1 1 1   14    3    8 0.00 1045.98   19.34 1019.69   19.34  727.21   75.11  316.13   75.11 
1 1 1   14    3    9 0.00  960.96   17.19  965.78   17.19  550.18   37.47   22.57   37.47 
1 1 1   14    3   10 0.00  707.62   16.99  678.64   16.99  270.23   80.51  295.54  -99.49 
1 1 1   14    3   11 0.00  631.65   17.19  623.30   17.19  419.52 -171.36  130.63 -171.36 
1 1 1   14    3   12 0.00  285.65   23.74  272.41   23.74  160.80  -40.51  617.09  -40.51 
1 1 1   14    3   13 0.00  753.67   18.31  769.66   18.31  570.44  -44.94  199.35  -44.94 
1 1 1   14    3   14 1.00  885.53   20.28  851.24   20.28  778.25 -115.59  477.53 -115.59 
1 1 1   14    3   15 0.00  610.97   22.13  614.37   22.13  412.36   97.37   68.64   97.37 
1 1 1   14    3   16 0.00  864.58   24.19  936.54   24.19  685.69   -3.47  226.19   -3.47 
1 1 1   14    3   17 0.00  375.38   27.36  427.28   27.36  207.76   -7.39    9.67  172.61 
1 1 1   14    3   18 0.00  475.93   25.60  518.37   25.60  334.66  -65.13   93.02  -65.13 
1 1 1   14    3   19 0.00  535.17   26.31  548.96   26.31  399.66   33.74  149.56   33.74 
1 1 1   14    3   20 0.00  441.60   29.38  404.71   29.38  129.14 -107.46  272.77   72.54 
1 1 1   14    3   21 0.00 1432.15   19.07 1443.33   19.07 1283.35   -2.92  557.47   -2.92 
1 1 1   14    3   22 0.00  408.20   29.51  399.84   29.51  232.05 -106.67   89.46 -106.67 
1 1 1   14    3   23 0.00  766.58   21.02  788.48   21.02  571.02  -91.93   88.55  -91.93 
1 1 1   14    3   24 0.00 1058.23   19.12 1061.59   19.12  876.88 -119.92  263.16 -119.92 
1 1 1   14    3   25 0.00  511.37   28.04  509.42   28.04  409.92    1.81  262.18    1.81 
1 1 1   14    3   26 0.00  325.99   45.87  257.83   45.87   97.56  135.93   94.01  -44.07 
1 1 1   14    3   27 0.00  862.97   22.87  862.62   22.87  504.94   23.51  275.96 -156.49 
1 1 1   14    3   28 0.00  162.90   61.25   50.01   61.25  197.69 -146.84  474.73 -146.84 
1 1 1   14    3   29 0.00  401.01   37.38  459.79   37.38  138.86 -121.41  354.14   58.59 
1 1 1   14    3   30 0.00  325.84   48.76  385.37   48.76  161.64  -94.95  166.84   85.05 
1 1 1   14    3   31 0.00  337.78   54.51  317.41   54.51  199.51  -74.51   13.13  -74.51 
1 1 1   14    3   32 0.00  488.39   41.68  416.11   41.68  332.18   93.38   49.94  -86.62 
1 1 1   14    3   33 0.00  643.11   31.28  664.85   31.28  582.38  -23.40   46.98  -23.40 
1 1 1   14    3   34 0.00  164.18   81.37  157.50   81.37   22.32   94.18  112.34   94.18 
1 1 1   14    3   35 0.00  319.77   70.32  237.29   70.32  138.15 -145.09  138.81   34.91 
1 1 1   14    3   36 0.00  376.21   76.74  236.99   76.74  248.51    7.06   42.40 -172.94 
1 1 1   14    3   37 0.00  187.64   80.83  138.48   80.83   28.45  110.71   11.15  -69.29 
1 1 1   14    3   38 0.00  131.37   71.56  112.87   71.56   18.78  -31.89  165.91  -31.89 
1 1 1   14    3   39 0.00  192.45   84.14  178.35   84.14  113.00   25.43  138.41 -154.57 
1 1 1   14    3   40 0.00  204.47   89.35  163.56   89.35  136.32  134.27    3.95  134.27 
1 1 1   14    3   41 0.00  100.41   69.66  132.27   69.66    0.87  152.48  113.93  -27.52 
1 1 1   14    3   42 0.00  122.10   77.40  135.69   77.40    9.68  112.15   20.70  -67.85 
1 1 1   14    3   43 0.00   99.92   62.26   97.54   62.26    5.63  -97.19   77.01   82.81 
1 1 1   14    3   44 0.00   92.95   58.46   92.61   58.46    3.12  138.51   62.78  -41.49 
1 1 1   14    4    1 0.00  408.72   21.49  418.08   21.49   67.59  127.37  532.41  127.37 
1 1 1   14    4    2 0.00 2734.02   31.37 2733.13   31.37 1684.79  -69.29  315.69  -69.29 
1 1 1   14    4    3 1.00 2726.35   24.56 2727.35   24.56 1556.01  106.52   64.23  106.52 
1 1 1   14    4    4 0.00 2677.49   21.39 2718.38   21.39 1363.09  -86.93  295.67   93.07 
1 1 1   14    4    5 0.00 1864.78   21.29 1823.14   21.29 1004.50  -38.01   46.95  141.99 
1 1 1   14    4    6 0.00 1724.18   20.31 1703.21   20.31  965.88  -15.95    7.80  -15.95 
1 1 1   14    4    7 0.00  719.91   16.57  740.43   16.57  344.39   56.47   96.39 -123.53 
1 1 1   14    4    8 0.00 1030.06   19.09 1046.94   19.09  628.78  -33.07  103.98  -33.07 
1 1 1   14    4    9 0.00  889.20   17.10  904.93   17.10  524.22  -38.98   36.32  141.02 
1 1 1   14    4   10 0.00  666.53   16.78  657.83   16.78  442.87 -173.91  131.61 -173.91 
1 1 1   14    4   11 0.00  718.32   18.63  693.39   18.63  403.22  134.45   38.53  -45.55 
1 1 1   14    4   12 0.00  769.81   18.94  779.08   18.94  492.38 -156.44   40.86 -156.44 
1 1 1   14    4   13 0.00  697.17   21.51  651.48   21.51  350.36  -50.23  140.54  129.77 
1 1 1   14    4   14 0.00  771.91   19.24  774.17   19.24  578.82   45.09  187.61   45.09 
1 1 1   14    4   15 0.00  107.05   53.50  126.66   53.50  123.45    0.64  292.25    0.64 
1 1 1   14    4   16 0.00  653.13   22.43  654.07   22.43  340.95 -161.83  138.48   18.17 
1 1 1   14    4   17 1.00  280.99   39.36  254.09   39.36    3.73  -95.21  251.75   84.79 
1 1 1   14    4   18 0.00  745.81   20.19  740.85   20.19  460.87  -71.00   46.13  109.00 
1 1 1   14    4   19 0.00  842.89   20.04  838.43   20.04  481.20  134.23  163.05  -45.77 
1 1 1   14    4   20 0.00  191.19   55.25  170.83   55.25   21.28 -136.18   89.06 -136.18 
1 1 1   14    4   21 0.00  218.63   50.87  230.33   50.87   40.98  -56.71  280.29  -56.71 
1 1 1   14    4   22 0.00 1643.13   16.44 1702.28   16.44 1272.01 -138.31  228.39 -138.31 
1 1 1   14    4   23 0.00  520.57   25.50  535.88   25.50  328.48 -122.81   25.08   57.19 
1 1 1   14    4   24 0.00 1771.53   17.00 1809.08   17.00 1307.56   74.53   44.50   74.53 
1 1 1   14    4   25 1.00  523.66   28.04  529.80   28.04  387.56  162.04   76.26  162.04 
1 1 1   14    4   26 0.00  695.37   24.36  704.32   24.36  603.03 -106.44  217.85 -106.44 
1 1 1   14    4   27 0.00  567.63   30.34  611.49   30.34  559.89 -136.72  349.02 -136.72 
1 1 1   14    4   28 0.00  239.85   59.93  283.65   59.93   58.98 -144.08   93.60   35.92 
1 1 1   14    4   29 0.00  136.35   67.79  120.30   67.79  131.68   19.54  341.49   19.54 
1 1 1   14    4   30 0.00  128.61   65.86  106.95   65.86   50.38 -150.66  126.47 -150.66 
1 1 1   14    4   31 0.00  198.40   73.58  138.29   73.58   39.00  120.31  188.92  120.31 
1 1 1   14    4   32 0.00  209.04   70.15  240.83   70.15   33.75 -119.34  177.51   60.66 
1 1 1   14    4   33 0.00  351.65   49.22  364.54   49.22  279.92   21.21  122.27   21.21 
1 1 1   14    4   34 0.00  405.97   55.16  324.65   55.16  188.02 -161.91  227.37   18.09 
1 1 1   14    4   35 1.00  117.12   74.28  135.30   74.28   24.15  116.40   90.62  116.40 
1 1 1   14    4   36 0.00  103.73   67.79  118.38   67.79   59.75  -61.28  213.81  -61.28 
1 1 1   14    4   37 0.00  171.68   84.81  185.21   84.81   81.80  -22.87   10.86  157.13 
1 1 1   14    4   38 0.00  120.62   78.18  167.38   78.18   28.62  -28.91  106.16  151.09 
1 1 1   14    4   39 0.00  132.06   73.03  119.02   73.03    3.10 -129.84   78.23 -129.84 
1 1 1   14    4   40 0.00  231.95   86.93  163.59   86.93  183.92  -10.56   62.18  169.44 
1 1 1   14    4   41 0.00  165.59   83.02  148.74   83.02   50.12  113.60    7.44  -66.40 
1 1 1   14    4   42 0.00  109.16   67.76  107.47   67.76    2.55  157.36   26.80  -22.64 
1 1 1   14    4   43 0.00  100.71   60.08   86.68   60.08    2.44 -112.51   84.85 -112.51 
1 1 1   14    4   44 0.00   88.04   56.79   91.09   56.79   13.88 -129.74  169.08 -129.74 
1 1 1   14    5    1 0.00 1088.21   20.51 1094.60   20.51  592.27 -115.55   15.35 -115.55 
1 1 1   14    5    2 0.00 2688.23   22.35 2669.42   22.35 1576.00   64.99  180.90   64.99 
1 1 1   14    5    3 0.00 2385.76   21.61 2331.08   21.61 1287.30 -165.87   39.98   14.13 
1 1 1   14    5    4 0.00 2240.02   21.57 2222.24   21.57 1343.81  -97.25  213.04  -97.25 
1 1 1   14    5    5 1.00 2018.62   18.51 1995.79   18.51 1129.92 -148.84   20.04 -148.84 
1 1 1   14    5    6 0.00  762.90   17.62  746.86   17.62  452.53 -127.50  114.11 -127.50 
1 1 1   14    5    7 0.00 1869.03   18.80 1880.08   18.80 1057.04  -69.77    0.48  110.23 
1 1 1   14    5    8 0.00 1257.90   19.48 1248.38   19.48  621.82 -102.70  167.25   77.30 
1 1 1   14    5    9 0.00  337.91   19.73  361.03   19.73   43.54  135.64  253.15  -44.36 
1 1 1   14    5   10 0.00  122.73   34.43  149.94   34.43  239.73    3.61  562.25    3.61 
1 1 1   14    5   11 0.00 1201.50   19.67 1171.13   19.67  773.95  111.52   62.93  111.52 
1 1 1   14    5   12 0.00  593.89   20.24  597.11   20.24  254.69  -54.84  201.63  125.16 
1 1 1   14    5   13 0.00 1192.88   21.08 1128.99   21.08  729.29 -177.89   37.09    2.11 
1 1 1   14    5   14 0.00  416.55   23.38  481.60   23.38  239.37  153.93   29.20  -26.07 
1 1 1   14    5   15 0.00  946.58   24.38  936.86   24.38  490.11  -29.55  222.87  150.45 
1 1 1   14    5   16 0.00  868.43   21.84  888.14   21.84  511.11  -40.78  107.16  139.22 
1 1 1   14    5   17 0.00  491.86   22.28  521.06   22.28  310.36   70.54   18.68   70.54 
1 1 1   14    5   18 0.00  907.69   19.08  958.57   19.08  698.20   84.24  166.89   84.24 
1 1 1   14    5   19 0.00  138.18   57.21  137.00   57.21   50.83  161.86  134.95  161.86 
1 1 1   14    5   20 0.00  672.33   22.27  668.27   22.27  279.72  -23.52  343.17  156.48 
1 1 1   14    5   21 0.00  818.50   21.77  827.94   21.77  444.05  140.67  210.63  -39.33 
1 1 1   14    5   22 0.00  145.53   59.37  119.16   59.37   77.00  -89.01  200.38  -89.01 
1 1 1   14    5   23 1.00 1700.30   16.51 1751.62   16.51 1465.62   38.97  498.63   38.97 
1 1 1   14    5   24 0.00  588.84   25.23  603.13   25.23  475.73   91.48  167.43   91.48 
1 1 1   14    5   25 0.00 1518.06   17.93 1509.66   17.93 1063.82 -137.88   87.40   42.12 
1 1 1   14    5   26 0.00  702.93   24.95  703.20   24.95  429.90  120.64  157.73  -59.36 
1 1 1   14    5   27 0.00  349.93   43.82  354.21   43.82  177.89   83.78   41.58   83.78 
1 1 1   14    5   28 0.00  583.83   27.89  669.79   27.89  513.12   69.47  105.37   69.47 
1 1 1   14    5   29 0.00  699.85   26.48  808.78   26.48  538.62 -130.00   96.96   50.00 
1 1 1   14    5   30 1.00   80.16   52.16   79.10   52.16  109.26   63.94  241.37   63.94 
1 1 1   14    5   31 0.00  245.15   68.36  243.63   68.36   45.42 -118.71  189.81   61.29 
1 1 1   14    5   32 0.00  249.00   71.54  169.90   71.54   26.82  -24.39  103.28  155.61 
1 1 1   14    5   33 0.00  246.57   69.50  280.02   69.50   99.06 -141.56  143.31   38.44 
1 1 1   14    5   34 0.00  293.70   68.57  230.05   68.57   83.16  -71.22  221.13  108.78 
1 1 1   14    5   35 0.00  152.86   74.76  109.11   74.76   58.88  168.26  223.25  168.26 
1 1 1   14    5   36 1.00  225.67   83.81  133.73   83.81   64.96  -55.17  156.31  124.83 
1 1 1   14    5   37 0.00  132.91   81.09  204.97   81.09   83.97   -8.67   80.58  171.33 
1 1 1   14    5   38 0.00  138.31   71.46  103.67   71.46    7.02  -98.09   73.65  -98.09 
1 1 1   14    5   39 0.00  138.39   75.23  129.22   75.23   22.37 -175.11  258.14 -175.11 
1 1 1   14    5   40 0.00   88.73   58.52   92.29   58.52   33.71   -9.40  121.53   -9.40 
1 1 1   14    5   41 0.00  110.82   64.64   98.53   64.64   35.53   -2.32  199.07   -2.32 
1 1 1   14    5   42 0.00  120.67   76.17  134.08   76.17   36.90  -38.58   44.42  141.42 
1 1 1   14    5   43 0.00   94.84   61.87  100.77   61.87    0.39 -175.20    4.31    4.80 
1 1 1   14    5   44 0.00   84.31   54.14   84.87   54.14   27.03  -38.84  179.58  -38.84 
1 1 1   14    6    1 0.00  933.66   17.56  917.27   17.56  532.13 -136.04  106.19 -136.04 
1 1 1   14    6    2 0.00  505.15   20.87  525.90   20.87   87.01   46.88  323.71 -133.12 
1 1 1   14    6    3 0.00 2581.36   17.89 2539.11   17.89 1371.54  179.02   88.82   -0.98 
1 1 1   14    6    4 0.00  468.15   17.86  455.30   17.86   28.61  100.05  409.91  -79.95 
1 1 1   14    6    5 0.00 1714.48   18.54 1739.05   18.54 1035.31  166.26  159.09  166.26 
1 1 1   14    6    6 0.00 1399.36   18.05 1423.20   18.05  724.95  -92.46  116.41   87.54 
1 1 1   14    6    7 0.00  313.39   21.76  336.12   21.76   54.08  -70.26  103.49  109.74 
1 1 1   14    6    8 0.00 1068.89   18.78 1069.15   18.78  611.10   89.87   71.25  -90.13 
1 1 1   14    6    9 0.00  501.54   17.82  510.97   17.82  197.30  -54.04  122.08  -54.04 
1 1 1   14    6   10 0.00 1311.29   17.88 1275.15   17.88  857.27   42.59  109.26   42.59 
1 1 1   14    6   11 0.00  350.12   28.25  373.20   28.25   21.46 -129.72  436.74 -129.72 
1 1 1   14    6   12 0.00 1121.50   19.73 1108.40   19.73  623.36   96.70  172.12  -83.30 
1 1 1   14    6   13 0.00  159.26   36.92  213.38   36.92   52.09  -56.77  204.36  -56.77 
1 1 1   14    6   14 0.00  956.83   19.22  989.64   19.22  784.81  -10.95  325.77  -10.95 
1 1 1   14    6   15 0.00  406.07   25.08  422.03   25.08  142.38  -63.40  188.73  116.60 
1 1 1   14    6   16 0.00  412.09   26.00  425.39   26.00  221.37  169.04  105.73  169.04 
1 1 1   14    6   17 0.00  473.67   22.54  518.59   22.54  280.21 -123.23   33.64   56.77 
1 1 1   14    6   18 0.00  747.40   20.53  709.53   20.53  340.43   24.91  275.60 -155.09 
1 1 1   14    6   19 0.00  457.77   24.40  464.48   24.40  248.18 -171.41  160.08 -171.41 
1 1 1   14    6   20 0.00 1460.07   18.84 1499.96   18.84 1115.79   88.21  178.67   88.21 
1 1 1   14    6   21 0.00  720.06   22.18  694.91   22.18  324.35  143.49  290.10  -36.51 
1 1 1   14    6   22 0.00 1784.89   19.60 1813.73   19.60 1438.55  -24.06  378.57  -24.06 
1 1 1   14    6   23 0.00  197.06   59.04  134.20   59.04   50.33  -20.90  177.32  -20.90 
1 1 1   14    6   24 0.00 1118.18   19.51 1136.37   19.51  710.72  145.38  187.43  -34.62 
1 1 1   14    6   25 0.00  586.07   26.11  609.15   26.11  386.40  141.39   57.46  -38.61 
1 1 1   14    6   26 1.00  472.96   31.27  451.88   31.27  310.02   80.07    7.29   80.07 
1 1 1   14    6   27 0.00  667.10   26.12  672.85   26.12  667.73   30.88  410.03   30.88 
1 1 1   14    6   28 0.00  412.43   38.15  422.96   38.15  297.68 -127.26  143.57 -127.26 
1 1 1   14    6   29 0.00  480.49   31.70  611.69   31.70  510.59 -157.46  250.06 -157.46 
1 1 1   14    6   30 0.00  287.45   58.04  302.35   58.04  107.94  113.50  169.29  -66.50 
1 1 1   14    6   31 0.00  511.56   36.71  502.22   36.71  411.63 -159.02   26.31 -159.02 
1 1 1   14    6   32 0.00  702.52   29.42  704.47   29.42  487.76 -129.11  220.75   50.89 
1 1 1   14    6   33 0.00  133.05   72.40  150.45   72.40   83.78   87.18  270.13   87.18 
1 1 1   14    6   34 0.00  642.66   34.52  637.37   34.52  646.75  -75.55  153.00  -75.55 
1 1 1   14    6   35 0.00  431.94   48.55  411.13   48.55  329.41  151.17  101.65  -28.83 
1 1 1   14    6   36 0.00  288.12   71.48  246.39   71.48  245.62  -21.63  130.53  -21.63 
1 1 1   14    6   37 0.00  168.24   86.47  214.76   86.47  137.15 -120.00   46.89   60.00 
1 1 1   14    6   38 0.00  344.04   74.01  292.23   74.01  477.00  -30.57  306.43  -30.57 
1 1 1   14    6   39 0.00  113.75   77.72  172.11   77.72    3.59   68.30  235.71 -111.70 
1 1 1   14    6   40 0.00  124.11   83.00  224.67   83.00  116.72 -118.78  165.62   61.22 
1 1 1   14    6   41 0.00  180.63   83.80  180.12   83.80  165.37 -141.92   11.25 -141.92 
1 1 1   14    6   42 0.00  114.46   66.58   96.11   66.58    1.13    6.60   32.60 -173.40 
1 1 1   14    6   43 0.00  100.00   67.07  116.08   67.07   41.03   36.44  135.45 -143.56 
1 1 1   14    6   44 0.00   88.74   60.38  104.09   60.38    5.33  -86.94   29.47   93.06 
1 1 1   14    7    1 0.00 2532.36   16.34 2637.50   16.34 1490.60  -10.38  148.78  -10.38 
1 1 1   14    7    2 0.00 1946.54   17.23 2002.75   17.23 1141.90  127.24  125.59  127.24 
1 1 1   14    7    3 0.00 1412.04   16.38 1444.31   16.38  667.59   16.77  221.68 -163.23 
1 1 1   14    7    4 0.00 2144.68   17.46 2066.00   17.46 1185.97   43.34   52.40   43.34 
1 1 1   14    7    5 0.00 1991.05   19.29 1978.22   19.29 1231.36  168.04  268.71  168.04 
1 1 1   14    7    6 0.00  545.88   17.56  546.02   17.56  246.57  -36.31   45.91  143.69 
1 1 1   14    7    7 0.00  905.44   18.84  894.01   18.84  542.09  175.35   24.80  175.35 
1 1 1   14    7    8 0.00 1219.00   18.15 1225.58   18.15  715.73  -94.60   53.29   85.40 
1 1 1   14    7    9 0.00 1795.58   18.33 1793.96   18.33 1030.35    2.00  166.95 -178.00 
1 1 1   14    7   10 0.00  935.01   20.04  950.14   20.04  682.68  143.38  230.32  143.38 
1 1 1   14    7   11 0.00  531.76   23.52  498.18   23.52  217.46  -93.42  136.95  -93.42 
1 1 1   14    7   12 1.00 1478.03   21.17 1498.57   21.17 1072.50  -67.01  243.97  -67.01 
1 1 1   14    7   13 0.00  736.15   19.14  757.69   19.14  641.04  -56.04  392.94  -56.04 
1 1 1   14    7   14 1.00  253.14   32.55  225.81   32.55  133.26 -168.96  514.43 -168.96 
1 1 1   14    7   15 0.00  612.06   20.75  644.78   20.75  453.68  -31.03  160.95  -31.03 
1 1 1   14    7   16 0.00  248.85   36.43  197.54   36.43    1.15  125.80   89.18  -54.20 
1 1 1   14    7   17 0.00 1113.13   19.61 1169.17   19.61  715.80   76.75   73.67 -103.25 
1 1 1   14    7   18 0.00 1046.19   19.92 1082.76   19.92  745.79  110.25   74.70  110.25 
1 1 1   14    7   19 0.00  142.06   53.47  160.49   53.47  176.06   31.53  469.51   31.53 
1 1 1   14    7   20 0.00 1212.38   18.85 1227.61   18.85 1102.44   27.98  533.91   27.98 
1 1 1   14    7   21 0.00 1709.02   18.64 1695.46   18.64 1181.12  -94.81   36.66  -94.81 
1 1 1   14    7   22 0.00  914.73   20.76  980.21   20.76  640.14   -5.61   11.75  174.39 
1 1 1   14    7   23 0.00 1095.20   19.62 1130.70   19.62  872.57 -169.78  192.99 -169.78 
1 1 1   14    7   24 0.00  328.61   38.71  396.34   38.71   36.19   97.55  395.78  -82.45 
1 1 1   14    7   25 0.00  226.82   52.96  258.72   52.96   27.47   40.49  149.09 -139.51 
1 1 1   14    7   26 0.00  321.35   42.79  320.73   42.79   16.24 -169.87  455.97 -169.87 
1 1 1   14    7   27 0.00  996.62   21.09 1099.84   21.09 1000.43 -141.22  431.96 -141.22 
1 1 1   14    7   28 0.00  564.12   29.13  579.50   29.13  527.24  117.81  399.97  117.81 
1 1 1   14    7   29 0.00  641.38   29.18  724.49   29.18  569.58 -106.46   92.18 -106.46 
1 1 1   14    7   30 0.00  460.58   36.80  480.77   36.80  434.12   50.05  211.52   50.05 
1 1 1   14    7   31 0.00  381.32   45.23  403.44   45.23  262.85 -129.09   61.98   50.91 
1 1 1   14    7   32 0.00  221.84   60.49  335.71   60.49  129.72   -0.81    5.81   -0.81 
1 1 1   14    7   33 0.00  581.42   33.97  533.16   33.97  485.53 -170.11   23.82 -170.11 
1 1 1   14    7   34 0.00  155.86   75.79  218.72   75.79   22.27 -177.06  259.99 -177.06 
1 1 1   14    7   35 0.00  125.53   67.41  105.29   67.41   13.12  -48.82   41.70  -48.82 
1 1 1   14    7   36 0.00  128.52   72.64  141.45   72.64   20.42  164.35  180.58  164.35 
1 1 1   14    7   37 0.00  134.77   71.25  106.23   71.25    2.23 -152.79   35.17 -152.79 
1 1 1   14    7   38 0.00  183.33   85.04  213.09   85.04  119.86    8.41  174.72 -171.59 
1 1 1   14    7   39 0.00  120.27   78.86  162.89   78.86   15.51 -132.97  170.25   47.03 
1 1 1   14    7   40 0.00  109.96   71.56  134.09   71.56    6.37  -97.49  139.76   82.51 
1 1 1   14    7   41 0.00  130.84   82.47  146.01   82.47   45.22  122.87  174.06  -57.13 
1 1 1   14    7   42 0.00  105.32   63.53   92.44   63.53   25.80  160.21  184.53  160.21 
1 1 1   14    7   43 0.00  106.82   70.30  124.53   70.30   60.66  -72.17   47.42  107.83 
1 1 1   14    7   44 0.00   82.70   51.79   77.14   51.79   22.54   80.79  116.80   80.79 
1 1 1   14    8    1 0.00 1221.58   16.37 1184.99   16.37  764.63  -17.21  250.28  -17.21 
1 1 1   14    8    2 0.00 1431.50   16.95 1419.30   16.95  745.42  -39.75   47.64  140.25 
1 1 1   14    8    3 0.00 2249.73   15.96 2228.70   15.96 1221.90   18.64    3.74 -161.36 
1 1 1   14    8    4 0.00 1161.56   16.84 1168.15   16.84  751.37  159.91  255.24  159.91 
1 1 1   14    8    5 0.00  785.05   16.75  812.60   16.75  448.46  -90.60   61.49  -90.60 
1 1 1   14    8    6 0.00 1039.82   18.36 1034.64   18.36  856.02   23.31  522.81   23.31 
1 1 1   14    8    7 0.00 1744.71   21.45 1747.62   21.45 1086.23 -144.38   53.55 -144.38 
1 1 1   14    8    8 0.00 1602.16   19.00 1612.32   19.00 1007.74   16.73   51.77   16.73 
1 1 1   14    8    9 0.00 1260.12   20.04 1227.02   20.04  925.88   94.56  340.70   94.56 
1 1 1   14    8   10 0.00 1660.56   20.19 1640.21   20.19 1052.18 -115.35   45.60 -115.35 
1 1 1   14    8   11 0.00 1583.19   19.86 1578.43   19.86 1032.53  -70.69   67.47  -70.69 
1 1 1   14    8   12 0.00  133.40   41.93  193.01   41.93   99.09 -173.00  295.06 -173.00 
1 1 1   14    8   13 0.00   88.17   45.90   61.14   45.90   84.36 -123.40  179.92 -123.40 
1 1 1   14    8   14 0.00  786.87   24.98  840.89   24.98  634.60   18.98  279.22   18.98 
1 1 1   14    8   15 0.00  575.86   20.38  582.84   20.38  196.04  -59.27  324.32  120.73 
1 1 1   14    8   16 0.00 1102.62   18.79 1167.67   18.79  775.43  172.88   79.32  172.88 
1 1 1   14    8   17 0.00  694.43   20.63  707.85   20.63  515.82   84.97  151.84   84.97 
1 1 1   14    8   18 0.00  735.24   21.57  822.28   21.57  533.22  -82.44   53.51  -82.44 
1 1 1   14    8   19 0.00  647.27   21.25  693.45   21.25  492.55    5.65  122.56    5.65 
1 1 1   14    8   20 0.00 1159.85   19.57 1178.77   19.57  819.93 -134.44   86.14 -134.44 
1 1 1   14    8   21 0.00 1793.65   18.89 1774.92   18.89 1362.41 -117.67  289.95 -117.67 
1 1 1   14    8   22 0.00  733.89   22.89  773.04   22.89  522.83  129.11   38.67  129.11 
1 1 1   14    8   23 0.00  452.68   29.26  540.89   29.26  310.03  168.58   13.17  -11.42 
1 1 1   14    8   24 0.00  202.90   53.68  223.65   53.68  102.64 -146.20  436.66 -146.20 
1 1 1   14    8   25 0.00  641.51   27.03  618.64   27.03  423.75 -107.33   31.96   72.67 
1 1 1   14    8   26 0.00  156.62   61.45  242.72   61.45   14.03 -119.05  137.82 -119.05 
1 1 1   14    8   27 0.00  576.10   29.47  572.96   29.47  286.93   42.98  263.94 -137.02 
1 1 1   14    8   28 0.00  368.97   41.34  402.07   41.34  208.72 -176.43   94.46    3.57 
1 1 1   14    8   29 0.00  216.30   68.46  185.96   68.46  115.76  178.44  464.38  178.44 
1 1 1   14    8   30 0.00  317.93   50.81  323.50   50.81  157.54  117.11  110.51  -62.89 
1 1 1   14    8   31 0.00  218.39   69.66  223.60   69.66   32.81  -41.55  150.61  138.45 
1 1 1   14    8   32 0.00  422.87   49.11  400.95   49.11  298.43  170.91   47.23   -9.09 
1 1 1   14    8   33 0.00  228.80   63.26  334.88   63.26  109.12 -143.97   21.55 -143.97 
1 1 1   14    8   34 0.00  242.33   73.76  240.62   73.76   69.64  102.82   18.43  -77.18 
1 1 1   14    8   35 0.00  532.36   37.27  583.15   37.27  586.83 -169.38  144.76 -169.38 
1 1 1   14    8   36 0.00  137.34   68.91   99.03   68.91   18.86  121.61  144.32  121.61 
1 1 1   14    8   37 0.00  348.51   60.33  367.34   60.33  378.08  -71.82  103.52  108.18 
1 1 1   14    8   38 0.00  293.54   79.39  282.32   79.39  383.37  -72.84  119.58  -72.84 
1 1 1   14    8   39 0.00  126.72   71.05  119.11   71.05    0.83  153.57  109.25  153.57 
1 1 1   14    8   40 1.00  133.24   86.09  215.39   86.09  148.17  108.38   35.98  -71.62 
1 1 1   14    8   41 0.00  124.05   78.85  135.15   78.85   18.49 -146.31   40.43   33.69 
1 1 1   14    8   42 0.00  128.36   79.08  137.41   79.08   66.95  -66.17   92.24  113.83 
1 1 1   14    8   43 0.00   88.92   58.56   94.22   58.56    2.41  163.37   45.60  -16.63 
1 1 1   14    8   44 0.00   86.54   56.27   90.54   56.27   20.78 -175.11  186.82 -175.11 
1 1 1   14    9    1 0.00  852.10   15.90  861.02   15.90  469.63  -62.02   54.41  -62.02 
1 1 1   14    9    2 1.00  485.19   17.15  533.86   17.15  195.32  -14.51   93.83  165.49 
1 1 1   14    9    3 0.00 1349.00   16.66 1383.80   16.66  892.72  141.51  323.52  141.51 
1 1 1   14    9    4 0.00 1984.83   16.69 2016.33   16.69 1198.63  -81.47  215.47  -81.47 
1 1 1   14    9    5 0.00  551.00   18.36  600.31   18.36  363.62   27.25  177.97   27.25 
1 1 1   14    9    6 0.00 1829.81   17.14 1833.75   17.14  998.77  133.52  204.51  -46.48 
1 1 1   14    9    7 0.00  647.23   18.95  621.85   18.95  199.29   28.87  330.92 -151.13 
1 1 1   14    9    8 0.00  777.24   18.27  748.82   18.27  515.61   93.09  161.07   93.09 
1 1 1   14    9    9 0.00  935.95   19.18  905.85   19.18  498.55 -106.85  109.09   73.15 
1 1 1   14    9   10 0.00  851.15   20.02  881.77   20.02  600.95  -85.91  154.94  -85.91 
1 1 1   14    9   11 0.00 1736.83   18.32 1710.50   18.32  949.23   93.83  280.51  -86.17 
1 1 1   14    9   12 0.00  981.32   21.40  977.37   21.40  596.49  158.52   36.34  -21.48 
1 1 1   14    9   13 0.00  950.32   23.65  962.99   23.65  610.66 -147.64   41.81 -147.64 
1 1 1   14    9   14 0.00  838.44   24.88  856.51   24.88  531.57  -80.48   13.28  -80.48 
1 1 1   14    9   15 0.00  956.06   23.01 1001.83   23.01  691.11  105.67  144.50  105.67 
1 1 1   14    9   16 0.00  545.27   20.95  554.10   20.95  337.52   66.77   17.46   66.77 
1 1 1   14    9   17 0.00  307.95   24.98  330.47   24.98   78.06   81.94  171.52  -98.06 
1 1 1   14    9   18 1.00  942.86   19.82  977.86   19.82  704.46  -22.00  144.49  -22.00 
1 1 1   14    9   19 0.00 1162.86   19.14 1215.05   19.14 1003.95  156.36  407.59  156.36 
1 1 1   14    9   20 0.00  101.25   49.09   74.99   49.09   48.46  -99.95  107.11  -99.95 
1 1 1   14    9   21 0.00  400.34   29.79  389.15   29.79  194.27   68.49   57.23 -111.51 
1 1 1   14    9   22 0.00  856.72   20.67  839.48   20.67  457.04  110.65  238.78  -69.35 
1 1 1   14    9   23 0.00  381.53   37.95  302.34   37.95   32.63 -125.86  500.17 -125.86 
1 1 1   14    9   24 0.00  594.71   26.47  575.90   26.47  276.39  114.35  251.73  -65.65 
1 1 1   14    9   25 0.00 1058.78   21.25 1073.56   21.25  866.37  107.44  194.16  107.44 
1 1 1   14    9   26 0.00  490.12   34.59  503.07   34.59  177.63    0.86  343.27 -179.14 
1 1 1   14    9   27 0.00  994.48   22.51 1057.93   22.51  592.61  160.67  370.64  -19.33 
1 1 1   14    9   28 1.00  305.55   44.75  383.19   44.75  115.09  -52.70  231.53  127.30 
1 1 1   14    9   29 0.00  610.71   30.02  601.51   30.02  519.82  -57.37  132.64  -57.37 
1 1 1   14    9   30 0.00  322.25   45.25  412.86   45.25  160.67 -119.84  217.06   60.16 
1 1 1   14    9   31 0.00  495.28   32.11  545.18   32.11  387.77   36.33   52.90 -143.67 
1 1 1   14    9   32 0.00  188.09   70.72  129.04   70.72   30.32    8.11  147.96    8.11 
1 1 1   14    9   33 0.00  517.02   38.81  531.36   38.81  437.56  145.30    9.46  -34.70 
1 1 1   14    9   34 0.00  245.14   65.17  305.38   65.17   82.92  107.07  262.39  -72.93 
1 1 1   14    9   35 0.00  391.83   56.17  315.93   56.17  321.65  -54.52   18.47  -54.52 
1 1 1   14    9   36 0.00  175.66   76.13  142.76   76.13    9.16    6.42    5.15 -173.58 
1 1 1   14    9   37 0.00  142.11   72.22  124.45   72.22    7.54  -99.71   65.96   80.29 
1 1 1   14    9   38 0.00  108.77   64.44  105.46   64.44   57.33 -163.31  224.43 -163.31 
1 1 1   14    9   39 0.00   78.94   57.12   96.46   57.12   41.86  -62.38  130.29  -62.38 
1 1 1   14    9   40 0.00   89.37   65.95  121.27   65.95   15.61  -58.57  115.75  -58.57 
1 1 1   14    9   41 1.00  122.92   73.70  112.00   73.70    2.05 -150.78  166.81 -150.78 
1 1 1   14    9   42 0.00  108.19   67.20  106.24   67.20   23.27  124.74   86.90  -55.26 
1 1 1   14    9   43 1.00   93.85   63.07  106.72   63.07   10.41   65.75   33.27 -114.25 
1 1 1   14    9   44 0.00   84.40   55.65   90.40   55.65    2.10  126.14   32.18  126.14 
1 1 1   14   10    1 0.00 1205.71   15.02 1213.36   15.02  768.45  -18.70  151.63  -18.70 
1 1 1   14   10    2 0.00 1270.14   15.05 1275.07   15.05  795.20  -16.35  123.22  -16.35 
1 1 1   14   10    3 0.00  726.02   15.11  704.57   15.11  449.86 -142.09  124.77 -142.09 
1 1 1   14   10    4 0.00 1585.08   15.82 1556.82   15.82  910.10  106.71   26.64  -73.29 
1 1 1   14   10    5 0.00 2566.63   15.73 2590.34   15.73 1572.14  118.38   67.81  118.38 
1 1 1   14   10    6 0.00  303.40   24.42  299.32   24.42   22.12  110.56  179.54  -69.44 
1 1 1   14   10    7 0.00 1220.67   17.02 1255.46   17.02  772.95   58.63   71.41   58.63 
1 1 1   14   10    8 0.00  931.43   18.36  943.38   18.36  382.95 -173.55  353.80    6.45 
1 1 1   14   10    9 0.00  867.75   18.59  921.76   18.59  529.45 -137.53   17.63   42.47 
1 1 1   14   10   10 0.00  239.51   37.55  187.65   37.55   37.64  113.61  218.56  113.61 
1 1 1   14   10   11 0.00  887.63   18.82  946.79   18.82  707.88  146.60  300.69  146.60 
1 1 1   14   10   12 0.00  960.54   21.86  968.33   21.86  605.71  -56.23    6.74  -56.23 
1 1 1   14   10   13 0.00  436.91   31.47  479.00   31.47   94.59  165.77   65.08  165.77 
1 1 1   14   10   14 0.00 1359.75   23.37 1379.49   23.37  748.70   11.33  238.39 -168.67 
1 1 1   14   10   15 0.00  861.20   21.97  890.80   21.97  493.17  -18.54  118.08  161.46 
1 1 1   14   10   16 0.00 1291.20   20.98 1289.96   20.98  893.89  -44.75  115.81  -44.75 
1 1 1   14   10   17 0.00  536.90   23.52  535.23   23.52  240.83   99.11  182.09  -80.89 
1 1 1   14   10   18 0.00 1027.99   22.10 1062.08   22.10  790.33   31.51  203.23   31.51 
1 1 1   14   10   19 0.00 1479.28   20.38 1543.27   20.38 1173.14 -155.22  295.30 -155.22 
1 1 1   14   10   20 0.00  823.09   20.75  817.56   20.75  444.35  -48.16  183.46  131.84 
1 1 1   14   10   21 0.00  100.66   55.76  115.39   55.76  114.29  -76.11  266.46  -76.11 
1 1 1   14   10   22 0.00 1321.90   18.38 1328.40   18.38  897.58   49.42   26.85 -130.58 
1 1 1   14   10   23 0.00   70.10   55.16  152.98   55.16   54.40 -105.19  133.80 -105.19 
1 1 1   14   10   24 0.00  863.39   21.14  892.42   21.14  540.53  109.61  154.30  -70.39 
1 1 1   14   10   25 1.00  558.07   25.54  652.78   25.54  211.93  -36.48  429.41  143.52 
1 1 1   14   10   26 0.00  149.97   61.75  162.81   61.75   41.66   73.28  134.39   73.28 
1 1 1   14   10   27 0.00  137.01   63.18  133.46   63.18   47.54  138.71  130.31  138.71 
1 1 1   14   10   28 0.00  999.80   22.00 1045.93   22.00  893.61  -43.99  216.11  -43.99 
1 1 1   14   10   29 0.00  426.89   33.52  545.29   33.52  301.66  163.30  122.23  -16.70 
1 1 1   14   10   30 0.00  280.83   59.61  162.08   59.61   43.70  -20.86   97.52  159.14 
1 1 1   14   10   31 0.00  391.44   38.45  444.15   38.45  348.34   69.28   87.32   69.28 
1 1 1   14   10   32 0.00  335.95   48.73  331.49   48.73  195.56  121.26   92.80  -58.74 
1 1 1   14   10   33 0.00  361.36   43.83  469.29   43.83  198.12   73.77  301.75 -106.23 
1 1 1   14   10   34 0.00  212.08   74.57  217.28   74.57   75.00  104.29  104.43  -75.71 
1 1 1   14   10   35 0.00  394.14   50.59  390.73   50.59  576.24 -123.58  375.86 -123.58 
1 1 1   14   10   36 0.00  275.72   73.08  161.06   73.08  198.68 -155.84   49.08 -155.84 
1 1 1   14   10   37 0.00  506.08   44.46  439.67   44.46  548.68  -47.13   64.28  132.87 
1 1 1   14   10   38 0.00  125.60   66.69  102.63   66.69   35.29 -144.66  181.23 -144.66 
1 1 1   14   10   39 0.00   79.69   65.85  133.25   65.85   14.61 -134.61   91.99 -134.61 
1 1 1   14   10   40 0.00  137.98   72.16  116.26   72.16   15.47   43.57   52.01 -136.43 
1 1 1   14   10   41 0.00  142.04   81.91  123.38   81.91   19.34   92.31  226.15  -87.69 
1 1 1   14   10   42 1.00   96.67   60.46   90.88   60.46   11.61  177.25  148.94  177.25 
1 1 1   14   10   43 0.00   94.37   59.48   92.39   59.48    3.86  126.66   78.78  -53.34 
1 1 1   14   11    1 0.00 1639.73   14.79 1698.43   14.79 1114.94   95.27  307.45   95.27 
1 1 1   14   11    2 0.00 1555.21   15.00 1607.65   15.00 1066.98 -164.85  308.74 -164.85 
1 1 1   14   11    3 0.00  808.92   14.99  810.06   14.99  501.62  172.19  107.41  172.19 
1 1 1   14   11    4 0.00 1216.60   14.94 1249.02   14.94  558.70   72.57  318.30 -107.43 
1 1 1   14   11    5 0.00  631.65   16.54  660.84   16.54  305.21   60.63  102.95 -119.37 
1 1 1   14   11    6 0.00 1656.18   18.68 1679.81   18.68  962.89   17.37   58.36 -162.63 
1 1 1   14   11    7 0.00  219.49   33.26  183.98   33.26   90.07  -99.84  296.12  -99.84 
1 1 1   14   11    8 0.00  835.52   18.09  844.26   18.09  588.21 -130.16  195.22 -130.16 
1 1 1   14   11    9 0.00  401.61   23.67  384.89   23.67  143.00  170.81   64.16  170.81 
1 1 1   14   11   10 0.00 1019.80   17.75 1021.30   17.75  749.50  151.30  262.36  151.30 
1 1 1   14   11   11 0.00  290.49   30.98  335.57   30.98   88.44    8.50   57.38 -171.50 
1 1 1   14   11   12 1.00  373.39   28.71  385.76   28.71  237.76  170.06  919.73  170.06 
1 1 1   14   11   13 0.00  228.34   60.79  197.44   60.79   47.86  122.95  247.99  122.95 
1 1 1   14   11   14 0.00  671.05   27.75  680.76   27.75  309.72  -60.04  205.39  119.96 
1 1 1   14   11   15 0.00 1115.45   23.14 1106.15   23.14  868.10 -127.35  336.90 -127.35 
1 1 1   14   11   16 0.00  532.28   30.50  502.91   30.50  290.65  -87.44   30.21   92.56 
1 1 1   14   11   17 0.00  507.41   31.26  504.16   31.26  221.71  122.43  173.90  -57.57 
1 1 1   14   11   18 0.00  606.43   23.65  587.92   23.65  402.87  -45.60   67.22  -45.60 
1 1 1   14   11   19 0.00  187.92   48.88  290.83   48.88   19.31   45.69   59.79 -134.31 
1 1 1   14   11   20 0.00 1251.34   20.14 1322.89   20.14  968.59   52.97  237.21   52.97 
1 1 1   14   11   21 0.00  857.71   20.83  898.23   20.83  534.02  168.80   95.77  -11.20 
1 1 1   14   11   22 0.00  860.59   21.28  905.01   21.28  425.55 -133.79  345.79   46.21 
1 1 1   14   11   23 0.00 1445.75   20.54 1419.04   20.54 1089.52  -36.09  179.65  -36.09 
1 1 1   14   11   24 0.00  583.01   27.54  580.56   27.54  401.76  -10.19   26.80  -10.19 
1 1 1   14   11   25 0.00 1098.28   20.00 1139.37   20.00  863.05   20.90  117.66   20.90 
1 1 1   14   11   26 0.00  344.80   38.82  355.78   38.82  137.28 -145.28  159.82   34.72 
1 1 1   14   11   27 0.00  810.66   24.92  795.81   24.92  706.32 -135.54  235.93 -135.54 
1 1 1   14   11   28 0.00  595.89   28.11  579.70   28.11  443.99  142.82   29.84  142.82 
1 1 1   14   11   29 0.00  417.38   36.86  362.49   36.86  159.82    4.60  106.03    4.60 
1 1 1   14   11   30 0.00  570.28   30.95  580.48   30.95  453.88   36.27   13.47   36.27 
1 1 1   14   11   31 0.00  570.77   32.26  547.72   32.26  375.95   71.36  148.34 -108.64 
1 1 1   14   11   32 0.00  280.31   58.37  242.78   58.37   58.92  -30.86    1.21  149.14 
1 1 1   14   11   33 0.00  452.87   39.10  434.08   39.10  381.35   73.19   41.91   73.19 
1 1 1   14   11   34 1.00  255.59   70.99  225.70   70.99  119.53  -28.27   78.15  151.73 
1 1 1   14   11   35 1.00  158.74   72.92  112.70   72.92    1.62  133.16   71.25  133.16 
1 1 1   14   11   36 0.00  125.43   72.09  143.97   72.09   11.21    4.32  209.38    4.32 
1 1 1   14   11   37 0.00  156.84   77.82  191.73   77.82   83.32  -56.70  111.70  123.30 
1 1 1   14   11   38 0.00   96.73   70.28  150.08   70.28   64.48   -2.40  328.88   -2.40 
1 1 1   14   11   39 0.00   66.94   68.45  161.50   68.45    7.26   17.52   40.95 -162.48 
1 1 1   14   11   40 0.00  212.68   82.64  157.50   82.64  164.18   79.26   90.02 -100.74 
1 1 1   14   11   41 0.00  110.65   69.72  110.93   69.72    7.69   18.60  110.46 -161.40 
1 1 1   14   11   42 0.00  100.11   64.59  101.41   64.59   16.68  -37.71   51.36  142.29 
1 1 1   14   11   43 0.00   90.39   57.65   90.15   57.65    4.06  -79.10  109.91  -79.10 
1 1 1   14   12    1 0.00  309.36   19.30  298.09   19.30    7.62 -119.42  225.48   60.58 
1 1 1   14   12    2 0.00  543.37   16.05  546.92   16.05  315.56  -56.39  147.38  -56.39 
1 1 1   14   12    3 0.00 1349.29   15.17 1324.58   15.17  873.95   38.15  214.60   38.15 
1 1 1   14   12    4 0.00  543.53   16.94  515.99   16.94  272.92  -15.83   17.07  -15.83 
1 1 1   14   12    5 0.00 1180.42   17.03 1194.12   17.03  795.67   -8.41  220.67   -8.41 
1 1 1   14   12    6 0.00 1237.40   17.02 1223.14   17.02  712.65  -15.06   16.23  164.94 
1 1 1   14   12    7 1.00  529.70   20.16  490.62   20.16  237.31 -123.75   82.88   56.25 
1 1 1   14   12    8 0.00  909.35   19.57  913.56   19.57  688.40  104.02  314.96  104.02 
1 1 1   14   12    9 0.00 1072.57   17.99 1048.26   17.99  790.30   72.94  313.66   72.94 
1 1 1   14   12   10 0.00  262.51   25.73  327.33   25.73   61.93   43.49  109.61 -136.51 
1 1 1   14   12   11 1.00  957.48   20.88  978.27   20.88  754.99   15.79  372.34   15.79 
1 1 1   14   12   12 0.00  392.75   37.03  350.75   37.03  156.84 -115.70   21.20   64.30 
1 1 1   14   12   13 0.00  631.78   28.43  653.32   28.43  369.30 -178.94   18.40    1.06 
1 1 1   14   12   14 0.00  419.47   38.79  425.11   38.79  229.83  141.03   95.57  141.03 
1 1 1   14   12   15 0.00  183.86   60.93  266.47   60.93    1.50  122.67  128.43  122.67 
1 1 1   14   12   16 0.00  687.47   27.34  683.47   27.34  398.08   83.67   52.80  -96.33 
1 1 1   14   12   17 0.00 1490.81   24.09 1429.14   24.09 1131.23  144.13  357.16  144.13 
1 1 1   14   12   18 0.00  463.78   35.68  481.14   35.68  317.97   -9.18  150.61   -9.18 
1 1 1   14   12   19 0.00 2004.87   22.85 2017.96   22.85 1436.12 -108.01  241.61 -108.01 
1 1 1   14   12   20 0.00 1321.16   20.34 1372.47   20.34  902.52  -95.09   28.41  -95.09 
1 1 1   14   12   21 0.00 1305.51   21.40 1322.75   21.40 1002.37  -75.64  247.28  -75.64 
1 1 1   14   12   22 0.00  946.40   21.14  953.14   21.14  497.79   13.81  288.89 -166.19 
1 1 1   14   12   23 0.00 1242.24   20.13 1265.65   20.13  890.05   60.98   42.44   60.98 
1 1 1   14   12   24 1.00  327.39   32.57  389.03   32.57  174.50 -167.08   60.75 -167.08 
1 1 1   14   12   25 0.00  304.78   40.29  303.76   40.29   60.00  -70.70    3.24  -70.70 
1 1 1   14   12   26 0.00 1042.82   22.39 1037.44   22.39 1071.44 -142.56  646.73 -142.56 
1 1 1   14   12   27 0.00 1382.86   19.44 1431.97   19.44 1216.91   98.64  313.92   98.64 
1 1 1   14   12   28 0.00  365.86   38.90  363.42   38.90  209.37   60.85   28.40 -119.15 
1 1 1   14   12   29 0.00  426.30   31.95  515.18   31.95  311.23    6.09   65.43 -173.91 
1 1 1   14   12   30 0.00  305.67   50.87  292.50   50.87  141.69  -42.90   29.63  -42.90 
1 1 1   14   12   31 0.00  171.16   67.47  227.98   67.47   10.91   34.62  135.47 -145.38 
1 1 1   14   12   32 0.00  439.94   37.13  490.51   37.13  352.88  -45.06   32.65  134.94 
1 1 1   14   12   33 0.00  571.54   32.03  570.07   32.03  580.60  159.47  207.21  159.47 
1 1 1   14   12   34 0.00  131.50   70.52  173.51   70.52    6.20   -4.62   86.00   -4.62 
1 1 1   14   12   35 0.00  361.40   53.43  337.81   53.43  440.30 -152.42  141.33 -152.42 
1 1 1   14   12   36 0.00  380.93   65.83  264.88   65.83  254.89 -134.41  222.30   45.59 
1 1 1   14   12   37 0.00   69.80   56.10  102.84   56.10   77.16  100.36  217.25  100.36 
1 1 1   14   12   38 0.00  102.10   51.97   49.94   51.97   15.91   33.22   44.58   33.22 
1 1 1   14   12   39 0.00  203.79   79.61  217.11   79.61  186.71   10.52  124.27 -169.48 
1 1 1   14   12   40 0.00  161.53   82.35  133.04   82.35   72.69   88.95  102.39  -91.05 
1 1 1   14   12   41 0.00  104.36   69.18  122.31   69.18    2.59    6.49  183.38 -173.51 
1 1 1   14   12   42 0.00  109.11   63.93   96.93   63.93   19.86  167.88   44.70  -12.12 
1 1 1   14   12   43 0.00   91.01   60.69  100.00   60.69    4.46   93.25   37.85  -86.75 
1 1 1   14   13    1 0.00 1124.85   14.81 1142.39   14.81  664.29   10.60   56.93   10.60 
1 1 1   14   13    2 0.00 1178.99   14.75 1196.81   14.75  694.11  147.98   45.48  147.98 
1 1 1   14   13    3 0.00  780.53   15.38  790.51   15.38  353.15  166.54  166.14  -13.46 
1 1 1   14   13    4 0.00  794.95   16.10  784.81   16.10  523.29 -135.47  168.97 -135.47 
1 1 1   14   13    5 0.00  525.41   19.13  515.95   19.13  269.13 -170.32   12.52    9.68 
1 1 1   14   13    6 0.00 1634.81   17.54 1603.51   17.54 1044.36 -109.27  180.23 -109.27 
1 1 1   14   13    7 0.00  914.83   18.20  903.03   18.20  567.56  160.24   79.55  160.24 
1 1 1   14   13    8 0.00  220.44   30.01  243.31   30.01    4.03  -47.80   79.95  132.20 
1 1 1   14   13    9 0.00 1115.27   17.79 1119.57   17.79  935.25    4.88  549.37    4.88 
1 1 1   14   13   10 0.00 1283.35   18.58 1274.41   18.58  747.05 -166.64   25.18   13.36 
1 1 1   14   13   11 0.00  584.60   24.56  535.75   24.56  248.77  139.85  136.64  -40.15 
1 1 1   14   13   12 0.00  523.37   36.96  477.13   36.96  327.00   45.85  166.29   45.85 
1 1 1   14   13   13 0.00  868.52   26.52  868.31   26.52  793.05   59.59  605.72   59.59 
1 1 1   14   13   14 0.00  140.90   61.57  166.22   61.57   51.63   35.26  152.01   35.26 
1 1 1   14   13   15 0.00  455.23   31.40  498.90   31.40  292.99  107.99   72.32  107.99 
1 1 1   14   13   16 0.00  704.41   27.49  699.33   27.49  426.93  174.73   10.65   -5.27 
1 1 1   14   13   17 0.00  230.77   65.68  154.30   65.68   73.63  -14.66  289.73  -14.66 
1 1 1   14   13   18 0.00  593.90   32.28  580.40   32.28  422.39  -39.68  166.18  -39.68 
1 1 1   14   13   19 0.00 1182.08   24.54 1185.58   24.54  783.32 -154.17   43.88 -154.17 
1 1 1   14   13   20 0.00 1012.89   25.69 1061.64   25.69  631.87  132.16   87.33  -47.84 
1 1 1   14   13   21 0.00 1150.45   25.84 1179.25   25.84  716.04  161.06  116.52  -18.94 
1 1 1   14   13   22 0.00 1095.23   22.00 1109.10   22.00  758.92  134.12   31.73  134.12 
1 1 1   14   13   23 0.00  534.68   26.30  524.22   26.30  303.24  -56.28   77.50  123.72 
1 1 1   14   13   24 0.00 1022.95   21.82 1052.47   21.82  821.50  -90.97  202.27  -90.97 
1 1 1   14   13   25 0.00  512.88   29.50  443.09   29.50  363.01 -137.01  210.26 -137.01 
1 1 1   14   13   26 1.00   99.48   55.08  119.25   55.08  126.70 -163.56  300.73 -163.56 
1 1 1   14   13   27 0.00  913.87   22.52  850.07   22.52  741.22   63.07  188.55   63.07 
1 1 1   14   13   28 0.00 1049.93   21.10 1093.43   21.10  928.51  -34.57  226.18  -34.57 
1 1 1   14   13   29 0.00  560.53   33.13  484.24   33.13  441.19 -156.62  122.46 -156.62 
1 1 1   14   13   30 1.00  134.40   65.21  243.66   65.21    3.39   16.35  161.86   16.35 
1 1 1   14   13   31 0.00  488.46   34.67  525.97   34.67  442.18 -133.34  109.07 -133.34 
1 1 1   14   13   32 1.00  326.10   46.23  385.65   46.23  220.66 -130.31   94.28   49.69 
1 1 1   14   13   33 0.00  482.62   41.46  366.07   41.46  399.99 -177.51  118.90 -177.51 
1 1 1   14   13   34 0.00  176.31   70.63  107.61   70.63   36.41  168.71  269.35  168.71 
1 1 1   14   13   35 0.00  250.03   72.73  197.15   72.73  185.37 -174.68   69.54 -174.68 
1 1 1   14   13   36 1.00  154.33   73.91  132.61   73.91   23.40   23.09   97.17 -156.91 
1 1 1   14   13   37 0.00   60.00   60.17  124.70   60.17  137.42  -82.02  399.81  -82.02 
1 1 1   14   13   38 0.00  144.98   71.01  109.83   71.01    8.08   32.32   79.69 -147.68 
1 1 1   14   13   39 0.00  352.51   63.21  351.77   63.21  585.58   66.79  278.23   66.79 
1 1 1   14   13   40 1.00  105.33   67.47  112.39   67.47    2.73  151.59   45.31  151.59 
1 1 1   14   13   41 0.00  119.26   65.71   90.54   65.71   16.92  -73.82   64.71  106.18 
1 1 1   14   13   42 0.00   99.57   64.10  108.32   64.10   25.86 -128.79  129.62   51.21 
1 1 1   14   13   43 0.00   93.64   60.82  102.21   60.82    8.37  -26.98  136.24  153.02 
1 1 1   15    1    1 0.00 2220.32   27.37 2220.11   27.37 1162.86  -95.27  206.03   84.73 
1 1 1   15    1    2 0.00  721.96   20.93  711.54   20.93  235.88  -75.41  289.68  104.59 
1 1 1   15    1    3 0.00 1524.76   25.78 1510.53   25.78  773.00  -34.47  153.79  145.53 
1 1 1   15    1    4 0.00 3060.48   33.50 3008.84   33.50 1638.73  -71.57  169.07  108.43 
1 1 1   15    1    5 0.00 2729.20   30.16 2744.42   30.16 1540.67   23.83   23.97 -156.17 
1 1 1   15    1    6 0.00 1413.98   21.57 1392.08   21.57  751.49   54.01   72.80 -125.99 
1 1 1   15    1    7 0.00 1098.24   21.05 1098.50   21.05  606.73  -75.73    9.38  104.27 
1 1 1   15    1    8 1.00 1292.02   18.69 1307.98   18.69  591.17  -98.60  287.97   81.40 
1 1 1   15    1    9 0.00 1354.68   18.34 1358.01   18.34  941.86 -164.57  214.00 -164.57 
1 1 1   15    1   10 0.00 1007.57   18.65 1013.49   18.65  570.72 -145.58   98.35   34.42 
1 1 1   15    1   11 0.00  484.75   18.01  491.25   18.01  231.79  -39.20   59.63  140.80 
1 1 1   15    1   12 0.00  707.20   17.28  681.60   17.28  487.15  -85.43  169.35  -85.43 
1 1 1   15    1   13 0.00 1047.56   18.37 1048.46   18.37  867.85   46.28  422.50   46.28 
1 1 1   15    1   14 0.00  754.04   20.44  795.08   20.44  526.84  -43.38   87.18  -43.38 
1 1 1   15    1   15 0.00  552.20   31.07  472.73   31.07  299.07  166.63   13.31  166.63 
1 1 1   15    1   16 0.00  987.54   20.33  970.99   20.33  736.21   29.34  235.36   29.34 
1 1 1   15    1   17 0.00  400.05   33.85  411.63   33.85  218.17  -41.20   27.89  -41.20 
1 1 1   15    1   18 0.00  712.45   22.93  710.27   22.93  592.03   46.83  311.68   46.83 
1 1 1   15    1   19 0.00 1084.04   20.67 1106.44   20.67  548.17  176.94  364.29   -3.06 
1 1 1   15    1   20 0.00  410.62   28.83  412.29   28.83  237.81 -167.97   77.46 -167.97 
1 1 1   15    1   21 0.00  267.77   45.13  248.07   45.13   25.80 -129.78  309.53 -129.78 
1 1 1   15    1   22 0.00  330.07   34.63  319.40   34.63  111.39 -161.11  102.71   18.89 
1 1 1   15    1   23 0.00  896.75   19.20  943.47   19.20  652.69 -110.23   62.95 -110.23 
1 1 1   15    1   24 0.00  976.09   19.85  972.18   19.85  752.15  102.37  164.92  102.37 
1 1 1   15    1   25 0.00   73.94   52.79   97.97   52.79   99.11  -64.89  219.63  -64.89 
1 1 1   15    1   26 0.00  174.20   60.58  223.19   60.58   14.10 -139.15  138.00 -139.15 
1 1 1   15    1   27 0.00  286.31   44.33  356.16   44.33   96.19  178.79   18.30  178.79 
1 1 1   15    1   28 1.00  356.65   42.95  331.52   42.95  179.08   23.76   13.52 -156.24 
1 1 1   15    1   29 0.00  841.68   23.07  833.87   23.07  749.48  128.82  234.83  128.82 
1 1 1   15    1   30 1.00  172.15   72.77  140.56   72.77   92.00  168.39  312.45  168.39 
1 1 1   15    1   31 0.00  316.93   49.56  368.65   49.56  178.53  146.14  125.11  -33.86 
1 1 1   15    1   32 0.00  107.37   79.23  231.62   79.23   13.43  -23.18  136.31  -23.18 
1 1 1   15    1   33 0.00  382.80   53.40  374.93   53.40  251.60  -46.11   72.91  133.89 
1 1 1   15    1   34 0.00  319.14   59.28  391.64   59.28  288.55  -99.37   61.38  -99.37 
1 1 1   15    1   35 0.00  264.52   78.20  224.29   78.20  131.79  -76.19   41.78  103.81 
1 1 1   15    1   36 1.00  197.70   84.62  231.41   84.62  126.94  140.50   16.34  140.50 
1 1 1   15    1   37 0.00  173.08   85.02  249.78   85.02  175.09   36.83   41.12   36.83 
1 1 1   15    1   38 0.00  201.10   89.97  192.09   89.97  132.13   34.14  100.11 -145.86 
1 1 1   15    1   39 0.00  205.92   84.78  226.32   84.78  152.67   23.11  175.05 -156.89 
1 1 1   15    1   40 1.00  106.50   61.81   86.40   61.81   65.89   70.56  251.63   70.56 
1 1 1   15    1   41 0.00  101.06   62.19   97.51   62.19   17.28 -116.06   86.85 -116.06 
1 1 1   15    1   42 0.00   97.78   63.82  103.86   63.82   11.33   90.68  123.31   90.68 
1 1 1   15    1   43 0.00   99.14   63.95  106.73   63.95   20.85   78.41   49.02 -101.59 
1 1 1   15    1   44 0.00  102.48   62.00   98.67   62.00   14.92  -90.38   51.40   89.62 
1 1 1   15    2    1 0.00  448.65   23.33  427.44   23.33   87.65  -62.92  204.25  117.08 
1 1 1   15    2    2 0.00 1263.07   24.01 1234.45   24.01  637.79  156.58  101.09  -23.42 
1 1 1   15    2    3 0.00 2469.50   30.57 2422.18   30.57 1472.82 -171.28  199.23 -171.28 
1 1 1   15    2    4 0.00  341.41   21.57  303.58   21.57   17.88  -90.54  231.28   89.46 
1 1 1   15    2    5 0.00 1477.33   22.72 1481.34   22.72  706.06  -69.63  241.91  110.37 
1 1 1   15    2    6 0.00 1656.46   21.26 1665.40   21.26 1024.99  -72.41  188.60  -72.41 
1 1 1   15    2    7 0.00 1176.27   19.26 1152.05   19.26  513.52  -35.30  273.51  144.70 
1 1 1   15    2    8 0.00  612.00   16.77  637.27   16.77  204.72  133.32  319.92  -46.68 
1 1 1   15    2    9 0.00 2486.65   21.96 2506.78   21.96 1773.62  177.47  435.82  177.47 
1 1 1   15    2   10 0.00  813.64   17.07  787.42   17.07  556.50   94.29  170.32   94.29 
1 1 1   15    2   11 0.00  449.57   19.27  441.77   19.27  211.23 -111.76   49.23 -111.76 
1 1 1   15    2   12 0.00  292.50   23.87  260.06   23.87   42.75   95.48  122.05  -84.52 
1 1 1   15    2   13 0.00  560.53   20.09  543.38   20.09  390.61  -76.42  164.08  -76.42 
1 1 1   15    2   14 0.00 1120.13   19.63 1099.16   19.63  846.55 -156.96  274.85 -156.96 
1 1 1   15    2   15 1.00 1301.98   23.97 1266.80   23.97  946.16   34.10  263.70   34.10 
1 1 1   15    2   16 0.00 1368.40   21.13 1344.39   21.13  879.11  -54.06    9.09  -54.06 
1 1 1   15    2   17 0.00  312.80   33.52  348.41   33.52   81.45  125.00  184.99  -55.00 
1 1 1   15    2   18 0.00  342.42   33.70  417.16   33.70  111.81  133.23  213.92  -46.77 
1 1 1   15    2   19 1.00  715.83   24.69  736.19   24.69  639.43  177.04  380.94  177.04 
1 1 1   15    2   20 0.00 1574.28   19.49 1651.02   19.49 1055.84   15.93   91.43 -164.07 
1 1 1   15    2   21 0.00  259.17   39.01  334.17   39.01   28.11   -4.64  261.98  175.36 
1 1 1   15    2   22 0.00 1032.95   18.78 1041.87   18.78  800.62 -175.63  214.26 -175.63 
1 1 1   15    2   23 0.00  898.84   20.64  946.30   20.64  715.62   37.58  185.14   37.58 
1 1 1   15    2   24 0.00  231.95   50.73  281.80   50.73   34.48   97.66  148.87  -82.34 
1 1 1   15    2   25 0.00  242.33   52.18  271.83   52.18   48.97  134.88  108.09  -45.12 
1 1 1   15    2   26 0.00  529.89   28.22  525.46   28.22  279.60    1.99  165.78 -178.01 
1 1 1   15    2   27 0.00 1268.20   19.32 1202.86   19.32  943.15  -91.47   55.51  -91.47 
1 1 1   15    2   28 0.00  680.68   25.54  684.73   25.54  573.49  106.81  157.03  106.81 
1 1 1   15    2   29 0.00  520.76   33.85  498.04   33.85  304.45  -95.33  133.81   84.67 
1 1 1   15    2   30 0.00   98.73   68.77  303.81   68.77    7.24   79.16  177.32 -100.84 
1 1 1   15    2   31 0.00 1123.99   22.21 1101.43   22.21 1297.62  -94.65  796.04  -94.65 
1 1 1   15    2   32 0.00  274.29   60.25  324.00   60.25  165.16   43.91   37.51 -136.09 
1 1 1   15    2   33 0.00  259.18   75.73  177.42   75.73   21.88 -167.44   27.34   12.56 
1 1 1   15    2   34 0.00  230.32   80.41  173.72   80.41   26.95  -70.29  126.16  109.71 
1 1 1   15    2   35 0.00  145.33   71.83   94.76   71.83    8.70   33.55   30.82   33.55 
1 1 1   15    2   36 0.00  156.03   81.11  275.97   81.11  156.14   50.75    4.81 -129.25 
1 1 1   15    2   37 0.00  246.76   72.52  366.53   72.52  404.43   -2.95  159.00   -2.95 
1 1 1   15    2   38 0.00   94.54   62.81  104.08   62.81  113.26  170.47  351.39  170.47 
1 1 1   15    2   39 0.00  117.51   74.26  131.64   74.26    1.38  122.76   36.53  122.76 
1 1 1   15    2   40 0.00  140.44   81.14  171.85   81.14   86.46 -172.02   53.96    7.98 
1 1 1   15    2   41 0.00  130.54   74.56  133.67   74.56   10.73   81.09   20.45  -98.91 
1 1 1   15    2   42 0.00  110.50   69.58  111.97   69.58    6.25 -177.30   38.63    2.70 
1 1 1   15    2   43 0.00  100.93   62.41   96.85   62.41   11.56  175.29  148.96   -4.71 
1 1 1   15    2   44 0.00   87.93   57.98   95.89   57.98    0.67  161.58   97.10  -18.42 
1 1 1   15    3    1 0.00 1615.05   26.35 1609.36   26.35  982.03  138.33  182.20  138.33 
1 1 1   15    3    2 0.00 2054.68   29.26 2058.87   29.26 1196.51  139.89  105.62  139.89 
1 1 1   15    3    3 0.00  700.76   19.50  715.26   19.50  310.77  139.34  126.56  -40.66 
1 1 1   15    3    4 0.00 1710.25   25.34 1690.35   25.34  859.04  -96.60  173.98   83.40 
1 1 1   15    3    5 0.00  713.73   17.69  723.25   17.69  356.69   43.57   43.60 -136.43 
1 1 1   15    3    6 0.00  474.48   19.17  408.18   19.17  184.19  -97.87   32.09  -97.87 
1 1 1   15    3    7 0.00  615.27   17.64  622.30   17.64   99.64   24.35   79.37   24.35 
1 1 1   15    3    8 0.00 1925.51   20.67 1921.28   20.67 1182.57  170.55    2.75   -9.45 
1 1 1   15    3    9 0.00  452.37   18.54  458.88   18.54  166.98  -18.16  148.21  161.84 
1 1 1   15    3   10 0.00 1625.04   19.98 1630.79   19.98 1054.67   52.50   83.30   52.50 
1 1 1   15    3   11 0.00 1145.76   17.64 1148.30   17.64  794.94   -4.02  173.08   -4.02 
1 1 1   15    3   12 0.00  383.40   21.32  397.90   21.32  151.82  174.56  112.60   -5.44 
1 1 1   15    3   13 0.00  678.49   20.70  668.64   20.70  510.27   70.81  221.18   70.81 
1 1 1   15    3   14 0.00  823.82   20.41  804.03   20.41  575.97  -43.07  132.71  -43.07 
1 1 1   15    3   15 0.00  409.15   27.24  433.27   27.24  221.34  -38.80    8.57  -38.80 
1 1 1   15    3   16 0.00  393.27   27.35  394.48   27.35  202.10  153.19   27.01  153.19 
1 1 1   15    3   17 0.00  402.28   28.12  398.52   28.12  197.96  142.45   30.52  -37.55 
1 1 1   15    3   18 0.00  716.39   25.54  748.69   25.54  396.98  -95.58  149.67   84.42 
1 1 1   15    3   19 0.00  468.81   27.48  483.93   27.48  290.94   27.57   21.94   27.57 
1 1 1   15    3   20 0.00 1209.63   21.24 1210.03   21.24  890.94  -57.80  140.98  -57.80 
1 1 1   15    3   21 0.00 1188.70   19.07 1168.92   19.07  700.78 -154.15  171.18   25.85 
1 1 1   15    3   22 0.00 1204.29   19.33 1212.37   19.33  979.80  -71.44  329.96  -71.44 
1 1 1   15    3   23 0.00 1177.18   18.66 1168.98   18.66  799.84   46.21   15.35 -133.79 
1 1 1   15    3   24 0.00  775.16   21.35  815.39   21.35  596.15  146.42  106.37  146.42 
1 1 1   15    3   25 0.00 1001.33   20.14  999.96   20.14  698.31  -94.11   24.60   85.89 
1 1 1   15    3   26 0.00 1602.17   17.50 1593.75   17.50 1207.25 -113.12   71.21 -113.12 
1 1 1   15    3   27 0.00  402.83   42.93  344.80   42.93  126.51    9.23  237.64 -170.77 
1 1 1   15    3   28 0.00  435.35   39.00  381.33   39.00  266.36  172.66   14.89  172.66 
1 1 1   15    3   29 0.00  556.63   30.26  587.83   30.26  418.81   79.90    6.07 -100.10 
1 1 1   15    3   30 1.00  640.04   28.43  716.60   28.43  601.34 -164.51  155.93 -164.51 
1 1 1   15    3   31 0.00  383.58   44.62  398.76   44.62  181.32  -71.54  229.62  108.46 
1 1 1   15    3   32 0.00  455.06   39.76  471.12   39.76  322.25  162.26   87.86  -17.74 
1 1 1   15    3   33 0.00  299.16   65.88  274.27   65.88   94.88  -20.30  224.07  159.70 
1 1 1   15    3   34 0.00  131.28   71.91  131.17   71.91  119.28  152.26  354.41  152.26 
1 1 1   15    3   35 0.00  122.39   74.49  141.61   74.49   17.98    5.02   77.41    5.02 
1 1 1   15    3   36 0.00  279.44   85.72  133.83   85.72  122.28   40.24   18.97   40.24 
1 1 1   15    3   37 0.00  211.04   83.31  313.52   83.31  252.38  -63.47   64.30  116.53 
1 1 1   15    3   38 0.00  298.15   81.74  266.13   81.74  367.61 -160.19  140.20 -160.19 
1 1 1   15    3   39 0.00  161.77   70.87   73.69   70.87    6.12 -112.42   99.10 -112.42 
1 1 1   15    3   40 0.00   97.09   65.50  113.92   65.50   16.17 -177.69  111.30 -177.69 
1 1 1   15    3   41 0.00  167.98   82.26  138.93   82.26   88.86   60.43   89.16 -119.57 
1 1 1   15    3   42 0.00   94.63   61.69   97.30   61.69   31.88  -25.74  184.37  -25.74 
1 1 1   15    3   43 0.00   97.99   59.51   87.92   59.51    1.41   72.52   13.36 -107.48 
1 1 1   15    3   44 0.00   86.42   54.09   82.64   54.09    6.10  131.30   56.14  131.30 
1 1 1   15    4    1 0.00 3340.04   37.55 3358.78   37.55 2015.38   63.05  298.24   63.05 
1 1 1   15    4    2 0.00 1195.17   21.20 1170.68   21.20  667.82   20.10   47.84   20.10 
1 1 1   15    4    3 0.00 1738.53   21.98 1725.75   21.98 1108.75  126.56  309.50  126.56 
1 1 1   15    4    4 0.00 1399.61   21.43 1358.87   21.43  758.03  107.08    1.35  107.08 
1 1 1   15    4    5 0.00 1525.73   21.72 1534.67   21.72  896.96 -161.70  104.64 -161.70 
1 1 1   15    4    6 0.00 1499.05   19.66 1487.60   19.66  709.50  -56.48  239.99  123.52 
1 1 1   15    4    7 0.00 1131.97   19.59 1154.93   19.59  697.96   62.73  139.31   62.73 
1 1 1   15    4    8 0.00  480.23   18.52  489.81   18.52  237.16  178.32   17.53   -1.68 
1 1 1   15    4    9 0.00 1103.48   17.63 1103.84   17.63  702.16   51.02   67.03   51.02 
1 1 1   15    4   10 0.00  878.73   17.44  863.19   17.44  593.84   -6.72  150.32   -6.72 
1 1 1   15    4   11 0.00  436.14   19.18  414.32   19.18  141.55  -42.03  160.91  137.97 
1 1 1   15    4   12 0.00 1374.38   19.93 1363.60   19.93  898.36  147.45   64.55  147.45 
1 1 1   15    4   13 0.00  382.43   26.77  422.71   26.77  156.50  134.52  129.77  -45.48 
1 1 1   15    4   14 0.00  820.24   20.32  861.98   20.32  774.46 -112.76  539.46 -112.76 
1 1 1   15    4   15 0.00  613.74   22.52  651.57   22.52  283.42   58.51  208.14 -121.49 
1 1 1   15    4   16 0.00  457.41   26.35  482.73   26.35  164.69 -156.08  232.12   23.92 
1 1 1   15    4   17 0.00  937.03   20.15  921.40   20.15  563.04  167.70   72.70  -12.30 
1 1 1   15    4   18 0.00  636.01   23.09  621.63   23.09  518.77   10.84  295.83   10.84 
1 1 1   15    4   19 0.00 1566.44   18.68 1579.48   18.68 1209.37 -111.58  298.79 -111.58 
1 1 1   15    4   20 0.00 1119.87   19.84 1125.75   19.84  868.43  149.37  218.62  149.37 
1 1 1   15    4   21 0.00 1120.87   20.94 1134.18   20.94  849.41  170.70  201.40  170.70 
1 1 1   15    4   22 0.00  310.71   34.87  391.24   34.87   79.51   34.86  253.19 -145.14 
1 1 1   15    4   23 0.00  776.13   22.76  765.37   22.76  585.95  -50.95  140.88  -50.95 
1 1 1   15    4   24 0.00 1306.50   18.46 1308.69   18.46 1081.32 -109.39  325.60 -109.39 
1 1 1   15    4   25 0.00  528.84   26.84  609.57   26.84  335.77  -23.15  104.71  156.85 
1 1 1   15    4   26 0.00  926.46   21.86  970.23   21.86  727.70  111.53   85.93  111.53 
1 1 1   15    4   27 0.00  538.39   30.88  538.09   30.88  367.57  119.86   11.38  -60.14 
1 1 1   15    4   28 0.00  272.90   60.29  256.16   60.29   38.14 -164.55   25.21   15.45 
1 1 1   15    4   29 0.00  313.50   51.14  303.51   51.14   91.74  160.89  207.25  -19.11 
1 1 1   15    4   30 0.00  198.19   74.53  186.12   74.53   12.66   99.40  163.53   99.40 
1 1 1   15    4   31 0.00  277.27   53.81  416.80   53.81  212.01   82.20   59.03  -97.80 
1 1 1   15    4   32 0.00  270.69   58.05  393.62   58.05  163.08 -121.65  162.84   58.35 
1 1 1   15    4   33 0.00  146.30   69.68   96.42   69.68  142.28 -165.16  381.00 -165.16 
1 1 1   15    4   34 0.00  154.12   72.61  105.27   72.61   26.53  178.70   87.47  178.70 
1 1 1   15    4   35 0.00  217.93   76.05  251.32   76.05  115.60 -120.67   61.56   59.33 
1 1 1   15    4   36 0.00  244.57   82.91   98.13   82.91   69.44 -149.80   63.92   30.20 
1 1 1   15    4   37 0.00  278.33   80.16  294.40   80.16  300.04  168.68   38.87  -11.32 
1 1 1   15    4   38 0.00  169.33   83.59  178.09   83.59   83.89   67.91  116.95 -112.09 
1 1 1   15    4   39 0.00  194.28   87.27  197.63   87.27  109.64   14.15   19.02   14.15 
1 1 1   15    4   40 0.00   96.13   62.19  104.55   62.19   23.42  164.67  117.55  164.67 
1 1 1   15    4   41 0.00  133.92   79.18  128.19   79.18   22.57  -50.12   55.60  129.88 
1 1 1   15    4   42 0.00  105.52   62.67   88.48   62.67   20.56   80.43  144.47   80.43 
1 1 1   15    4   43 0.00  100.07   64.59  106.40   64.59   11.61 -157.70   22.54   22.30 
1 1 1   15    4   44 0.00   82.05   53.24   83.70   53.24   19.28 -111.07  121.18 -111.07 
1 1 1   15    5    1 0.00 1372.00   22.31 1388.25   22.31  577.09  -49.23  354.53  130.77 
1 1 1   15    5    2 0.00 2172.17   22.26 2084.84   22.26 1251.43  -12.22  162.89  -12.22 
1 1 1   15    5    3 0.00  775.97   18.76  785.38   18.76  376.20   39.77   67.71 -140.23 
1 1 1   15    5    4 0.00  553.81   18.74  562.00   18.74  289.73   58.87   49.88   58.87 
1 1 1   15    5    5 0.00 1367.56   20.20 1391.37   20.20  589.90  -16.88  336.92  163.12 
1 1 1   15    5    6 0.00  723.82   17.57  748.99   17.57  502.56    6.59  273.75    6.59 
1 1 1   15    5    7 0.00 1332.61   20.63 1317.81   20.63  951.81  140.82  317.53  140.82 
1 1 1   15    5    8 0.00   83.00   37.22   79.74   37.22   61.19 -175.92  129.45 -175.92 
1 1 1   15    5    9 0.00  775.35   17.27  773.06   17.27  503.09 -155.14  107.40 -155.14 
1 1 1   15    5   10 1.00  592.66   18.34  598.50   18.34  323.44  -47.41   24.12  132.59 
1 1 1   15    5   11 0.00  565.99   20.21  572.79   20.21  350.09  158.43   84.49  158.43 
1 1 1   15    5   12 0.00 1009.30   21.07 1005.18   21.07  592.12   90.89   76.17  -89.11 
1 1 1   15    5   13 1.00 1432.91   20.74 1420.02   20.74  930.38   25.06   35.47   25.06 
1 1 1   15    5   14 0.00  550.11   24.28  547.41   24.28  279.78 -106.36   83.55   73.64 
1 1 1   15    5   15 0.00  796.13   20.10  861.27   20.10  534.07  128.19   39.48  128.19 
1 1 1   15    5   16 1.00  153.02   45.48  137.62   45.48   96.99  115.96  263.21  115.96 
1 1 1   15    5   17 0.00  353.29   28.17  384.70   28.17  127.61   13.06  149.82 -166.94 
1 1 1   15    5   18 0.00  722.81   20.55  715.23   20.55  429.23 -161.10   63.88   18.90 
1 1 1   15    5   19 1.00 1314.82   19.53 1309.56   19.53  851.09  144.74   63.58  -35.26 
1 1 1   15    5   20 0.00  815.69   21.92  801.83   21.92  647.35   73.79  230.45   73.79 
1 1 1   15    5   21 0.00  904.73   22.59  969.39   22.59  376.50  -85.85  495.71   94.15 
1 1 1   15    5   22 0.00  810.29   22.08  878.55   22.08  526.37   20.16   76.80 -159.84 
1 1 1   15    5   23 0.00  330.34   35.75  396.77   35.75  145.98  -50.75  129.23  129.25 
1 1 1   15    5   24 0.00 1043.81   19.35 1099.35   19.35  974.09  156.95  460.24  156.95 
1 1 1   15    5   25 0.00  778.31   22.60  816.90   22.60  713.42   84.87  322.48   84.87 
1 1 1   15    5   26 0.00  879.53   21.23  965.56   21.23  620.18  166.55   97.54  -13.45 
1 1 1   15    5   27 0.00  355.55   40.93  383.06   40.93   53.10  -21.38  395.11  158.62 
1 1 1   15    5   28 1.00  721.55   25.97  769.36   25.97  522.85  107.84   70.96  -72.16 
1 1 1   15    5   29 0.00  491.72   36.91  504.34   36.91  254.97   -6.38  228.02  173.62 
1 1 1   15    5   30 0.00  544.87   32.33  550.54   32.33  401.68  131.64   35.00  -48.36 
1 1 1   15    5   31 0.00  513.57   36.97  449.92   36.97  343.69 -167.70   60.62   12.30 
1 1 1   15    5   32 0.00   85.31   57.61   94.61   57.61   42.21   77.29   98.05   77.29 
1 1 1   15    5   33 1.00  123.77   66.68  107.76   66.68  108.67  -52.47  283.95  -52.47 
1 1 1   15    5   34 0.00  342.14   51.07  397.67   51.07  230.56 -138.88  147.93   41.12 
1 1 1   15    5   35 0.00  337.55   65.19  298.67   65.19  254.15  169.13    0.89  -10.87 
1 1 1   15    5   36 0.00  100.03   70.68  151.87   70.68   61.42  -31.56  283.91  -31.56 
1 1 1   15    5   37 0.00  185.90   86.98  235.18   86.98  135.78   11.90   50.08   11.90 
1 1 1   15    5   38 1.00  194.61   85.81  253.58   85.81  202.82   -4.69   58.45  175.31 
1 1 1   15    5   39 0.00  193.45   85.91  281.09   85.91  293.06  -33.89   89.04  -33.89 
1 1 1   15    5   40 0.00  225.08   89.84  252.02   89.84  284.05  -67.16   36.81  112.84 
1 1 1   15    5   41 0.00  111.22   75.72  136.66   75.72   18.00 -168.80   97.80   11.20 
1 1 1   15    5   42 0.00  116.96   69.13  104.32   69.13    3.77  103.79  155.14  -76.21 
1 1 1   15    5   43 0.00  107.45   67.02  110.93   67.02   24.12   43.39   25.83 -136.61 
1 1 1   15    5   44 0.00   90.05   56.43   88.07   56.43    2.96 -116.24   66.78 -116.24 
1 1 1   15    6    1 0.00 1584.57   20.15 1574.04   20.15  735.96 -151.25  245.37   28.75 
1 1 1   15    6    2 0.00 1212.51   21.25 1212.05   21.25  688.87   42.96   75.88   42.96 
1 1 1   15    6    3 0.00 1723.51   21.63 1684.92   21.63  911.62 -114.81   34.18   65.19 
1 1 1   15    6    4 0.00 1105.49   19.55 1131.64   19.55  504.10   30.77  200.11 -149.23 
1 1 1   15    6    5 0.00  510.77   17.82  507.83   17.82   35.10 -163.64  453.17   16.36 
1 1 1   15    6    6 0.00 1013.60   17.03 1024.98   17.03  632.40 -123.82   70.51 -123.82 
1 1 1   15    6    7 0.00 1836.76   19.56 1813.38   19.56 1352.57 -110.60  504.02 -110.60 
1 1 1   15    6    8 0.00  637.86   18.23  662.15   18.23  332.65  -43.11   72.45  136.89 
1 1 1   15    6    9 0.00  977.80   16.98  988.41   16.98  520.34  -31.14  142.11  148.86 
1 1 1   15    6   10 0.00  828.13   18.56  844.43   18.56  407.16   64.56  190.89 -115.44 
1 1 1   15    6   11 0.00  807.94   20.39  746.74   20.39  494.36  -26.39   49.77  -26.39 
1 1 1   15    6   12 0.00 1245.09   21.86 1210.41   21.86  705.32   14.54  136.44 -165.46 
1 1 1   15    6   13 0.00  544.86   20.72  544.37   20.72  378.36  -89.51  149.62  -89.51 
1 1 1   15    6   14 0.00 1040.89   23.20 1033.69   23.20  768.25   20.00  252.90   20.00 
1 1 1   15    6   15 0.00  786.48   19.77  832.52   19.77  589.88   -6.40  184.50   -6.40 
1 1 1   15    6   16 0.00  554.92   21.17  584.56   21.17  269.73   67.73  156.51 -112.27 
1 1 1   15    6   17 0.00  221.71   44.92  139.87   44.92   26.16   56.41  113.24   56.41 
1 1 1   15    6   18 0.00  778.86   20.13  773.52   20.13  477.93  122.43   46.15  -57.57 
1 1 1   15    6   19 0.00 1237.09   18.61 1257.62   18.61  917.62   11.24  163.06   11.24 
1 1 1   15    6   20 0.00  612.06   21.86  655.75   21.86  324.93  122.11  152.71  -57.89 
1 1 1   15    6   21 0.00  338.31   43.79  307.13   43.79   25.30  -78.83  320.75  101.17 
1 1 1   15    6   22 0.00  718.68   23.76  746.09   23.76  576.59  124.28  200.98  124.28 
1 1 1   15    6   23 0.00  720.29   22.75  785.53   22.75  335.41  -50.37  355.43  129.63 
1 1 1   15    6   24 0.00  607.46   25.87  643.04   25.87  428.63   45.72   15.68   45.72 
1 1 1   15    6   25 0.00 1094.36   19.33 1147.98   19.33  982.62   60.34  365.80   60.34 
1 1 1   15    6   26 0.00  366.72   39.54  371.74   39.54  173.71   70.77  104.70 -109.23 
1 1 1   15    6   27 0.00  617.50   27.43  677.05   27.43  551.66   19.58  189.41   19.58 
1 1 1   15    6   28 0.00  111.88   65.35  128.85   65.35  152.01  127.90  374.80  127.90 
1 1 1   15    6   29 0.00  225.77   60.36  299.31   60.36   47.61   35.53  192.70 -144.47 
1 1 1   15    6   30 0.00  664.60   27.99  769.95   27.99  641.98  146.32  160.33  146.32 
1 1 1   15    6   31 0.00  693.22   28.03  745.69   28.03  610.24   58.96   52.92   58.96 
1 1 1   15    6   32 0.00  628.91   30.03  692.78   30.03  544.34  137.30   10.93  -42.70 
1 1 1   15    6   33 0.00  604.62   33.92  607.91   33.92  460.06 -164.12  116.43   15.88 
1 1 1   15    6   34 0.00  204.15   77.67  171.82   77.67   15.93  145.95  237.57  145.95 
1 1 1   15    6   35 1.00  151.30   77.07  145.80   77.07   14.64   -7.79  113.36   -7.79 
1 1 1   15    6   36 0.00  134.90   80.47  248.55   80.47   95.85   80.16  173.72  -99.84 
1 1 1   15    6   37 1.00  136.42   76.01  147.37   76.01    4.29  -60.00  204.54  120.00 
1 1 1   15    6   38 0.00  392.11   73.66  331.89   73.66  488.91  -70.83   96.44  -70.83 
1 1 1   15    6   39 0.00  155.03   83.86  215.84   83.86  103.34 -160.12   21.57 -160.12 
1 1 1   15    6   40 0.00  123.83   72.26  124.51   72.26   12.65  162.64   94.89  -17.36 
1 1 1   15    6   41 0.00  127.09   74.52  113.74   74.52   69.06  -41.85  405.47  -41.85 
1 1 1   15    6   42 0.00  131.10   76.90  128.72   76.90   57.02 -148.58  117.91   31.42 
1 1 1   15    6   43 0.00  100.91   62.38   97.47   62.38   16.95  -37.25  123.67  142.75 
1 1 1   15    6   44 0.00   83.13   51.82   77.18   51.82   23.48  156.12  122.55  156.12 
1 1 1   15    7    1 0.00  907.99   19.46  927.27   19.46  475.80  -52.34   10.42  127.66 
1 1 1   15    7    2 0.00 1066.67   18.43 1093.23   18.43  615.67  -88.26   87.53  -88.26 
1 1 1   15    7    3 0.00  612.18   17.14  610.19   17.14  315.87  -79.76   34.82  -79.76 
1 1 1   15    7    4 0.00  706.63   18.65  693.89   18.65  276.19  -14.12  173.44  165.88 
1 1 1   15    7    5 0.00 1141.14   17.75 1187.10   17.75  658.64  -84.03   48.40   95.97 
1 1 1   15    7    6 0.00  851.27   18.80  847.84   18.80  412.92   60.61  159.45 -119.39 
1 1 1   15    7    7 0.00 1437.83   20.20 1383.99   20.20  739.89 -172.58  212.76    7.42 
1 1 1   15    7    8 0.00  647.46   19.37  645.83   19.37  432.00   90.74  169.31   90.74 
1 1 1   15    7    9 0.00  190.11   34.33  191.94   34.33   80.70 -115.83  251.71 -115.83 
1 1 1   15    7   10 0.00 1183.02   18.10 1194.69   18.10  709.24 -158.95   33.89   21.05 
1 1 1   15    7   11 0.00  211.58   32.91  244.59   32.91   73.36 -175.28  350.03 -175.28 
1 1 1   15    7   12 0.00  868.17   20.43  888.62   20.43  584.94 -137.57   88.89 -137.57 
1 1 1   15    7   13 0.00 1233.30   20.12 1284.51   20.12  826.12  -66.99   95.18  -66.99 
1 1 1   15    7   14 0.00  602.95   23.20  632.05   23.20  416.67  -60.84  116.38  -60.84 
1 1 1   15    7   15 0.00  980.63   19.46  998.54   19.46  743.04  -71.62  250.64  -71.62 
1 1 1   15    7   16 0.00 1255.44   20.04 1328.39   20.04 1035.66  -65.60  416.41  -65.60 
1 1 1   15    7   17 0.00  224.04   31.73  254.11   31.73   94.02  163.90  433.23  163.90 
1 1 1   15    7   18 0.00 1358.27   19.14 1419.24   19.14  967.60   51.27   94.25   51.27 
1 1 1   15    7   19 0.00  821.66   20.10  891.96   20.10  730.06  130.82  351.57  130.82 
1 1 1   15    7   20 0.00  453.55   26.46  460.83   26.46  274.26  157.75   28.63  157.75 
1 1 1   15    7   21 1.00  541.09   24.44  552.99   24.44  292.53  -50.63  102.69  129.37 
1 1 1   15    7   22 0.00  255.29   49.55  205.91   49.55   17.06  -52.76  235.33  -52.76 
1 1 1   15    7   23 1.00  847.37   22.54  891.28   22.54  679.21  -10.03  181.31  -10.03 
1 1 1   15    7   24 0.00  201.35   60.13  165.78   60.13   91.33   73.91  342.45   73.91 
1 1 1   15    7   25 0.00  707.89   24.65  712.76   24.65  546.86 -107.91  109.36 -107.91 
1 1 1   15    7   26 0.00  687.73   25.12  687.72   25.12  619.23   12.74  290.79   12.74 
1 1 1   15    7   27 0.00  570.63   29.75  546.00   29.75  313.46   -3.65  172.27  176.35 
1 1 1   15    7   28 0.00  837.80   23.11  891.38   23.11  560.76  124.23  194.02  -55.77 
1 1 1   15    7   29 0.00  588.37   30.89  581.50   30.89  435.96  172.74    0.75   -7.26 
1 1 1   15    7   30 0.00   75.76   66.60  187.87   66.60  115.13  142.41  334.60  142.41 
1 1 1   15    7   31 0.00  499.09   36.40  493.24   36.40  350.61   76.56   76.82 -103.44 
1 1 1   15    7   32 0.00  579.84   33.33  562.47   33.33  505.37 -119.77   80.25 -119.77 
1 1 1   15    7   33 1.00  271.49   68.42  169.68   68.42   39.10 -131.16   50.96   48.84 
1 1 1   15    7   34 0.00  365.92   60.71  251.51   60.71  208.48  152.49   21.17  -27.51 
1 1 1   15    7   35 0.00   97.53   66.68  132.80   66.68   50.42  -28.12  193.26  -28.12 
1 1 1   15    7   36 0.00  262.17   65.46  330.56   65.46  349.39  -88.22   68.98  -88.22 
1 1 1   15    7   37 0.00  305.10   64.67  385.92   64.67  395.92 -109.94   19.36   70.06 
1 1 1   15    7   38 0.00  149.75   74.99  119.17   74.99    7.58   23.40   63.30 -156.60 
1 1 1   15    7   39 0.00  239.53   88.85  271.36   88.85  293.30  169.76   33.39  -10.24 
1 1 1   15    7   40 0.00  203.22   84.78  134.85   84.78   97.95   18.19    8.85   18.19 
1 1 1   15    7   41 0.00  126.96   76.37  119.68   76.37   14.35  166.18  134.93  -13.82 
1 1 1   15    7   42 0.00   92.03   63.12  105.02   63.12    0.86  165.63  145.10  165.63 
1 1 1   15    7   43 0.00   94.18   59.74   93.22   59.74    0.98   98.91    7.85  -81.09 
1 1 1   15    7   44 0.00   82.18   51.94   78.83   51.94   33.53   74.52  168.47   74.52 
1 1 1   15    8    1 1.00 1466.34   17.94 1487.39   17.94  863.61   -1.47  152.32   -1.47 
1 1 1   15    8    2 0.00  625.72   16.59  632.28   16.59  171.25  -99.42  299.50   80.58 
1 1 1   15    8    3 0.00  743.80   16.93  758.95   16.93  324.03 -102.39  198.08   77.61 
1 1 1   15    8    4 0.00  448.43   18.42  449.80   18.42  186.82  -73.98   68.05  -73.98 
1 1 1   15    8    5 0.00  475.11   18.40  494.15   18.40  245.07   63.84   41.28   63.84 
1 1 1   15    8    6 0.00 1885.74   20.88 1876.50   20.88 1261.81  144.47  282.46  144.47 
1 1 1   15    8    7 0.00 1091.84   18.63 1083.70   18.63  762.54  -73.35  252.41  -73.35 
1 1 1   15    8    8 0.00  660.79   21.02  667.06   21.02  360.85   19.47   25.93 -160.53 
1 1 1   15    8    9 0.00  680.74   20.59  668.36   20.59  443.63 -163.15  139.35 -163.15 
1 1 1   15    8   10 0.00  653.63   19.69  623.62   19.69  458.92   38.64  198.73   38.64 
1 1 1   15    8   11 0.00  625.58   20.37  630.65   20.37  464.60  127.33  223.48  127.33 
1 1 1   15    8   12 1.00 1843.18   19.37 1902.92   19.37 1281.27  -95.70  194.00  -95.70 
1 1 1   15    8   13 0.00 1087.95   21.53 1169.65   21.53  865.32  -79.49  351.57  -79.49 
1 1 1   15    8   14 0.00 1118.92   23.06 1118.63   23.06  794.16 -112.34  200.16 -112.34 
1 1 1   15    8   15 0.00  746.28   20.47  786.33   20.47  398.39   40.23  153.32 -139.77 
1 1 1   15    8   16 0.00  430.40   22.79  424.91   22.79  162.59 -120.51  166.95   59.49 
1 1 1   15    8   17 0.00  950.86   19.01  988.76   19.01  621.16  114.16    6.63  -65.84 
1 1 1   15    8   18 0.00  274.17   34.16  274.83   34.16   35.65  175.59  174.09   -4.41 
1 1 1   15    8   19 0.00  206.39   45.46  162.82   45.46   55.05  -12.78  217.08  -12.78 
1 1 1   15    8   20 0.00 1250.27   18.54 1272.39   18.54 1025.03   95.60  398.62   95.60 
1 1 1   15    8   21 0.00  868.11   20.93  902.12   20.93  685.85 -108.73  216.27 -108.73 
1 1 1   15    8   22 0.00  448.99   27.68  474.11   27.68  134.69  -71.88  318.98  108.12 
1 1 1   15    8   23 0.00  213.90   54.87  181.79   54.87    9.68   45.78   82.18   45.78
[truncated: 3,055,373 more chars]
